1 ***NCBP2*-mediated apoptosis contributes to developmental defects of the**  
2 **schizophrenia-associated 3q29 deletion**

3

4 Mayanglambam Dhruva Singh<sup>1\*</sup>, Matthew Jensen<sup>1\*</sup>, Micaela Lasser<sup>2</sup>, Emily Huber<sup>1</sup>, Tanzeen  
5 Yusuff<sup>1</sup>, Lucilla Pizzo<sup>1</sup>, Brian Lifschutz<sup>1</sup>, Inshya Desai<sup>1</sup>, Alexis Kubina<sup>1</sup>, Sneha Yennawar<sup>1</sup>,  
6 Sydney Kim<sup>2</sup>, Janani Iyer<sup>1</sup>, Diego E. Rincon-Limas<sup>3</sup>, Laura Anne Lowery<sup>2</sup>, and Santhosh  
7 Girirajan<sup>1,4</sup>

8

- 9 1. Department of Biochemistry and Molecular Biology, Pennsylvania State University,  
10 University Park, PA 16802 USA  
11 2. Department of Biology, Boston College, Chestnut Hill, MA 02467 USA  
12 3. Department of Neurology, McKnight Brain Institute, University of Florida,  
13 Gainesville, FL 32611 USA  
14 4. Department of Anthropology, Pennsylvania State University, University Park, PA  
15 16802 USA

16

17 \*contributed equally to the work

18

19 Correspondence:

20 Santhosh Girirajan, MBBS, PhD  
21 205A Life Sciences Building  
22 Pennsylvania State University  
23 University Park, PA 16802  
24 E-mail: [sxg47@psu.edu](mailto:sxg47@psu.edu)  
25 Phone: 814-865-0674

26

27

## 1 **ABSTRACT**

2 The chromosome 3q29 deletion confers >40-fold risk for schizophrenia and related  
3 neurodevelopmental disorders. Here, we used quantitative methods to assay *Drosophila*  
4 *melanogaster* and *Xenopus laevis* models with knockdown of individual 3q29 homologs in  
5 different tissues. We identified developmental and neuronal phenotypes for multiple 3q29  
6 homologs, and specifically observed cellular defects due to altered cell cycle and apoptosis  
7 mechanisms. We screened 316 pairwise knockdowns of 3q29 genes in the developing eye,  
8 and identified 44 interactions between pairs of 3q29 genes and 34 interactions with other  
9 neurodevelopmental genes. In particular, *NCBP2* synergistically enhanced the phenotypes of  
10 other 3q29 homologs in both *Drosophila* and *X. laevis*, leading to significant increases in  
11 apoptosis that disrupt cellular organization and brain morphology during development. The  
12 *NCBP2*-driven defects were rescued with overexpression of the apoptosis inhibitor  
13 *Diap1/XIAP* in both models. Our study implicates *NCBP2*-mediated genetic interactions  
14 within apoptosis pathways as a potential mechanism for pathogenicity of the 3q29 deletion.

## 15 16 **SIGNIFICANCE**

17 Rare copy-number variants, or large deletions and duplications in the genome, are associated  
18 with a wide range of neurodevelopmental disorders. For example, the 3q29 deletion confers a  
19 >40-fold risk for schizophrenia. To understand the biological mechanisms underlying the  
20 pathogenicity of this deletion, we systematically tested 14 individual homologs and 316  
21 pairwise interactions of 3q29 genes for neuronal, cellular, and developmental phenotypes in  
22 *Drosophila melanogaster* and *Xenopus laevis* models. We found that a key modifier gene,  
23 *NCBP2*, synergistically enhances the neurodevelopmental phenotypes of other 3q29 genes  
24 through disruption of apoptosis pathways. This study establishes a novel paradigm for the  
25 role of modifier genes within the region towards CNV pathogenicity and provides strong  
26 evidence for a mechanistic association between apoptosis and schizophrenia.

## 27 28 **KEYWORDS**

29 3q29 deletion, schizophrenia, neurodevelopment, copy-number variants, apoptosis,  
30 *Drosophila melanogaster*, *Xenopus laevis*, genetic interactions, oligogenic disease

31

## 1 INTRODUCTION

2 Rare copy number variants (CNVs), including deletions and duplications in the human  
3 genome, significantly contribute to complex neurodevelopmental disorders such as  
4 schizophrenia, intellectual disability/developmental delay, autism, and epilepsy (1, 2).  
5 Despite extensive phenotypic heterogeneity associated with recently described CNVs (3),  
6 certain rare CNVs have been linked to specific neuropsychiatric diagnoses. For example, the  
7 22q11.2 deletion (DiGeorge/velocardiofacial syndrome), the most frequently occurring  
8 pathogenic CNV, is found in about 1-2% of individuals with schizophrenia (4, 5), and animal  
9 models of several genes within the region show neuronal and behavioral phenotypes on their  
10 own (6, 7). Furthermore, the 1.6 Mbp recurrent deletion on chromosome 3q29, encompassing  
11 21 genes, was initially identified in individuals with a range of neurodevelopmental features,  
12 including intellectual disability, microcephaly, autism, craniofacial features, and speech  
13 delay, but further studies implicated this deletion as a major risk factor for schizophrenia (8,  
14 9). In fact, a recent meta-analysis estimated that the deletion conferred a greater than 40-fold  
15 increase in risk for schizophrenia (10, 11).

16 Although *PAK2*, *DLG1*, and *FBXO45* have been proposed as potential candidates  
17 within the 3q29 region based on their involvement in neuronal development (12), genetic  
18 studies alone have not identified a definitive causative gene (13, 14) or explained the effects  
19 of haploinsufficiency of multiple genes within the deletion (15, 16). Furthermore, the  
20 functional role of individual 3q29 genes and their interactions towards cellular pathways and  
21 mechanisms responsible for the observed neurodevelopmental defects are not completely  
22 understood. Therefore, an approach that integrates the function of individual genes within the  
23 CNV and their combinatorial effects on neuronal and cellular phenotypes is necessary to  
24 understand the pathogenicity of the deletion. Such an approach requires model systems that  
25 are amenable for rapid evaluation of developmental and cellular phenotypes, and at the same  
26 time allow for testing interactions between pairs of dosage-imbalanced genes without  
27 affecting the viability of the organism. *Drosophila melanogaster* and *Xenopus laevis* provide  
28 such powerful genetic models for studying neurodevelopmental disorders, with the ability to  
29 manipulate gene expression in a tissue-specific manner in *Drosophila* (17) and examine  
30 developmental defects in *X. laevis* (18). For example, *Drosophila* knockdown models of the  
31 candidate schizophrenia gene *DTNBPI* showed dysregulation of synaptic homeostasis and  
32 altered glutamatergic and dopaminergic neuron function (19, 20), and fly models for *UBE3A*,  
33 the gene associated with Angelman syndrome, showed sleep, memory and locomotor defects  
34 (21). Furthermore, *X. laevis* models have been widely used to identify morphological and

1 neuronal defects associated with developmental disorders (18), such as dendritic connectivity  
2 defects with overexpression of *MECP2*, the causative gene for Rett syndrome (22).

3         Here, we used a mechanistic approach to understand the role of individual homologs  
4 of 3q29 genes and their interactions towards pathogenicity of the deletion. We systematically  
5 characterized developmental, cellular, and nervous system phenotypes for 14 conserved  
6 homologs of human 3q29 genes and 316 pairwise interactions using *Drosophila*, and  
7 validated these phenotypes using *X. laevis*. We found that multiple genes in the 3q29 region,  
8 including *NCBP2*, *DLG1*, *FBXO45*, *PIGZ*, and *BDHI*, contribute to neuronal and  
9 developmental defects in both model systems by disrupting apoptosis and cell cycle  
10 pathways. The pathogenic effects of each of these genes were synergistically enhanced with  
11 concomitant reduced expression of the key modulator gene *NCBP2*, resulting in increased  
12 apoptosis and dysregulation of cell cycle genes leading to more severe cellular and neuronal  
13 defects. Our results establish an oligogenic and complex interaction-based model for  
14 pathogenicity of the 3q29 deletion, and provide evidence for apoptosis as an underlying  
15 mechanism for its associated developmental phenotypes.

16



## 1 RESULTS

### 2 Reduced expression of individual 3q29 homologs causes global developmental defects

3 We used reciprocal BLAST and orthology prediction tools (see Methods) to identify fly  
4 homologs for 15 of the 21 genes within the 3q29 deletion region (**Figure 1, Table S1**). We  
5 note that all fly homologs in this manuscript are represented as *Human<sup>fly</sup>* gene names (for  
6 example, *NCBP2<sup>Cbp20</sup>*). We used RNA interference (RNAi) and the *UAS-GAL4* system to  
7 knockdown expression levels of 3q29 homologs ubiquitously and in neuronal, wing and eye  
8 tissues (23) (**Figure 1**). Quantitative PCR (qPCR) confirmed knockdown of gene expression  
9 to an average of 50% for the tested homologs, mimicking the heterozygous condition of the  
10 deletion; fly lines for *TCTEX1D2<sup>CG5359</sup>* did not show knockdown with qPCR and were  
11 therefore excluded from further analysis (**Table S2**). To identify genes essential for organism  
12 survival and neurodevelopment, we first assessed the effect of ubiquitous knockdown of 3q29  
13 homologs using the *da-GAL4* driver (**Figure 2A**). Seven of the 14 homologs, including  
14 *DLG1<sup>dlg1</sup>*, *MF12<sup>Tsf2</sup>*, and *NCBP2<sup>Cbp20</sup>*, showed lethality or severe developmental defects with  
15 ubiquitous knockdown, suggesting that multiple 3q29 homologs are essential for viability  
16 during early development. Similarly, *BDHI<sup>CG8888</sup>*, *MF12<sup>Tsf2</sup>*, *NCBP2<sup>Cbp20</sup>* and *PAK2<sup>Pak</sup>*  
17 showed severe wing defects and *DLG1<sup>dlg1</sup>* showed larval lethality after knockdown using the  
18 wing-specific *beadex<sup>MS1096</sup>-GAL4* driver (**Figure S1A**).

19 We next tested for defects in neuronal function, including climbing assays for motor  
20 defects and staining of larval brains for axonal targeting, with knockdown of 3q29 homologs.  
21 Interestingly, *Elav-GAL4* mediated pan-neuronal knockdown caused partial larval or pupal  
22 lethality in *DLG1<sup>dlg1</sup>*, *MF12<sup>Tsf2</sup>* and *WDR53<sup>CG5543</sup>* flies (**Figure 2A**), and about 30% of adult  
23 flies with knockdown of *DLG1<sup>dlg1</sup>* did not survive beyond day 5 (**Figure S1B**), indicating an  
24 essential role for these genes in neuronal development. Furthermore, we found that flies with  
25 pan-neuronal knockdown of several 3q29 homologs, including *DLG1<sup>dlg1</sup>* and *NCBP2<sup>Cbp20</sup>*,  
26 exhibited a strong reduction in climbing ability over ten days (**Figure 2B, Video S1**),  
27 suggesting that these genes could contribute to abnormalities in synaptic and motor functions  
28 (24). We next examined the axonal projections of photoreceptor cells into the optic lobe by  
29 staining third instar larval brains with anti-chaoptin. We found that *GMR-GAL4* mediated  
30 eye-specific knockdown of *NCBP2<sup>Cbp20</sup>*, *DLG1<sup>dlg1</sup>*, *FBXO45<sup>Fsn</sup>* and *PAK2<sup>Pak</sup>* showed several  
31 axonal targeting defects (**Figure S1C**) similar to those identified in models of other  
32 schizophrenia-associated genes, such as *DISC1* on chromosome 1q24.2 and *ZDHHC8*,  
33 located within the 22q11.2 CNV region (7, 25). Overall, our data show that multiple 3q29

1 homologs are important for *Drosophila* neurodevelopment, suggesting an oligogenic model  
2 for pathogenicity of the deletion.

3

#### 4 ***Drosophila* eye models of 3q29 homologs show cellular defects**

5 The *Drosophila* compound eye has been classically used for performing high-throughput  
6 genetic screens and quantitative assays of neurodevelopmental defects (26). In fact, about  
7 two-thirds of all vital genes in the fly genome are predicted to be involved in fly eye  
8 development (27). For instance, the *Drosophila* eye model was recently used to screen a large  
9 set of intellectual disability genes (28), and genetic interaction studies using the fly eye have  
10 identified modifier genes for Rett syndrome, spinocerebellar ataxia type 3, and other  
11 conserved developmental processes (29–31). We used the developing fly eye as an *in vivo*  
12 system to quantify the effect of gene knockdown on adult eye morphology, cellular  
13 organization in the pupal eye, and cell proliferation and death in the larval imaginal eye disc.  
14 The wild-type adult *Drosophila* eye consists of about 750 ommatidia containing different cell  
15 types arranged in a regular hexagonal structure, which can be easily perturbed by genetic  
16 modifications (32, 33) (**Figure S2**). Because of this, we first performed eye-specific  
17 knockdown of 3q29 homologs using *GMR-GAL4* and measured the rough eye phenotype of  
18 each homolog using *Flynotyper*, a quantitative tool that calculates a phenotypic score based  
19 on defects in ommatidial arrangement (34). We found that 8 out of 13 homologs showed  
20 significant external eye phenotypes compared with control flies, while eye-specific  
21 knockdown of *MFI2<sup>Tsj2</sup>* caused lethality (**Figure 2C, Figure S3**). For example, knockdown of  
22 *NCBP2<sup>Cbp20</sup>* resulted in a severe rough eye phenotype that was comparable to knockdown of  
23 other neurodevelopmental genes, such as *SHANK3<sup>Prosap</sup>* and *CHD8<sup>kis</sup>* (34).

24 To examine the cellular mechanisms underlying the rough eye phenotypes observed  
25 with knockdown of 3q29 homologs, we first measured changes in area and ommatidial size  
26 of the adult eyes. We found a significant reduction in eye size with knockdown of  
27 *BDHI<sup>CG8888</sup>* and *NCBP2<sup>Cbp20</sup>*, while the eyes of *DLG1<sup>dlg1</sup>* and *PIGZ<sup>PIG-Z</sup>* flies were  
28 significantly larger than controls (**Figure 2D**). Similarly, we observed increases in  
29 ommatidial diameter for *DLG1<sup>dlg1</sup>* flies and decreases in diameter for *NCBP2<sup>Cbp20</sup>* and  
30 *BDHI<sup>CG8888</sup>* flies, suggesting that these genes also contribute to abnormal cell growth  
31 phenotypes (**Figure S3B**). We also assessed the cellular structure of 44 hour-old pupal eyes  
32 by staining the ommatidial and photoreceptor cells with anti-DLG, a septate junction marker,  
33 and Phalloidin, a marker for F-actin at cell boundaries (**Figure S2**). We found that  
34 knockdown of 11 out of 12 tested 3q29 homologs caused disorganization or loss of the

1 photoreceptor neurons and ommatidial cells (**Figure 2E, Figure S4A-B, Table S3**). For  
2 example, knockdown of *BDHI*<sup>CG8888</sup>, *DLGI*<sup>dlg1</sup>, *NCBP2*<sup>Cbp20</sup> and *WDR53*<sup>CG5543</sup> all showed  
3 defects in cone cell orientation and ommatidial rotation compared with control flies.  
4 Furthermore, *NCBP2*<sup>Cbp20</sup> and *DLGI*<sup>dlg1</sup> knockdown flies showed hexagonal defects and  
5 severe disorganization of photoreceptor neurons, while *NCBP2*<sup>Cbp20</sup> flies also showed fused  
6 secondary cells and *DLGI*<sup>dlg1</sup> flies had a complete loss of bristle cells.

7 We next hypothesized that abnormal proliferation and apoptosis may contribute to the  
8 observed cellular defects of 3q29 homologs. To test this, we stained the third instar larval eye  
9 discs of select single-hit knockdowns with anti-pH3 (phospho-Histone H3 (Ser10)) and  
10 *Drosophila* caspase-1 (*dcp1*), markers for proliferating and apoptotic cells, and quantified the  
11 number of cells posterior to the morphogenetic furrow (**Figure S2**). We observed a  
12 significant decrease in pH3-positive cells for *BDHI*<sup>CG8888</sup> knockdown flies and trends  
13 towards increased pH3-positive cells for *PIGZ*<sup>PIG-Z</sup> and *DLGI*<sup>dlg1</sup> flies (**Figure 2E-F, Figure**  
14 **S4C**), while *DLGI*<sup>dlg1</sup> also showed significant increases in cells stained with  
15 bromodeoxyuridine (BrdU), a marker for replicating cells (**Figure S4D-E**). Both *NCBP2*<sup>Cbp20</sup>  
16 and *DLGI*<sup>dlg1</sup> flies also showed a significant increase in *dcp1*-positive cells compared with  
17 controls (**Figure 2G**), and we validated increases in apoptosis for these lines using TUNEL  
18 assays (**Figure S4F**). We further tested for proliferation and apoptosis in the third instar  
19 larval wing discs of flies with knockdown of 3q29 homologs, and found significant changes  
20 in both processes for *DLGI*<sup>dlg1</sup>, *BDHI*<sup>CG8888</sup> and *NCBP2*<sup>Cbp20</sup> flies (**Figure S5**). Knockdown  
21 of *NCBP2*<sup>Cbp20</sup> in particular showed *dcp1*-positive staining across the entire wing pouch in the  
22 larval wing disc. These data suggest that multiple 3q29 homologs are involved in apoptosis  
23 and proliferation during early development, leading to defects in cell count and organization  
24 with reduced expression (**Table 1**).

25

## 26 **Interactions between 3q29 genes enhance neurodevelopmental phenotypes**

27 As knockdown fly models of multiple 3q29 homologs showed a variety of neuronal,  
28 developmental, and cellular defects, we next hypothesized that interactions between multiple  
29 genes in the region could contribute to the neurodevelopmental phenotypes of the entire  
30 deletion. We therefore generated *GMR-GAL4* recombinant lines for nine 3q29 homologs,  
31 crossed these lines with multiple RNAi or mutant lines for other 3q29 homologs to generate  
32 94 pairwise knockdowns with 163 two-hit crosses, and assessed changes in severity of eye  
33 phenotypes compared with single-hits using *Flynotyper* (**Figure 1, Table S4**). We found a  
34 significant enhancement in phenotypic severity for 44 two-hit models, which were validated

1 with a second line when available, compared with single-gene knockdowns (**Figure 3A**,  
2 **Figure S6-7**). In fact, we found that 20 out of 21 pairwise interactions involving *NCBP2<sup>Cbp20</sup>*  
3 as either a first or second-hit gene resulted in more severe eye phenotypes, suggesting that  
4 reduced expression of *NCBP2<sup>Cbp20</sup>* drastically modifies the neurodevelopmental phenotypes  
5 of other 3q29 genes (**Figure 3B-D**). For further validation, we also compared pairs of  
6 reciprocal crosses (i.e. *FBXO45<sup>Fsn</sup>/BDHI<sup>CG8888</sup>* versus *BDHI<sup>CG8888</sup>/FBXO45<sup>Fsn</sup>*) and  
7 confirmed concordant results for 21 out of 30 reciprocal interactions, including all 16  
8 reciprocal interactions involving *NCBP2<sup>Cbp20</sup>* (**Table S4**). As enhancements of the rough eye  
9 phenotype could be due to either additive effects or synergistic interactions between pairs of  
10 genes (35), we further compared *Flynotyper* scores of 31 two-hit crosses that showed  
11 enhancement with those of the individual recombined lines (**Table S4**). We found that 14 out  
12 of 16 two-hit crosses involving *NCBP2<sup>Cbp20</sup>* were significantly more severe than the additive  
13 effects of the individual single-hit crosses, suggesting that *NCBP2<sup>Cbp20</sup>* synergistically  
14 enhances the neurodevelopmental phenotypes of other 3q29 genes (**Figure S8**). Five other  
15 two-hit crosses also synergistically enhanced the single-hit phenotypes, including  
16 *DLG1<sup>dlg1</sup>/OSTalpha<sup>CG6836</sup>* and *ZDHHC19<sup>app</sup>/FBXO45<sup>Fsn</sup>*, while 10 pairwise crosses that  
17 showed enhancement of the single-hit phenotype were additive in nature. We also found a  
18 non-significant increase in severity for *DLG1<sup>dlg1</sup>/PAK2<sup>Pak</sup>* two-hit flies using both RNAi and  
19 mutant lines, concordant with the enhanced neuromuscular synapse and circadian rhythm  
20 defects observed in mutant *DLG1<sup>dlg1</sup>/PAK2<sup>Pak</sup>* two-hit flies described by Grice and colleagues  
21 (36).

22 As *NCBP2<sup>Cbp20</sup>* knockdown enhanced the rough eye phenotypes of multiple 3q29  
23 homologs, we next tested for enhancement of other neuronal defects among two-hit flies with  
24 knockdown of *NCBP2<sup>Cbp20</sup>*. We found that the simultaneous knockdown of *NCBP2<sup>Cbp20</sup>* with  
25 *DLG1<sup>dlg1</sup>* or *FBXO45<sup>Fsn</sup>* led to an increase in severity of axon targeting defects (**Figure 3E**).  
26 For instance, while only the R7 and R8 axons failed to project into the medulla with  
27 knockdown of *NCBP2<sup>Cbp20</sup>*, nearly all axons failed to project in *NCBP2<sup>Cbp20</sup>/DLG1<sup>dlg1</sup>* and  
28 *NCBP2<sup>Cbp20</sup>/FBXO45<sup>Fsn</sup>* knockdown flies. We also tested pan-neuronal knockdown of select  
29 pairs of 3q29 homologs, and found that both *NCBP2<sup>Cbp20</sup>/DLG1<sup>dlg1</sup>* and *NCBP2<sup>Cbp20</sup>/*  
30 *FBXO45<sup>Fsn</sup>* significantly enhanced the severity of climbing defects observed with knockdown  
31 of *NCBP2<sup>Cbp20</sup>* (**Figure 3F, Video S2**). Overall, these data suggest that *NCBP2<sup>Cbp20</sup>* additively  
32 or synergistically interacts with other 3q29 genes to enhance the observed cellular and  
33 neuronal phenotypes, potentially accounting for the major features of the deletion (**Table 1**).

1 To further characterize the functional effects of 3q29 gene interactions, we analyzed  
2 changes in gene expression by performing RNA-sequencing of heads from select single-hit  
3 (*NCBP2<sup>Cbp20</sup>*, *DLG1<sup>dlg1</sup>*, *FBXO45<sup>Fsn</sup>*, *PAK2<sup>Pak</sup>*) and two-hit (*NCBP2<sup>Cbp20</sup>/DLG1<sup>dlg1</sup>*,  
4 *NCBP2<sup>Cbp20</sup>/FBXO45<sup>Fsn</sup>*) flies with pan-neuronal knockdown of 3q29 homologs. We  
5 identified differentially-expressed genes in each of the single and two-hit fly models  
6 compared with controls, and performed enrichment analysis after converting the gene sets to  
7 their human homologs (**Table S5**). We found that each of the single-hit flies showed  
8 enrichment for dysregulation of basic cellular and developmental processes (**Figure S9A**).  
9 For example, *DLG1<sup>dlg1</sup>* and *NCBP2<sup>Cbp20</sup>* flies showed enrichment for dysregulation of  
10 synaptic transmission genes, including *NLGN1* and *HTR3A*. *DLG1<sup>dlg1</sup>* flies were also enriched  
11 for differential expression of ion transport genes, while all four single-hit knockdowns were  
12 enriched for disruption of genes related to metabolism and cellular respiration functions.  
13 While the dysregulated genes in *NCBP2<sup>Cbp20</sup>/DLG1<sup>dlg1</sup>* flies only showed enrichments for the  
14 same functions observed in the single-hit flies, *NCBP2<sup>Cbp20</sup>/FBXO45<sup>Fsn</sup>* flies were uniquely  
15 enriched for dysregulated cell cycle function genes, including *AURKB*, *CDK1*, *CHEK2* and  
16 *RBI* (**Figure S9B-C**). We similarly found 17 differentially-expressed apoptosis genes in  
17 *NCBP2<sup>Cbp20</sup>/FBXO45<sup>Fsn</sup>* flies, including the DNA fragmentation protein *ENDOG* (37) and the  
18 apoptosis signaling proteins *RET* and *HSPA1A* (38). Furthermore, we found a strong  
19 enrichment for genes preferentially expressed in early and mid-fetal brain tissues among  
20 genes differentially expressed in *NCBP2<sup>Cbp20</sup>/FBXO45<sup>Fsn</sup>* flies (**Figure S9D**). These data  
21 provide further evidence that *NCBP2<sup>Cbp20</sup>* synergistically interacts with other 3q29 homologs  
22 to disrupt neuronal phenotypes through apoptosis and cell cycle pathways (**Table 1**).

23

#### 24 **Interactions between *NCBP2<sup>Cbp20</sup>* and 3q29 homologs enhance apoptosis defects**

25 Cell death and proliferation are two antagonistic forces that maintain an appropriate number  
26 of neurons during development (39). While cell cycle defects have been previously linked to  
27 multiple neurodevelopmental disorders (40–42), apoptosis in particular has been proposed as  
28 a candidate mechanism for schizophrenia (43, 44). For example, increased apoptosis has been  
29 observed among schizophrenia patient-derived cell lines (45, 46), and abnormal apoptosis has  
30 been proposed as a candidate mechanism for decreased brain volume (47) and synaptic  
31 pruning defects associated with schizophrenia (48). As the larval eye and wing discs of  
32 *NCBP2<sup>Cbp20</sup>* flies showed strong increases in apoptosis, we hypothesized that apoptosis  
33 pathways could mediate the synergistic interactions observed between *NCBP2<sup>Cbp20</sup>* and other  
34 3q29 homologs. For example, we observed black necrotic patches on the ommatidia in



1 *NCBP2<sup>Cbp20</sup>/DLG1<sup>dlg1</sup>* and *NCBP2<sup>Cbp20</sup>/FBXO45<sup>Fsn</sup>* adult eyes, indicating an increase in cell  
2 death with these interactions (**Figure 4A, Figure S10A**). In fact, significantly larger regions  
3 of necrotic patches were observed in flies with concomitant homozygous knockdown of  
4 *NCBP2<sup>Cbp20</sup>* and heterozygous knockdown of *DLG1<sup>dlg1</sup>* (i.e. *NCBP2<sup>Cbp20</sup>/NCBP2<sup>Cbp20</sup>;*  
5 *DLG1<sup>dlg1</sup>*), suggesting that the knockdown of both genes contributes to ommatidial cell death  
6 (**Figure 4A**). Furthermore, we found an enhanced disruption of ommatidial cell organization  
7 and loss of photoreceptors in pupal flies with concomitant knockdown of *NCBP2<sup>Cbp20</sup>* and  
8 *DLG1<sup>dlg1</sup>*, *FBXO45<sup>Fsn</sup>* or *BDHI<sup>CG8888</sup>*, emphasizing the role of these genes in maintaining cell  
9 count and organization (**Figure 4B-C, Figure S10B, Table S6**). Based on these observations,  
10 we assayed for apoptotic cells in the larval eye discs of two-hit knockdown flies involving  
11 *NCBP2<sup>Cbp20</sup>* to determine whether the observed cellular defects were due to increased  
12 apoptosis. We observed significant increases in the number of apoptotic cells, as measured by  
13 dcp1 (**Figure 4D-E**) and TUNEL staining (**Figure S10C-D**), when *NCBP2<sup>Cbp20</sup>* was knocked  
14 down with *BDHI<sup>CG8888</sup>*, *DLG1<sup>dlg1</sup>*, or *FBXO45<sup>Fsn</sup>*. *NCBP2<sup>Cbp20</sup>/BDHI<sup>CG8888</sup>* flies also showed  
15 a decreased number of pH3-positive cells, suggesting that both apoptosis and proliferation  
16 could mediate the interaction between these two genes (**Figure 4F**).

17 To validate apoptosis as a mechanism for the cellular defects of flies with knockdown  
18 of 3q29 homologs, we crossed recombinant lines of *NCBP2<sup>Cbp20</sup>* and *DLG1<sup>dlg1</sup>* with flies  
19 overexpressing *Diap1* (death-associated inhibitor of apoptosis). *Diap1* is an E3 ubiquitin  
20 ligase that targets *Dronc*, the fly homolog of caspase-9, and prevents the subsequent  
21 activation of downstream caspases that lead to apoptosis (49). We found that overexpression  
22 of *Diap1* rescued the adult rough eye phenotypes (**Figure 5A-B**) and increased the eye sizes  
23 of *NCBP2<sup>Cbp20</sup>* and *DLG1<sup>dlg1</sup>* flies (**Figure S11A-B**). These observations were corroborated  
24 by the reversal of cellular changes in the eye, including the rescue of ommatidial structure  
25 and cell count deficits observed in *NCBP2<sup>Cbp20</sup>* and *DLG1<sup>dlg1</sup>* flies with *Diap1* overexpression  
26 (**Figure S11C-D**). Furthermore, overexpression of *Diap1* led to significant reductions in the  
27 number of TUNEL and dcp1-positive cells in the larval eye discs of *NCBP2<sup>Cbp20</sup>* and  
28 *DLG1<sup>dlg1</sup>* flies, confirming the rescue of apoptosis defects in these flies (**Figure 5E-F, Figure**  
29 **S11E-F**). When we crossed *NCBP2<sup>Cbp20</sup>/DLG1<sup>dlg1</sup>* and *NCBP2<sup>Cbp20</sup>/FBXO45<sup>Fsn</sup>* two-hit flies  
30 with flies overexpressing *Diap1*, we observed a similar rescue of the eye phenotypes,  
31 including the elimination of necrotic patches (**Figure 5C-D**) and a concomitant decrease in  
32 apoptotic cells (**Figure 5G-H**). Interestingly, *Diap1* overexpression also corrected the  
33 photoreceptor axon targeting defects of *NCBP2<sup>Cbp20</sup>* knockdown flies (**Figure S11H**),  
34 suggesting that the neuronal defects observed in these flies could be attributed to increased

1 apoptosis. We further confirmed these mechanistic findings by observing increased severity  
2 in cellular phenotypes upon overexpression of *Dronc* in *NCBP2<sup>Cbp20</sup>* and *DLG1<sup>dlg1</sup>*  
3 knockdown flies. For example, we observed black necrotic patches (**Figure 5A**) and  
4 exaggerated apoptotic responses (**Figure 5E-F, Figure S11F-G**) in *NCBP2<sup>Cbp20</sup>* knockdown  
5 flies with overexpression of *Dronc*. These results indicate that *NCBP2<sup>Cbp20</sup>*-mediated  
6 apoptosis is a primary driver of the cellular defects observed in both single and two-hit flies,  
7 suggesting that apoptosis is a candidate mechanism for pathogenicity of the deletion.

### 9 **3q29 genes interact with canonical neurodevelopmental genes**

10 We further explored the role of 3q29 genes in neurodevelopmental pathways by screening  
11 four homologs with strong neurodevelopmental phenotypes (*NCBP2<sup>Cbp20</sup>*, *DLG1<sup>dlg1</sup>*,  
12 *BDHI<sup>CG8888</sup>* and *PAK2<sup>Pak</sup>*) for interactions with 15 known neurodevelopmental genes, for a  
13 total of 60 pairwise interactions and 153 tested two-hit crosses (**Figure 6A**). We selected  
14 these neurodevelopmental genes for screening based on their association with developmental  
15 disorders in humans (34, 50), and included eight genes associated with apoptosis or cell cycle  
16 functions as well as four genes associated with microcephaly (51), a key phenotype observed  
17 in approximately 50% of 3q29 deletion carriers (8). We found that 34 pairwise interactions,  
18 validated with a second line when available, led to significant increases in eye phenotypes  
19 compared with single hits (**Figure S12, Table S7**). These interactions included 19 validated  
20 interactions of 3q29 genes with apoptosis or cell cycle genes as well as 10 interactions with  
21 microcephaly genes. We found that knockdown of *NCBP2<sup>Cbp20</sup>* enhanced the phenotypes of  
22 13 out of 15 neurodevelopmental genes, including all four microcephaly genes. In fact, four  
23 neurodevelopmental genes enhanced by *NCBP2<sup>Cbp20</sup>* (*SCN1A<sup>para</sup>*, *UBE3A<sup>Ube3A</sup>*, *CADPS2<sup>Cadps</sup>*  
24 and *PTEN<sup>Pten</sup>*) showed evidence of synergistic interactions (**Figure S8**), and knockdown of  
25 *NCBP2<sup>Cbp20</sup>* also enhanced the ommatidial necrotic patches observed with knockdown of  
26 *CTNNB1<sup>arm</sup>* (**Figure 6B**). Interestingly, we also found that knockdown of *BDHI<sup>CG8888</sup>* and  
27 *DLG1<sup>dlg1</sup>* suppressed the rough eye phenotypes of *SHANK3<sup>Prosap</sup>*, while knockdown of  
28 *PAK2<sup>Pak</sup>* suppressed the phenotypes of both *SHANK3<sup>Prosap</sup>* and *PTEN<sup>Pten</sup>* (**Figure 6B, Figure**  
29 **S8**). Several of these interactions have been previously observed to modulate neuronal  
30 function in model systems. For example, *SHANK3* interacts with *DLG1* through the mediator  
31 protein DLGAP1 to influence post-synaptic density in mice (52) and binds to proteins in the  
32 Rac1 complex, including PAK2, to regulate synaptic structure (53, 54). These results suggest  
33 that 3q29 homologs interact with key developmental genes to modify neuronal phenotypes,

1 providing a potential mechanism for variants outside of the 3q29 region to modulate the  
2 variably expressive CNV phenotypes (16).

3

#### 4 **Reduction of 3q29 gene expression causes developmental defects in *Xenopus laevis***

5 After identifying a wide range of neurodevelopmental defects due to knockdown of 3q29 fly  
6 homologs, we sought to gain further insight into the conserved functions of these genes in  
7 vertebrate embryonic brain development using the *Xenopus laevis* model system. We  
8 examined the effect of targeted knockdown of *NCBP2*, *FBXO45*, and *PAK2*, as these genes  
9 displayed multiple severe phenotypes with reduced gene expression in flies. Knockdown of  
10 each gene was accomplished using antisense morpholino oligonucleotides (MOs) targeted to  
11 early splice sites of each gene (**Figure 1**). *X. laevis* embryos were injected at either the two-  
12 or four-cell stage with various concentrations of each 3q29 gene MO or a standard control  
13 MO, and were validated using RT-PCR (**Figure S13A-B**). As reduction of *NCBP2*<sup>*Cbp20*</sup>,  
14 *FBXO45*<sup>*Fsn*</sup>, and *PAK2*<sup>*Pak*</sup> each resulted in neuronal defects in *Drosophila*, we first examined  
15 the effects of knockdown of these genes on *X. laevis* brain development at stage 47. To test  
16 this, we knocked down each gene in half of the embryo at the two-cell stage, and left the  
17 other half uninjected to create a side-by-side comparison of brain morphology (**Figure 7A**).  
18 We performed whole-mount immunostaining with anti-alpha tubulin and found that reduction  
19 of *NCBP2*, *FBXO45*, and *PAK2* each resulted in smaller forebrain and midbrain size  
20 compared with controls (**Figures 7A-C**). We also found that simultaneous knockdown of  
21 *NCBP2* with *FBXO45* caused a significant decrease in forebrain size and a trend towards  
22 decreased midbrain size compared with *NCBP2* knockdown (**Figure 7A-C**). Knockdown of  
23 *PAK2* with *NCBP2* showed a similar trend towards decreased forebrain size. We further  
24 examined the effect of knocking down 3q29 homologs on *X. laevis* eye development at stage  
25 42, and found that knockdown of these genes caused irregular shapes and decreased size  
26 compared with controls (**Figure S14A-B**). The reductions in eye size were rescued to control  
27 levels when mRNA was co-injected along with MO for each gene (**Figure S14C**). Together,  
28 these data show that individual and pairwise knockdown of 3q29 genes in *X. laevis* leads to  
29 abnormal brain and eye morphology, confirming the conserved role of these genes during  
30 vertebrate development.

31 To determine if the knockdown of 3q29 homologs also disrupted apoptotic processes  
32 in *X. laevis*, we tested whether overexpression of the X-linked inhibitor of apoptosis gene  
33 (*XIAP*) could rescue the observed developmental defects. We found that overexpression of  
34 *XIAP* rescued the midbrain and forebrain size deficits observed with *NCBP2* knockdown to



1 control levels (**Figure 7A-C**). Similarly, we found that the decreased eye sizes and  
2 morphological defects observed with knockdown of *NCBP2* were rescued with *XIAP1*  
3 overexpression (**Figure S14A-B**). To further validate these findings, we performed a Western  
4 blot following knockdown of *FBXO45* and *NCBP2* using anti-cleaved caspase-3 (Asp175) as  
5 a marker for apoptosis (**Figure 7D, Figure S13C**). We found that reduction of *FBXO45* and  
6 *NCBP2* expression each led to an increase in cleaved caspase-3 levels compared with  
7 controls, which were restored to control levels with concomitant overexpression of *XIAP*  
8 (**Figure 7E**). Caspase-3 levels were also enhanced when *FBXO45* and *NCBP2* were knocked  
9 down together (**Figure 7E**), suggesting that these two genes both contribute to developmental  
10 phenotypes by increasing apoptosis. Overall, these results suggest a role for apoptosis  
11 towards the developmental phenotypes observed with knockdown of 3q29 homologs in a  
12 vertebrate model, confirming that these findings are not specific to *Drosophila* (**Table 1**).  
13

## 1 DISCUSSION

2 Using complementary *Drosophila* and *X. laevis* models, we analyzed the molecular functions  
3 and genetic interactions of 3q29 homologs towards neurodevelopmental phenotypes. While  
4 we did not examine the entire deletion in these model systems, assaying individual 3q29  
5 genes and their interactions allowed us to identify candidate genes and cellular mechanisms  
6 potentially responsible for pathogenicity of the deletion. We found that multiple genes within  
7 the 3q29 region contribute to the observed neurodevelopmental defects, and that apoptosis  
8 pathways play a large role in mediating interactions among 3q29 homologs to determine the  
9 ultimate phenotypic trajectory of the CNV. Several themes emerged from our study that  
10 exemplify the genetic and mechanistic complexity of the 3q29 deletion, potentially leading to  
11 a better biological understanding of the disorder for its diagnosis and treatment.

12 *First*, our analysis of developmental phenotypes upon individual and pairwise  
13 knockdowns of 3q29 homologs showed that a single gene within the region is not likely to be  
14 solely responsible for the clinical features of the deletion. In fact, we found that 12 out of 14  
15 homologs showed developmental defects in *Drosophila* on their own, while every homolog  
16 showed an enhanced rough eye phenotype when knocked down along with at least one other  
17 homolog. These data provide evidence towards a multi-genic model of pathogenicity for the  
18 deletion, suggesting that complex interactions among the genes in the region are responsible  
19 for the observed developmental defects (16). Furthermore, we identified 34 interactions  
20 between 3q29 genes and canonical neurodevelopmental genes, suggesting that variants in  
21 genes outside of the CNV region could modulate the pathogenicity of the entire CNV. While  
22 our study is limited to examining conserved cellular phenotypes of 3q29 homologs in  
23 *Drosophila* and *X. laevis*, evidence from other model organisms also supports an oligogenic  
24 model for the deletion. For example, a recent study found that a mouse model of the entire  
25 3q29 deletion showed several behavioral defects, including decreased social interaction and  
26 increased startle response, that were not observed in mice with knockdown of *Dlg1*<sup>+/-</sup> on its  
27 own (15). In fact, knockout mouse models for several 3q29 genes have exhibited  
28 developmental phenotypes, including axonal and synaptic defects with knockout of *Fbxo45*<sup>-/-</sup>  
29 and embryonic lethality in *Pak2*<sup>-/-</sup> and *Pcyt1a*<sup>-/-</sup> mice (55–57) (**Table S8**). Furthermore,  
30 several 3q29 genes including *PAK2*, *DLG1*, *PCYT1A*, and *UBXN7* are under evolutionary  
31 constraint in humans based on gene pathogenicity metrics (**Table S8**). These data, combined  
32 with our findings in *Drosophila* and *X. laevis*, implicate multiple genes towards the  
33 pathogenicity caused by deletion of the entire 3q29 region.

1           *Second*, our screening of interactions between pairs of *Drosophila* 3q29 homologs  
2 identified 44 interactions with enhanced rough eye phenotypes compared with single-hit flies.  
3 Strikingly, *NCBP2*<sup>Cbp20</sup> enhanced the phenotypes of 11 out of 12 other 3q29 homologs,  
4 suggesting that *NCBP2* is a key modulator of the deletion phenotype. In fact, several two-hit  
5 flies involving *NCBP2*<sup>Cbp20</sup> knockdown were more severe than the additive effects of the  
6 individual 3q29 homologs. While additive interactions are expected with the knockdown of  
7 any two genes affecting the same phenotype, these synergistic interactions indicate that  
8 *NCBP2*<sup>Cbp20</sup> enhances the effects of other genes through involvement in common functional  
9 pathways (35). Previous studies of the 3q29 region have focused on other genes as candidates  
10 for neurodevelopmental features based on biological function and sequencing studies (58).  
11 For example, *DLG1* organizes the synaptic structure at neuromuscular junctions (59) and is  
12 enriched for mutations among individuals with schizophrenia (13). In contrast, *NCBP2*  
13 encodes a subunit of the nuclear cap-binding complex (CBC), which binds to the 5' end of  
14 mRNA and microRNA in the nucleus (60). Given the role of the CBC in post-transcriptional  
15 regulatory mechanisms such as nonsense-mediated decay, alternative splicing and mRNA  
16 transport (61, 62), it is possible that disruption of this complex could result in changes to a  
17 broad set of genes and biological processes. In fact, our analysis of differentially-expressed  
18 genes in *NCBP2*<sup>Cbp20</sup> knockdown flies showed disruption of synaptic transmission, cellular  
19 respiration and several metabolic pathways. Interestingly, *NCBP2* is not predicted to be  
20 pathogenic on its own in humans (**Table S8**) and has not been identified with deleterious  
21 mutations in sequencing studies of neurodevelopmental disease cohorts so far, indicating its  
22 potential role as a modifier of the other candidate genes in the region. Furthermore, our  
23 results complement previous reports of synergistic interactions among 3q29 homologs in the  
24 nervous system (36), representing another hallmark of an oligogenic model for the deletion.  
25 As these genetic interactions may vary across different species, developmental time-points,  
26 and tissues, the role of *NCBP2* towards deletion phenotypes and its interactions with other  
27 3q29 genes should be more deeply explored using mouse or human cell culture models.

28           *Third*, through cellular phenotyping in *Drosophila* and *X. laevis* models, we identified  
29 apoptosis as a key mechanism for pathogenicity of the 3q29 deletion. In fact, our data suggest  
30 that apoptosis is not only affected by knockdown of single 3q29 genes, but can also be  
31 synergistically disrupted with knockdown of multiple 3q29 genes (**Table 1**). For example,  
32 simultaneous knockdown of *NCBP2*<sup>Cbp20</sup> with *FBXO45*<sup>Fsn</sup> leads to enhanced cellular  
33 disorganization and altered expression of apoptosis genes in *Drosophila*, as well as enhanced  
34 morphological defects and increased caspase-3 levels in *X. laevis*. We further found that

1 overexpression of the apoptosis inhibitor *Diap1/XIAP* rescued the cellular and neuronal  
2 phenotypes observed with knockdown of 3q29 homologs, providing important validations for  
3 the involvement of apoptosis towards the deletion phenotypes (**Table 1**). Several 3q29  
4 homologs have been previously associated with apoptosis or cell cycle regulation functions  
5 (**Table S8**). For example, *DLG1* is a tumor suppressor gene whose knockdown in *Drosophila*  
6 leads to neoplasms in the developing brain and eye disc (63, 64), while *PAK2* is a key  
7 downstream mediator of the ERK signaling pathway for neuronal extension and is activated  
8 by caspases during apoptosis (56, 65, 66). Additionally, our work provides evidence that  
9 *NCBP2* regulates apoptosis during neurodevelopment, and suggests that this pathway  
10 contributes to the enhanced phenotypes observed with interactions of *NCBP2* and other 3q29  
11 genes. Our data further implicates knockdown of several 3q29 genes, including *DLG1* and  
12 *BDHI*, towards abnormal cell proliferation during development. Similar to our previous  
13 findings of disrupted cell proliferation with knockdown of genes in the 16p11.2 deletion (67),  
14 these results emphasize the importance of cell cycle regulation towards developmental  
15 phenotypes (40, 42).

16 More broadly, our results provide further evidence for apoptosis as a cellular  
17 mechanism associated with schizophrenia (44). Previous functional studies have associated  
18 abnormal apoptosis with several schizophrenia-associated processes during development (47,  
19 48), and mutations within apoptotic engulfment pathways have also been identified in  
20 sequencing studies of schizophrenia cohorts (68, 69). Importantly, our study provides direct  
21 evidence for the role of apoptosis towards the etiology of a schizophrenia-associated genetic  
22 disorder. We found further validation for this association by identifying a significant  
23 enrichment (empirical  $p=0.0136$ ) for genes associated with apoptotic processes among  
24 candidate schizophrenia genes (13) (**Figure S15**). Out of the 268 schizophrenia genes that  
25 were also involved in apoptosis, 13 genes were present within schizophrenia-associated CNV  
26 regions (70), including *CORO1A*, *MAPK3* and *TAOK2* in the 16p11.2 microduplication (71)  
27 and *AATF* and *HNF1B* in the 17q12 microdeletion (72) (**Table S9**). These genes can be  
28 further investigated using functional studies to determine the role of apoptosis towards the  
29 developmental phenotypes of these CNV disorders. In addition, our data also suggests that  
30 abnormal apoptosis could be responsible for the microcephaly phenotypes observed in 3q29  
31 deletion carriers. Apoptosis has been previously implicated towards decreased brain size in  
32 animal models (73) and syndromic forms of microcephaly in humans (74). In fact,  
33 knockdown mouse models of the primary microcephaly genes *CENPJ* and *STIL* also showed  
34 increased apoptosis (75). Furthermore, a mouse model of the Nijmegen breakage syndrome

1 gene *NBN* exhibited increased neuronal apoptosis leading to microcephaly and decreased  
2 body mass (76), suggesting that the reduction of body size observed in 3q29 deletion mice  
3 could also be due to apoptosis during early development (15). These findings highlight the  
4 importance of apoptosis towards modulating neurodevelopmental features.

5 Overall, our results show that interactions between *NCBP2* and other 3q29 genes  
6 disrupt apoptosis mechanisms to contribute towards schizophrenia and other clinical features  
7 of the deletion. The use of *Drosophila* and *X. laevis* models, both of which are amenable to  
8 high-throughput screening of developmental phenotypes, allowed us to systematically  
9 examine the conserved cellular and mechanistic roles of 3q29 homologs and their  
10 interactions. Follow-up studies in more evolutionarily advanced systems, such as mouse or  
11 human cell lines, will be useful to overcome limitations of the *Drosophila* and *X. laevis*  
12 models, including testing the neurodevelopmental phenotypes and interactions of 3q29 genes  
13 without *Drosophila* homologs. Collectively, these results emphasize the utility of quantitative  
14 functional assays for identifying conserved pathways associated with neurodevelopmental  
15 disorders, which will hopefully allow for future discoveries of treatments for these disorders.

16

## 1 MATERIALS AND METHODS

### 2 Fly stocks and genetics

3 Using reciprocal BLAST searches and ortholog predictions from the *DIOPT* v.7.1 database  
4 (77), we identified 15 fly orthologs for the 21 human genes within the chromosome 3q29  
5 region (**Table S1**). No fly homologs were present for six genes, including *LRRC33*, *CEP19*,  
6 *RNF168*, *SMCO1*, *TFRC*, and *TM4SF19*. We used a similar strategy to identify homologs for  
7 other neurodevelopmental genes tested for interactions in this study. RNAi lines for fly  
8 homologs were obtained from the Vienna Drosophila Resource Centre (78) (VDRC),  
9 including both KK and GD lines, and the Bloomington *Drosophila* Stock Centre (BDSC)  
10 (NIH P40OD018537). A list of fly RNAi lines used in this study is provided in **Table S10** for  
11 3q29 homologs and **Table S11** for other neurodevelopmental and apoptosis genes. All 3q29  
12 lines were tested for gene knockdown with qualitative real-time PCR, and select KK lines  
13 were also tested for overexpression of *tiptop* due to RNAi insertion at the 5'UTR of the gene  
14 (79) (**Table S2**). As the available lines for *TCTEXID2*<sup>CG5359</sup> failed to achieve the desired  
15 gene knockdown and showed overexpression of *tiptop*, these lines were excluded and a total  
16 of 14 fly homologs were tested in this study. Microarray data and modENCODE Anatomy  
17 RNA-Seq from FlyBase (80, 81) showed that all of the 14 tested homologs were expressed in  
18 the fly central nervous system and eye tissues (**Table S1**).

19 All fly stocks and crosses were cultured on conventional cornmeal-sucrose-dextrose-  
20 yeast medium at 25°C, unless otherwise indicated. RNAi lines were crossed with a series of  
21 *GAL4* driver lines to achieve tissue-specific knockdown of genes, including *da-GAL4* (Scott  
22 Selleck, Penn State) for ubiquitous, *GMR-GAL4* (Zhi-Chun Lai, Penn State) and *GMR-*  
23 *GAL4;UAS-Dicer2* (Claire Thomas, Penn State) for eye-specific, *beadex*<sup>MS1096</sup>-*GAL4;UAS-*  
24 *Dicer2* (Zhi-Chun Lai, Penn State) for wing-specific, and *Elav-GAL4* (Mike Grotewil,  
25 VCU) for pan-neuronal knockdown of gene expression. To perform interaction studies, we  
26 generated recombinant stock lines of *GMR-GAL4* with reduced expression of nine select  
27 3q29 homologs (**Table S4**). Females from these stocks with constitutively reduced gene  
28 expression for each of these genes were crossed with RNAi lines of other homologs to  
29 achieve simultaneous knockdown of two genes (**Figure 1**). We previously demonstrated that  
30 these two-hit crosses had adequate *GAL4* to bind to two independent *UAS-RNAi* constructs  
31 (67).

32  
33  
34

## 1 **Quantitative real-time polymerase chain reaction**

2 Levels of gene expression knockdown were confirmed using quantitative real-time PCR (RT-  
3 PCR) on RNA isolated from fly heads (**Table S2**). Briefly, each RNAi line was crossed with  
4 *Elav-GAL4* at 25°C to achieve pan-neuronal knockdown of the fly homolog. Adult fly heads  
5 at day 3 were separated by vortexing, and total RNA was isolated using TRIzol (Invitrogen,  
6 Carlsbad, CA, USA). cDNA was prepared using the qScript cDNA synthesis kit (Quantabio,  
7 Beverly, MA, USA). Quantitative real-time PCR (qPCR) was performed using an Applied  
8 Biosystems Fast 7500 system with SYBR Green PCR master mix (Quantabio) to estimate the  
9 level of gene expression. Primers were designed using NCBI Primer-BLAST (82), with  
10 primer pairs separated by an intron in the corresponding genomic DNA. All experiments  
11 were performed using three biological replicates. A list of primers used in the experiments is  
12 provided in **Table S2**. The delta-delta Ct value method was used to obtain the relative  
13 expression of fly homologs in the RNAi lines compared with controls (83).

14

## 15 **Climbing assay**

16 We set up fly crosses at 25°C with *Elav-GAL4* to obtain pan-neuronal knockdown of the  
17 tested 3q29 homologs. For each genotype, groups of ten female flies were first allowed to  
18 adjust at room temperature for 30 minutes and then transferred to a climbing apparatus, made  
19 by joining two vials, and allowed to adjust for 5 minutes. The flies were tapped down to the  
20 bottom, and the number of flies climbing past the 8 cm mark measured from the bottom of  
21 the apparatus in 10 seconds was then counted. This assay was repeated nine additional times  
22 for each group, with a one-minute rest between trials. The sets of 10 trials for each group  
23 were repeated daily for ten days, capturing data from 100 replicates from day 1 until day 10,  
24 starting the experiments with 1-2-day old flies. All experiments were performed during the  
25 same time of the day for consistency of results. Two-way ANOVA and pairwise two-tailed T  
26 tests were used to determine significance for each genotype and day of experiment (**Table**  
27 **S12**). All statistical analysis in the manuscript was performed using R v.3.4.2 (R Foundation  
28 for Statistical Computing, Vienna, Austria).

29

## 30 **Imaging of adult fly eyes and wings**

31 We crossed RNAi lines with *GMR-GAL4* and reared at 29°C for eye-specific knockdown and  
32 *beadex<sup>MS1096</sup>-GAL4* at 25°C for wing-specific knockdown. For eye imaging, adult 2-3-day old  
33 female progenies from the crosses were collected, immobilized by freezing at -80°C,  
34 mounted on Blu-tac (Bostik Inc, Wauwatosa, WI, USA), and imaged using an Olympus



1 BX53 compound microscope with LMPLan N 20X air objective using a DP73 c-mount  
2 camera at 0.5X magnification and a z-step size of 12.1 $\mu$ m. (Olympus Corporation, Tokyo,  
3 Japan). We used CellSens Dimension software (Olympus Corporation, Tokyo, Japan) to  
4 capture the images, and stacked the image slices using Zerene Stacker (Zerene Systems LLC,  
5 Richland, WA, USA). Eye images for *Diap1* rescue of two-hit models were captured with a  
6 Leica Z16APO microscope using a PLAN APO 2X objective lens, and stacked using Leica  
7 Application Suite v.4.1 (Leica Microsystems, Buffalo Grove, IL, USA). All eye images  
8 presented in this study are maximum projections of 20 consecutive optical z-sections. Adult  
9 wings were plucked from 2-5 day old female flies, mounted on a glass slide, covered with a  
10 coverslip and sealed with clear nail polish. The wings were imaged using a Zeiss Discovery  
11 V20 stereoscope (Zeiss, Thornwood, NY, USA) with ProgRes Speed XT Core 3 camera  
12 (Jenoptik AG, Jena, Germany) using a 40X objective, and images were captured with  
13 ProgRes CapturePro v.2.8.8.

14

### 15 **Quantitative phenotyping of fly eyes using *Flynotyper***

16 We used a computational method called *Flynotyper* (<http://flynotyper.sourceforge.net/>) to  
17 measure the degree of roughness of the adult eyes (34). The software uses an algorithm to  
18 detect the center of each ommatidium, and calculates a phenotypic score based on the number  
19 of ommatidia detected, the lengths of six local vectors with direction pointing from each  
20 ommatidium to the neighboring ommatidia, and the angle between these six local vectors  
21 (**Figure S2**). Using *Flynotyper*, we obtained quantitative measures for roughness of the fly  
22 eye with single gene or pairwise gene knockdown. These results were compared to controls  
23 using one-tailed or two-tailed Mann-Whitney tests (**Table S12**), and two-way ANOVA tests  
24 were used to identify synergistic enhancement or suppression of the respective single-hit  
25 phenotypes (**Figure S8**).

26

### 27 **Immunohistochemistry of eye and wing discs**

28 Third instar larval and 44-hour-old pupal eye discs, reared at 29°C, and third instar larval  
29 wing discs, reared at 25°C, were dissected in 1X phosphate-buffered saline (PBS) and fixed  
30 in 4% paraformaldehyde for 20 minutes. The eye and wing discs were then washed thrice in  
31 PBT for 10 minutes each, treated with 1% blocking solution for 30 minutes, and then  
32 incubated overnight with primary antibodies at 4°C. Rabbit anti-cleaved *Drosophila* dcp1  
33 (Asp216) (1:100; 9578S, Cell Signaling Technology, Danvers, MA, USA), a marker for cells  
34 undergoing apoptosis, and Mouse anti-phospho-Histone H3 (S10) antibody (1:100; 9706L,



1 Cell Signaling Technology), a mitotic marker for measuring proliferating cells, were used to  
2 assay cell cycle and apoptosis defects in larval eye and wing discs. Mouse anti-DLG (1:200;  
3 4F3, DSHB, Iowa City, Iowa, USA), a septate junction marker, and Rhodamine Phalloidin  
4 (1:200; R415, Invitrogen Molecular Probes, Carlsbad, CA, USA), an F-actin marker, were  
5 used to visualize and count ommatidial cells and photoreceptor cells in pupal eyes. Mouse  
6 anti-chaoptin (1:200; 24B10, DSHB) was used to visualize retinal axon projections.  
7 Preparations were then washed for 10 minutes thrice with PBT, and incubated for two hours  
8 with fluorophore-conjugated secondary antibodies (Alexa fluor 568 goat anti-mouse (1:200)  
9 (A11031), Alexa fluor 488 goat anti-mouse (1:200) (A11029), Alexa fluor 647 goat anti-  
10 rabbit (1:200) (A21245), and Alexa fluor 647 goat anti-mouse (1:200) (A21236), Invitrogen  
11 Molecular Probes, Carlsbad, CA, USA)) with gentle shaking. Final washes were performed in  
12 PBS for 10 minutes, and the tissues were then mounted in Prolong Gold antifade mounting  
13 media with DAPI (P36930, Thermo Fisher Scientific, Waltham, MA, USA) or Vectashield  
14 hard set mounting media with DAPI (H-1500, Vector Laboratories, Burlingame, CA, USA)  
15 for imaging.

16

### 17 **Bromouridine staining**

18 Third instar larval eye discs were dissected in PBS and immediately transferred to  
19 Schneider's Insect Media (Sigma-Aldrich, St. Louis, MO). The tissues were then incubated in  
20 10  $\mu$ M BrdU (Sigma-Aldrich) at 25°C for one hour with constant agitation to allow for  
21 incorporation of BrdU into DNA of replicating cells during the S-phase of cell cycle. The  
22 samples were washed thrice with PBS for five minutes each and fixed in 4%  
23 paraformaldehyde for 20 minutes. To denature DNA, the tissues were acid-treated in 2N HCl  
24 for 20 minutes, neutralized in 100 mM Borax solution for 2 minutes, washed thrice in 10X  
25 PBT (PBS+0.1% Tween-20) for 10 minutes, and treated with blocking solution (PBS, 0.2%  
26 Triton X-100, 5% Normal Goat serum) for one hour. The tissues were then incubated in  
27 mouse anti-BrdU (1:200; G3G4, DSHB, Iowa City, Iowa, USA) diluted in blocking solution  
28 overnight at 4°C. The next day, the tissues were washed thrice in PBT for 20 minutes each  
29 and incubated in Alexa fluor 568 goat anti-mouse (1:200, Invitrogen Molecular Probes,  
30 Carlsbad, CA, USA) for two hours with constant agitation. Finally, the samples were  
31 mounted in Prolong Gold antifade reagent with DAPI (Thermo Fisher Scientific, Waltham,  
32 MA, USA) for imaging.

33

34

## 1 **Terminal deoxynucleotidyl transferase (TUNEL) Assay**

2 The levels of cell death in the developing eye were evaluated by staining using the *In Situ*  
3 Cell Death Detection Kit, TMR Red (Roche, Basel, Switzerland). The third instar larval eye  
4 discs were dissected in PBS and fixed in 4% paraformaldehyde for 20 minutes at room  
5 temperature. The dissected tissues were permeabilized by treating with 20 µg/ml proteinase K  
6 (Sigma-Aldrich, St. Louis, MO, USA) for two minutes, washed in PBT for 30 minutes, and  
7 fixed again in 4% paraformaldehyde for 15 minutes. The tissues were then incubated  
8 overnight with TUNEL (terminal deoxynucleotidyl transferase dUTP nick end labeling)  
9 reaction mixture at 4°C per the manufacturer's instructions, and washed five times in PBT for  
10 15 minutes each. Finally, tissues were mounted in Prolong-gold antifade containing DAPI  
11 (Thermo Fisher Scientific, Waltham, MA, USA) for imaging.

12

## 13 **Confocal imaging and analysis**

14 Confocal images of larval and pupal eye discs were captured using an Olympus Fluoview  
15 FV1000 laser scanning confocal microscope (Olympus America, Lake Success,  
16 NY). Maximum projections of all optical sections were generated for display. Acquisition  
17 and processing of images was performed with the Fluoview software (Olympus  
18 Corporation, Tokyo, Japan), and the z-stacks of images were merged using ImageJ (84).  
19 Images for experiments using *Diap1* overexpression for rescue of two-hit models were  
20 captured using a Nikon A1RMPsi-STORM (4.0) confocal microscope with a PLAN APO  
21 20X lens (Nikon Instruments Inc., Tokyo, Japan), and were stacked using NIS Element AR  
22 Analysis v.4.51.00. The number of pH3, BrdU, TUNEL, and dcp1-positive cells from larval  
23 eye discs were counted using two ImageJ plugins, AnalyzeParticles and Image-based Tool  
24 for Counting Nuclei (ITCN). As we found a strong correlation (Pearson correlation,  $r=0.736$ ,  
25  $p<2.2\times 10^{-16}$ ) between the two methods (**Figure S2D**), all cell counts displayed for eye data  
26 were derived from ITCN analysis. Proliferating cells in larval wing discs stained with pH3  
27 were counted using AnalyzeParticles, and apoptotic cells in wing discs stained with dcp1  
28 were analyzed using manual counting. For statistical analysis, we compared the tested  
29 genotypes with controls using two-tailed Mann-Whitney tests (**Table S12**).

30

## 31 **Differential expression analysis of transcriptome data**

32 We performed RNA sequencing (RNA-Seq) of samples isolated from fly heads of *Elav-*  
33 *GAL4* crosses for four single-hit (*DLG1<sup>dlg1</sup>*, *NCBP2<sup>Cbp20</sup>*, *PAK2<sup>Pak</sup>*, *FBXO45<sup>Fsn</sup>*) and two two-  
34 hit (*NCBP2<sup>Cbp20</sup>/DLG1<sup>dlg1</sup>* and *NCBP2<sup>Cbp20</sup>/FBXO45<sup>Fsn</sup>*) knockdowns of 3q29 homologs, and

1 compared gene expression levels to VDRC control flies carrying the same genetic  
2 background (GD or KK). We prepared cDNA libraries for three biological replicates per  
3 genotype using TruSeq Stranded mRNA LT Sample Prep Kit (Illumina, San Diego, CA), and  
4 performed single-end sequencing using Illumina HiSeq 2000 at the Penn State Genomics  
5 Core Facility to obtain 100 bp reads at an average coverage of 36.0 million aligned  
6 reads/sample. We used Trimmomatic v.0.36 (85) for quality control assessment, TopHat2  
7 v.2.1.1 (86) to align the raw sequencing data to the reference fly genome and transcriptome  
8 (build 6.08), and HTSeq-Count v.0.6.1 (87) to calculate raw read counts for each gene. edgeR  
9 v.3.20.1 (88) (generalized linear model option) was used to perform differential expression  
10 analysis, and genes with log<sub>2</sub>-fold changes >1 or <-1 and corrected false-discovery rates less  
11 than 0.05 were considered to be differentially expressed (**Table S12**). Human homologs of  
12 differentially-expressed fly genes (top matches for each fly gene, excluding matches with  
13 “low” rank) were identified using DIOPT (77). Enrichment analysis of Panther GO-Slim  
14 Biological Process terms among the differentially-expressed genes was performed using the  
15 PantherDB Gene List Analysis tool (89). Enrichments for genes preferentially expressed in  
16 the developing brain were calculated using the Cell-type Specific Expression Analysis tool  
17 (90) based on expression data from the BrainSpan Atlas (91).

18

### 19 ***X. laevis* embryos**

20 Eggs collected from female *X. laevis* frogs were fertilized *in vitro*, dejellied, and cultured  
21 following standard methods (92, 93). Embryos were staged according to Nieuwkoop and  
22 Faber (94). All experiments were approved by the Boston College Institutional Animal Care  
23 and Use Committee and were performed according to national regulatory standards.

24

### 25 **Morpholino and RNA constructs**

26 Morpholinos (MOs) were targeted to early splice sites of *X. laevis* *NCBP2*, *FBXO45*, *PAK2*,  
27 or standard control MO, purchased from Gene Tools LLC (Philomath, OR, USA). MO  
28 sequences are listed in **Table S13**. For knockdown experiments, all MOs were injected at  
29 either the 2-cell or 4-cell stage, with embryos receiving injections two or four times total in  
30 0.1X MMR containing 5% Ficoll. *FBXO45* and control MOs were injected at 10ng/embryo,  
31 *NCBP2* and control MOs were injected at 20ng/embryo, and *PAK2* and control MOs were  
32 injected at 50ng/embryo. For rescue experiments, the same amounts of MOs used in the KD  
33 experiments were injected along with gene-specific mRNA tagged with GFP (800pg/embryo  
34 for *XIAP*-GFP; 1000pg/embryo for *NCBP2*-GFP and *FBXO45*-GFP, and 300pg/embryo for

1 *PAK2*-GFP) in the same injection solution. Capped mRNAs were transcribed *in vitro* using  
2 SP6 or T7 mMessage mMachine Kit (Thermo Fisher Scientific, Waltham, MA, USA). RNA  
3 was purified with LiCl precipitation. *X. laevis* *NCBP2*, *FBXO45*, *PAK2*, and *XIAP* ORFs  
4 obtained from the European *Xenopus* Resource Center (EXRC, Portsmouth, UK) were  
5 gateway-cloned into pCSf107mT-GATEWAY-3'GFP destination vectors. Constructs used  
6 included *NCBP2*-GFP, *FBXO45*-GFP, *PAK2*-GFP, *XIAP*-GFP, and GFP in pCS2+. Embryos  
7 either at the 2-cell or 4-cell stage received four injections in 0.1X MMR containing 5% Ficoll  
8 with the following total mRNA amount per embryo: 300pg of GFP, 800pg of *XIAP*-GFP,  
9 1000pg *NCBP2*-GFP, 1000pg of *FBXO45*-GFP, and 300pg of *PAK2*-GFP.

10

### 11 **RT-PCR for morpholino validation and knockdown**

12 Morpholino validation and knockdown was assessed using RT-PCR. Total RNA was  
13 extracted using TRIzol reagent (Life Technologies, Grand Island, NY, USA), followed by  
14 chloroform extraction and ethanol precipitation from 2-day old embryos injected with  
15 increasing concentrations of MO targeted to each tested 3q29 gene. cDNA synthesis was  
16 performed with SuperScript II Reverse Transcriptase (Life Technologies, Grand Island, NY,  
17 USA) and random hexamers. PCR primers are listed in **Table S14**. RT-PCR was performed  
18 in triplicate (**Figure S13A**), with band intensities quantified by densitometry in ImageJ and  
19 normalized to the uninjected control mean relative to *ODCI*, which was used as a  
20 housekeeping control.

21

### 22 **Brain and eye morphology assays**

23 In brain morphology experiments, all embryos received two injections at the 2-cell stage in  
24 0.1X MMR containing 5% Ficoll. One cell was left uninjected and the other cell was injected  
25 with either control MO or MO targeted to the tested 3q29 gene, along with 300pg of GFP  
26 mRNA in the same injection solution. Stage 47 tadpoles were fixed in 4% PFA diluted in  
27 PBS for one hour, rinsed in PBS and gutted to reduce autofluorescence. Embryos were  
28 incubated in 3% bovine serum albumin and 1% Triton-X 100 in PBS for two hours, and then  
29 incubated in anti-acetylated tubulin primary antibody (1:500, monoclonal, clone 6-11B-1,  
30 AB24610, Abcam, Cambridge, UK) and goat anti-mouse Alexa fluor 488 conjugate  
31 secondary antibody (1:1000, polyclonal, A11029, Invitrogen Life Technologies, Carlsbad,  
32 CA). Embryos were then rinsed in 1% PBS-Tween and imaged in PBS. Skin dorsal to the  
33 brain was removed if the brain was not clearly visible due to pigment. For eye phenotype  
34 experiments, all embryos received four injections at the 2-cell or 4-cell stage in 0.1X MMR

1 containing 5% Ficoll with either the control MO or MOs targeted to each 3q29 gene. Stage  
2 42 tadpoles were fixed in 4% PFA diluted in PBS. Tadpoles were washed three times in 1%  
3 PBS-Tween for one hour at room temperature before imaging.

#### 4 5 ***X. laevis* image acquisition and analysis**

6 Lateral view images of stage 42 tadpoles for eye experiments and dorsal view images of stage  
7 47 tadpoles for brain experiments were each collected on a SteREO Discovery.V8  
8 microscope using a Zeiss 5X objective and Axiocam 512 color camera (Zeiss, Thornwood,  
9 NY, USA). Areas of the left and right eye, forebrain, and midbrain were determined from raw  
10 images using the polygon area function in ImageJ. Eye size was quantified by taking the  
11 average area of both the left and right eye, while forebrain and midbrain area were quantified  
12 by taking the ratio between the injected side versus the uninjected side for each sample. For  
13 statistical analysis, we compared the tested genotypes with controls using unpaired two-tailed  
14 t-tests (**Table S12**).

#### 15 16 **Western blot for apoptosis**

17 Embryos at stages 20-22 were lysed in buffer (50mM Tris pH 7.5, 1% NP40, 150mM NaCl,  
18 1mM PMSF, 0.5 mM EDTA) supplemented with cOmplete Mini EDTA-free Protease  
19 Inhibitor Cocktail (Sigma-Aldrich, Basel, Switzerland). Blotting was carried out using rabbit  
20 polyclonal antibody to cleaved caspase-3 (1:500, 9661S, Cell Signaling Technology,  
21 Danvers, MA, USA), with mouse anti-beta actin (1:2500, AB8224, Abcam, Cambridge, UK)  
22 as a loading control. Chemiluminescence detection was performed using Amersham ECL  
23 Western blot reagent (GE Healthcare Bio-Sciences, Pittsburgh, PA, USA). Band intensities  
24 were quantified by densitometry in ImageJ and normalized to the control mean relative to  
25 beta-actin.

#### 26 27 **Overlap between schizophrenia and apoptosis gene sets**

28 We obtained a set of 1,794 genes annotated with the Gene Ontology term for apoptotic  
29 processes (GO:0006915) or children terms from the Gene Ontology Consortium (95)  
30 (AmiGO v.2.4.26), and compared this gene set to a set of 2,546 candidate schizophrenia  
31 genes curated by Purcell and colleagues (13). We found 268 genes that overlapped across the  
32 two sets (**Table S12**). To determine the statistical significance of this overlap, we performed  
33 100,000 simulations to identify the number of apoptosis genes in randomly selected groups of

1 2,546 genes (**Figure S15**), and found that the 268 overlapping genes were in the top 98.64%  
2 of the simulation results (empirical  $p=0.0136$ ).

3

#### 4 **Reproducibility**

5 *Drosophila* negative geotaxis, immunohistochemistry/confocal microscopy and key eye  
6 imaging experiments were performed on multiple independent occasions to ensure  
7 reproducibility of our results; all *Drosophila* data shown were derived from single  
8 experimental runs containing multiple samples. *X. laevis* experiments were performed on at  
9 least three independent occasions to ensure reproducibility, with the data representing  
10 consistent findings from these multiple replicates.

11

#### 12 **Data availability**

13 Gene expression data for the six *Drosophila* single-gene and two-hit models of 3q29  
14 homologs are deposited in the GEO (Gene Expression Omnibus) database with accession  
15 code GSE128094, and the raw RNA Sequencing files are deposited in the SRA (Sequence  
16 Read Archive) with BioProject accession PRJNA526450. All unique biological materials  
17 described in the manuscript, such as recombinant fly stocks, are readily available from the  
18 authors upon request.

19

#### 20 **Code availability**

21 All source code and datasets for generating genomic data (RNA-Seq and  
22 schizophrenia/apoptosis gene overlap) are available on the Girirajan lab GitHub page at  
23 [https://github.com/girirajanlab/3q29\\_project](https://github.com/girirajanlab/3q29_project).

24

25

#### 26 **ACKNOWLEDGMENTS**

27 We thank V. Faundez for useful discussions and critical reading of the manuscript, and J.  
28 Tiber for technical assistance with the *X. laevis* experiments. This work was supported by  
29 a Basil O'Connor Award from the March of Dimes Foundation (#5-FY14-66), NIH R01-  
30 GM121907, a NARSAD Young Investigator Grant from the Brain and Behavior Research  
31 Foundation (22535), and resources from the Huck Institutes of the Life Sciences to S.G.,  
32 NIH T32-GM102057 to M.J., and NIH R01-MH109651 to L.A.L.

33

34

1 **AUTHOR CONTRIBUTIONS**

2 M.D.S., M.J., and S.G. designed the study. M.D.S, E.H., T.Y., L.P., B.L., I.P., A.K., S.Y., J.I.  
3 and D.E.R.L. performed the *Drosophila* experiments, and M.L. and L.A.L. designed and  
4 performed the *X. laevis* experiments. M.D.S., M.J., T.Y., J.I., M.L., and S.G. analyzed the  
5 data. M.D.S., M.J., and S.G. wrote the manuscript with input from all authors.

6

7 **COMPETING INTERESTS**

8 The authors declare that they have no competing interests.



## 1 REFERENCES

- 2 1. Malhotra D, Sebat J (2012) CNVs: harbingers of a rare variant revolution in  
3 psychiatric genetics. *Cell* 148(6):1223–41.
- 4 2. Girirajan S, Campbell CD, Eichler EE (2011) Human Copy Number Variation and  
5 Complex Genetic Disease. *Annu Rev Genet* 45(1):203–226.
- 6 3. Girirajan S, Eichler EE (2010) Phenotypic variability and genetic susceptibility to  
7 genomic disorders. *Hum Mol Genet* 19(R2):R176–87.
- 8 4. Karayiorgou M, et al. (1995) Schizophrenia susceptibility associated with interstitial  
9 deletions of chromosome 22q11. *Proc Natl Acad Sci U S A* 92(17):7612–6.
- 10 5. Karayiorgou M, Simon TJ, Gogos JA (2010) 22q11.2 microdeletions: linking DNA  
11 structural variation to brain dysfunction and schizophrenia. *Nat Rev Neurosci*  
12 11(6):402–16.
- 13 6. Fenelon K, et al. (2011) Deficiency of Dgcr8, a gene disrupted by the 22q11.2  
14 microdeletion, results in altered short-term plasticity in the prefrontal cortex. *Proc Natl*  
15 *Acad Sci U S A* 108(11):4447–4452.
- 16 7. Mukai J, et al. (2015) Molecular substrates of altered axonal growth and brain  
17 connectivity in a mouse model of schizophrenia. *Neuron* 86(3):680–95.
- 18 8. Ballif BC, et al. (2008) Expanding the clinical phenotype of the 3q29 microdeletion  
19 syndrome and characterization of the reciprocal microduplication. *Mol Cytogenet*  
20 1(1):8.
- 21 9. Mulle JG, et al. (2010) Microdeletions of 3q29 Confer High Risk for Schizophrenia.  
22 *Am J Hum Genet* 87(2):229–236.
- 23 10. Kirov G, et al. (2012) De novo CNV analysis implicates specific abnormalities of  
24 postsynaptic signalling complexes in the pathogenesis of schizophrenia. *Mol*  
25 *Psychiatry* 17(2):142–153.
- 26 11. Mulle JG (2015) The 3q29 deletion confers >40-fold increase in risk for  
27 schizophrenia. *Mol Psychiatry* 20(9):1028–1029.
- 28 12. Quintero-Rivera F, Sharifi-Hannauer P, Martinez-Agosto JA (2010) Autistic and  
29 psychiatric findings associated with the 3q29 microdeletion syndrome: Case report and  
30 review. *Am J Med Genet Part A* 152A(10):2459–2467.
- 31 13. Purcell SM, et al. (2014) A polygenic burden of rare disruptive mutations in  
32 schizophrenia. *Nature* 506(7487):185–190.
- 33 14. Fromer M, et al. (2014) De novo mutations in schizophrenia implicate synaptic  
34 networks. *Nature* 506(7487):179–184.
- 35 15. Rutkowski TP, et al. (2019) Behavioral changes and growth deficits in a CRISPR  
36 engineered mouse model of the schizophrenia-associated 3q29 deletion. *Mol*  
37 *Psychiatry*. doi:10.1038/s41380-019-0413-5.
- 38 16. Jensen M, Girirajan S (2019) An interaction-based model for neuropsychiatric features  
39 of copy-number variants. *PLoS Genet* 15(1):e1007879.
- 40 17. Wangler MF, Yamamoto S, Bellen HJ (2015) Fruit flies in biomedical research.



- 1           *Genetics* 199(3):639–53.
- 2   18.   Pratt KG, Khakhalin AS (2013) Modeling human neurodevelopmental disorders in the  
3       Xenopus tadpole: from mechanisms to therapeutic targets. *Dis Model Mech* 6(5):1057–  
4       65.
- 5   19.   Dickman DK, Davis GW (2009) The Schizophrenia Susceptibility Gene dysbindin  
6       Controls Synaptic Homeostasis. *Science* 326(5956):1127–1130.
- 7   20.   Shao L, et al. (2011) Schizophrenia susceptibility gene dysbindin regulates  
8       glutamatergic and dopaminergic functions via distinctive mechanisms in *Drosophila*.  
9       *Proc Natl Acad Sci U S A* 108(46):18831–18836.
- 10 21.   Gatto CL, Broadie K (2011) *Drosophila* modeling of heritable neurodevelopmental  
11       disorders. *Curr Opin Neurobiol* 21(6):834–41.
- 12 22.   Marshak S, Meynard MM, De Vries YA, Kidane AH, Cohen-Cory S (2012) Cell-  
13       autonomous alterations in dendritic arbor morphology and connectivity induced by  
14       overexpression of MeCP2 in *Xenopus* central neurons in vivo. *PLoS One* 7(3):e33153.
- 15 23.   Brand AH, Perrimon N (1993) Targeted gene expression as a means of altering cell  
16       fates and generating dominant phenotypes. *Development* 118(2):401–15.
- 17 24.   Sherwood NT, Sun Q, Xue M, Zhang B, Zinn K (2004) *Drosophila* spastin regulates  
18       synaptic microtubule networks and is required for normal motor function. *PLoS Biol*  
19       2(12):e429.
- 20 25.   Chen S-Y, Huang P-H, Cheng H-J (2011) Disrupted-in-Schizophrenia 1-mediated  
21       axon guidance involves TRIO-RAC-PAK small GTPase pathway signaling. *Proc Natl*  
22       *Acad Sci U S A* 108(14):5861–6.
- 23 26.   Thomas BJ, Wassarman DA (1999) A fly’s eye view of biology. *Trends Genet*  
24       15(5):184–90.
- 25 27.   Thaker HM, Kankel DR (1992) Mosaic analysis gives an estimate of the extent of  
26       genomic involvement in the development of the visual system in *Drosophila*  
27       melanogaster. *Genetics* 131(4):883–94.
- 28 28.   Oortveld MAW, et al. (2013) Human Intellectual Disability Genes Form Conserved  
29       Functional Modules in *Drosophila*. *PLoS Genet* 9(10):e1003911.
- 30 29.   Cukier HN, et al. (2008) Genetic modifiers of MeCP2 function in *Drosophila*. *PLoS*  
31       *Genet* 4(9):e1000179.
- 32 30.   Bilen J, Bonini NM (2007) Genome-wide screen for modifiers of ataxin-3  
33       neurodegeneration in *Drosophila*. *PLoS Genet* 3(10):1950–64.
- 34 31.   Neufeld TP, Tang AH, Rubin GM (1998) A genetic screen to identify components of  
35       the sina signaling pathway in *Drosophila* eye development. *Genetics* 148(1):277–86.
- 36 32.   Cagan RL, Ready DF (1989) The emergence of order in the *Drosophila* pupal retina.  
37       *Dev Biol* 136(2):346–62.
- 38 33.   Kumar JP (2012) Building an ommatidium one cell at a time. *Dev Dyn* 241(1):136–  
39       149.
- 40 34.   Iyer J, et al. (2016) Quantitative Assessment of Eye Phenotypes for Functional Genetic

- 1 Studies Using *Drosophila melanogaster*. *G3 (Bethesda)* 6(5):1427–1437.
- 2 35. Mackay TFC (2014) Epistasis and quantitative traits: using model organisms to study  
3 gene-gene interactions. *Nat Rev Genet* 15(1):22–33.
- 4 36. Grice SJ, Liu J-L, Webber C (2015) Synergistic Interactions between *Drosophila*  
5 Orthologues of Genes Spanned by De Novo Human CNVs Support Multiple-Hit  
6 Models of Autism. *PLOS Genet* 11(3):e1004998.
- 7 37. Li LY, Luo X, Wang X (2001) Endonuclease G is an apoptotic DNase when released  
8 from mitochondria. *Nature* 412(6842):95–9.
- 9 38. Bordeaux MC, et al. (2000) The RET proto-oncogene induces apoptosis: a novel  
10 mechanism for Hirschsprung disease. *EMBO J* 19(15):4056–63.
- 11 39. Yamaguchi Y, Miura M (2015) Programmed Cell Death in Neurodevelopment. *Dev*  
12 *Cell* 32(4):478–490.
- 13 40. Marchetto MC, et al. (2017) Altered proliferation and networks in neural cells derived  
14 from idiopathic autistic individuals. *Mol Psychiatry* 22(6):820–835.
- 15 41. Pinto D, et al. (2010) Functional impact of global rare copy number variation in autism  
16 spectrum disorders. *Nature* 466(7304):368–372.
- 17 42. Ernst C (2016) Proliferation and Differentiation Deficits are a Major Convergence  
18 Point for Neurodevelopmental Disorders. *Trends Neurosci* 39(5):290–299.
- 19 43. Fatemi SH, Folsom TD (2009) The Neurodevelopmental Hypothesis of Schizophrenia,  
20 Revisited. *Schizophr Bull* 35(3):528–548.
- 21 44. Glantz LA, Gilmore JH, Lieberman JA, Jarskog LF (2006) Apoptotic mechanisms and  
22 the synaptic pathology of schizophrenia. *Schizophr Res* 81(1):47–63.
- 23 45. Batalla A, et al. (2015) Apoptotic markers in cultured fibroblasts correlate with brain  
24 metabolites and regional brain volume in antipsychotic-naïve first-episode  
25 schizophrenia and healthy controls. *Transl Psychiatry* 5(8):e626.
- 26 46. Gassó P, et al. (2014) Increased susceptibility to apoptosis in cultured fibroblasts from  
27 antipsychotic-naïve first-episode schizophrenia patients. *J Psychiatr Res* 48(1):94–101.
- 28 47. Benes FM (2004) The role of apoptosis in neuronal pathology in schizophrenia and  
29 bipolar disorder. *Curr Opin Psychiatry* 17(3):189–190.
- 30 48. Györfy BA, et al. (2018) Local apoptotic-like mechanisms underlie complement-  
31 mediated synaptic pruning. *Proc Natl Acad Sci U S A* 115(24):6303–6308.
- 32 49. Steller H (2008) Regulation of apoptosis in *Drosophila*. *Cell Death Differ* 15(7):1132–  
33 1138.
- 34 50. Coe BP, Girirajan S, Eichler EE (2012) A genetic model for neurodevelopmental  
35 disease. *Curr Opin Neurobiol* 22(5):829–836.
- 36 51. Nicholas AK, et al. (2009) The molecular landscape of ASPM mutations in primary  
37 microcephaly. *J Med Genet* 46(4):249–53.
- 38 52. Coba MP, et al. (2018) *Dlgap1* knockout mice exhibit alterations of the postsynaptic  
39 density and selective reductions in sociability. *Sci Rep* 8(1):2281.

- 1 53. Duffney LJ, et al. (2015) Autism-like Deficits in Shank3-Deficient Mice Are Rescued  
2 by Targeting Actin Regulators. *Cell Rep* 11(9):1400–1413.
- 3 54. Park E, et al. (2003) The Shank Family of Postsynaptic Density Proteins Interacts with  
4 and Promotes Synaptic Accumulation of the  $\beta$ PIX Guanine Nucleotide Exchange  
5 Factor for Rac1 and Cdc42. *J Biol Chem* 278(21):19220–19229.
- 6 55. Saiga T, et al. (2009) Fbxo45 forms a novel ubiquitin ligase complex and is required  
7 for neuronal development. *Mol Cell Biol* 29(13):3529–43.
- 8 56. Marlin JW, et al. (2011) Functional PAK-2 knockout and replacement with a caspase  
9 cleavage-deficient mutant in mice reveals differential requirements of full-length  
10 PAK-2 and caspase-activated PAK-2p34. *Mamm Genome* 22(5–6):306–17.
- 11 57. Wang L, Magdaleno S, Tabas I, Jackowski S (2005) Early embryonic lethality in mice  
12 with targeted deletion of the CTP:phosphocholine cytidylyltransferase alpha gene  
13 (Pcyl1a). *Mol Cell Biol* 25(8):3357–63.
- 14 58. Rutkowski TP, et al. (2017) Unraveling the genetic architecture of copy number  
15 variants associated with schizophrenia and other neuropsychiatric disorders. *J*  
16 *Neurosci Res* 95(5):1144–1160.
- 17 59. Budnik V, et al. (1996) Regulation of synapse structure and function by the Drosophila  
18 tumor suppressor gene dlg. *Neuron* 17(4):627–40.
- 19 60. Pabis M, Neufeld N, Shav-Tal Y, Neugebauer KM (2010) Binding properties and  
20 dynamic localization of an alternative isoform of the cap-binding complex subunit  
21 CBP20. *Nucleus* 1(5):412–21.
- 22 61. Maquat LE (2004) Nonsense-mediated mRNA decay: splicing, translation and mRNP  
23 dynamics. *Nat Rev Mol Cell Biol* 5(2):89–99.
- 24 62. Gonatopoulos-Pournatzis T, Cowling VH (2014) Cap-binding complex (CBC).  
25 *Biochem J* 457(2):231–242.
- 26 63. Bilder D, Li M, Perrimon N (2000) Cooperative regulation of cell polarity and growth  
27 by Drosophila tumor suppressors. *Science* 289(5476):113–6.
- 28 64. Humbert P, Russell S, Richardson H (2003) Dlg, Scribble and Lgl in cell polarity, cell  
29 proliferation and cancer. *Bioessays* 25(6):542–53.
- 30 65. Shin E-Y, et al. (2002) Phosphorylation of p85 beta PIX, a Rac/Cdc42-specific  
31 guanine nucleotide exchange factor, via the Ras/ERK/PAK2 pathway is required for  
32 basic fibroblast growth factor-induced neurite outgrowth. *J Biol Chem* 277(46):44417–  
33 30.
- 34 66. Luo S, Rubinsztein DC (2009) Huntingtin promotes cell survival by preventing Pak2  
35 cleavage. *J Cell Sci* 122(6):875–885.
- 36 67. Iyer J, et al. (2018) Pervasive genetic interactions modulate neurodevelopmental  
37 defects of the autism-associated 16p11.2 deletion in Drosophila melanogaster. *Nat*  
38 *Commun* 9(1):2548.
- 39 68. Chen X, et al. (2008) MEGF10 Association with Schizophrenia. *Biol Psychiatry*  
40 63(5):441–448.
- 41 69. Chen X, et al. (2009) Apoptotic Engulfment Pathway and Schizophrenia. *PLoS One*

- 1 4(9):e6875.
- 2 70. Rees E, et al. (2014) Analysis of copy number variations at 15 schizophrenia-  
3 associated loci. *Br J Psychiatry* 204(02):108–114.
- 4 71. McCarthy SE, et al. (2009) Microduplications of 16p11.2 are associated with  
5 schizophrenia. *Nat Genet* 41(11):1223–1227.
- 6 72. Moreno-De-Luca D, et al. (2010) Deletion 17q12 is a recurrent copy number variant  
7 that confers high risk of autism and schizophrenia. *Am J Hum Genet* 87(5):618–30.
- 8 73. Silver DL, et al. (2010) The exon junction complex component Magoh controls brain  
9 size by regulating neural stem cell division. *Nat Neurosci* 13(5):551–558.
- 10 74. Poulton CJ, et al. (2011) Microcephaly with simplified gyration, epilepsy, and infantile  
11 diabetes linked to inappropriate apoptosis of neural progenitors. *Am J Hum Genet*  
12 89(2):265–76.
- 13 75. Faheem M, et al. (2015) Molecular genetics of human primary microcephaly: an  
14 overview. *BMC Med Genomics* 8(S1):S4.
- 15 76. Frappart P-O, et al. (2005) An essential function for NBS1 in the prevention of ataxia  
16 and cerebellar defects. *Nat Med* 11(5):538–544.
- 17 77. Hu Y, et al. (2011) An integrative approach to ortholog prediction for disease-focused  
18 and other functional studies. *BMC Bioinformatics* 12(1):357.
- 19 78. Dietzl G, et al. (2007) A genome-wide transgenic RNAi library for conditional gene  
20 inactivation in *Drosophila*. *Nature* 448(7150):151–6.
- 21 79. Green EW, Fedele G, Giorgini F, Kyriacou CP (2014) A *Drosophila* RNAi collection  
22 is subject to dominant phenotypic effects. *Nat Methods* 11(3):222–3.
- 23 80. Chintapalli VR, Wang J, Dow JAT (2007) Using FlyAtlas to identify better *Drosophila*  
24 melanogaster models of human disease. *Nat Genet* 39(6):715–720.
- 25 81. Graveley BR, et al. (2011) The developmental transcriptome of *Drosophila*  
26 melanogaster. *Nature* 471(7339):473–479.
- 27 82. Ye J, et al. (2012) Primer-BLAST: A tool to design target-specific primers for  
28 polymerase chain reaction. *BMC Bioinformatics* 13(1):134.
- 29 83. Livak KJ, Schmittgen TD (2001) Analysis of Relative Gene Expression Data Using  
30 Real-Time Quantitative PCR and the  $2^{-\Delta\Delta CT}$  Method. *Methods* 25(4):402–408.
- 31 84. Schneider CA, Rasband WS, Eliceiri KW (2012) NIH Image to ImageJ: 25 years of  
32 image analysis. *Nat Methods* 9(7):671–5.
- 33 85. Bolger AM, Lohse M, Usadel B (2014) Trimmomatic: a flexible trimmer for Illumina  
34 sequence data. *Bioinformatics* 30(15):2114–2120.
- 35 86. Kim D, et al. (2013) TopHat2: accurate alignment of transcriptomes in the presence of  
36 insertions, deletions and gene fusions. *Genome Biol* 14(4):R36.
- 37 87. Anders S, Pyl PT, Huber W (2015) HTSeq—a Python framework to work with high-  
38 throughput sequencing data. *Bioinformatics* 31(2):166–169.
- 39 88. Robinson MD, McCarthy DJ, Smyth GK (2010) edgeR: a Bioconductor package for

- 1 differential expression analysis of digital gene expression data. *Bioinformatics*  
2 26(1):139–140.
- 3 89. Mi H, et al. (2017) PANTHER version 11: expanded annotation data from Gene  
4 Ontology and Reactome pathways, and data analysis tool enhancements. *Nucleic Acids*  
5 *Res* 45(D1):D183–D189.
- 6 90. Dougherty JD, Schmidt EF, Nakajima M, Heintz N (2010) Analytical approaches to  
7 RNA profiling data for the identification of genes enriched in specific cells. *Nucleic*  
8 *Acids Res* 38(13):4218–4230.
- 9 91. Miller JA, et al. (2014) Transcriptional landscape of the prenatal human brain. *Nature*  
10 508(7495):199–206.
- 11 92. Sive HL, Grainger RM, Harland RM (2010) Microinjection of *Xenopus* Oocytes. *Cold*  
12 *Spring Harb Protoc* 2010(12):pdb.prot5536.
- 13 93. Lowery LA, Faris AER, Stout A, Van Vactor D (2012) Neural Explant Cultures from  
14 *Xenopus laevis*. *J Vis Exp* (68):e4232.
- 15 94. Nieuwkoop PD, Faber J (1994) *Normal table of Xenopus laevis (Daudin) : a*  
16 *systematical and chronological survey of the development from the fertilized egg till*  
17 *the end of metamorphosis* (Garland Pub, New York).
- 18 95. Carbon S, et al. (2009) AmiGO: online access to ontology and annotation data.  
19 *Bioinformatics* 25(2):288–289.
- 20 96. Karimi K, et al. (2018) Xenbase: a genomic, epigenomic and transcriptomic model  
21 organism database. *Nucleic Acids Res* 46(D1):D861–D868.
- 22



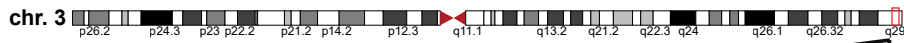

14 *Drosophila* homologs  
3 *Xenopus* homologs

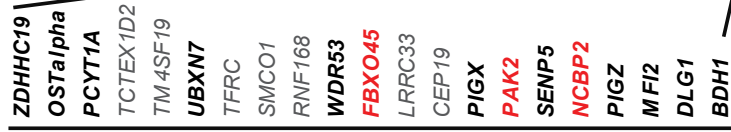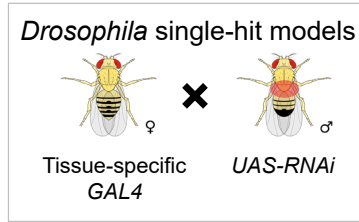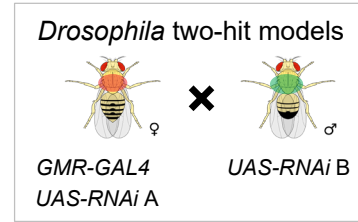

Global phenotype screening

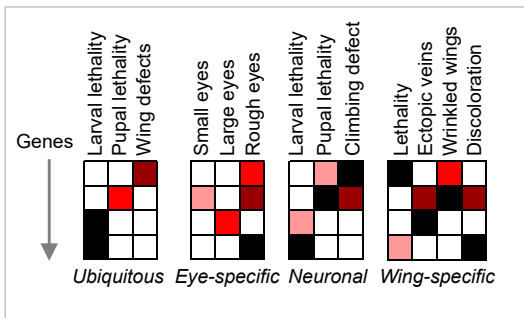

Pairwise interaction screening

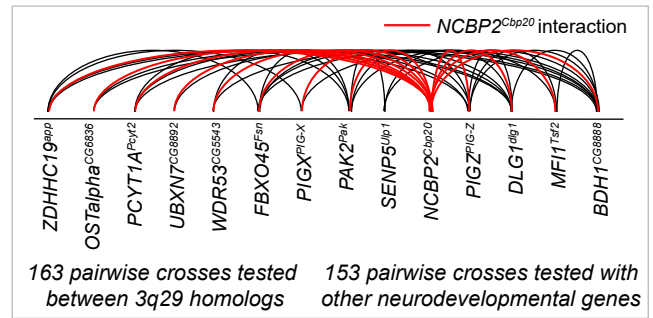

Neuronal phenotypes

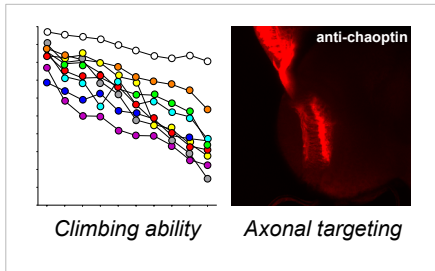

Cellular phenotypes

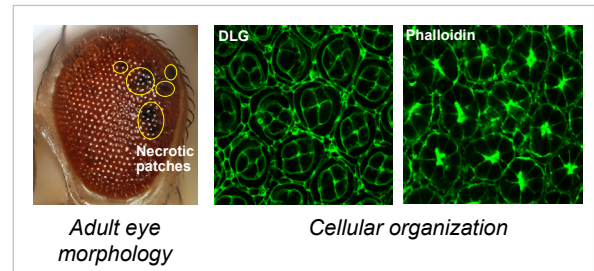

Apoptosis and cell cycle mechanisms

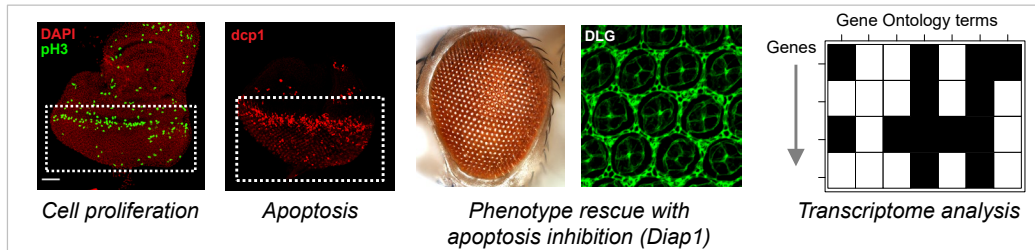

Validation in *Xenopus* models

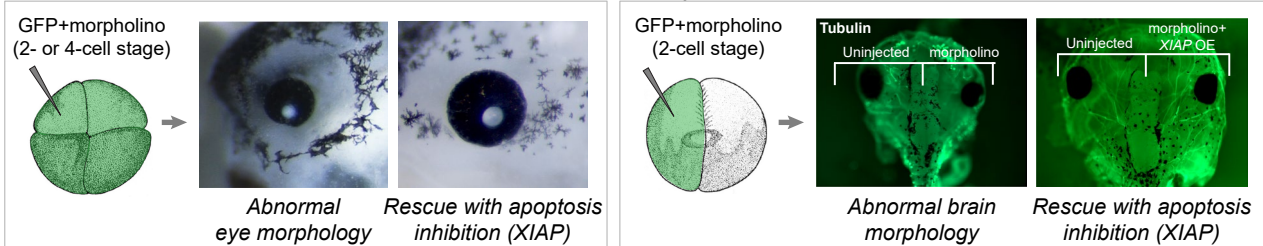

**Figure 1.** Strategy for identifying cellular phenotypes and genetic interactions of 3q29 homologs. We first knocked down individual or pairs of 14 homologs of 3q29 genes in *Drosophila* using tissue-specific RNAi. After screening for global phenotypes of single homologs, we tested 316 pairwise interactions using the fly eye system, and found that *NCBP2<sup>Cbp20</sup>* enhanced the phenotypes of other 3q29 homologs and interacted with other neurodevelopmental genes outside of the 3q29 region. Next, we assayed for deeper cellular and neuronal phenotypes of single-hit and two-hit flies, and found cellular defects that identified apoptosis and cell cycle as candidate mechanisms for pathogenicity of the deletion. We confirmed our results by rescuing cellular phenotypes with overexpression of the apoptosis inhibitor *Diap1* as well as by analyzing genes differentially expressed with knockdown of 3q29 homologs. Finally, we tested three 3q29 homologs in the *Xenopus laevis* vertebrate model system by injecting two- or four-cell stage embryos with GFP and 3q29 morpholinos (MOs) to observe abnormal eye morphology, as well as injecting one cell with GFP and 3q29 MOs at the two-cell stage to observe abnormal brain morphology. We found similar developmental defects to those observed in *Drosophila*, including increased apoptosis that was enhanced with pairwise knockdown of 3q29 homologs and rescued with overexpression of the apoptosis inhibitor *XIAP*. *X. laevis* embryo diagrams were produced by Nieuwkoop and Faber (94) and provided by Xenbase (96).

**A**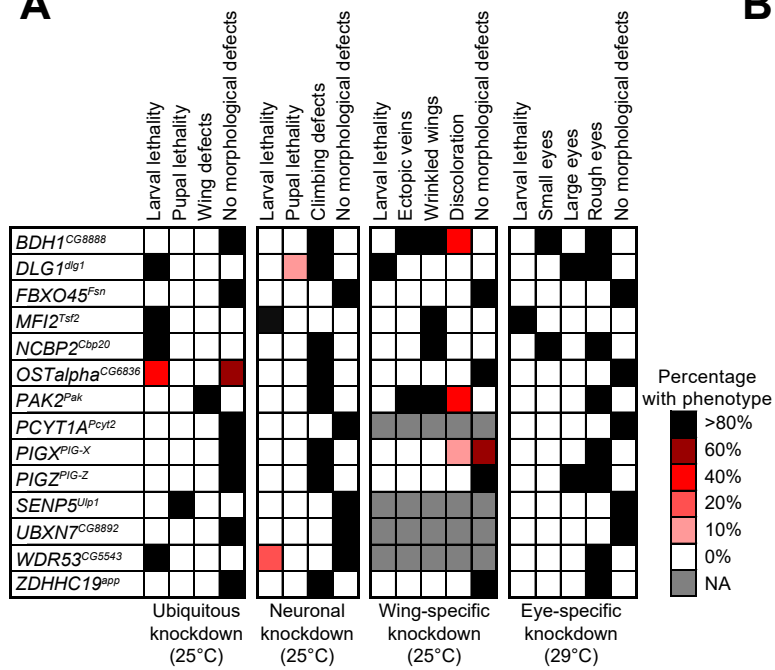**B**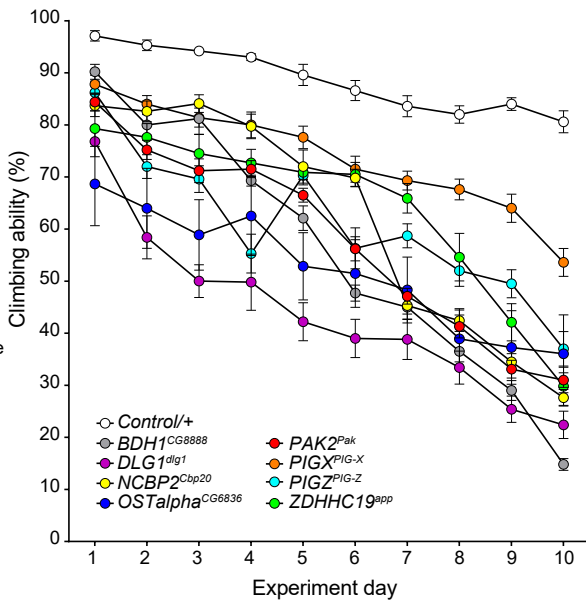**C**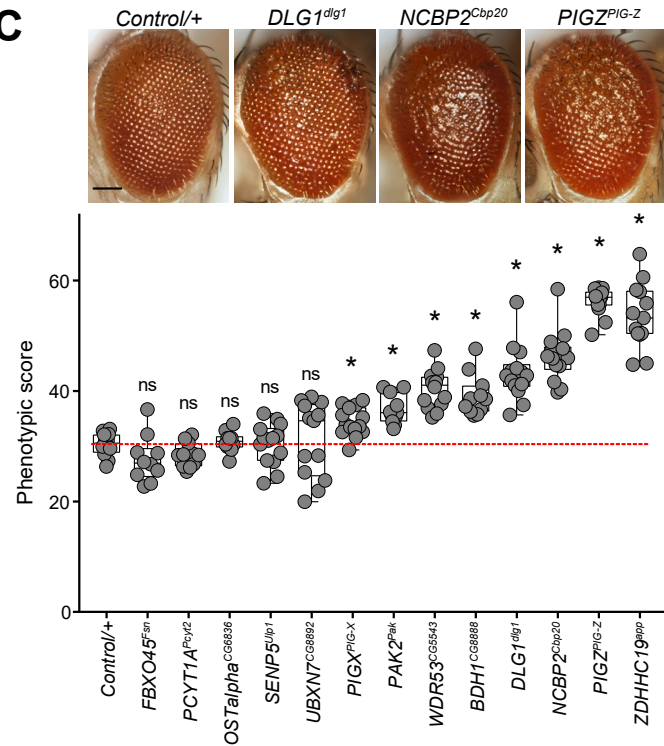**D**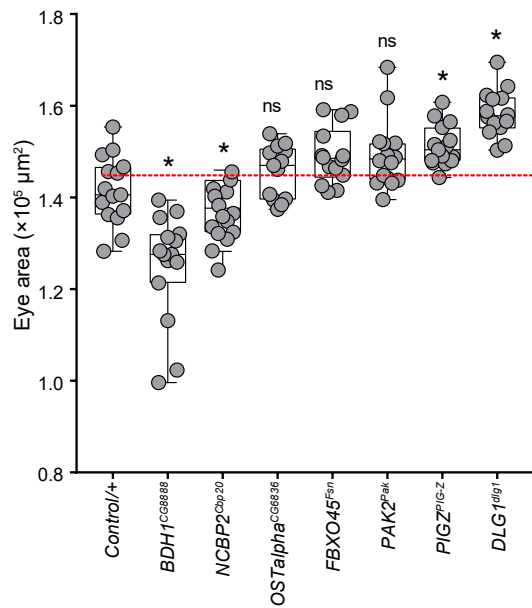**E**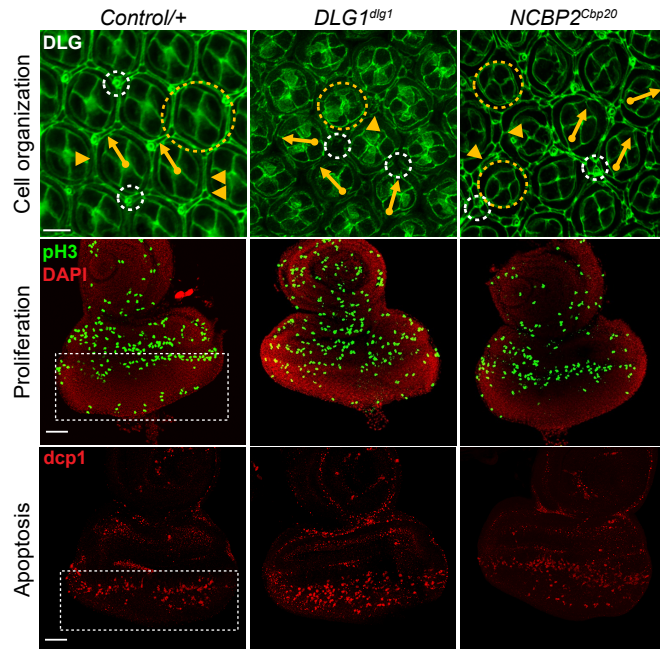**F**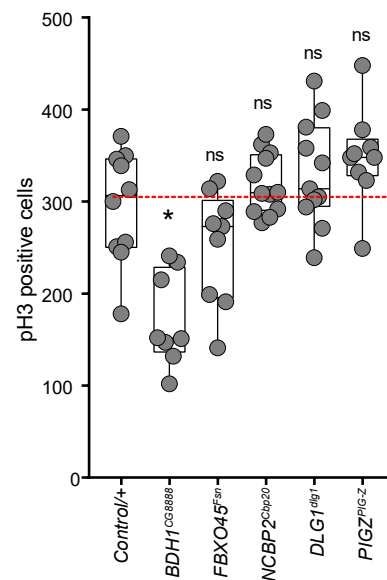**G**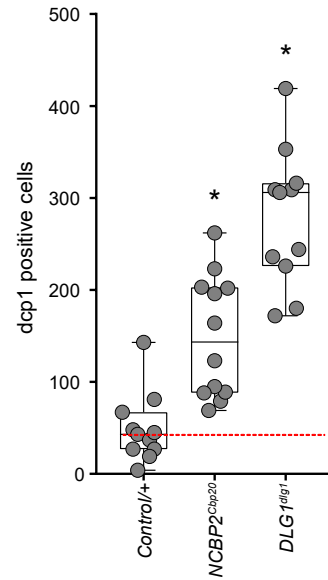



**Figure 2.** Neurodevelopmental defects in flies with knockdown of individual 3q29 homologs. **(A)** Percentage of 3q29 homologs with tissue-specific knockdown that manifest lethality or developmental phenotypes. **(B)** Eight 3q29 homologs with pan-neuronal knockdown showed defects in climbing ability over ten days (two-way ANOVA,  $p < 2.2 \times 10^{-16}$ ,  $df = 8$ ,  $F = 33.962$ ). Data represented show mean  $\pm$  standard deviation of 10 independent groups of 10 flies for each homolog. **(C)** Representative brightfield adult eye images of single-hit flies with eye-specific *GMR-GAL4;UAS-Dicer2* (scale bar = 100  $\mu$ m) show rough eye phenotypes due to knockdown of 3q29 homologs. The boxplot shows *Flynotyper*-derived phenotypic scores for eyes with knockdown of 3q29 homologs ( $n = 10-14$ ,  $*p < 0.05$ , one-tailed Mann–Whitney test). **(D)** Boxplot of adult eye area in 3q29 single-hit flies with *GMR-GAL4* ( $n = 13-16$ ,  $*p < 0.05$ , two-tailed Mann–Whitney test). **(E)** Confocal images of pupal eyes (scale bar = 5  $\mu$ m) stained with anti-DLG (top) and larval eye discs (scale bar = 30  $\mu$ m) stained with anti-pH3 (middle) and anti-dcp1 (bottom) illustrate cellular defects posterior to the morphogenetic furrow (white box) upon knockdown of select 3q29 homologs. Yellow circles in DLG images indicate cone cell defects, white circles indicate bristle cell defects, yellow arrows indicate rotation defects, and yellow arrowheads indicate secondary cell defects. **(F)** Boxplot of pH3-positive cells in larval eye discs of 3q29 knockdown flies ( $n = 9-12$ ,  $*p < 0.05$ , two-tailed Mann–Whitney test). **(G)** Boxplot of dcp1-positive cells in larval eye discs of 3q29 knockdown flies ( $n = 11-12$ ,  $*p < 0.05$ , two-tailed Mann–Whitney test). All boxplots indicate median (center line), 25th and 75th percentiles (bounds of box), and minimum and maximum (whiskers).

**A**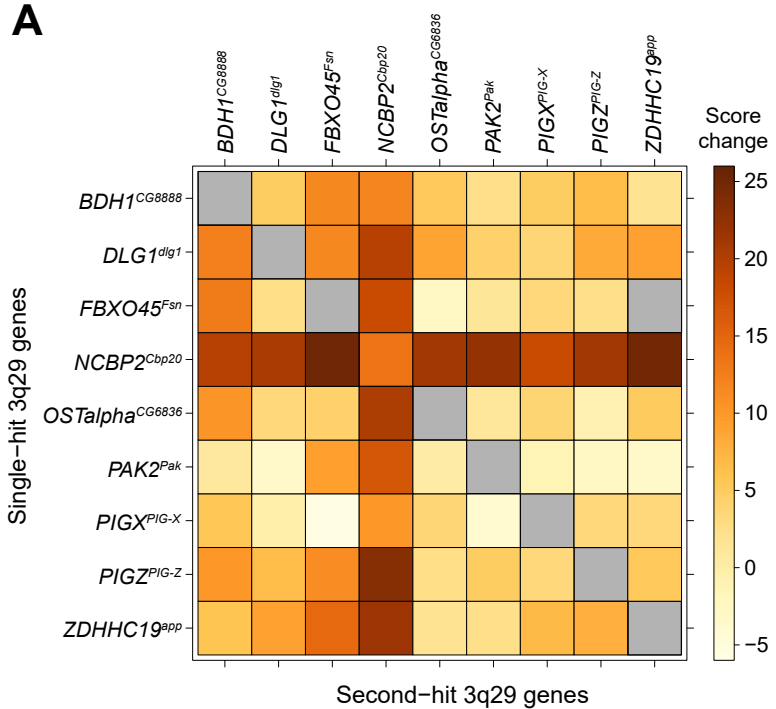**B**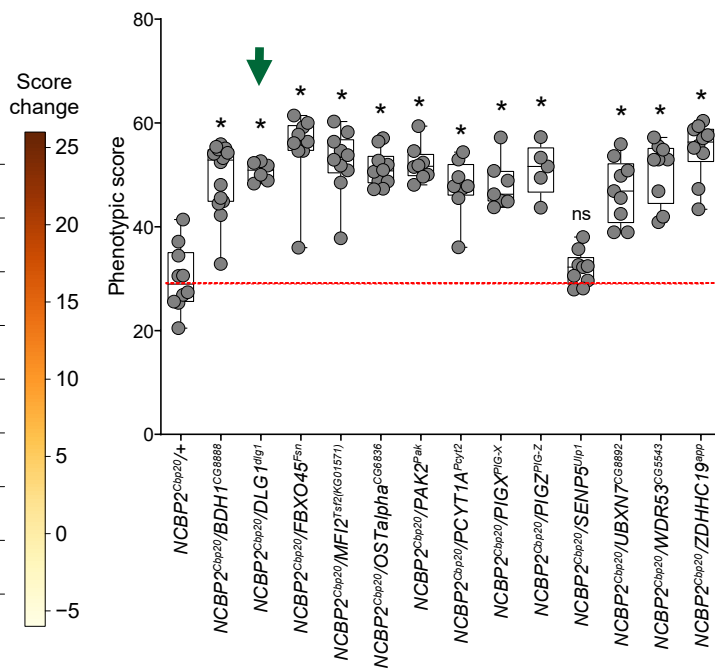**C**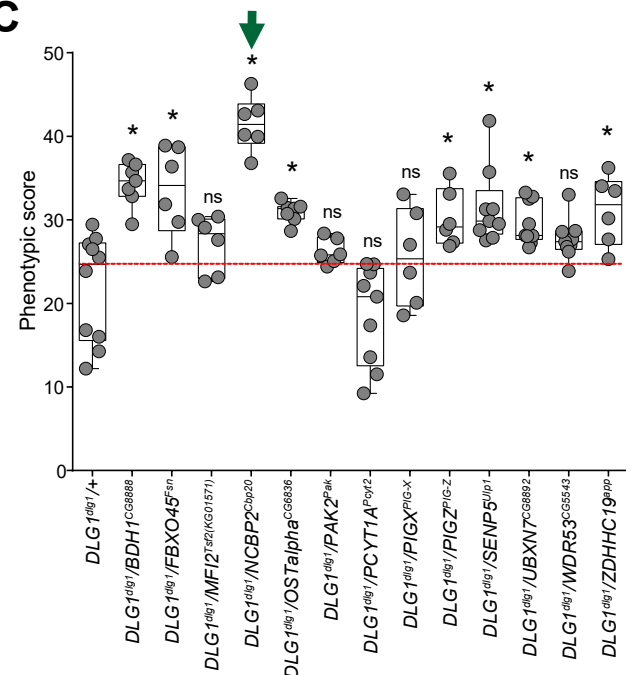**D**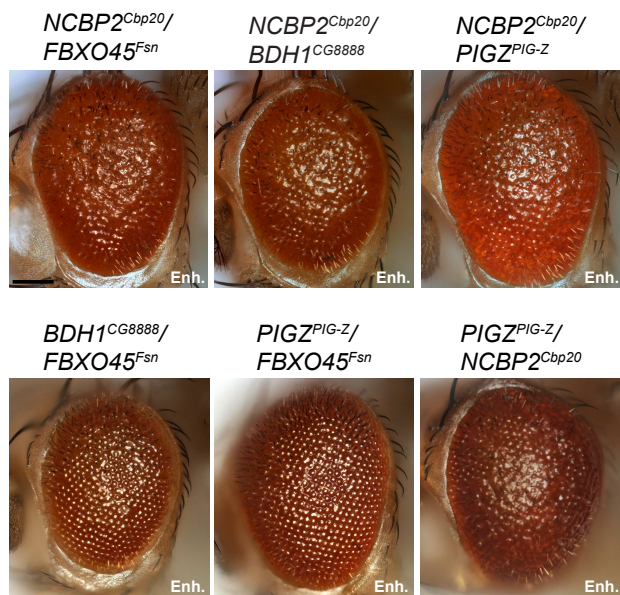**E**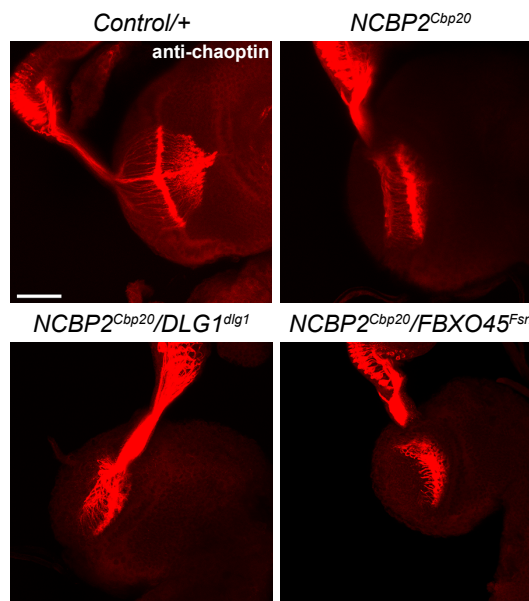**F**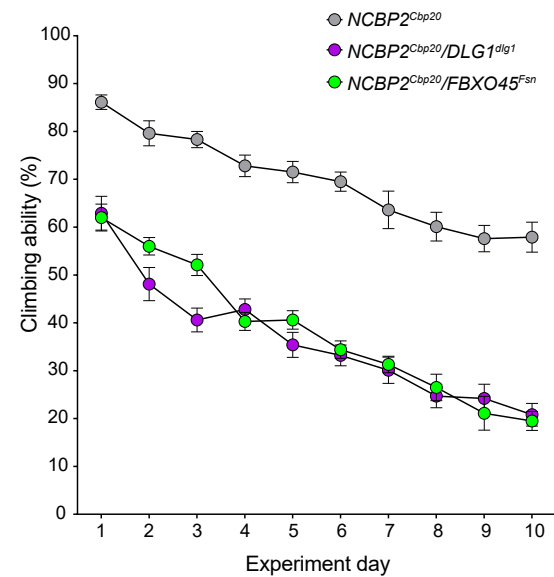

**Figure 3.** Screening for pairwise interactions of 3q29 homologs in the *Drosophila* eye and nervous system. **(A)** Heatmap showing average changes in phenotypic scores for pairwise interactions of 3q29 homologs in the adult eye, compared with single-hit recombined lines. Gray boxes indicate crosses without available data. Boxplots of phenotypic scores for pairwise knockdown of **(B)** *NCBP2<sup>Cbp20</sup>* and **(C)** *DLG1<sup>dlg1</sup>* with other 3q29 homologs are shown (n = 5–14, \*p < 0.05, two-tailed Mann–Whitney test). Green arrows indicate a pair of reciprocal lines showing enhanced phenotypes compared with their respective single-hit controls. **(D)** Representative brightfield adult eye images of flies with pairwise knockdown of 3q29 homologs (scale bar = 100 μm) show enhancement (Enh.) of rough eye phenotypes compared with single-hit recombined lines. **(E)** Representative confocal images of larval eye discs stained with anti-chaoptin (scale bar = 30 μm) illustrate enhanced defects in axonal targeting from the retina to the optic lobes of the brain with eye-specific knockdown of *NCBP2<sup>Cbp20</sup>/DLG1<sup>dlg1</sup>* and *NCBP2<sup>Cbp20</sup>/FBXO45<sup>Fsn</sup>* compared with *NCBP2<sup>Cbp20</sup>* knockdown. **(F)** Flies with pan-neuronal pairwise knockdown of 3q29 homologs showed enhanced defects in climbing ability over ten days (two-way ANOVA, p < 5.88 × 10<sup>-4</sup>, df = 2, F = 7.630) compared with *NCBP2<sup>Cbp20</sup>* knockdown. Data represented show mean ± standard deviation of 10 independent groups of 10 flies for each line tested. All boxplots indicate median (center line), 25th and 75th percentiles (bounds of box), and minimum and maximum (whiskers).

**A**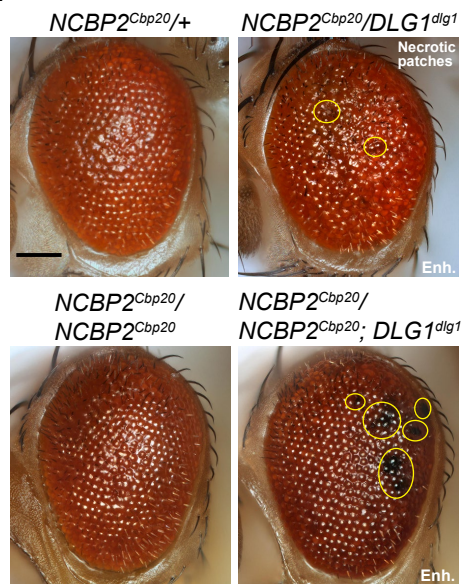**B**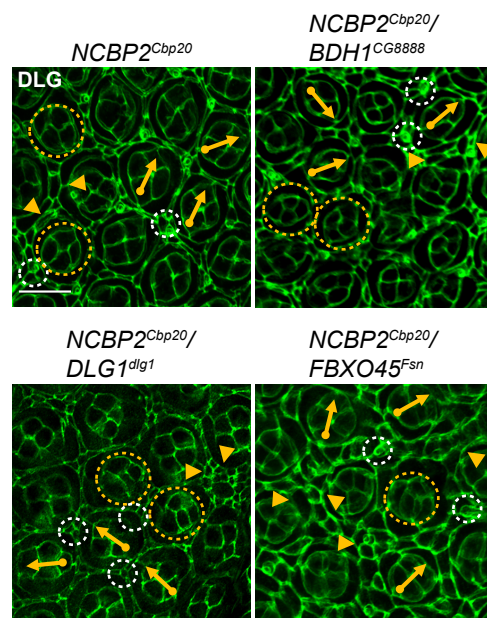**C**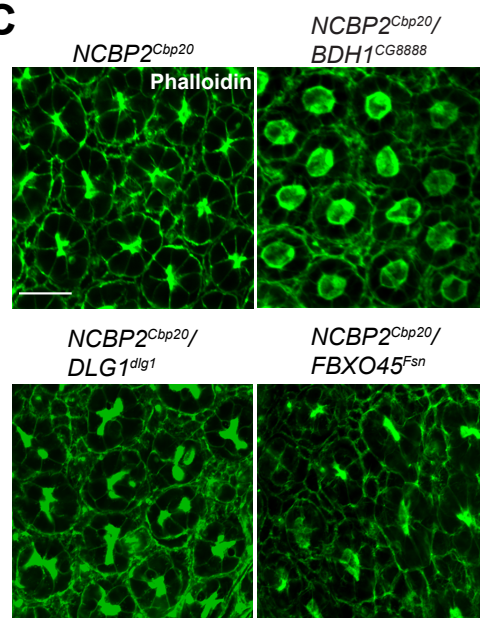**D**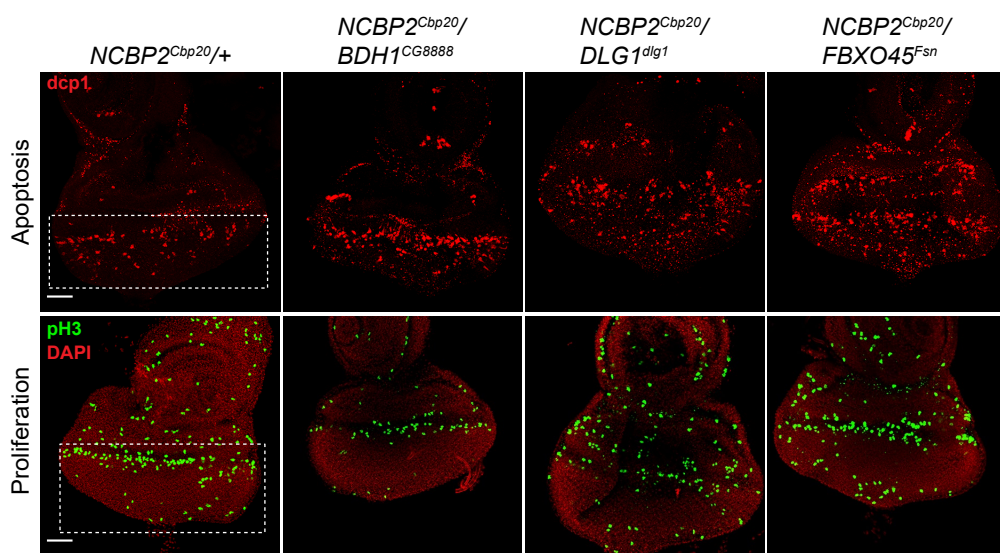**E**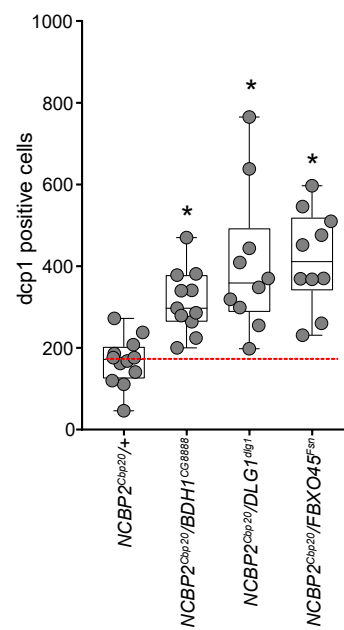**F**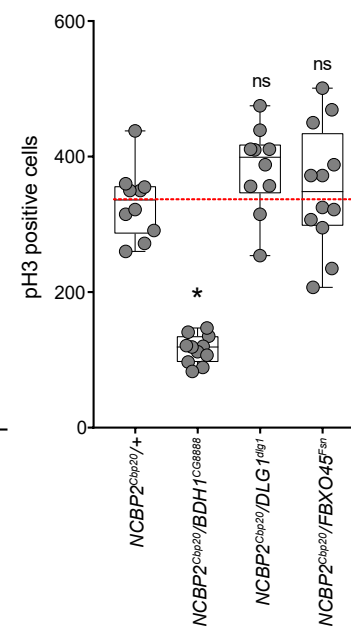

**Figure 4.** Cellular phenotypes with pairwise knockdown of 3q29 homologs. **(A)** Representative brightfield adult eye images (scale bar = 100  $\mu\text{m}$ ) show that knockdown of *DLGI<sup>dlg1</sup>* enhanced the rough eye phenotype and necrotic patches (yellow circles) of both heterozygous and homozygous knockdowns of *NCBP2<sup>Cbp20</sup>*. **(B)** Representative confocal images of pupal eyes (scale bar = 5  $\mu\text{m}$ ) stained with anti-DLG illustrate enhanced defects in ommatidial organization upon concomitant knockdown of *NCBP2<sup>Cbp20</sup>* with other 3q29 homologs compared with *NCBP2<sup>Cbp20</sup>* knockdown. **(C)** Representative confocal images of pupal eyes (scale bar = 5  $\mu\text{m}$ ) stained with Phalloidin illustrate enhanced defects in photoreceptor cell count and organization upon concomitant knockdown of *NCBP2<sup>Cbp20</sup>* and other 3q29 homologs compared with *NCBP2<sup>Cbp20</sup>* knockdown. **(D)** Representative confocal images of larval eye discs (scale bar = 30  $\mu\text{m}$ ) stained with anti-dcp1 (top) and anti-pH3 (bottom) show enhanced defects in apoptosis and cell proliferation with pairwise knockdown of *NCBP2<sup>Cbp20</sup>* and other 3q29 homologs compared with *NCBP2<sup>Cbp20</sup>* knockdown. **(E)** Boxplot of dcp1-positive cells in the larval eye discs of 3q29 two-hit knockdown flies (n = 10–11, \*p < 0.05, two-tailed Mann–Whitney test). **(F)** Boxplot of pH3-positive cells in the larval eye discs of 3q29 two-hit knockdown flies (n = 10–12, \*p < 0.05, two-tailed Mann–Whitney test). All boxplots indicate median (center line), 25th and 75th percentiles (bounds of box), and minimum and maximum (whiskers).



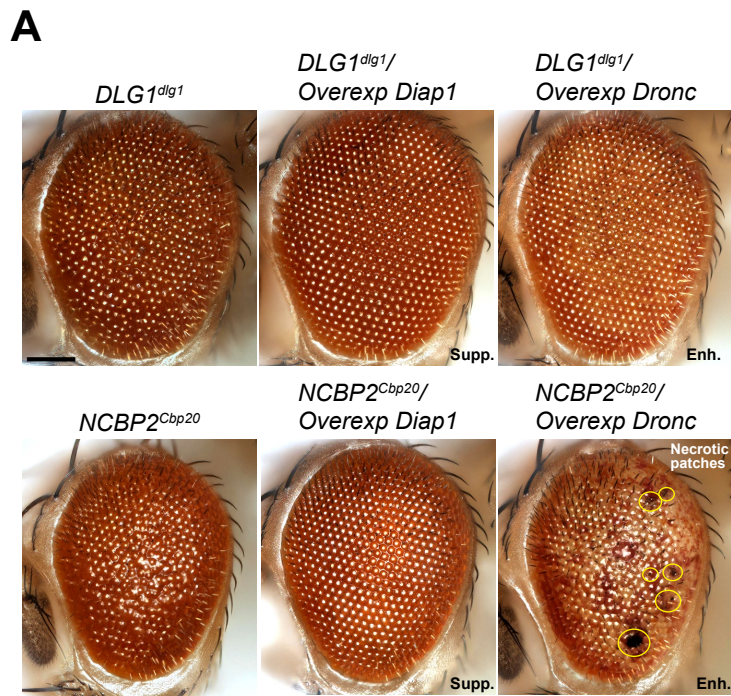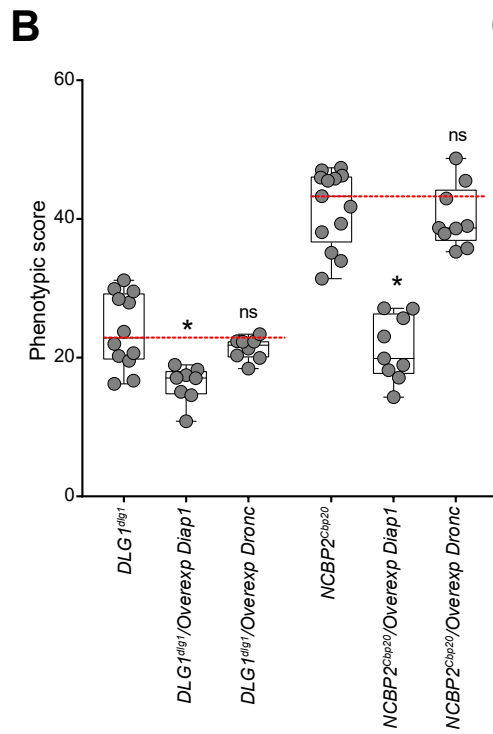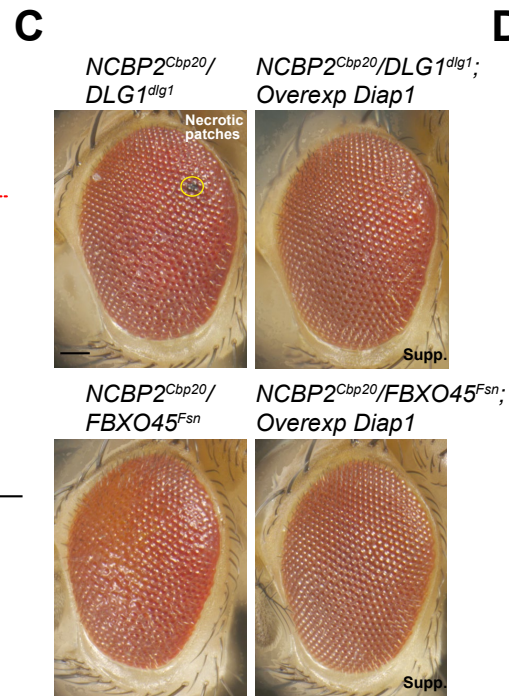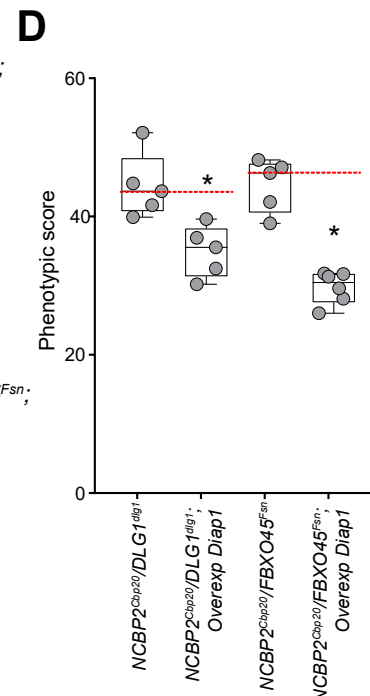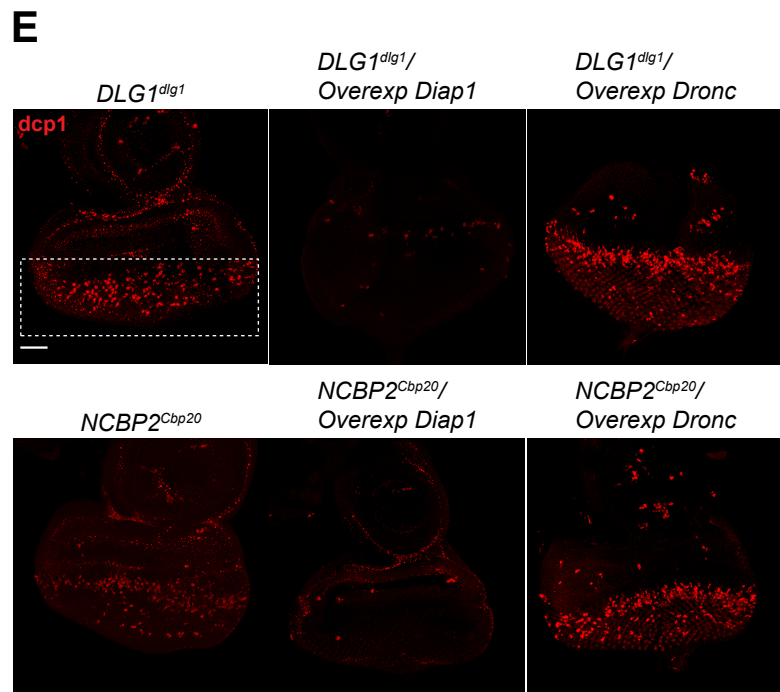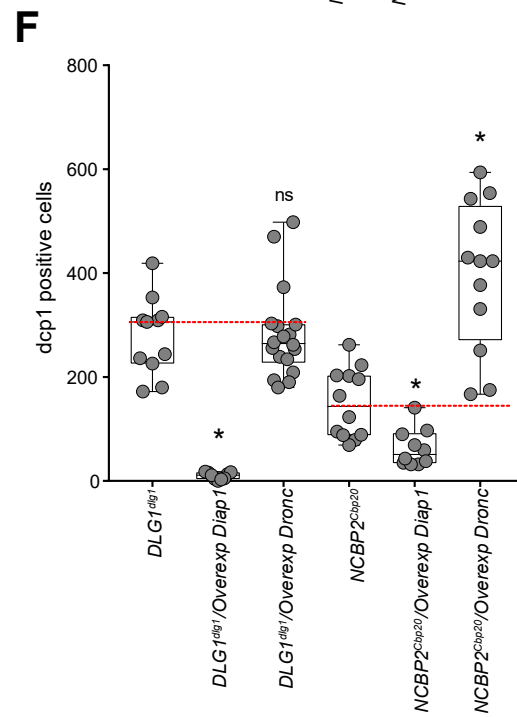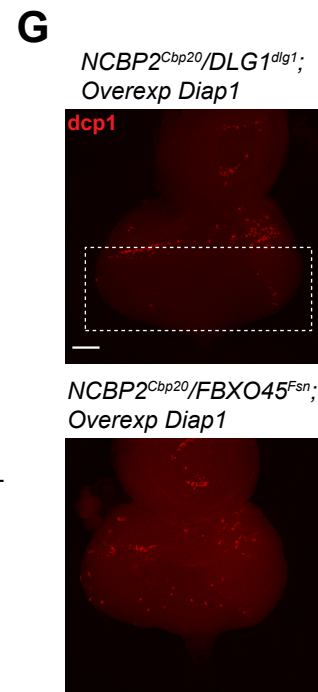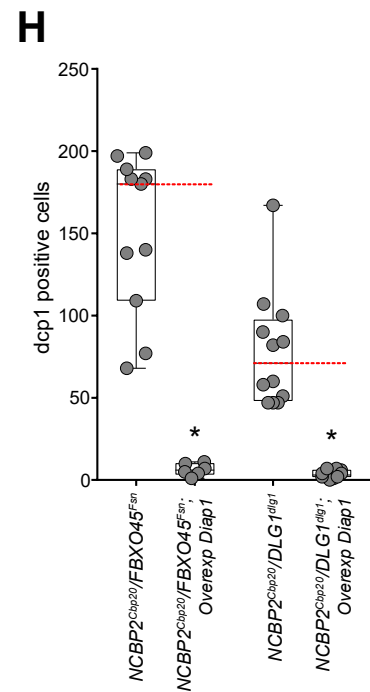



**Figure 5.** Rescue of cellular phenotypes of 3q29 knockdown flies with overexpression of the apoptosis inhibitor *Diap1*. **(A)** Representative brightfield adult eye images (scale bar = 100  $\mu\text{m}$ ) show suppression (Supp.) of rough eye phenotypes for *NCBP2<sup>Cbp20</sup>* and *DLG1<sup>dlg1</sup>* knockdown flies with overexpression of *Diap1*, as well as enhanced (Enh.) phenotypes with overexpression of caspase-9 homolog *Dronc*. **(B)** Boxplot of phenotypic scores for single-hit 3q29 knockdown flies with overexpression of *Diap1* and *Dronc* (n = 8–9, \*p < 0.05, two-tailed Mann–Whitney test). **(C)** Representative brightfield adult eye images (scale bar = 100  $\mu\text{m}$ ) show suppression (Supp.) of rough eye phenotypes and necrotic patches in *NCBP2<sup>Cbp20</sup>/DLG1<sup>dlg1</sup>* and *NCBP2<sup>Cbp20</sup>/FBXO45<sup>Fsn</sup>* flies with *Diap1* overexpression. **(D)** Boxplot of phenotypic scores in two-hit knockdown flies with overexpression of *Diap1* (n = 5–6, \*p < 0.05, two-tailed Mann–Whitney test). **(E)** Larval eye discs (scale bar = 30  $\mu\text{m}$ ) stained with anti-dcp1 show rescue of apoptosis phenotypes observed in *NCBP2<sup>Cbp20</sup>* and *DLG1<sup>dlg1</sup>* knockdown flies with *Diap1* overexpression as well as enhanced phenotypes with *Dronc* overexpression. **(F)** Boxplot of dcp1-positive cells in the larval eye discs of 3q29 single-hit knockdown flies with *Diap1* and *Dronc* overexpression (n = 9–18, \*p < 0.05, two-tailed Mann–Whitney test). **(G)** Larval eye discs (scale bar = 30  $\mu\text{m}$ ) stained with anti-dcp1 show rescue of apoptosis phenotypes observed in two-hit knockdown flies with *Diap1* overexpression. **(H)** Boxplot of dcp1-positive cells in the larval eye discs of 3q29 two-hit knockdown flies with *Diap1* overexpression (n = 6–10, \*p < 0.05, two-tailed Mann–Whitney test). All boxplots indicate median (center line), 25th and 75th percentiles (bounds of box), and minimum and maximum (whiskers).

**A**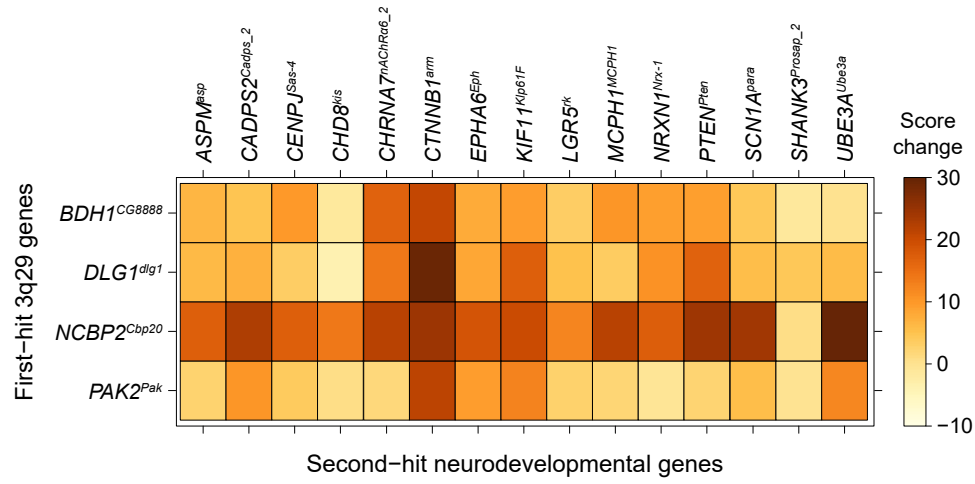**B**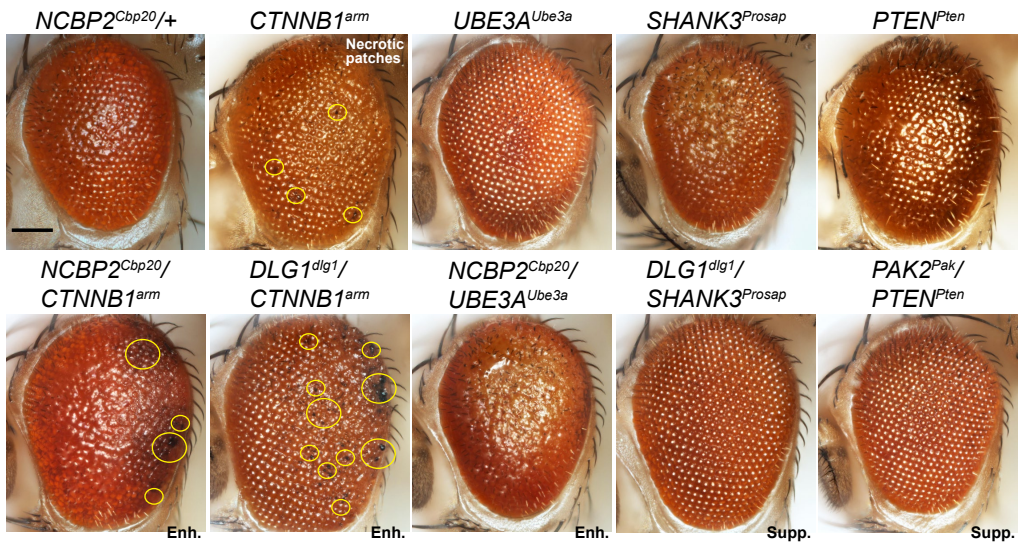

**Figure 6.** Interactions between 3q29 homologs and other neurodevelopmental genes. **(A)** Heatmap showing the average changes in phenotypic scores for the pairwise knockdown of 3q29 homologs in the adult eye and other neurodevelopmental genes, compared with single-hit recombined lines. **(B)** Representative brightfield adult eye images of flies with pairwise knockdown of 3q29 homologs and other neurodevelopmental genes (scale bar = 100  $\mu$ m) show enhancement (Enh.) or suppression (Supp.) of rough eye phenotypes and necrotic patches compared with the single-hit genes.

**A**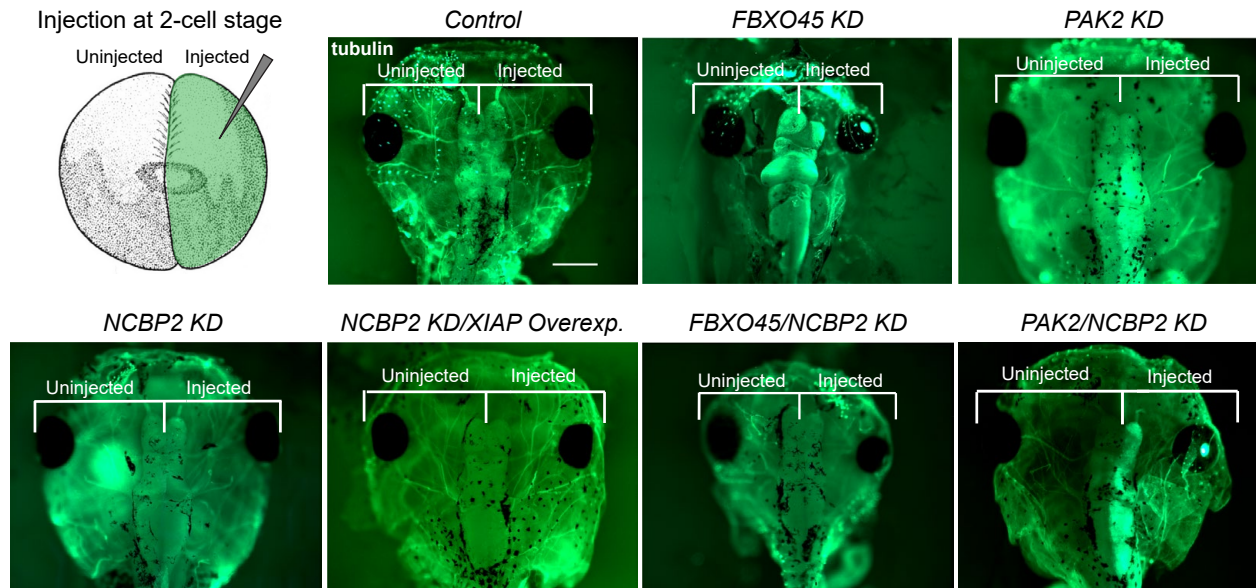**B**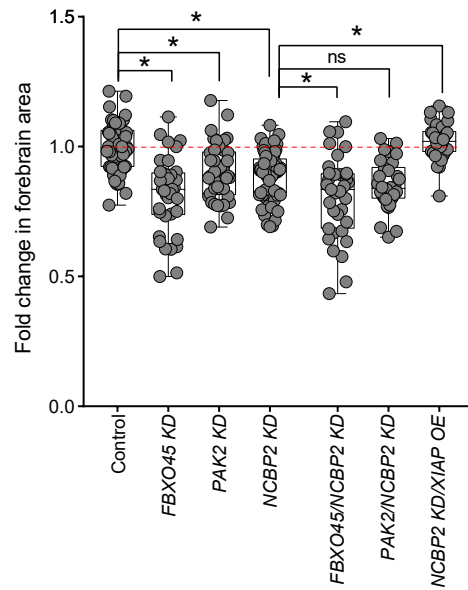**C**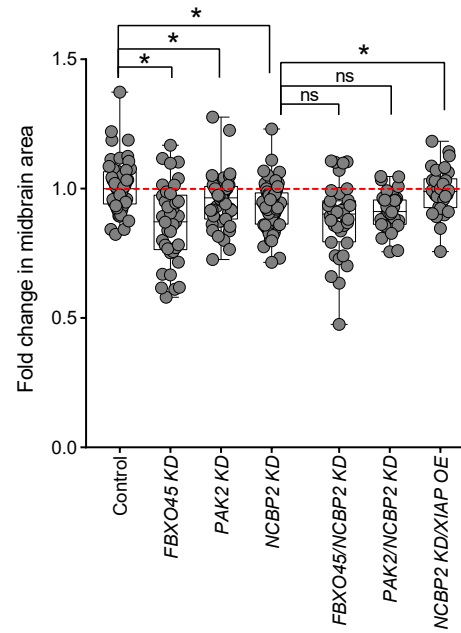**D**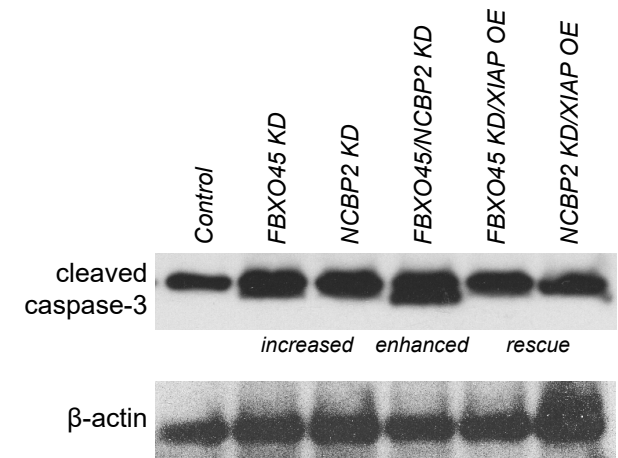**E**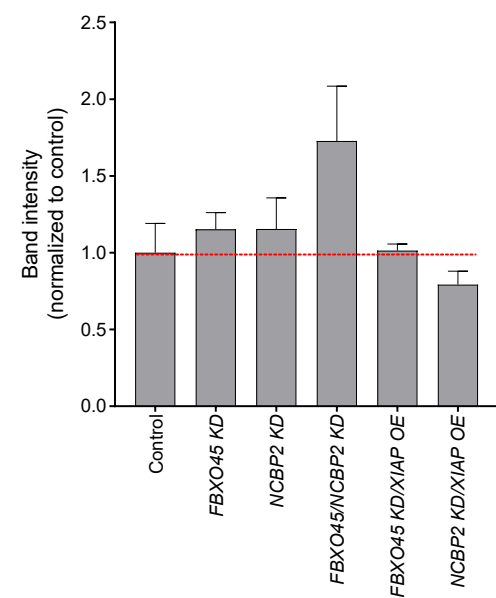

**Figure 7.** Developmental phenotypes observed with knockdown of 3q29 homologs in *X. laevis* models. **(A)** To study brain morphology upon knockdown of 3q29 homologs, one cell in a two-cell embryo was injected with MO for the 3q29 homolog(s) while the other cell remained uninjected. Representative images of stage 47 *X. laevis* tadpoles with MO knockdown of *NCBP2* (scale bar = 500  $\mu$ m) show morphological defects and decreased size compared with control tadpoles. Pairwise knockdown of *FBXO45* and *NCBP2* enhanced these phenotypes, which were also rescued with overexpression of *XIAP*. **(B)** Box plot of forebrain area in *X. laevis* models with knockdown of 3q29 homologs, normalized to controls (n = 30–63, \*p < 0.05, two-tailed Welch's T-test). **(C)** Box plot of midbrain area in *X. laevis* models with knockdown of 3q29 homologs, normalized to controls (n = 30–63, \*p < 0.05, two-tailed Welch's T-test). **(D)** Western blot analysis of *X. laevis* whole embryos show increased levels of cleaved caspase-3 with knockdown of 3q29 homologs, including enhanced caspase-3 levels with two-hit knockdown of 3q29 homologs and rescued levels with *XIAP* overexpression.  $\beta$ -actin was used as a loading control on the same blot. Western blot images shown are cropped; the full blots are provided in **Figure S13C**. **(E)** Quantification of Western blot band intensity for caspase-3 levels, normalized to the loading control. All boxplots indicate median (center line), 25th and 75th percentiles (bounds of box), and minimum and maximum (whiskers). *X. laevis* embryo diagrams were produced by Nieuwkoop and Farber (94) and provided by Xenbase (96).

**Table 1.** Summary of phenotypes for select 3q29 knockdown experiments show widespread defects due to disruption of apoptosis and cell cycle functions.

| Experiment                             |                              | Single-hit models<br>(compared with controls) |                                      | Two-hit models<br>(compared with <i>NCBP2<sup>Cbp20</sup></i> ) |                                                        |                                                         |                                         |                                       |
|----------------------------------------|------------------------------|-----------------------------------------------|--------------------------------------|-----------------------------------------------------------------|--------------------------------------------------------|---------------------------------------------------------|-----------------------------------------|---------------------------------------|
| Phenotype                              | Assay                        | <i>NCBP2<sup>Cbp20</sup></i>                  | <i>DLG1<sup>dlg1</sup></i>           | <i>NCBP2<sup>Cbp20</sup>/<br/>DLG1<sup>dlg1</sup></i>           | <i>NCBP2<sup>Cbp20</sup>/<br/>FBXO45<sup>Fsn</sup></i> | <i>NCBP2<sup>Cbp20</sup>/<br/>BDHI<sup>CG8888</sup></i> | <i>NCBP2<sup>Cbp20</sup>/<br/>Diap1</i> | <i>DLG1<sup>dlg1</sup>/<br/>Diap1</i> |
| Adult eye morphology                   | Rough eye phenotype          | Rough eye                                     | Rough eye                            | Enhanced rough eye                                              | Enhanced rough eye                                     | Enhanced rough eye                                      | Rescue                                  | Rescue                                |
|                                        | Necrotic patches             | None<br>(Present in homozygous KD)            | None                                 | Yes<br>(more severe in homozygous KD)                           | Yes                                                    | None                                                    | None                                    | None                                  |
|                                        | Eye area                     | Decreased area                                | Increased area                       | NA                                                              | NA                                                     | NA                                                      | Rescue                                  | Rescue                                |
| Neuronal phenotypes                    | Negative geotaxis            | Climbing defects                              | Climbing defects                     | Enhanced climbing defects                                       | Enhanced climbing defects                              | NA                                                      | NA                                      | NA                                    |
|                                        | Axonal targeting             | Axon targeting defects                        | Axon targeting defects               | Enhanced targeting defects                                      | Enhanced targeting defects                             | NA                                                      | Rescue                                  | Rescue                                |
| Cell organization (pupal eye)          | DLG staining                 | Cellular defects                              | Cellular defects                     | Enhanced cellular defects                                       | Enhanced cellular defects                              | Enhanced cellular defects                               | Rescue                                  | Rescue                                |
|                                        | Phalloidin staining          | Loss of photoreceptors                        | Loss of photoreceptors               | No change                                                       | Enhanced photoreceptor loss                            | Enhanced photoreceptor loss                             | Rescue                                  | Rescue                                |
| Cell cycle (larval eye disc)           | pH3 staining                 | No change                                     | No change                            | No change                                                       | No change                                              | Decreased proliferation                                 | NA                                      | NA                                    |
|                                        | BrdU staining                | No change                                     | Increased proliferation              | NA                                                              | NA                                                     | NA                                                      | NA                                      | NA                                    |
| Apoptosis (larval eye disc)            | dcp1 staining                | Increased apoptosis                           | Increased apoptosis                  | Increased apoptosis                                             | Increased apoptosis                                    | Increased apoptosis                                     | Rescue                                  | Rescue                                |
|                                        | TUNEL assay                  | Increased apoptosis                           | Increased apoptosis                  | Increased apoptosis                                             | Increased apoptosis                                    | Increased apoptosis                                     | Rescue                                  | Rescue                                |
| Cellular phenotypes (larval wing disc) | pH3 staining                 | Decreased proliferation                       | Increased proliferation              | NA                                                              | NA                                                     | NA                                                      | NA                                      | NA                                    |
|                                        | dcp1 staining                | Increased apoptosis                           | Increased apoptosis                  | NA                                                              | NA                                                     | NA                                                      | NA                                      | NA                                    |
| RNA sequencing (adult heads)           | Differential gene expression | Synaptic transmission                         | Synaptic transmission, ion transport | Cellular respiration                                            | Cell cycle process                                     | NA                                                      | NA                                      | NA                                    |
| <i>X. laevis</i> validations           | Eye area                     | Decreased area                                | NA                                   | NA                                                              | NA                                                     | NA                                                      | Rescue with <i>XIAP</i>                 | NA                                    |
|                                        | Midbrain area                | Decreased area                                | NA                                   | NA                                                              | No change                                              | NA                                                      | Rescue with <i>XIAP</i>                 | NA                                    |
|                                        | Forebrain area               | Decreased area                                | NA                                   | NA                                                              | Decreased area                                         | NA                                                      | Rescue with <i>XIAP</i>                 | NA                                    |
|                                        | Cleaved caspase-3 levels     | Increased caspase-3                           | NA                                   | NA                                                              | Increased caspase-3                                    | NA                                                      | Rescue with <i>XIAP</i>                 | NA                                    |
