1 ***NCBP2* modulates neurodevelopmental defects of the 3q29 deletion in**  
2 ***Drosophila* and *X. laevis* models**

3

4 Mayanglambam Dhruva Singh<sup>1\*</sup>, Matthew Jensen<sup>1\*</sup>, Micaela Lasser<sup>2</sup>, Emily Huber<sup>1</sup>, Tanzeen  
5 Yusuff<sup>1</sup>, Lucilla Pizzo<sup>1</sup>, Brian Lifschutz<sup>1</sup>, Inshya Desai<sup>1</sup>, Alexis Kubina<sup>1</sup>, Sneha Yennawar<sup>1</sup>,  
6 Sydney Kim<sup>2</sup>, Janani Iyer<sup>1</sup>, Diego E. Rincon-Limas<sup>3</sup>, Laura Anne Lowery<sup>2</sup>, and Santhosh  
7 Girirajan<sup>1,4</sup>

8

- 9 1. Department of Biochemistry and Molecular Biology, Pennsylvania State University,  
10 University Park, PA 16802 USA  
11 2. Department of Biology, Boston College, Chestnut Hill, MA 02467 USA  
12 3. Department of Neurology, McKnight Brain Institute, University of Florida,  
13 Gainesville, FL 32611 USA  
14 4. Department of Anthropology, Pennsylvania State University, University Park, PA  
15 16802 USA

16

17 \*contributed equally to the work

18

19 Correspondence:

20 Santhosh Girirajan, MBBS, PhD  
21 205A Life Sciences Building  
22 Pennsylvania State University  
23 University Park, PA 16802  
24 E-mail: [sxg47@psu.edu](mailto:sxg47@psu.edu)  
25 Phone: 814-865-0674

26

27

1 **ABSTRACT**

2 The chromosome 3q29 deletion is associated with a range of neurodevelopmental disorders.  
3 Here, we used quantitative methods to assay *Drosophila melanogaster* and *Xenopus laevis*  
4 models with tissue-specific knockdown of individual homologs of genes within the 3q29  
5 region. We identified developmental, cellular and neuronal phenotypes for multiple  
6 homologs, potentially due to altered apoptosis and cell cycle mechanisms. We screened for  
7 314 pairwise knockdowns of fly homologs of 3q29 genes, and identified 44 interactions  
8 between pairs of homologs and 34 interactions with other neurodevelopmental genes. *NCBP2*  
9 homologs in *Drosophila* (*Cbp20*) and *X. laevis* (*ncbp2*) enhanced the phenotypes of the other  
10 homologs, leading to significant increases in apoptosis that disrupted cellular organization  
11 and brain morphology. These cellular and neuronal defects were rescued with overexpression  
12 of the apoptosis inhibitors *Diap1* and *xiap* in both models. Our study suggests that *NCBP2*-  
13 mediated genetic interactions contribute to the neurodevelopmental features of the 3q29  
14 deletion.

15

16 **IMPACT STATEMENT**

17 *NCBP2* homologs in *Drosophila* and *X. laevis* enhance the neurodevelopmental phenotypes  
18 of other homologs of genes within the 3q29 deletion region, leading to disruptions in several  
19 cellular mechanisms.

20

21 **KEYWORDS**

22 3q29 deletion, neurodevelopment, copy-number variants, apoptosis, genetic interactions,  
23 *Drosophila melanogaster*, *Xenopus laevis*, *NCBP2*

24

## 1 INTRODUCTION

2 Rare copy number variants (CNVs), including deletions and duplications in the human  
3 genome, significantly contribute to complex neurodevelopmental disorders such as  
4 schizophrenia, intellectual disability/developmental delay, autism, and epilepsy (Girirajan et  
5 al., 2011; Malhotra and Sebat, 2012). Despite extensive phenotypic heterogeneity associated  
6 with recently described CNVs (Girirajan and Eichler, 2010), certain rare CNVs have been  
7 linked to specific neuropsychiatric diagnoses. For example, the 22q11.2 deletion  
8 (DiGeorge/velocardiofacial syndrome), the most frequently occurring pathogenic CNV, is  
9 found in about 1-2% of individuals with schizophrenia (Karayiorgou et al., 2010, 1995), and  
10 animal models of several genes within the region show neuronal and behavioral phenotypes  
11 on their own (Fenelon et al., 2011; Mukai et al., 2015). Similarly, the 1.6 Mbp recurrent  
12 deletion on chromosome 3q29, encompassing 21 genes, was initially identified in individuals  
13 with a range of neurodevelopmental features, including intellectual disability, microcephaly,  
14 craniofacial features, and speech delay (Ballif et al., 2008; Mulle et al., 2010). Further studies  
15 implicated this deletion as a major risk factor for multiple disorders (Glassford et al., 2016).  
16 In fact, the deletion confers a >40-fold increase in risk for schizophrenia (Kirov et al., 2012;  
17 Mulle, 2015) as well as a >20-fold increase in risk for autism (Pollak et al., 2019). More  
18 recently, two studies have reported decreases in body and brain sizes as well as a range of  
19 behavioral and social defects in mouse models of the entire deletion, mimicking the human  
20 developmental phenotypes associated with the deletion (Baba et al., 2019; Rutkowski et al.,  
21 2019).

22 Identifying the biological underpinnings of the 3q29 deletion is contingent upon  
23 uncovering the molecular mechanisms linking individual genes or combinations of genes  
24 within the 3q29 region to the neurodevelopmental phenotypes observed in individuals with  
25 the entire deletion. Recent studies have suggested a subset of genes in the 3q29 region as  
26 potential candidates for these phenotypes based on their established roles in neuronal  
27 development (Quintero-Rivera et al., 2010; Rutkowski et al., 2017). For example, *DLG1* is a  
28 scaffolding protein that organizes the synaptic structure at neuromuscular junctions (Budnik  
29 et al., 1996), affecting both synaptic density and plasticity during development (Walch,  
30 2013). However, mouse models of *Dlg1*<sup>+/-</sup> did not recapitulate the behavioral and  
31 developmental phenotypes observed in mice with the entire deletion (Rutkowski et al., 2019),  
32 suggesting that haploinsufficiency of *DLG1* by itself does not account for the wide range of  
33 phenotypes associated with the deletion. Given that genes within rare pathogenic CNV  
34 regions tend to share similar biological functions (Andrews et al., 2015) and interact with

1 each other to contribute towards developmental phenotypes (Iyer et al., 2018; Jensen and  
2 Girirajan, 2019), it is likely that multiple genes within the 3q29 region jointly contribute to  
3 these phenotypes through shared cellular pathways. Therefore, an approach that integrates  
4 functional analysis of individual genes within the 3q29 deletion and their combinatorial  
5 effects on neuronal and cellular phenotypes is necessary to understand the pathways and  
6 mechanisms underlying the deletion.

7       Systematic testing of genes in the 3q29 region towards developmental and cellular  
8 phenotypes requires model systems that are amenable for rapid phenotypic evaluation and  
9 allow for testing interactions between multiple dosage-imbalanced genes without affecting  
10 the viability of the organism. *Drosophila melanogaster* and *Xenopus laevis* provide such  
11 powerful genetic models for studying conserved mechanisms that are altered in  
12 neurodevelopmental disorders, with the ability to manipulate gene expression in a tissue-  
13 specific manner in *Drosophila* (Wangler et al., 2015) and examine developmental defects in  
14 *X. laevis* (Pratt and Khakhalin, 2013). Both model systems contain homologs for a large  
15 majority of disease-causing genes in humans, and show a high degree of conservation in key  
16 developmental pathways (Gatto and Broadie, 2011; Harland and Grainger, 2011; Reiter et al.,  
17 2001; Wangler et al., 2015). For example, *Drosophila* knockdown models of the candidate  
18 schizophrenia gene *DTNBP1* showed dysregulation of synaptic homeostasis and altered  
19 glutamatergic and dopaminergic neuron function (Dickman and Davis, 2009; Shao et al.,  
20 2011), and fly models for *UBE3A*, the gene associated with Angelman syndrome, showed  
21 sleep, memory and locomotor defects (Wu et al., 2008). Furthermore, *X. laevis* models have  
22 been widely used to identify morphological and neuronal defects associated with  
23 developmental disorders (Pratt and Khakhalin, 2013), such as dendritic connectivity defects  
24 with overexpression of *MECP2*, the causative gene for Rett syndrome (Marshak et al., 2012).  
25 Thus, *Drosophila* and *X. laevis* models of individual CNV homologs and their interactions  
26 will allow for a deeper dissection of the molecular mechanisms disrupted by the deletion,  
27 complementing the phenotypes documented in mouse models of the entire deletion (Baba et  
28 al., 2019; Rutkowski et al., 2019).

29       Here, we used a mechanistic approach to understand the role of individual homologs  
30 of 3q29 genes and their interactions towards pathogenicity of the deletion. We systematically  
31 characterized developmental, cellular, and nervous system phenotypes for 14 conserved  
32 homologs of human 3q29 genes and 314 pairwise interactions using *Drosophila*, and  
33 validated these phenotypes using *X. laevis*. We found that multiple homologs of genes within  
34 the 3q29 region, including *NCBP2*, *DLG1*, *FBXO45*, *PIGZ*, and *BDHI*, contribute to



1 disruptions in apoptosis and cell cycle pathways, leading to neuronal and developmental  
2 defects in both model systems. These defects were further enhanced when each of the  
3 homologs were concomitantly knocked down with homologs of *NCBP2* in *Drosophila*  
4 (*Cbp20*) and *X. laevis* (*ncbp2*), resulting in increased apoptosis and dysregulation of cell  
5 cycle genes. Our results support an oligogenic model for the pathogenicity of the 3q29  
6 deletion, and implicate specific cellular mechanisms for the observed developmental  
7 phenotypes.  
8

## 1 RESULTS

### 2 **Reduced expression of individual homologs of 3q29 genes causes global developmental** 3 **defects**

4 We used reciprocal BLAST and orthology prediction tools (see Methods) to identify fly  
5 homologs for 15 of the 21 genes within the 3q29 deletion region (**Figure 1, Figure 1—**  
6 **Figure Supplement 1**). We note that the genes and crosses tested in this study are  
7 represented with fly gene names along with the human counterparts at first mention in the  
8 text, i.e. *Cbp20* (*NCBP2*), and fly genes with allele names in the figures, i.e. *Cbp20*<sup>KK109448</sup>.  
9 The biological functions of these 15 genes are also conserved between *Drosophila* and  
10 humans, as 61 of the 69 Gene Ontology terms (88.4%) annotations for the human genes are  
11 also annotated in their respective fly homologs (**Supplementary File 1**). For example, *dlg1*  
12 (*DLG1*) and *Cbp20* (*NCBP2*) share the same roles in both flies and vertebrates, respectively,  
13 as a scaffolding protein at the synaptic junction (Muller et al., 1995) and a member of the  
14 RNA cap binding complex (Sabin et al., 2009). We used RNA interference (RNAi) and the  
15 *UAS-GAL4* system to knockdown expression levels of fly homologs of genes within the 3q29  
16 region ubiquitously and in neuronal, wing and eye tissues (Brand and Perrimon, 1993)  
17 (**Figure 1**). A stock list of the fly lines used in this study and full genotypes for all  
18 experiments are provided in **Supplementary File 2**. Quantitative PCR (qPCR) confirmed  
19 partial knockdown of gene expression for each of the tested homologs (**Figure 1—Figure**  
20 **Supplement 2**); fly lines for *CG5359* (*TCTEXID2*) were excluded from further analysis after  
21 additional quality control assessment (see Methods). To identify genes essential for organism  
22 survival and neurodevelopment, we first assessed the effect of ubiquitous knockdown of fly  
23 homologs of 3q29 genes using the *da-GAL4* driver (**Figure 2A**). Seven of the 14 homologs,  
24 including *dlg1*, *Cbp20*, and *Tsf2* (*MF12*), showed lethality or severe developmental defects  
25 with ubiquitous knockdown, suggesting that multiple homologs of 3q29 genes are essential  
26 for viability during early development. Similarly, wing-specific *beadex*<sup>MS1096</sup>-*GAL4*  
27 knockdown of *Tsf2*, *Cbp20*, *CG8888* (*BDH1*), and *Pak* (*PAK2*) showed severe wing defects  
28 and knockdown of *dlg1* showed larval lethality (**Figure 2—Figure Supplement 1A**).

29 Several fly homologs for genes within the 3q29 region have previously been  
30 associated with a range of neuronal defects during fly development (**Figure 1—Figure**  
31 **Supplement 3**). For example, loss of *dlg1* contributes to morphological and physiological  
32 defects at the neuromuscular junction, as well as increased brain size, abnormal courtship  
33 behavior, and loss of gravitaxis response (Armstrong et al., 2006; Mendoza-Topaz et al.,  
34 2008; Thomas et al., 1997). Similarly, *Pak* mutant flies exhibited extensive defects in the

1 axonal targeting of sensory and motor neurons (Hing et al., 1999; Kim et al., 2003), in  
2 addition to abnormal NMJ and mushroom body development (Ng and Luo, 2004; Parnas et  
3 al., 2001). We sought to determine whether fly homologs for other genes in the 3q29 region  
4 also contribute to defects in neuronal function, and therefore performed climbing assays for  
5 motor defects and staining of larval brains for axonal targeting with pan-neuronal knockdown  
6 of the fly homologs. Interestingly, *Elav-GAL4* mediated pan-neuronal knockdown caused  
7 partial larval or pupal lethality in *dlg*, *Tsf2*, and *CG5543* (*WDR53*) flies (**Figure 2A**), and  
8 about 30% of adult flies with knockdown of *dlg1* did not survive beyond day 5 (**Figure 2—**  
9 **Figure Supplement 1B**), indicating an essential role for these genes in neuronal  
10 development. Furthermore, we found that flies with pan-neuronal knockdown of several  
11 homologs of 3q29 genes, including *dlg1* and *Cbp20*, exhibited a strong reduction in climbing  
12 ability over ten days (**Figure 2B, Video 1**), suggesting that these genes could contribute to  
13 abnormalities in synaptic and motor functions (Sherwood et al., 2004). We next examined the  
14 axonal projections of photoreceptor cells into the optic lobe by staining third instar larval  
15 brains with anti-chaoptin. We found that *GMR-GAL4* mediated eye-specific knockdown of  
16 *Cbp20*, *dlg1*, *Pak* and *Fsn* (*FBXO45*) showed several axonal targeting defects (**Figure 2—**  
17 **Figure Supplement 1C, Figure 2—Figure Supplement 2**). Our results recapitulated the  
18 previous findings in *Pak* mutant flies (Hing et al., 1999), and were similar to targeting defects  
19 observed in models of other candidate neurodevelopmental genes, including the *Drosophila*  
20 homologs for human *DISC1* and *FMRI* (Chen et al., 2011; Morales et al., 2002). Overall, our  
21 data show that multiple conserved homologs of genes in the 3q29 region beyond just *dlg1* or  
22 *Pak* are important for *Drosophila* neurodevelopment, suggesting an oligogenic model for  
23 pathogenicity of the deletion as opposed to a single causative gene.

24

### 25 ***Drosophila* eye models for genes within the 3q29 region show cellular defects**

26 The *Drosophila* compound eye has been classically used for performing high-throughput  
27 genetic screens and quantitative assays of cellular and neurodevelopmental defects (Thomas  
28 and Wassarman, 1999). In fact, about two-thirds of all vital genes in the fly genome are  
29 predicted to be involved in fly eye development (Thaker and Kankel, 1992). For instance, the  
30 *Drosophila* eye model was recently used to screen a large set of intellectual disability genes  
31 (Oortveld et al., 2013), and genetic interaction studies using the fly eye have identified  
32 modifier genes for Rett syndrome, spinocerebellar ataxia type 3, and other conserved  
33 developmental processes (Bilen and Bonini, 2007; Cukier et al., 2008; Neufeld et al., 1998).  
34 We used the developing fly eye as an *in vivo* system to quantify the effect of gene

1 knockdown on adult eye morphology, cellular organization in the pupal eye, and cell  
2 proliferation and death in the larval imaginal eye disc (**Figure 2—Figure Supplement 3**).  
3 The wild-type adult *Drosophila* eye consists of about 750 ommatidia containing different cell  
4 types arranged in a regular hexagonal structure, which can be easily perturbed by genetic  
5 modifications (Cagan and Ready, 1989; Kumar, 2012). Because of this, we first performed  
6 eye-specific RNAi knockdown of fly homologs of genes in the 3q29 region using *GMR*-  
7 *GAL4*, and measured the rough eye phenotype of each knockdown line using *Flynotyper*, a  
8 quantitative tool that calculates a phenotypic score based on defects in ommatidial  
9 arrangement (Iyer et al., 2016). We found that eye-specific knockdown of 8 out of 13  
10 homologs of 3q29 genes showed significant external eye phenotypes compared with control  
11 *GMR-GAL4* flies, while knockdown of *Tsf2* caused lethality (**Figure 2C, Figure 2—Figure**  
12 **Supplement 4**). For example, knockdown of *Cbp20* resulted in a severe rough eye phenotype  
13 that was comparable to knockdown of other neurodevelopmental genes (Iyer et al., 2016),  
14 such as *Prosap* (*SHANK3*) and *kis* (*CHD8*) (**Figure 2—Figure Supplement 5**).

15 To examine the cellular mechanisms underlying the rough eye phenotypes observed  
16 with knockdown of fly homologs of 3q29 genes, we first measured changes in area and  
17 ommatidial size of the adult eyes. We found a significant reduction in eye size with  
18 knockdown of *CG8888* and *Cbp20*, while the eyes of flies with knockdown of *dlg1* were  
19 significantly larger than *GMR-GAL4* controls (**Figure 2D**). Similarly, we observed decreases  
20 in ommatidial diameter with knockdown of *Cbp20* and *CG8888*, suggesting that these genes  
21 also contribute to abnormal cell growth phenotypes (**Figure 2—Figure Supplement 4B**). We  
22 also assessed the cellular structure of 44 hour-old pupal eyes by staining the ommatidial and  
23 photoreceptor cells with anti-DLG, a septate junction marker, and Phalloidin, a marker for F-  
24 actin at cell boundaries (**Figure 2—Figure Supplement 3B**). We found that knockdown of  
25 11 out of 12 tested fly homologs of 3q29 genes caused disorganization or loss of the  
26 photoreceptor neurons and ommatidial cells (**Figure 2E, Figure 2—Figure Supplement 6A-**  
27 **B, Figure 2—Figure Supplement 7**). For example, pupal eyes with knockdown of *CG8888*,  
28 *dlg1*, *Cbp20* and *CG5543* all showed defects in cone cell orientation and ommatidial rotation  
29 compared with control *GMR-GAL4* flies. Furthermore, *Cbp20* and *dlg1* knockdown flies  
30 showed hexagonal defects and severe disorganization of photoreceptor neurons, while *Cbp20*  
31 knockdown flies also showed fused secondary cells and *dlg1* knockdown flies showed a  
32 complete loss of bristle cells.

33 We next hypothesized that abnormal proliferation and apoptosis may contribute to the  
34 cellular defects observed with knockdown of fly homologs of 3q29 genes. To test this, we

1 stained the third instar larval eye discs for select knockdowns of individual homologs of 3q29  
2 genes with anti-pH3 (phospho-Histone H3 (Ser10)) and *Drosophila* caspase-1 (*dcp1*),  
3 markers for proliferating and apoptotic cells, and quantified the number of cells posterior and  
4 adjacent to the morphogenetic furrow (**Figure 2—Figure Supplement 3C**). We observed a  
5 significant decrease in pH3-positive cells for *CG8888* knockdown flies and trends towards  
6 increased pH3-positive cells for *PIG-Z* (*PIGZ*) and *dlg1* knockdown flies (**Figure 2E-F**,  
7 **Figure 2—Figure Supplement 6C**), while knockdown of *dlg1* also led to significant  
8 increases in cells stained with bromodeoxyuridine (BrdU), a marker for replicating cells  
9 (**Figure 2—Figure Supplement 6D-E**). Flies with knockdown of *Cbp20* or *dlg1* also  
10 showed a significant increase in apoptotic *dcp1*-positive cells compared with *GMR-GAL4*  
11 controls (**Figure 2G**), which we validated using TUNEL assays for these lines (**Figure 2—**  
12 **Figure Supplement 6F**). We further tested for proliferation and apoptosis in the third instar  
13 larval wing discs of flies with knockdown of homologs of 3q29 genes using the *beadex*<sup>MS1096</sup>-  
14 *GAL4* driver, and observed changes in both processes with knockdown of *dlg1*, *CG8888* and  
15 *Cbp20* (**Figure 2—Figure Supplement 8**). Knockdown of *Cbp20* in particular showed *dcp1*-  
16 positive staining across the entire wing pouch in the larval wing disc. These data suggest that  
17 knockdown of multiple fly homologs of genes in the 3q29 region contribute to defects in  
18 apoptosis and proliferation during early development, leading to the observed defects in cell  
19 count and organization (**Table 1**).

20

### 21 **Interactions between fly homologs of 3q29 genes enhance neuronal phenotypes**

22 As knockdown fly models for homologs of multiple 3q29 genes showed a variety of  
23 neuronal, developmental, and cellular defects, we hypothesized that interactions between  
24 multiple genes in the 3q29 region could contribute to the neurodevelopmental phenotypes of  
25 the entire deletion. We therefore generated *GMR-GAL4* recombinant lines for nine fly  
26 homologs of 3q29 genes, crossed these lines with multiple RNAi or mutant lines for other  
27 homologs of 3q29 genes to generate 94 pairwise knockdowns with 161 two-hit crosses, and  
28 assessed changes in the severity of eye phenotypes using *Flynotyper* (**Figure 1, Figure 3—**  
29 **Figure Supplement 1**). We found a significant enhancement in phenotypic severity for 39  
30 pairwise knockdowns of homologs of 3q29 genes, validated with a second line when  
31 available, compared with knockdowns for individual homologs of 3q29 genes (**Figure 3A**,  
32 **Figure 3—Figure Supplement 2-3**). In fact, we found that 19 out of 21 pairwise interactions  
33 involving *Cbp20* as either a first or second-hit gene resulted in more severe eye phenotypes,  
34 suggesting that reduced expression of *Cbp20* drastically modifies the morphological

1 phenotypes of other homologs of 3q29 genes (**Figure 3B-D**). For further validation, we also  
2 compared pairs of reciprocal crosses (i.e. *Fsn/CG8888* versus *CG8888/Fsn*) and confirmed  
3 concordant results for 19 out of 26 reciprocal interactions, including 14/16 reciprocal  
4 interactions involving *Cbp20* (**Figure 3—Figure Supplement 1**). We also found a non-  
5 significant increase in severity for *dlg1/Pak* knockdown flies using both RNAi and mutant  
6 lines, concordant with enhanced neuromuscular junction and circadian rhythm defects  
7 observed in mutant *dlg1/Pak* flies described by Grice and colleagues (Grice et al., 2015).

8 As *Cbp20* knockdown enhanced the rough eye phenotypes of multiple homologs of  
9 other 3q29 genes, we next tested for enhancement of other neuronal defects among flies with  
10 knockdown of *Cbp20* and other homologs of 3q29 genes. We found that the simultaneous  
11 knockdown of *Cbp20* with *dlg1* or *Fsn* led to an increase in severity of axon targeting defects  
12 (**Figure 3E**). For instance, while knockdown of *Cbp20* mostly led to mild-to-moderate axon  
13 guidance defects, such as loss of R7-R8 axon projection into the medulla, we observed more  
14 severe losses of projection across all of the axons with simultaneous knockdown of *Cbp20*  
15 and *dlg1* or *Fsn* (**Figure 2—Figure Supplement 2**). We also tested pan-neuronal *Elav-GAL4*  
16 knockdown of select pairs of homologs, and found that both *Cbp20/dlg1* and *Cbp20/Fsn*  
17 significantly enhanced the severity of climbing defects observed with knockdown of *Cbp20*  
18 (**Figure 3F, Video 2**). Overall, these data suggest that *Cbp20* interacts with other homologs  
19 of genes in the 3q29 region to enhance the observed cellular and neuronal defects, suggesting  
20 that *NCBP2* is a key modifier of the developmental phenotypes associated with the deletion  
21 (**Table 1**).

22 To further characterize the functional effects of interactions between homologs of  
23 3q29 genes, we analyzed changes in gene expression by performing RNA-sequencing of  
24 heads from flies with select pan-neuronal knockdown of individual (*Cbp20*, *dlg1*, *Fsn*, and  
25 *Pak*) and pairs (*Cbp20/dlg1* and *Cbp20/Fsn*) of homologs of 3q29 genes. We identified  
26 differentially-expressed genes in each of the tested fly models compared with *Elav-GAL4*  
27 controls, and performed enrichment analysis on both the differentially-expressed fly genes  
28 and their corresponding human homologs (**Supplementary File 3**). We found that  
29 knockdown of each of the individual homologs showed enrichment for dysregulation of  
30 cellular and developmental processes (**Figure 3—Figure Supplement 4A**). For example,  
31 flies with knockdown of *dlg1* and *Cbp20* showed enrichment for dysregulation of homologs  
32 for human synaptic transmission genes, including *Glt* (*NLGN1*) and *nAChRβ3* (*HTR3A*).  
33 Furthermore, flies with knockdown of *Cbp20* were enriched for dysregulated fly genes  
34 related to metabolic processes, while knockdown of *Fsn* led to dysregulation of fly genes



1 involved in response to external stimuli and immune response. We also found that homologs  
2 of the key signaling genes dysregulated in mouse models of the 3q29 deletion reported by  
3 Baba and colleagues (Baba et al., 2019) were differentially expressed in our fly models for  
4 homologs of 3q29 genes. In fact, knockdown of *Fsn* led to altered expression of all “early  
5 immediate” signaling genes dysregulated in the deletion mouse model (Baba et al., 2019).  
6 While dysregulated genes in *Cbp20/dlg1* knockdown flies showed enrichments for protein  
7 folding and sensory perception, *Cbp20/Fsn* knockdown flies were uniquely enriched for  
8 dysregulated cell cycle genes, including *Aura* (*AURKA*), *Cdk1* (*CDK1*), *lok* (*CHEK2*), and  
9 *CycE* (*CCNE1*) (**Figure 3—Figure Supplement 4B-C**). We similarly found 17  
10 differentially-expressed homologs corresponding to human apoptosis genes in *Cbp20/Fsn*  
11 knockdown flies, including homologs for the DNA fragmentation gene *Sid* (*ENDOG*) and the  
12 apoptosis signaling genes *tor* (*RET*) and *Hsp70Bb* (*HSPA1A*). Furthermore, we found a  
13 strong enrichment for fly genes whose human homologs are preferentially expressed in early  
14 and mid-fetal brain tissues among the dysregulated genes in *Cbp20/Fsn* knockdown flies  
15 (**Figure 3—Figure Supplement 4D**). These data suggest that *Cbp20* interacts with other  
16 homologs of genes in the 3q29 region to disrupt a variety of key biological functions,  
17 including apoptosis and cell cycle pathways as well as synaptic transmission and metabolic  
18 pathways, ultimately leading to enhanced neuronal phenotypes (**Table 1**).

19 Finally, to complement the interactions among homologs of 3q29 genes that we  
20 identified in *Drosophila*, we examined the connectivity patterns of 3q29 genes within human  
21 gene interaction databases. Gene interaction networks derived from co-expression and  
22 protein-protein interaction data (Greene et al., 2015; Warde-Farley et al., 2010) showed large  
23 modules of connected genes within the 3q29 region, including a strongly-connected  
24 component involving 11 out of 21 3q29 genes (**Figure 3—Figure Supplement 5A-B**).  
25 However, the average connectivity among 3q29 genes within a brain-specific interaction  
26 network (Krishnan et al., 2016) was not significantly different from the connectivity of  
27 randomly-selected sets of genes throughout the genome (**Figure 3—Figure Supplement**  
28 **5C**), suggesting that a subset of genes drive the complexity of genetic interactions within the  
29 region. This paradigm was previously observed among genes in the 22q11.2 deletion region,  
30 where interactions between *PRODH* and *COMT* modulate neurotransmitter function  
31 independently of other genes in the region (Paterlini et al., 2005). In fact, five genes in the  
32 3q29 region, including *NCBP2*, *PAK2*, and *DLG1*, showed significantly higher connectivity  
33 to other 3q29 genes compared with the average connectivity of random sets of genes (**Figure**



1 **3—Figure Supplement 5D**). Interestingly, *NCBP2* showed the highest connectivity of all  
2 genes in the region, further highlighting its role as a key modulator of genes in the region.

3

#### 4 **Interactions between *Cbp20* and other homologs of 3q29 genes enhance apoptosis** 5 **defects**

6 Cell death and proliferation are two antagonistic forces that maintain an appropriate number  
7 of neurons during development (Yamaguchi and Miura, 2015). In fact, both processes have  
8 been previously identified as candidate mechanisms for several neurodevelopmental  
9 disorders (Ernst, 2016; Glantz et al., 2006; Pinto et al., 2010). While knockdown of *Cbp20*  
10 with other homologs of 3q29 genes likely disrupts multiple cellular processes that contribute  
11 towards the enhanced cellular defects, we next specifically investigated the role of apoptosis  
12 towards these defects, as larval eye and wing discs with knockdown of *Cbp20* showed strong  
13 increases in apoptosis. We observed black necrotic patches on the ommatidia in adult eyes  
14 with knockdown of *Cbp20/dlg1* and *Cbp20/Fsn*, indicating an increase in cell death with  
15 these interactions (**Figure 4A, Figure 4—Figure Supplement 1A**). In fact, significantly  
16 larger regions of necrotic patches were observed in flies homozygous for *Cbp20* RNAi and  
17 heterozygous for *dlg1* RNAi (see **Supplementary File 2** for full genotype annotation),  
18 suggesting that the knockdown of both homologs contributes to ommatidial cell death  
19 (**Figure 4A**). Furthermore, we found an enhanced disruption of ommatidial cell organization  
20 and loss of photoreceptors in pupal flies with concomitant knockdown of *Cbp20* with *dlg1*,  
21 *Fsn* or *CG8888*, emphasizing the role of these genes in maintaining cell count and  
22 organization (**Figure 4B-C, Figure 4—Figure Supplement 1B and 2**). Based on these  
23 observations, we assayed for apoptotic cells in the larval eye discs of flies with knockdown of  
24 *Cbp20* and other homologs of 3q29 genes. We observed significant increases in the number  
25 of apoptotic cells, as measured by dcp1 (**Figure 4D-E**) and TUNEL staining (**Figure 4—**  
26 **Figure Supplement 1C-D**), when *Cbp20* was knocked down along with *CG8888*, *dlg1*, or  
27 *Fsn*. *Cbp20/CG8888* knockdown flies also showed a decreased number of pH3-positive cells,  
28 suggesting that both apoptosis and proliferation are affected by the interaction between these  
29 two genes (**Figure 4F**).

30 To validate apoptosis as a candidate mechanism for the cellular defects of flies with  
31 knockdown of homologs of 3q29 genes, we crossed recombinant fly lines of *Cbp20* and *dlg1*  
32 with flies overexpressing *Diap1* (death-associated inhibitor of apoptosis). *Diap1* is an E3  
33 ubiquitin ligase that targets *Dronc*, the fly homolog of caspase-9, and prevents the subsequent  
34 activation of downstream caspases that lead to apoptosis (Steller, 2008) (**Figure 5—Figure**

1 **Supplement 1A**). We found that overexpression of *Diap1* rescued the adult rough eye  
2 phenotypes (**Figure 5A-B, Figure 5—Figure Supplement 1B-C**) and increased the eye sizes  
3 of *Cbp20* and *dlg1* flies (**Figure 5—Figure Supplement 1D**). These observations were  
4 corroborated by the reversal of cellular changes in the eye, including the rescue of  
5 ommatidial structure and cell count deficits observed with knockdown of *Cbp20* and *dlg1*  
6 upon *Diap1* overexpression (**Figure 5D, Figure 5—Figure Supplement 1E**). Furthermore,  
7 overexpression of *Diap1* led to significant reductions in the number of TUNEL and dcp1-  
8 positive cells in the larval eye discs of flies with knockdown of *Cbp20* and *dlg1*, confirming  
9 the rescue of apoptosis defects in these flies (**Figure 5E-F, Figure 5—Figure Supplement**  
10 **1F-G**). Interestingly, *Diap1* overexpression also suppressed the photoreceptor axon targeting  
11 defects observed with knockdown of *Cbp20* (**Figure 5G, Figure 2—Figure Supplement 2**),  
12 suggesting that the neuronal defects observed in these flies could be attributed to increased  
13 apoptosis. We further confirmed these mechanistic findings by observing increased severity  
14 in cellular phenotypes upon overexpression of *Dronc* in *Cbp20* and *dlg1* knockdown flies.  
15 For example, we observed black necrotic patches (**Figures 5A and 5C**) and exaggerated  
16 apoptotic responses (**Figure 5E-F, Figure 5—Figure Supplement 1F-G**) in *Cbp20*  
17 knockdown flies with overexpression of *Dronc*. These results suggest that apoptosis mediates  
18 the cellular defects observed in flies with knockdown of *Cbp20* and *dlg1*, emphasizing its  
19 role towards pathogenicity of the deletion.

20

### 21 **3q29 genes interact with canonical neurodevelopmental genes**

22 We further explored the role of 3q29 genes in neurodevelopmental pathways by screening  
23 four fly homologs with strong neurodevelopmental phenotypes (*Cbp20*, *dlg1*, *CG8888*, and  
24 *Pak*) for interactions with homologs of 15 known human neurodevelopmental genes, for a  
25 total of 60 pairwise interactions and 153 two-hit crosses (**Figure 6A**). We selected these  
26 neurodevelopmental genes for screening based on their association with developmental  
27 disorders in humans (Coe et al., 2012; Iyer et al., 2016), and included eight genes associated  
28 with apoptosis or cell cycle functions as well as four genes associated with microcephaly  
29 (Nicholas et al., 2009), a key phenotype observed in approximately 50% of 3q29 deletion  
30 carriers (Ballif et al., 2008). We found that 34 pairwise interactions, validated with a second  
31 line when available, led to significant increases in eye phenotypes compared with individual  
32 knockdown of the homologs of 3q29 genes (**Figure 6—Figure Supplement 1-2**). These  
33 interactions included 19 validated interactions of homologs of 3q29 genes with apoptosis or  
34 cell cycle genes as well as 10 interactions with microcephaly genes. We found that 13 out of

1 15 homologs of neurodevelopmental genes, including all four microcephaly genes, enhanced  
2 the phenotypes observed with knockdown of *Cbp20* alone. Furthermore, knockdown of  
3 *Cbp20* or *dlg1* enhanced the ommatidial necrotic patches observed with knockdown of *arm*  
4 (*CTNNB1*) (**Figure 6B**). Interestingly, we also found that knockdown of *CG8888* and *dlg1*  
5 suppressed the rough eye phenotypes observed with knockdown of *Prosap* (*SHANK3*), while  
6 knockdown of *Pak* suppressed the phenotypes of both *Prosap* and *Pten* (*PTEN*) knockdown  
7 flies (**Figure 6B, Figure 6—Figure Supplement 3**). Several of these interactions have been  
8 previously observed to modulate neuronal function in model systems. For example, *SHANK3*  
9 interacts with *DLG1* through the mediator protein DLGAP1 to influence post-synaptic  
10 density in mice (Coba et al., 2018) and binds to proteins in the Rac1 complex, including  
11 PAK2, to regulate synaptic structure (Duffney et al., 2015; Park et al., 2003). These results  
12 suggest that homologs of 3q29 genes interact with key developmental genes in conserved  
13 pathways to modify cellular phenotypes.

14

### 15 **Reduction of 3q29 gene expression causes developmental defects in *Xenopus laevis***

16 After identifying a wide range of neurodevelopmental defects due to knockdown of fly  
17 homologs of 3q29 genes, we sought to gain further insight into the conserved functions of  
18 these genes in vertebrate embryonic brain development using the *Xenopus laevis* model  
19 system. We examined the effect of targeted knockdown of *ncbp2*, *fbxo45*, and *pak2*, as  
20 homologs of these genes displayed multiple severe phenotypes with reduced gene expression  
21 in flies. Knockdown of *X. laevis* homologs for each 3q29 gene was accomplished using  
22 antisense morpholino oligonucleotides (MOs) targeted to early splice sites of each homolog  
23 (**Figure 1**). *X. laevis* embryos were injected at either the two- or four-cell stage with various  
24 concentrations of MO for each homolog or a standard control, and were validated using RT-  
25 PCR (**Figure 7—Figure Supplement 1A-B**). As reduction of *Cbp20*, *Fsn*, and *Pak* each  
26 resulted in neuronal defects in *Drosophila*, we first examined the effects of knockdown of  
27 these homologs on *X. laevis* brain development at stage 47. To test this, we knocked down  
28 each gene in half of the embryo at the two-cell stage, and left the other half uninjected to  
29 create a side-by-side comparison of brain morphology (**Figure 7A**). We performed whole-  
30 mount immunostaining with anti-alpha tubulin and found that reduction of *ncbp2*, *fbxo45*,  
31 and *pak2* each resulted in smaller forebrain and midbrain size compared with controls  
32 (**Figures 7A-C**). We also found that simultaneous knockdown of *ncbp2* with *fbxo45* caused a  
33 significant decrease in forebrain size and a trend towards decreased midbrain size compared  
34 with *ncbp2* knockdown (**Figure 7A-C**). Knockdown of *pak2* with *ncbp2* showed a similar

1 trend towards decreased forebrain size. Interestingly, the reduced brain volumes we observed  
2 with knockdown of homologs of 3q29 genes in *X. laevis* recapitulate the reduced brain  
3 volume observed in 3q29 deletion mice (Baba et al., 2019; Rutkowski et al., 2019),  
4 suggesting multiple genes in the 3q29 region contribute to this deletion phenotype. We  
5 further examined the effect of knocking down homologs of 3q29 genes on *X. laevis* eye  
6 development at stage 42, and found that knockdown of these homologs caused irregular  
7 shapes and decreased size compared with controls (**Figure 7—Figure Supplement 2A-B**).  
8 The reductions in eye size were rescued to control levels when mRNA was co-injected along  
9 with MO for each homolog (**Figure 7—Figure Supplement 2C**). Together, these data show  
10 that individual and pairwise knockdown of homologs of 3q29 genes in *X. laevis* leads to  
11 abnormal brain and eye morphology, confirming the conserved role of these genes during  
12 vertebrate development.

13 To determine if the knockdown of homologs of 3q29 genes also disrupted apoptotic  
14 processes in *X. laevis*, we tested whether overexpression of the X-linked inhibitor of  
15 apoptosis gene (*xiap*) could rescue the observed developmental defects. We found that  
16 overexpression of *xiap* rescued the midbrain and forebrain size deficits observed with *ncbp2*  
17 knockdown to control levels (**Figure 7A-C**). Similarly, we found that the decreased eye sizes  
18 and morphological defects observed with knockdown of *ncbp2* were rescued with *xiap*  
19 overexpression (**Figure 7—Figure Supplement 2A-B**). To further validate these findings,  
20 we performed a western blot following knockdown of *fbxo45* and *ncbp2* using anti-cleaved  
21 caspase-3 (Asp175) as a marker for apoptosis (**Figure 7D, Figure 7—Figure Supplement**  
22 **1C**). We found that reduction of *fbxo45* and *ncbp2* expression each led to an increase in  
23 cleaved caspase-3 levels compared with controls, which were restored to control levels with  
24 concomitant overexpression of *xiap* (**Figure 7E**). Caspase-3 levels were also enhanced when  
25 *fbxo45* and *ncbp2* were knocked down together (**Figure 7E**), suggesting that these two  
26 homologs contribute towards developmental phenotypes through increased apoptosis.  
27 Overall, these results suggest involvement of apoptotic processes towards the developmental  
28 phenotypes observed with knockdown of homologs of 3q29 genes in a vertebrate model  
29 (**Table 1**).

30

## 1 DISCUSSION

2 Using complementary *Drosophila* and *X. laevis* models, we interrogated individual genes,  
3 genetic interactions, and cellular mechanisms potentially responsible for the  
4 neurodevelopmental phenotypes associated with the 3q29 deletion. Our major findings were  
5 recapitulated across both model systems (**Table 1**) and could also potentially account for the  
6 developmental phenotypes reported in mouse models of the entire deletion. Several themes  
7 emerge from our study that exemplify the genetic and mechanistic complexity of the 3q29  
8 deletion.

9 *First*, our analysis of developmental phenotypes upon knockdown of homologs for  
10 individual 3q29 genes showed that a single gene within the region may not be solely  
11 responsible for the effects of the deletion. In fact, we found that knockdown of 12 out of 14  
12 fly homologs showed developmental defects in *Drosophila*, while every fly homolog showed  
13 an enhanced rough eye phenotype when knocked down along with at least one other homolog  
14 (**Figure 2**). Although our study is limited to examining conserved cellular phenotypes of  
15 homologs of 3q29 genes in *Drosophila* and *X. laevis*, evidence from other model organisms  
16 also supports an oligogenic model for the deletion. In fact, knockout mouse models for  
17 several 3q29 genes have been reported to exhibit severe developmental phenotypes, including  
18 axonal and synaptic defects in *Fbxo45*<sup>-/-</sup> and embryonic lethality in *Pak2*<sup>-/-</sup> and *Pcyt1a*<sup>-/-</sup>  
19 knockout mice (Marlin et al., 2011; Saiga et al., 2009; Wang et al., 2005) (**Figure 1—Figure**  
20 **Supplement 3**). Notably, *Dlg1*<sup>+/-</sup> or *Pak2*<sup>+/-</sup> mice did not recapitulate major developmental  
21 and behavioral features observed in mouse models of the entire deletion (Baba et al., 2019;  
22 Rutkowski et al., 2019; Wang et al., 2018), suggesting that these phenotypes are contingent  
23 upon haploinsufficiency of multiple genes in the region (**Figure 8—Figure Supplement 1**).  
24 Furthermore, several 3q29 genes including *PAK2*, *DLG1*, *PCYT1A*, and *UBXN7* are under  
25 evolutionary constraint in humans based on gene pathogenicity metrics (**Supplementary File**  
26 **1**). Two genes in the 3q29 region without fly homologs, *CEP19* and *TFRC*, are also under  
27 evolutionary constraint in humans, with *TFRC* having been implicated in neural tube defects  
28 and embryonic lethality in mouse models (Levy et al., 1999). While no common variants  
29 associated with neurodevelopmental traits have been observed in the 3q29 region (Eicher et  
30 al., 2015), rare variants of varying effects in 9 out of the 21 genes have been identified among  
31 patients with different developmental disorders (Abrahams et al., 2013; Purcell et al., 2014;  
32 Turner et al., 2017) (**Supplementary File 1**). These data, combined with our findings in  
33 *Drosophila* and *X. laevis*, implicate multiple genes in the 3q29 region towards the  
34 pathogenicity of the entire deletion.



1            *Second*, our screening of 161 crosses between pairs of fly homologs of 3q29 genes  
2 identified 44 interactions that showed enhanced rough eye phenotypes, suggesting that  
3 complex interactions among 3q29 genes could be responsible for the developmental defects  
4 observed in carriers of the deletion (**Figure 8A**). While we only tested a subset of all possible  
5 interactions among the non-syntenic homologs of 3q29 genes in *Drosophila*, our results  
6 highlight conserved mechanistic relationships between “parts”, or the individual genes,  
7 towards understanding the effects of the “whole” deletion. For example, knockdown of  
8 *Cbp20* enhanced the phenotypes of 11 out of 12 other fly homologs, suggesting that *NCBP2*  
9 could be a key modulator of the deletion phenotype. *NCBP2* encodes a subunit of the nuclear  
10 cap-binding complex (CBC), which binds to the 5’ end of mRNA and microRNA in the  
11 nucleus (Pabis et al., 2010). Given the role of the CBC in post-transcriptional regulatory  
12 mechanisms such as nonsense-mediated decay, alternative splicing and mRNA transport  
13 (Gonatopoulos-Pournatzis and Cowling, 2014; Maquat, 2004), it is possible that disruption of  
14 this complex could result in changes to a broad set of genes and biological processes. In fact,  
15 our analysis of differentially-expressed genes in *Cbp20* knockdown flies showed disruption  
16 of synaptic transmission, cellular respiration, and several metabolic pathways. In contrast to  
17 other proposed candidate genes in the 3q29 region, *NCBP2* was not predicted to be  
18 pathogenic on its own in humans (**Supplementary File 1**) and does not have identified  
19 deleterious mutations in sequencing studies of neurodevelopmental disease cohorts so far,  
20 indicating its potential role as a modifier of the other candidate genes in the region (**Figure**  
21 **8B**). Our results also complement previous reports of synergistic interactions among fly  
22 homologs of 3q29 genes in the nervous system (Grice et al., 2015), representing another  
23 hallmark of an oligogenic model for the deletion. As these genetic interactions may vary  
24 across different species, developmental timepoints, and tissues, the role of these interactions  
25 should be more deeply explored using mouse and human cell culture models.

26            *Third*, we identified disruptions to several cellular processes due to both single and  
27 pairwise knockdown of homologs in *Drosophila* and *X. laevis* models (**Table 1**). For  
28 example, simultaneous knockdown of homologs of *NCBP2* and *FBXO45* in *Drosophila* led to  
29 enhanced cellular disorganization (**Figure 4**) and altered expression of cell cycle and  
30 apoptosis genes (**Figure 3—Figure Supplement 5**), as well as enhanced morphological  
31 defects and increased caspase-3 levels in *X. laevis* (**Figure 7**). We further found that  
32 overexpression of the apoptosis inhibitors *Diap1* and *xiap* rescued the cellular and neuronal  
33 phenotypes observed with knockdown of homologs of 3q29 genes (**Figure 5**), providing  
34 important validations for the potential involvement of apoptosis towards the deletion

1 phenotypes (**Table 1**). We propose that *NCBP2* could modify several cellular and molecular  
2 processes that may not be directly related to apoptosis, but could instead lead to a cascade of  
3 biological events that ultimately result in apoptosis (**Figure 8B**). Apoptosis mechanisms are  
4 well-conserved between *Drosophila*, *X. laevis*, and humans, with key genes such as *XIAP*  
5 (*Diap1*), *CASP2* (*Dronc*), *CASP3* (*DrICE*), and *CASP7* (*Dcp-1*) sharing the same roles in  
6 programmed cell death across the three organisms (Kornbluth and White, 2005; Tittel and  
7 Steller, 2000; Xu et al., 2009). In fact, fly homologs of human genes annotated for apoptosis  
8 function in the Gene Ontology database are also enriched for apoptosis function ( $n=1,063$  fly  
9 homologs from 1,789 human apoptosis genes;  $p=5.30 \times 10^{-13}$ , Fisher's Exact test with  
10 Benjamini-Hochberg correction). Although we focused on testing apoptosis phenotypes upon  
11 knockdown of homologs of 3q29 genes, we note that apoptosis is potentially one of the many  
12 cellular pathways disrupted by the 3q29 deletion (**Figure 8B**). In fact, our data implicated  
13 knockdown of several homologs of 3q29 genes, including *dlg1* and *CG8888* (*BDHI*),  
14 towards abnormal cell proliferation during development. Furthermore, several 3q29 genes  
15 have been previously associated with apoptosis or cell cycle regulation functions  
16 (**Supplementary File 1**). For example, *DLG1* is a tumor suppressor gene whose knockdown  
17 in *Drosophila* leads to neoplasms in the developing brain and eye disc (Bilder et al., 2000;  
18 Humbert et al., 2003), while *PAK2* is a key downstream mediator of the ERK signaling  
19 pathway for neuronal extension and is activated by caspases during apoptosis (Luo and  
20 Rubinsztein, 2009; Marlin et al., 2011; Shin et al., 2002). Our results recapitulate the role of  
21 *DLG1* towards cell cycle regulation, and also implicate *NCBP2* and its interactions towards  
22 multiple cellular and developmental phenotypes.

23 More broadly, genes involved with apoptosis and cell proliferation have been  
24 implicated in several neurodevelopmental disorders. For example, we previously observed  
25 disrupted cell proliferation upon knockdown of *Drosophila* homologs of genes in the 16p11.2  
26 deletion region, as well as an enrichment of cell cycle genes as connector genes in a human  
27 brain-specific network of interactions between 16p11.2 genes (Iyer et al., 2018). Furthermore,  
28 abnormal apoptosis in the early developing brain has been suggested as a possible mechanism  
29 for the decreased number of neurons observed in individuals with autism and schizophrenia  
30 (Courchesne et al., 2011; Glantz et al., 2006; Kreczmanski et al., 2007). For example,  
31 increased apoptosis was observed in both postmortem brain tissue from autism patients  
32 (Dong et al., 2018) and primary fibroblasts from schizophrenia patients (Batalla et al., 2015;  
33 Gassó et al., 2014). We found further support for the role of apoptosis in these disorders by  
34 identifying significant enrichments for genes associated with apoptotic processes among



1 candidate genes for autism (empirical  $p < 1.00 \times 10^{-5}$ ) (Abrahams et al., 2013), intellectual  
2 disability ( $p < 1.00 \times 10^{-5}$ ) (Thormann et al., 2019), and schizophrenia ( $p = 0.014$ ) (Purcell et al.,  
3 2014) (**Figure 8—Figure Supplement 2**). In fact, out of the 525 neurodevelopmental genes  
4 involved in apoptosis, 20 genes were present within pathogenic CNV regions (Girirajan et al.,  
5 2012), including *CORO1A*, *MAPK3* and *TAOK2* in the 16p11.2 region and *TBX1*, the  
6 causative gene for heart defects in DiGeorge/velocardiofacial syndrome (Lindsay et al., 2001)  
7 (**Supplementary File 4**). In addition to neuropsychiatric disorders, apoptosis has also been  
8 implicated in syndromic forms of microcephaly in humans (Poulton et al., 2011) as well as  
9 decreased brain size in animal models of microcephaly genes (Faheem et al., 2015; Silver et  
10 al., 2010). For example, a mouse model of the Nijmegen breakage syndrome gene *NBN*  
11 exhibited increased neuronal apoptosis leading to microcephaly and decreased body mass  
12 (Frappart et al., 2005). Overall, these findings highlight the importance of cell cycle-related  
13 processes, particularly apoptosis and proliferation, towards modulating neuronal phenotypes  
14 that could be responsible for developmental disorders.

15 In this study, the use of *Drosophila* and *X. laevis* models, both of which are amenable  
16 to high-throughput screening of developmental phenotypes, allowed us to systematically  
17 examine the conserved cellular and mechanistic roles of homologs of 3q29 genes and their  
18 interactions. Follow-up studies in more evolutionarily advanced systems, such as mouse or  
19 human cell lines, will be useful to overcome limitations of the *Drosophila* and *X. laevis*  
20 models, including testing the neurodevelopmental phenotypes and interactions of 3q29 genes  
21 without fly homologs. Collectively, these results emphasize the utility of quantitative  
22 functional assays for identifying conserved pathways associated with neurodevelopmental  
23 disorders, which will hopefully allow for future discoveries of treatments for these disorders.

24

## 1 MATERIALS AND METHODS

### 2 Fly stocks and genetics

3 Using reciprocal BLAST searches and ortholog predictions from the *DIOPT* v.7.1 database  
4 (Hu et al., 2011), we identified 15 fly homologs for the 21 human genes within the  
5 chromosome 3q29 region (**Figure 1—Figure Supplement 1**). No fly homologs were present  
6 for six genes, including *LRRC33*, *CEP19*, *RNF168*, *SMCO1*, *TFRC*, and *TM4SF19*. We used  
7 a similar strategy to identify homologs for other neurodevelopmental genes tested for  
8 interactions in this study. Gene Ontology-Slim (GO-Slim) terms for each human gene and fly  
9 homolog were obtained from PantherDB (Mi et al., 2017) and are provided in  
10 **Supplementary File 1**. RNAi lines for fly homologs were obtained from the Vienna  
11 *Drosophila* Resource Centre (Dietzl et al., 2007) (VDRC), including both KK and GD lines,  
12 and the Bloomington *Drosophila* Stock Centre (BDSC) (NIH P40OD018537). A list of fly  
13 RNAi lines used in this study is provided in **Supplementary File 2**. Fly RNAi lines for  
14 homologs of 3q29 genes were tested for gene knockdown using quantitative real-time PCR  
15 (**Figure 1—Figure Supplement 1**). As the available KK line for CG5359 (*TCTEXID2*)  
16 showed a wing phenotype consistent with *tiptop* overexpression due to RNAi insertion at the  
17 5'UTR of the gene (Green et al., 2014), which we confirmed using qPCR analysis  
18 (**Supplementary File 5**), we excluded the gene from our experiments. Microarray data and  
19 modENCODE Anatomy RNA-Seq from FlyBase (Chintapalli et al., 2007; Graveley et al.,  
20 2011) showed that all of the 14 tested homologs were expressed in the fly central nervous  
21 system and eye tissues (**Figure 1—Figure Supplement 1**).

22 All fly stocks and crosses were cultured on conventional cornmeal-sucrose-dextrose-  
23 yeast medium at 25°C, unless otherwise indicated. RNAi lines were crossed with a series of  
24 *GAL4* driver lines to achieve tissue-specific knockdown of genes, including  $w^{1118};da-GAL4$   
25 (Scott Selleck, Penn State) for ubiquitous,  $w^{1118};dCad-GFP$ ,  $GMR-GAL4/CyO$  (Zhi-Chun Lai,  
26 Penn State) and  $w^{1118};GMR-GAL4;UAS-Dicer2$  (Claire Thomas, Penn State) for eye-specific,  
27  $w^{1118};beadex^{MS1096}-GAL4;;UAS-Dicer2$  (Zhi-Chun Lai, Penn State) for wing-specific, and  
28  $w^{1118};Elav-GAL4$  (Mike Grotewil, VCU) and  $w^{1118};Elav-GAL4;;UAS-Dicer2$  (Scott Selleck,  
29 Penn State) for pan-neuronal knockdown of gene expression. A list of full genotypes for all  
30 crosses tested in this study is provided in **Supplementary File 2**. To perform interaction  
31 studies, we generated recombinant stock lines of *GMR-GAL4* with reduced expression of nine  
32 select homologs of 3q29 genes (**Figure 3—Figure Supplement 1**). Females from these  
33 stocks with constitutively reduced gene expression for each of these genes were crossed with

1 RNAi lines of other homologs to achieve simultaneous knockdown of two genes (**Figure 1**).  
2 We previously demonstrated that these two-hit crosses had adequate *GAL4* to bind to two  
3 independent *UAS-RNAi* constructs (Iyer et al., 2018).

#### 5 **Quantitative real-time polymerase chain reaction for *Drosophila* RNAi knockdowns**

6 Levels of gene expression knockdown were confirmed using quantitative real-time PCR (RT-  
7 PCR) on RNA isolated from pooled groups of 35 fly heads per line tested (**Figure 1—Figure**  
8 **Supplement 2**). Briefly, RNAi lines were crossed with *Elav-GAL4* (to test RNAi line  
9 efficacy) or *Elav-GAL4;;UAS-Dicer2* (to test for *tiptop* overexpression) at 25°C to achieve  
10 pan-neuronal knockdown of the fly homolog. Adult fly heads at day 3 were separated by  
11 vortexing, and total RNA was isolated using TRIzol (Invitrogen, Carlsbad, CA, USA). cDNA  
12 was prepared using the qScript cDNA synthesis kit (Quantabio, Beverly, MA, USA).  
13 Quantitative real-time PCR (qPCR) was performed using an Applied Biosystems Fast 7500  
14 system with SYBR Green PCR master mix (Quantabio) to estimate the level of gene  
15 expression. Primers were designed using NCBI Primer-BLAST (Ye et al., 2012), with primer  
16 pairs separated by an intron in the corresponding genomic DNA. All experiments were  
17 performed using three biological replicates. A list of primers used in the experiments is  
18 provided in **Figure 1—Figure Supplement 2**. The delta-delta Ct value method was used to  
19 obtain the relative expression of fly homologs in the RNAi lines compared with *Elav-GAL4*  
20 controls (Livak and Schmittgen, 2001).

21

#### 22 **Climbing assay**

23 We set up fly crosses at 25°C with *Elav-GAL4* to obtain pan-neuronal knockdown for select  
24 homologs of 3q29 genes. For each RNAi line tested, groups of ten female flies were first  
25 allowed to adjust at room temperature for 30 minutes and then transferred to a climbing  
26 apparatus, made by joining two vials, and allowed to adjust for 5 minutes. The flies were  
27 tapped down to the bottom, and the number of flies climbing past the 8 cm mark measured  
28 from the bottom of the apparatus in 10 seconds was then counted (**Videos 1-2**). This assay  
29 was repeated nine additional times for each group, with a one-minute rest between trials. The  
30 sets of 10 trials for each group were repeated daily for ten days, capturing data from 100  
31 replicates from day 1 until day 10, starting the experiments with 1-2-day old flies. All  
32 experiments were performed during the same time of the day for consistency of results.

33

34

## 1 **Imaging of adult fly eyes and wings**

2 We crossed RNAi lines with *GMR-GAL4* and reared at 29°C for eye-specific knockdown and  
3 *beadex<sup>MS1096</sup>-GAL4* at 25°C for wing-specific knockdown. For eye imaging, adult 2-3-day old  
4 female progenies from the crosses were collected, immobilized by freezing at -80°C,  
5 mounted on Blu-tac (Bostik Inc, Wauwatosa, WI, USA), and imaged using an Olympus  
6 BX53 compound microscope with LMPLan N 20X air objective using a DP73 c-mount  
7 camera at 0.5X magnification and a z-step size of 12.1µm. (Olympus Corporation, Tokyo,  
8 Japan). We used CellSens Dimension software (Olympus Corporation, Tokyo, Japan) to  
9 capture the images, and stacked the image slices using Zerene Stacker (Zerene Systems LLC,  
10 Richland, WA, USA). All eye images presented in this study are maximum projections of 20  
11 consecutive optical z-sections. Adult wings were plucked from 2-5 day old female flies,  
12 mounted on a glass slide, covered with a coverslip and sealed with clear nail polish. The  
13 wings were imaged using a Zeiss Discovery V20 stereoscope (Zeiss, Thornwood, NY, USA)  
14 with ProgRes Speed XT Core 3 camera (Jenoptik AG, Jena, Germany) using a 40X objective,  
15 and images were captured with ProgRes CapturePro v.2.8.8.

16

## 17 **Quantitative phenotyping of fly eyes using *Flynotyper***

18 We used a computational method called *Flynotyper* (<https://flynotyper.sourceforge.net>) to  
19 measure the degree of roughness of the adult eyes (Iyer et al., 2016). The software uses an  
20 algorithm to detect the center of each ommatidium, and calculates a phenotypic score based  
21 on the number of ommatidia detected, the lengths of six local vectors with direction pointing  
22 from each ommatidium to the neighboring ommatidia, and the angle between these six local  
23 vectors (**Figure 2—Figure Supplement 3A**). Using *Flynotyper*, we obtained quantitative  
24 measures for roughness of the fly eye with single gene or pairwise gene knockdown. Eye  
25 areas, ommatidial diameter, and areas of necrotic patches, which may not be reflected in the  
26 *Flynotyper* scores, were measured using ImageJ. Significant pairwise interactions were  
27 reported as “validated” when multiple RNAi or mutant lines, if available, showed the same  
28 phenotype (**Figure 3—Figure Supplement 1, Figure 6—Figure Supplement 1**).

29

## 30 **Immunohistochemistry of eye and wing discs**

31 Third instar larval and 44-hour-old pupal eye discs, reared at 29°C, and third instar larval  
32 wing discs, reared at 25°C, were dissected in 1X phosphate-buffered saline (PBS) and fixed  
33 in 4% paraformaldehyde for 20 minutes. The eye and wing discs were then washed thrice in  
34 PBT (PBS with 0.1% Triton-X) for 10 minutes each, treated with blocking solution (PBS

1 with 1% normal goat serum (NGS) for eye discs, or 1% bovine serum albumin (BSA) for  
2 wing discs) for 30 minutes, and then incubated overnight with primary antibodies at 4°C.  
3 Rabbit anti-cleaved *Drosophila* dcp1 (Asp216) (1:100; 9578S, Cell Signaling Technology,  
4 Danvers, MA, USA), a marker for cells undergoing apoptosis, and Mouse anti-phospho-  
5 Histone H3 (S10) antibody (1:100; 9706L, Cell Signaling Technology), a mitotic marker for  
6 measuring proliferating cells, were used to assay cell proliferation and apoptosis defects in  
7 larval eye and wing discs. Mouse anti-DLG (1:200; 4F3, DSHB, Iowa City, Iowa, USA), a  
8 septate junction marker, and Rhodamine Phalloidin (1:200; R415, Invitrogen Molecular  
9 Probes, Carlsbad, CA, USA), an F-actin marker, were used to visualize and count ommatidial  
10 cells and photoreceptor cells in pupal eyes. Mouse anti-chaoptin (1:200; 24B10, DSHB) was  
11 used to visualize retinal axon projections. Preparations were then washed for 10 minutes  
12 thrice with PBT, and incubated for two hours with fluorophore-conjugated secondary  
13 antibodies (Alexa fluor 568 goat anti-mouse (1:200) (A11031), Alexa fluor 488 goat anti-  
14 mouse (1:200) (A11029), Alexa fluor 647 goat anti-rabbit (1:200) (A21245), and Alexa fluor  
15 647 goat anti-mouse (1:200) (A21236), Invitrogen Molecular Probes, Carlsbad, CA, USA))  
16 with gentle shaking. Preparations were washed thrice in PBT for 10 minutes, and the tissues  
17 were then mounted in Prolong Gold antifade mounting media with DAPI (P36930, Thermo  
18 Fisher Scientific, Waltham, MA, USA) or Vectashield hard set mounting media with DAPI  
19 (H-1500, Vector Laboratories, Burlingame, CA, USA) for imaging.

20

### 21 **Bromouridine staining**

22 Third instar larval eye discs were dissected in 1X PBS and immediately transferred to  
23 Schneider's Insect Media (Sigma-Aldrich, St. Louis, MO). The tissues were then incubated in  
24 10 µM BrdU (Sigma-Aldrich) at 25°C for one hour with constant agitation to allow for  
25 incorporation of BrdU into DNA of replicating cells during the S-phase of cell cycle. The  
26 samples were washed thrice with PBS for five minutes each and fixed in 4%  
27 paraformaldehyde for 20 minutes. To denature DNA, the tissues were acid-treated in 2N HCl  
28 for 20 minutes, neutralized in 100 mM Borax solution for 2 minutes, washed thrice in 10X  
29 PBT (PBS with 0.1% Tween-20) for 10 minutes, and treated with blocking solution (PBS,  
30 0.2% Triton X-100, 5% NGS) for one hour. The tissues were then incubated in mouse anti-  
31 BrdU (1:200; G3G4, DSHB, Iowa City, Iowa, USA) and diluted in blocking solution  
32 overnight at 4°C. The next day, the tissues were washed thrice in PBT for 20 minutes each  
33 and incubated in Alexa fluor 568 goat anti-mouse (1:200, Invitrogen Molecular Probes,  
34 Carlsbad, CA, USA) for two hours with constant agitation. Finally, the samples were

1 mounted in Prolong Gold antifade reagent with DAPI (Thermo Fisher Scientific, Waltham,  
2 MA, USA) for imaging.

3

#### 4 **Terminal deoxynucleotidyl transferase (TUNEL) Assay**

5 The levels of cell death in the developing eye were evaluated by staining using the *In Situ*  
6 Cell Death Detection Kit, TMR Red (Roche, Basel, Switzerland). The third instar larval eye  
7 discs were dissected in 1X PBS and fixed in 4% paraformaldehyde for 20 minutes at room  
8 temperature, followed by three 10-minute washes with PBS. The dissected tissues were  
9 permeabilized by treating with 20 µg/ml proteinase K (Sigma-Aldrich, St. Louis, MO, USA)  
10 for two minutes, washed thrice in PBT (PBS with 0.1% Triton-X) for 5 minutes each, fixed in  
11 4% paraformaldehyde for 15 minutes, and washed thrice again in PBT for 10 minutes each.  
12 The tissues were then incubated overnight with TUNEL (terminal deoxynucleotidyl  
13 transferase dUTP nick end labeling) reaction mixture at 4°C per the manufacturer's  
14 instructions, and washed five times in PBT for 15 minutes each. Finally, tissues were  
15 mounted in Prolong-gold antifade containing DAPI (Thermo Fisher Scientific, Waltham,  
16 MA, USA) for imaging.

17

#### 18 **Confocal imaging and analysis**

19 Confocal images of larval and pupal eye discs were captured using an Olympus Fluoview  
20 FV1000 laser scanning confocal microscope (Olympus America, Lake Success,  
21 NY). Maximum projections of all optical sections were generated for display. To account  
22 for decreased expression of DLG in flies with knockdown of *dlg1*, the laser intensity used  
23 to image DLG staining in pupal eyes of these flies was increased to 530-570V, compared  
24 with 400-490V in control flies. Acquisition and processing of images was performed with  
25 the Fluoview software (Olympus Corporation, Tokyo, Japan), and the z-stacks of images  
26 were merged using ImageJ (Schneider et al., 2012). The number of pH3, BrdU, TUNEL, and  
27 dcp1-positive cells from larval eye discs were counted using two ImageJ plugins,  
28 AnalyzeParticles and Image-based Tool for Counting Nuclei (ITCN). As we found a strong  
29 correlation (Pearson correlation,  $r=0.736$ ,  $p<2.2\times 10^{-16}$ ) between the two methods (**Figure 2—**  
30 **Figure Supplement 3D**), all cell counts displayed for eye data were derived from ITCN  
31 analysis. Proliferating cells in larval wing discs stained with pH3 were counted using  
32 AnalyzeParticles, and apoptotic cells in wing discs stained with dcp1 were analyzed using  
33 manual counting.

34



## 1 **Differential expression analysis of transcriptome data**

2 We performed RNA sequencing (RNA-Seq) of samples isolated from three biological  
3 replicates of 35 fly heads each for individual (*Cbp20*, *dlg1*, *Fsn*, *Pak*) and pairwise  
4 (*Cbp20/dlg1*, *Cbp20/Fsn*) *Elav-GAL4* mediated knockdowns of homologs of 3q29 genes. We  
5 compared gene expression levels of each cross to VDRC control flies carrying the same  
6 genetic background (GD or KK control lines crossed with *Elav-GAL4*). We prepared cDNA  
7 libraries for the three biological replicates per genotype using TruSeq Stranded mRNA LT  
8 Sample Prep Kit (Illumina, San Diego, CA), and performed single-end sequencing using  
9 Illumina HiSeq 2000 at the Penn State Genomics Core Facility to obtain 100 bp reads at an  
10 average coverage of 36.0 million aligned reads/sample. We used Trimmomatic v.0.36  
11 (Bolger et al., 2014) for quality control assessment, TopHat2 v.2.1.1 (Kim et al., 2013) to  
12 align the raw sequencing data to the reference fly genome and transcriptome (build 6.08), and  
13 HTSeq-Count v.0.6.1 (Anders et al., 2015) to calculate raw read counts for each gene. edgeR  
14 v.3.20.1 (Robinson et al., 2009) (generalized linear model option) was used to perform  
15 differential expression analysis, and genes with log<sub>2</sub>-fold changes >1 or <-1 and false-  
16 discovery rates <0.05 (Benjamini-Hochberg correction) were considered to be differentially  
17 expressed (**Supplementary File 3**). Human homologs of differentially-expressed fly genes  
18 (top matches for each fly gene, excluding matches with “low” rank) were identified using  
19 DIOPT (Hu et al., 2011). Enrichment analysis of Panther GO-Slim Biological Process terms  
20 among the differentially-expressed fly genes and their human homologs was performed using  
21 the PantherDB Gene List Analysis tool (Mi et al., 2017). Enrichments for genes preferentially  
22 expressed in the developing brain were calculated using the Cell-type Specific Expression  
23 Analysis tool (Dougherty et al., 2010) based on expression data from the BrainSpan Atlas  
24 (Miller et al., 2014).

25

## 26 ***X. laevis* embryos**

27 Eggs collected from female *X. laevis* frogs were fertilized *in vitro*, dejellied, and cultured  
28 following standard methods (Lowery et al., 2012; Sive et al., 2010). Embryos were staged  
29 according to Nieuwkoop and Faber (Nieuwkoop and Faber, 1994). All *X. laevis* experiments  
30 were approved by the Boston College Institutional Animal Care and Use Committee  
31 (Protocol #2016-012) and were performed according to national regulatory standards.

32

33

34



## 1 **Morpholino and RNA constructs**

2 Morpholinos (MOs) were targeted to early splice sites of *X. laevis ncbp2*, *fbxo45*, *pak2*, or  
3 standard control MO, purchased from Gene Tools LLC (Philomath, OR, USA). MO  
4 sequences are listed in **Figure 7—Figure Supplement 3**. For knockdown experiments, all  
5 MOs were injected at either the 2-cell or 4-cell stage, with embryos receiving injections two  
6 or four times total in 0.1X MMR containing 5% Ficoll. Control and *fbxo45* MOs were  
7 injected at 10ng/embryo, *ncbp2* and control MOs were injected at 20ng/embryo, and *pak2*  
8 and control MOs were injected at 50ng/embryo. For rescue experiments, the same amounts of  
9 MOs used in the KD experiments were injected along with gene-specific mRNA tagged with  
10 GFP (800pg/embryo for *xiap*-GFP; 1000pg/embryo for *ncbp2*-GFP and *fbxo45*-GFP, and  
11 300pg/embryo for *pak2*-GFP) in the same injection solution. Capped mRNAs were  
12 transcribed *in vitro* using SP6 or T7 mMessage mMachine Kit (Thermo Fisher Scientific,  
13 Waltham, MA, USA). RNA was purified with LiCl precipitation. *X. laevis ncbp2*, *fbxo45*,  
14 *pak2*, and *xiap* ORFs obtained from the European *Xenopus* Resource Center (EXRC,  
15 Portsmouth, UK) were gateway-cloned into pCSf107mT-GATEWAY-3'GFP destination  
16 vectors. Constructs used included *NCBP2*-GFP, *FBXO45*-GFP, *PAK2*-GFP, *XIAP*-GFP, and  
17 GFP in pCS2+. Embryos either at the 2-cell or 4-cell stage received four injections in 0.1X  
18 MMR containing 5% Ficoll with the following total mRNA amount per embryo: 300pg of  
19 GFP, 800pg of *xiap*-GFP, 1000pg of *ncbp2*-GFP, 1000pg of *fbxo45*-GFP, and 300pg of *pak2*-  
20 GFP.

21

## 22 **RT-PCR for *X. laevis* morpholino knockdown**

23 Morpholino validation and knockdown was assessed using RT-PCR. Total RNA was  
24 extracted using TRIzol reagent (Life Technologies, Grand Island, NY, USA), followed by  
25 chloroform extraction and ethanol precipitation from 2-day old embryos injected with  
26 increasing concentrations of MO targeted to each homolog of the tested 3q29 gene. cDNA  
27 synthesis was performed with SuperScript II Reverse Transcriptase (Life Technologies,  
28 Grand Island, NY, USA) and random hexamers. PCR primers are listed in **Figure 7—Figure**  
29 **Supplement 4**. RT-PCR was performed in triplicate (**Figure 7—Figure Supplement 1A**),  
30 with band intensities quantified by densitometry in ImageJ and normalized to the uninjected  
31 control mean relative to *ODCI*, which was used as a housekeeping control.

32

## 33 **Brain and eye morphology assays**

34 In brain morphology experiments, all embryos received two injections at the 2-cell stage in

1 0.1X MMR containing 5% Ficoll. One cell was left uninjected and the other cell was injected  
2 with either control MO or MO targeted to the tested 3q29 gene, along with 300pg of GFP  
3 mRNA in the same injection solution. Stage 47 tadpoles were fixed in 4% PFA diluted in  
4 PBS for one hour, rinsed in PBS and gutted to reduce autofluorescence. Embryos were  
5 incubated in 3% bovine serum albumin and 1% Triton-X 100 in PBS for two hours, and then  
6 incubated in anti-acetylated tubulin primary antibody (1:500, monoclonal, clone 6-11B-1,  
7 AB24610, Abcam, Cambridge, UK) and goat anti-mouse Alexa fluor 488 conjugate  
8 secondary antibody (1:1000, polyclonal, A11029, Invitrogen Life Technologies, Carlsbad,  
9 CA). Embryos were then rinsed in 1% PBS-Tween and imaged in PBS. Skin dorsal to the  
10 brain was removed if the brain was not clearly visible due to pigment. For eye phenotype  
11 experiments, all embryos received four injections at the 2-cell or 4-cell stage in 0.1X MMR  
12 containing 5% Ficoll with either the control MO or MOs targeted to each 3q29 gene. Stage  
13 42 tadpoles were fixed in 4% PFA diluted in PBS. Tadpoles were washed three times in 1%  
14 PBS-Tween for one hour at room temperature before imaging.

15

#### 16 ***X. laevis* image acquisition and analysis**

17 Lateral view images of stage 42 tadpoles for eye experiments and dorsal view images of stage  
18 47 tadpoles for brain experiments were each collected on a SteREO Discovery.V8  
19 microscope using a Zeiss 5X objective and Axiocam 512 color camera (Zeiss, Thornwood,  
20 NY, USA). Areas of the left and right eye, forebrain, and midbrain were determined from raw  
21 images using the polygon area function in ImageJ. Eye size was quantified by taking the  
22 average area of both the left and right eye, while forebrain and midbrain area were quantified  
23 by taking the ratio between the injected side versus the uninjected side for each sample.

24

#### 25 **Western blot for apoptosis**

26 Two replicate western blot experiments were performed to test for apoptosis markers in *X.*  
27 *laevis* with 3q29 gene knockdown (**Figure 7—Figure Supplement 1**). Embryos at stages 20-  
28 22 were lysed in buffer (50mM Tris pH 7.5, 1% NP40, 150mM NaCl, 1mM PMSF, 0.5 mM  
29 EDTA) supplemented with cComplete Mini EDTA-free Protease Inhibitor Cocktail (Sigma-  
30 Aldrich, Basel, Switzerland). Blotting was carried out using rabbit polyclonal antibody to  
31 cleaved caspase-3 (1:500, 9661S, Cell Signaling Technology, Danvers, MA, USA), with  
32 mouse anti-beta actin (1:2500, AB8224, Abcam, Cambridge, UK) as a loading control.  
33 Chemiluminescence detection was performed using Amersham ECL western blot reagent  
34 (GE Healthcare Bio-Sciences, Pittsburgh, PA, USA). Band intensities were quantified by

1 densitometry in ImageJ and normalized to the control mean relative to beta-actin. Due to the  
2 low number of replicates, we did not perform any statistical tests on data derived from these  
3 experiments.

#### 4 5 **Human brain-specific network analysis of 3q29 gene interactions**

6 We used a human brain-specific gene interaction network that was previously built using a  
7 Bayesian classifier trained on gene co-expression datasets (Greene et al., 2015; Krishnan et  
8 al., 2016). We extracted interactions with predicted weights  $>2.0$  (containing the top 0.5%  
9 most likely interactions), and measured the distance of the shortest paths connecting pairs of  
10 3q29 genes within the network, excluding genes without connectivity in the network from  
11 final calculations. As a control, we also measured the connectivity of 500 randomly selected  
12 genes with 100 replicates each of 20 other random genes. All network analysis was  
13 performed using the NetworkX Python package (Hagberg et al., 2008).

#### 14 15 **Overlap between neurodevelopmental and apoptosis gene sets**

16 We obtained a set of 1,794 genes annotated with the Gene Ontology term for apoptotic  
17 processes (GO:0006915) or children terms from the Gene Ontology Consortium (AmiGO  
18 v.2.4.26) (Carbon et al., 2009), and compared this gene set to sets of 756 candidate autism  
19 genes (SFARI Gene Tiers 1-4) (Abrahams et al., 2013), 1,854 candidate intellectual disability  
20 genes (Thormann et al., 2019), and 2,546 curated candidate schizophrenia genes (Purcell et  
21 al., 2014). Genes in these three sets that were annotated for apoptosis function are listed in  
22 **Supplementary File 4**. To determine the statistical significance of these overlaps, we  
23 performed 100,000 simulations to identify the number of apoptosis genes among groups of  
24 genes randomly selected from the genome, and determined the percentiles for each observed  
25 overlap among the simulated overlaps as empirical p-values.

#### 26 27 **Statistical analysis**

28 Details of each dataset and the associated statistical tests are provided in **Supplementary File**  
29 **5**. All statistical analyses of functional data were performed using R v.3.4.2 (R Foundation  
30 for Statistical Computing, Vienna, Austria). Non-parametric one-tailed and two-tailed Mann-  
31 Whitney tests were used to analyze *Drosophila* functional data and human network data, as  
32 several datasets were not normally distributed ( $p < 0.05$ , Shapiro-Wilk tests for normality).  
33 Climbing ability and survival data for each fly RNAi line across each experiment day were  
34 analyzed using two-way and one-way repeated values ANOVA tests with post-hoc pairwise

1 t-tests. We also used parametric t-tests to analyze *Drosophila* qPCR data and all *X. laevis*  
2 data, as these data were either normally distributed ( $p > 0.05$ , Shapiro-Wilk tests for normality)  
3 or had a robust sample size ( $n > 30$ ) for non-normality. All p-values from statistical tests  
4 derived from similar sets of experiments (i.e. *Flyntyper* scores for pairwise interactions,  
5 dcp1 rescue experiments with *Diap1*) were corrected using Benjamini-Hochberg correction.

## 6 7 **Reproducibility**

8 *Drosophila* eye area and pH3 and TUNEL staining experiments for select individual  
9 knockdown lines, as well as climbing ability experiments for a subset of individual and  
10 pairwise knockdown lines, were performed on two independent occasions with similar  
11 sample sizes. Data displayed in the main figures were derived from single batches, while data  
12 from the repeated experiments are shown in **Figure 2—Figure Supplement 9**. *X. laevis* brain  
13 and eye area experiments were performed on three independent occasions, with the data  
14 shown in the figures representing pooled results of each of the three experimental batches  
15 (normalized to the respective controls from each batch). *X. laevis* qPCR experiments were  
16 performed three times and western blot experiments were performed twice, with the  
17 blots/gels for each replicate experiment shown in **Figure 7—Figure Supplement 1**. Sample  
18 sizes for each experiment were determined by testing all available organisms; no prior power  
19 calculations for sample size estimation were performed. No data points or outliers were  
20 excluded from the experiments presented in the manuscript.

21

## 22 **Data availability**

23 Gene expression data for the six *Drosophila* individual and pairwise RNAi knockdown of  
24 homologs of 3q29 genes are deposited in the GEO (Gene Expression Omnibus) database with  
25 accession code GSE128094, and the raw RNA Sequencing files are deposited in the SRA  
26 (Sequence Read Archive) with BioProject accession PRJNA526450. All other data generated  
27 and analyzed in study are included in the manuscript and supporting files. All unique  
28 biological materials described in the manuscript, such as recombinant fly stocks, are readily  
29 available from the authors upon request.

30

## 31 **Code availability**

32 All source code and datasets for generating genomic data (RNA-Seq, network analysis, and  
33 neurodevelopment/apoptosis gene overlap) are available on the Girirajan lab GitHub page at  
34 [https://github.com/girirajanlab/3q29\\_project](https://github.com/girirajanlab/3q29_project).

1    **ACKNOWLEDGMENTS**

2    We thank A. Krishnan for assistance with the brain-specific gene interaction network  
3    analysis, J. Tiber for technical assistance with the *X. laevis* experiments, and V. Faundez  
4    for useful discussions and critical reading of the manuscript. This work was supported by a  
5    Basil O'Connor Award from the March of Dimes Foundation (#5-FY14-66), NIH R01-  
6    GM121907, a NARSAD Young Investigator Grant from the Brain and Behavior Research  
7    Foundation (22535), and resources from the Huck Institutes of the Life Sciences to S.G.,  
8    NIH T32-GM102057 to M.J., and NIH R01-MH109651 to L.A.L. The funders had no role  
9    in study design, data collection and interpretation, or the decision to submit the work for  
10   publication

11

12

13    **COMPETING INTERESTS**

14    The authors declare that they have no competing interests.

## 1 REFERENCES

- 2 Abrahams BS, Arking DE, Campbell DB, Mefford HC, Morrow EM, Weiss LA, Menashe I,  
3 Wadkins T, Banerjee-Basu S, Packer A. 2013. SFARI Gene 2.0: A community-driven  
4 knowledgebase for the autism spectrum disorders (ASDs). *Mol Autism* **4**:36.  
5 doi:10.1186/2040-2392-4-36
- 6 Anders S, Pyl PT, Huber W. 2015. HTSeq-A Python framework to work with high-  
7 throughput sequencing data. *Bioinformatics* **31**:166–169.  
8 doi:10.1093/bioinformatics/btu638
- 9 Andrews T, Meader S, Vulto-van Silfhout A, Taylor A, Steinberg J, Hehir-Kwa J, Pfundt R,  
10 de Leeuw N, de Vries BBA, Webber C. 2015. Gene Networks Underlying Convergent  
11 and Pleiotropic Phenotypes in a Large and Systematically-Phenotyped Cohort with  
12 Heterogeneous Developmental Disorders. *PLoS Genet* **11**:e1005012.  
13 doi:10.1371/journal.pgen.1005012
- 14 Armstrong JD, Texada MJ, Munjaal R, Baker DA, Beckingham KM. 2006. Gravitaxis in  
15 *Drosophila melanogaster*: A forward genetic screen. *Genes, Brain Behav* **5**:222–239.  
16 doi:10.1111/j.1601-183X.2005.00154.x
- 17 Baba M, Yokoyama K, Seiriki K, Naka Y, Matsumura K, Kondo M, Yamamoto K,  
18 Hayashida M, Kasai A, Ago Y, Nagayasu K, Hayata-Takano A, Takahashi A,  
19 Yamaguchi S, Mori D, Ozaki N, Yamamoto T, Takuma K, Hashimoto R, Hashimoto H,  
20 Nakazawa T. 2019. Psychiatric-disorder-related behavioral phenotypes and cortical  
21 hyperactivity in a mouse model of 3q29 deletion syndrome. *Neuropsychopharmacology*.  
22 doi:10.1038/s41386-019-0441-5
- 23 Ballif BC, Theisen A, Coppinger J, Gowans GC, Hersh JH, Madan-Khetarpal S, Schmidt KR,  
24 Tervo R, Escobar LF, Friedrich CA, McDonald M, Campbell L, Ming JE, Zackai EH,  
25 Bejjani BA, Shaffer LG. 2008. Expanding the clinical phenotype of the 3q29  
26 microdeletion syndrome and characterization of the reciprocal microduplication. *Mol*  
27 *Cytogenet* **1**:8. doi:10.1186/1755-8166-1-8
- 28 Batalla A, Bargalló N, Gassó P, Molina O, Pareto D, Mas S, Roca JM, Bernardo M, Lafuente  
29 A, Parellada E. 2015. Apoptotic markers in cultured fibroblasts correlate with brain  
30 metabolites and regional brain volume in antipsychotic-naïve first-episode schizophrenia  
31 and healthy controls. *Transl Psychiatry* **5**:e626. doi:10.1038/tp.2015.122
- 32 Bilder D, Li M, Perrimon N. 2000. Cooperative regulation of cell polarity and growth by  
33 *Drosophila* tumor suppressors. *Science* **289**:113–6.
- 34 Bilen J, Bonini NM. 2007. Genome-wide screen for modifiers of ataxin-3 neurodegeneration  
35 in *Drosophila*. *PLoS Genet* **3**:1950–64. doi:10.1371/journal.pgen.0030177
- 36 Bolger AM, Lohse M, Usadel B. 2014. Trimmomatic: A flexible trimmer for Illumina  
37 sequence data. *Bioinformatics* **30**:2114–2120. doi:10.1093/bioinformatics/btu170
- 38 Brand AH, Perrimon N. 1993. Targeted gene expression as a means of altering cell fates and  
39 generating dominant phenotypes. *Development* **118**:401–15.
- 40 Budnik V, Koh YH, Guan B, Hartmann B, Hough C, Woods D, Gorczyca M. 1996.  
41 Regulation of synapse structure and function by the *Drosophila* tumor suppressor gene  
42 *dlg*. *Neuron* **17**:627–40.
- 43 Bult CJ, Blake JA, Smith CL, Kadin JA, Richardson JE, Anagnostopoulos A, Asabor R,



- 1 Baldarelli RM, Beal JS, Bello SM, Blodgett O, Butler NE, Christie KR, Corbani LE,  
2 Creelman J, Dolan ME, Drabkin HJ, Giannatto SL, Hale P, Hill DP, Law M, Mendoza  
3 A, McAndrews M, Miers D, Motenko H, Ni L, Onda H, Perry M, Recla JM, Richards-  
4 Smith B, Sitnikov D, Tomczuk M, Tonorio G, Wilming L, Zhu Y. 2019. Mouse  
5 Genome Database (MGD) 2019. *Nucleic Acids Res* **47**:D801–D806.  
6 doi:10.1093/nar/gky1056
- 7 Cagan RL, Ready DF. 1989. The emergence of order in the *Drosophila* pupal retina. *Dev Biol*  
8 **136**:346–362. doi:10.1016/0012-1606(89)90261-3
- 9 Carbon S, Ireland A, Mungall CJ, Shu S, Marshall B, Lewis S, Lomax J, Mungall C, Hitz B,  
10 Balakrishnan R, Dolan M, Wood V, Hong E, Gaudet P. 2009. AmiGO: Online access to  
11 ontology and annotation data. *Bioinformatics* **25**:288–289.  
12 doi:10.1093/bioinformatics/btn615
- 13 Chen S-Y, Huang P-H, Cheng H-J. 2011. Disrupted-in-Schizophrenia 1-mediated axon  
14 guidance involves TRIO-RAC-PAK small GTPase pathway signaling. *Proc Natl Acad*  
15 *Sci* **108**:5861–6. doi:10.1073/pnas.1018128108
- 16 Chintapalli VR, Wang J, Dow JAT. 2007. Using FlyAtlas to identify better *Drosophila*  
17 melanogaster models of human disease. *Nat Genet* **39**:715–720. doi:10.1038/ng2049
- 18 Coba MP, Ramaker MJ, Ho E V, Thompson SL, Komiyama NH, Grant SGN, Knowles JA,  
19 Dulawa SC. 2018. *Dlgap1* knockout mice exhibit alterations of the postsynaptic density  
20 and selective reductions in sociability. *Sci Rep* **8**:2281. doi:10.1038/s41598-018-20610-y
- 21 Coe BP, Girirajan S, Eichler EE. 2012. A genetic model for neurodevelopmental disease.  
22 *Curr Opin Neurobiol* **22**:829–836. doi:10.1016/j.conb.2012.04.007
- 23 Courchesne E, Mouton PR, Calhoun ME, Semendeferi K, Ahrens-Barbeau C, Hallet MJ,  
24 Barnes CC, Pierce K. 2011. Neuron number and size in prefrontal cortex of children  
25 with autism. *JAMA* **306**:2001–2010. doi:10.1001/jama.2011.1638
- 26 Cukier HN, Perez AM, Collins AL, Zhou Z, Zoghbi HY, Botas J. 2008. Genetic modifiers of  
27 MeCP2 function in *Drosophila*. *PLoS Genet* **4**:e1000179.  
28 doi:10.1371/journal.pgen.1000179
- 29 Dickman DK, Davis GW. 2009. The Schizophrenia Susceptibility Gene *dysbindin* Controls  
30 Synaptic Homeostasis. *Science* **326**:1127–1130. doi:10.1126/science.1179685
- 31 Dietzl G, Chen D, Schnorrer F, Su K-C, Barinova Y, Fellner M, Gasser B, Kinsey K, Oettel  
32 S, Scheiblauer S, Couto A, Marra V, Keleman K, Dickson BJ. 2007. A genome-wide  
33 transgenic RNAi library for conditional gene inactivation in *Drosophila*. *Nature*  
34 **448**:151–6. doi:10.1038/nature05954
- 35 Dong D, Zielke HR, Yeh D, Yang P. 2018. Cellular stress and apoptosis contribute to the  
36 pathogenesis of autism spectrum disorder. *Autism Res* **11**:1076–1090.  
37 doi:10.1002/aur.1966
- 38 Dougherty JD, Schmidt EF, Nakajima M, Heintz N. 2010. Analytical approaches to RNA  
39 profiling data for the identification of genes enriched in specific cells. *Nucleic Acids Res*  
40 **38**:4218–4230. doi:10.1093/nar/gkq130
- 41 Duffney LJ, Zhong P, Wei J, Matas E, Cheng J, Qin L, Ma K, Dietz DM, Kajiwara Y,  
42 Buxbaum JD, Yan Z. 2015. Autism-like Deficits in *Shank3*-Deficient Mice Are Rescued  
43 by Targeting Actin Regulators. *Cell Rep* **11**:1400–1413.



- 1           doi:10.1016/j.celrep.2015.04.064
- 2   Eicher JD, Landowski C, Stackhouse B, Sloan A, Chen W, Jensen N, Lien JP, Leslie R,  
3       Johnson AD. 2015. GRASP v2.0: An update on the Genome-Wide Repository of  
4       Associations between SNPs and Phenotypes. *Nucleic Acids Res* **43**:D799–D804.  
5       doi:10.1093/nar/gku1202
- 6   Ernst C. 2016. Proliferation and Differentiation Deficits are a Major Convergence Point for  
7       Neurodevelopmental Disorders. *Trends Neurosci* **39**:290–299.  
8       doi:10.1016/j.tins.2016.03.001
- 9   Faheem M, Naseer MI, Rasool M, Chaudhary AG, Kumosani TA, Ilyas AM, Pushparaj P,  
10       Ahmed F, Algahtani HA, Al-Qahtani MH, Saleh Jamal H. 2015. Molecular genetics of  
11       human primary microcephaly: an overview. *BMC Med Genomics* **8**:S4.  
12       doi:10.1186/1755-8794-8-S1-S4
- 13   Fenelon K, Mukai J, Xu B, Hsu P-K, Drew LJ, Karayiorgou M, Fischbach GD, MacDermott  
14       AB, Gogos JA. 2011. Deficiency of Dgcr8, a gene disrupted by the 22q11.2  
15       microdeletion, results in altered short-term plasticity in the prefrontal cortex. *Proc Natl*  
16       *Acad Sci* **108**:4447–4452. doi:10.1073/pnas.1101219108
- 17   Frappart P-O, Tong W-M, Demuth I, Radovanovic I, Herceg Z, Aguzzi A, Digweed M,  
18       Wang Z-Q. 2005. An essential function for NBS1 in the prevention of ataxia and  
19       cerebellar defects. *Nat Med* **11**:538–544. doi:10.1038/nm1228
- 20   Gassó P, Mas S, Molina O, Lafuente A, Bernardo M, Parellada E. 2014. Increased  
21       susceptibility to apoptosis in cultured fibroblasts from antipsychotic-naïve first-episode  
22       schizophrenia patients. *J Psychiatr Res* **48**:94–101. doi:10.1016/j.jpsychires.2013.09.017
- 23   Gatto CL, Broadie K. 2011. Drosophila modeling of heritable neurodevelopmental disorders.  
24       *Curr Opin Neurobiol* **21**:834–841. doi:10.1016/j.conb.2011.04.009
- 25   Girirajan S, Campbell CD, Eichler EE. 2011. Human Copy Number Variation and Complex  
26       Genetic Disease. *Annu Rev Genet* **45**:203–226. doi:10.1146/annurev-genet-102209-  
27       163544
- 28   Girirajan S, Eichler EE. 2010. Phenotypic variability and genetic susceptibility to genomic  
29       disorders. *Hum Mol Genet* **19**:R176–87. doi:10.1093/hmg/ddq366
- 30   Girirajan S, Rosenfeld JA, Coe BP, Parikh S, Friedman N, Goldstein A, Filipink RA,  
31       McConnell JS, Angle B, Meschino WS, Nezarati MM, Asamoah A, Jackson KE,  
32       Gowans GC, Martin JA, Carmany EP, Stockton DW, Schnur RE, Penney LS, Martin  
33       DM, Raskin S, Leppig K, Thiese H, Smith R, Aberg E, Niyazov DM, Escobar LF, El-  
34       Khechen D, Johnson KD, Lebel RR, Siefkas K, Ball S, Shur N, McGuire M, Brasington  
35       CK, Spence JE, Martin LS, Clericuzio C, Ballif BC, Shaffer LG, Eichler EE. 2012.  
36       Phenotypic Heterogeneity of Genomic Disorders and Rare Copy-Number Variants. *N*  
37       *Engl J Med* **367**:1321–1331. doi:10.1056/NEJMoa1200395
- 38   Glantz LA, Gilmore JH, Lieberman JA, Jarskog LF. 2006. Apoptotic mechanisms and the  
39       synaptic pathology of schizophrenia. *Schizophr Res* **81**:47–63.  
40       doi:10.1016/j.schres.2005.08.014
- 41   Glassford MR, Rosenfeld JA, Freedman AA, Zwick ME, Mulle JG. 2016. Novel features of  
42       3q29 deletion syndrome: Results from the 3q29 registry. *Am J Med Genet Part A*  
43       **170**:999–1006. doi:10.1002/ajmg.a.37537

- 1 Gonatopoulos-Pournatzis T, Cowling VH. 2014. Cap-binding complex (CBC). *Biochem J*  
2 **457**:231–242. doi:10.1042/bj4580185
- 3 Graveley BR, Brooks AN, Carlson JW, Duff MO, Landolin JM, Yang L, Artieri CG, van  
4 Baren MJ, Boley N, Booth BW, Brown JB, Cherbas L, Davis CA, Dobin A, Li R, Lin  
5 W, Malone JH, Mattiuzzo NR, Miller D, Sturgill D, Tuch BB, Zaleski C, Zhang D,  
6 Blanchette M, Dudoit S, Eads B, Green RE, Hammonds A, Jiang L, Kapranov P,  
7 Langton L, Perrimon N, Sandler JE, Wan KH, Willingham A, Zhang Y, Zou Y,  
8 Andrews J, Bickel PJ, Brenner SE, Brent MR, Cherbas P, Gingeras TR, Hoskins RA,  
9 Kaufman TC, Oliver B, Celniker SE. 2011. The developmental transcriptome of  
10 *Drosophila melanogaster*. *Nature* **471**:473–479. doi:10.1038/nature09715
- 11 Green EW, Fedele G, Giorgini F, Kyriacou CP. 2014. A *Drosophila* RNAi collection is  
12 subject to dominant phenotypic effects. *Nat Methods* **11**:222–223.  
13 doi:10.1038/nmeth.2856
- 14 Greene CS, Krishnan A, Wong AK, Ricciotti E, Zelaya RA, Himmelstein DS, Zhang R,  
15 Hartmann BM, Zaslavsky E, Sealfon SC, Chasman DI, Fitzgerald GA, Dolinski K,  
16 Grosser T, Troyanskaya OG. 2015. Understanding multicellular function and disease  
17 with human tissue-specific networks. *Nat Genet* **47**:569–576. doi:10.1038/ng.3259
- 18 Greenwood S, Struhl G. 1999. Progression of the morphogenetic furrow in the *Drosophila*  
19 eye: the roles of Hedgehog, Decapentaplegic and the Raf pathway. *Development*  
20 **126**:5795–808.
- 21 Grice SJ, Liu J-L, Webber C. 2015. Synergistic Interactions between *Drosophila* Orthologues  
22 of Genes Spanned by De Novo Human CNVs Support Multiple-Hit Models of Autism.  
23 *PLOS Genet* **11**:e1004998. doi:10.1371/journal.pgen.1004998
- 24 Hagberg AA, Schult DA, Swart PJ. 2008. Exploring network structure, dynamics, and  
25 function using NetworkX. 7th Python in Science Conference (SciPy 2008). pp. 11–15.
- 26 Harland RM, Grainger RM. 2011. *Xenopus* research: Metamorphosed by genetics and  
27 genomics. *Trends Genet* **27**:507–515. doi:10.1016/j.tig.2011.08.003
- 28 Hing H, Xiao J, Harden N, Lim L, Lawrence Zipursky S. 1999. Pak functions downstream of  
29 Dock to regulate photoreceptor axon guidance in *Drosophila*. *Cell* **97**:853–863.  
30 doi:10.1016/S0092-8674(00)80798-9
- 31 Hu Y, Flockhart I, Vinayagam A, Bergwitz C, Berger B, Perrimon N, Mohr SE. 2011. An  
32 integrative approach to ortholog prediction for disease-focused and other functional  
33 studies. *BMC Bioinformatics* **12**:357. doi:10.1186/1471-2105-12-357
- 34 Humbert P, Russell S, Richardson H. 2003. Dlg, scribble and Lgl in cell polarity, cell  
35 proliferation and cancer. *BioEssays* **25**:542–553. doi:10.1002/bies.10286
- 36 Iyer J, Singh MD, Jensen M, Patel P, Pizzo L, Huber E, Koerselman H, Weiner AT, Lepanto  
37 P, Vadodaria K, Kubina A, Wang Q, Talbert A, Yennawar S, Badano J, Manak JR,  
38 Rolls MM, Krishnan A, Girirajan S. 2018. Pervasive genetic interactions modulate  
39 neurodevelopmental defects of the autism-associated 16p11.2 deletion in *Drosophila*  
40 *melanogaster*. *Nat Commun* **9**:2548. doi:10.1038/s41467-018-04882-6
- 41 Iyer J, Wang Q, Le T, Pizzo L, Grönke S, Ambegaokar SS, Imai Y, Srivastava A, Troisi BL,  
42 Mardon G, Artero R, Jackson GR, Isaacs AM, Partridge L, Lu B, Kumar JP, Girirajan S.  
43 2016. Quantitative assessment of eye phenotypes for functional genetic studies using

- 1 *Drosophila melanogaster*. *G3 Genes, Genomes, Genet* **6**:1427–1437.  
2 doi:10.1534/g3.116.027060
- 3 Jensen M, Girirajan S. 2019. An interaction-based model for neuropsychiatric features of  
4 copy-number variants. *PLoS Genet* **15**:e1007879. doi:10.1371/journal.pgen.1007879
- 5 Karayiorgou M, Morris MA, Morrow B, Shprintzen RJ, Goldberg R, Borrow J, Gos A,  
6 Nestadt G, Wolyniec PS, Lasseter VK. 1995. Schizophrenia susceptibility associated  
7 with interstitial deletions of chromosome 22q11. *Proc Natl Acad Sci* **92**:7612–6.
- 8 Karayiorgou M, Simon TJ, Gogos JA. 2010. 22q11.2 microdeletions: Linking DNA structural  
9 variation to brain dysfunction and schizophrenia. *Nat Rev Neurosci* **11**:402–416.  
10 doi:10.1038/nrn2841
- 11 Karimi K, Fortriede JD, Lotay VS, Burns KA, Wang DZ, Fisher ME, Pells TJ, James-Zorn C,  
12 Wang Y, Ponferrada VG, Chu S, Chaturvedi P, Zorn AM, Vize PD. 2018. Xenbase: A  
13 genomic, epigenomic and transcriptomic model organism database. *Nucleic Acids Res*  
14 **46**:D861–D868. doi:10.1093/nar/gkx936
- 15 Kim D, Pertea G, Trapnell C, Pimentel H, Kelley R, Salzberg SL. 2013. TopHat2: accurate  
16 alignment of transcriptomes in the presence of insertions, deletions and gene fusions.  
17 *Genome Biol* **14**:R36. doi:10.1186/gb-2013-14-4-r36
- 18 Kim MD, Kamiyama D, Kolodziej P, Hing H, Chiba A. 2003. Isolation of Rho GTPase  
19 effector pathways during axon development. *Dev Biol* **262**:282–293.  
20 doi:10.1016/S0012-1606(03)00393-2
- 21 Kirov G, Pocklington AJ, Holmans P, Ivanov D, Ikeda M, Ruderfer D, Moran J, Chambert K,  
22 Toncheva D, Georgieva L, Grozeva D, Fjodorova M, Wollerton R, Rees E, Nikolov I,  
23 van de Lagemaat LN, Bayés À, Fernandez E, Olason PI, Böttcher Y, Komiyama NH,  
24 Collins MO, Choudhary J, Stefansson K, Stefansson H, Grant SGN, Purcell S, Sklar P,  
25 O'Donovan MC, Owen MJ. 2012. De novo CNV analysis implicates specific  
26 abnormalities of postsynaptic signalling complexes in the pathogenesis of schizophrenia.  
27 *Mol Psychiatry* **17**:142–153. doi:10.1038/mp.2011.154
- 28 Kornbluth S, White K. 2005. Apoptosis in *Drosophila*: Neither fish nor fowl (nor man, nor  
29 worm). *J Cell Sci* **118**:1779–1787. doi:10.1242/jcs.02377
- 30 Kreczmanski P, Heinsen H, Mantua V, Woltersdorf F, Masson T, Ulfing N, Schmidt-Kastner  
31 R, Korr H, Steinbusch HWM, Hof PR, Schmitz C. 2007. Volume, neuron density and  
32 total neuron number in five subcortical regions in schizophrenia. *Brain* **130**:678–692.  
33 doi:10.1093/brain/awl386
- 34 Krishnan A, Zhang R, Yao V, Theesfeld CL, Wong AK, Tadych A, Volfovsky N, Packer A,  
35 Lash A, Troyanskaya OG. 2016. Genome-wide prediction and functional  
36 characterization of the genetic basis of autism spectrum disorder. *Nat Neurosci* **19**:1454–  
37 1462. doi:10.1038/nn.4353
- 38 Kumar JP. 2012. Building an ommatidium one cell at a time. *Dev Dyn* **241**:136–149.  
39 doi:10.1002/dvdy.23707
- 40 Lek M, Karczewski KJ, Minikel E V., Samocha KE, Banks E, Fennell T, O'Donnell-Luria  
41 AH, Ware JS, Hill AJ, Cummings BB, Tukiainen T, Birnbaum DP, Kosmicki JA,  
42 Duncan LE, Estrada K, Zhao F, Zou J, Pierce-Hoffman E, Berghout J, Cooper DN,  
43 Deflaux N, DePristo M, Do R, Flannick J, Fromer M, Gauthier L, Goldstein J, Gupta N,

- 1 Howrigan D, Kiezun A, Kurki MI, Moonshine AL, Natarajan P, Orozco L, Peloso GM,  
2 Poplin R, Rivas MA, Ruano-Rubio V, Rose SA, Ruderfer DM, Shakir K, Stenson PD,  
3 Stevens C, Thomas BP, Tiao G, Tusie-Luna MT, Weisburd B, Won H-H, Yu D,  
4 Altshuler DM, Ardissino D, Boehnke M, Danesh J, Donnelly S, Elosua R, Florez JC,  
5 Gabriel SB, Getz G, Glatt SJ, Hultman CM, Kathiresan S, Laakso M, McCarroll S,  
6 McCarthy MI, McGovern D, McPherson R, Neale BM, Palotie A, Purcell SM, Saleheen  
7 D, Scharf JM, Sklar P, Sullivan PF, Tuomilehto J, Tsuang MT, Watkins HC, Wilson JG,  
8 Daly MJ, MacArthur DG, Exome Aggregation Consortium. 2016. Analysis of protein-  
9 coding genetic variation in 60,706 humans. *Nature* **536**:285–291.  
10 doi:10.1038/nature19057
- 11 Levy JE, Jin O, Fujiwara Y, Kuo F, Andrews NC. 1999. Transferrin receptor is necessary for  
12 development of erythrocytes and the nervous system. *Nat Genet* **21**:396–399.  
13 doi:10.1038/7727
- 14 Lindsay EA, Vitelli F, Su H, Morishima M, Huynh T, Pramparo T, Jurecic V, Ogunrinu G,  
15 Sutherland HF, Scambler PJ, Bradley A, Baldini A. 2001. Tbx1 haploinsufficiency in  
16 the DiGeorge syndrome region causes aortic arch defects in mice. *Nature* **410**:97–101.  
17 doi:10.1038/35065105
- 18 Livak KJ, Schmittgen TD. 2001. Analysis of Relative Gene Expression Data Using Real-  
19 Time Quantitative PCR and the  $2^{-\Delta\Delta CT}$  Method. *Methods* **25**:402–408.  
20 doi:10.1006/meth.2001.1262
- 21 Lowery LA, Faris AER, Stout A, Van Vactor D. 2012. Neural Explant Cultures from  
22 *Xenopus laevis*. *J Vis Exp* e4232. doi:10.3791/4232
- 23 Luo S, Rubinsztein DC. 2009. Huntingtin promotes cell survival by preventing Pak2  
24 cleavage. *J Cell Sci* **122**:875–885. doi:10.1242/jcs.050013
- 25 Malhotra D, Sebat J. 2012. CNVs: harbingers of a rare variant revolution in psychiatric  
26 genetics. *Cell* **148**:1223–1241. doi:10.1016/j.cell.2012.02.039
- 27 Maquat LE. 2004. Nonsense-mediated mRNA decay: Splicing, translation and mRNP  
28 dynamics. *Nat Rev Mol Cell Biol* **5**:89–99. doi:10.1038/nrm1310
- 29 Marlin JW, Chang YWE, Ober M, Handy A, Xu W, Jakobi R. 2011. Functional PAK-2  
30 knockout and replacement with a caspase cleavage-deficient mutant in mice reveals  
31 differential requirements of full-length PAK-2 and caspase-activated PAK-2p34. *Mamm*  
32 *Genome* **22**:306–317. doi:10.1007/s00335-011-9326-6
- 33 Marshak S, Meynard MM, de Vries YA, Kidane AH, Cohen-Cory S. 2012. Cell-autonomous  
34 alterations in dendritic arbor morphology and connectivity induced by overexpression of  
35 MeCP2 in *Xenopus* central neurons in vivo. *PLoS One* **7**:e33153.  
36 doi:10.1371/journal.pone.0033153
- 37 Mendoza-Topaz C, Urrea F, Barría R, Albornoz V, Ugalde D, Thomas U, Gundelfinger ED,  
38 Delgado R, Kukuljan M, Sanxaridis PD, Tsunoda S, Ceriani MF, Budnik V, Sierralta J.  
39 2008. DLGS97/SAP97 is developmentally upregulated and is required for complex adult  
40 behaviors and synapse morphology and function. *J Neurosci* **28**:304–314.  
41 doi:10.1523/JNEUROSCI.4395-07.2008
- 42 Mi H, Huang X, Muruganujan A, Tang H, Mills C, Kang D, Thomas PD. 2017. PANTHER  
43 version 11: expanded annotation data from Gene Ontology and Reactome pathways, and  
44 data analysis tool enhancements. *Nucleic Acids Res* **45**:D183–D189.



- 1           doi:10.1093/nar/gkw1138
- 2   Miller JA, Ding S-L, Sunkin SM, Smith KA, Ng L, Szafer A, Ebbert A, Riley ZL, Royall JJ,  
3   Aiona K, Arnold JM, Bennet C, Bertagnolli D, Brouner K, Butler S, Caldejon S, Carey  
4   A, Cuhaciyani C, Dalley RA, Dee N, Dolbear TA, Facer BAC, Feng D, Fliss TP, Gee  
5   G, Goldy J, Gourley L, Gregor BW, Gu G, Howard RE, Jochim JM, Kuan CL, Lau C,  
6   Lee C-K, Lee F, Lemon TA, Lesnar P, McMurray B, Mastan N, Mosqueda N, Naluai-  
7   Cecchini T, Ngo N-K, Nyhus J, Oldre A, Olson E, Parente J, Parker PD, Parry SE,  
8   Stevens A, Pletikos M, Reding M, Roll K, Sandman D, Sarreal M, Shapouri S,  
9   Shapovalova N V., Shen EH, Sjoquist N, Slaughterbeck CR, Smith M, Sodt AJ,  
10   Williams D, Zöllei L, Fischl B, Gerstein MB, Geschwind DH, Glass IA, Hawrylycz MJ,  
11   Hevner RF, Huang H, Jones AR, Knowles JA, Levitt P, Phillips JW, Šestan N,  
12   Wohnoutka P, Dang C, Bernard A, Hohmann JG, Lein ES. 2014. Transcriptional  
13   landscape of the prenatal human brain. *Nature* **508**:199–206. doi:10.1038/nature13185
- 14   Morales J, Hiesinger PR, Schroeder AJ, Kume K, Verstreken P, Jackson FR, Nelson DL,  
15   Hassan BA. 2002. Drosophila fragile X protein DFXR regulates neuronal morphology  
16   and function in the brain. *Neuron* **34**:961–972. doi:10.1016/S0896-6273(02)00731-6
- 17   Mukai J, Tamura M, Fénelon K, Rosen AM, Spellman TJ, Kang R, MacDermott AB,  
18   Karayiorgou M, Gordon JA, Gogos JA. 2015. Molecular substrates of altered axonal  
19   growth and brain connectivity in a mouse model of schizophrenia. *Neuron* **86**:680–95.  
20   doi:10.1016/j.neuron.2015.04.003
- 21   Mulle JG. 2015. The 3q29 deletion confers >40-fold increase in risk for schizophrenia. *Mol*  
22   *Psychiatry* **20**:1028–1029. doi:10.1038/mp.2015.76
- 23   Mulle JG, Dodd AF, McGrath JA, Wolyniec PS, Mitchell AA, Shetty AC, Sobreira NL,  
24   Valle D, Rudd MK, Satten G, Cutler DJ, Pulver AE, Warren ST. 2010. Microdeletions  
25   of 3q29 confer high risk for schizophrenia. *Am J Hum Genet* **87**:229–236.  
26   doi:10.1016/j.ajhg.2010.07.013
- 27   Muller BM, Kistner U, Veh RW, Cases-Langhoff C, Becker B, Gundelfinger ED, Garner CC.  
28   1995. Molecular characterization and spatial distribution of SAP97, a novel presynaptic  
29   protein homologous to SAP90 and the Drosophila discs-large tumor suppressor protein.  
30   *J Neurosci* **15**:2354–2366.
- 31   Neufeld TP, Tang AH, Rubin GM. 1998. A genetic screen to identify components of the sina  
32   signaling pathway in Drosophila eye development. *Genetics* **148**:277–86.
- 33   Ng J, Luo L. 2004. Rho GTPases regulate axon growth through convergent and divergent  
34   signaling pathways. *Neuron* **44**:779–793. doi:10.1016/j.neuron.2004.11.014
- 35   Nicholas AK, Swanson EA, Cox JJ, Karbani G, Malik S, Springell K, Hampshire D, Ahmed  
36   M, Bond J, Di Benedetto D, Fichera M, Romano C, Dobyns WB, Woods CG. 2009. The  
37   molecular landscape of ASPM mutations in primary microcephaly. *J Med Genet*  
38   **46**:249–253. doi:10.1136/jmg.2008.062380
- 39   Nieuwkoop PD, Faber J. 1994. Normal table of *Xenopus laevis* (Daudin) : a systematical and  
40   chronological survey of the development from the fertilized egg till the end of  
41   metamorphosis. New York : Garland Pub.
- 42   O’Leary NA, Wright MW, Brister JR, Ciufu S, Haddad D, McVeigh R, Rajput B, Robbertse  
43   B, Smith-White B, Ako-Adjei D, Astashyn A, Badretdin A, Bao Y, Blinkova O, Brover  
44   V, Chetvernin V, Choi J, Cox E, Ermolaeva O, Farrell CM, Goldfarb T, Gupta T, Haft

- 1 D, Hatcher E, Hlavina W, Joardar VS, Kodali VK, Li W, Maglott D, Masterson P,  
2 McGarvey KM, Murphy MR, O'Neill K, Pujar S, Rangwala SH, Rausch D, Riddick LD,  
3 Schoch C, Shkeda A, Storz SS, Sun H, Thibaud-Nissen F, Tolstoy I, Tully RE, Vatsan  
4 AR, Wallin C, Webb D, Wu W, Landrum MJ, Kimchi A, Tatusova T, DiCuccio M,  
5 Kitts P, Murphy TD, Pruitt KD. 2016. Reference sequence (RefSeq) database at NCBI:  
6 Current status, taxonomic expansion, and functional annotation. *Nucleic Acids Res*  
7 **44**:D733–D745. doi:10.1093/nar/gkv1189
- 8 Oortveld MAW, Keerthikumar S, Oti M, Nijhof B, Fernandes AC, Kochinke K, Castells-  
9 Nobau A, van Engelen E, Ellenkamp T, Eshuis L, Galy A, van Bokhoven H, Habermann  
10 B, Brunner HG, Zweier C, Verstreken P, Huynen MA, Schenck A. 2013. Human  
11 Intellectual Disability Genes Form Conserved Functional Modules in Drosophila. *PLoS*  
12 *Genet* **9**:e1003911. doi:10.1371/journal.pgen.1003911
- 13 Pabis M, Neufeld N, Shav-Tal Y, Neugebauer KM. 2010. Binding properties and dynamic  
14 localization of an alternative isoform of the cap-binding complex subunit CBP20.  
15 *Nucleus* **1**:412–421. doi:10.4161/nucl.1.5.12839
- 16 Park E, Na M, Choi J, Kim S, Lee J-R, Yoon J, Park D, Sheng M, Kim E. 2003. The Shank  
17 Family of Postsynaptic Density Proteins Interacts with and Promotes Synaptic  
18 Accumulation of the  $\beta$ PIX Guanine Nucleotide Exchange Factor for Rac1 and Cdc42. *J*  
19 *Biol Chem* **278**:19220–19229. doi:10.1074/jbc.M301052200
- 20 Parnas D, Haghghi AP, Fetter RD, Kim SW, Goodman CS. 2001. Regulation of postsynaptic  
21 structure and protein localization by the Rho-type guanine nucleotide exchange factor  
22 dPix. *Neuron* **32**:415–424. doi:10.1016/S0896-6273(01)00485-8
- 23 Paterlini M, Zakharenko SS, Lai WS, Qin J, Zhang H, Mukai J, Westphal KGC, Olivier B,  
24 Sulzer D, Pavlidis P, Siegelbaum SA, Karayiorgou M, Gogos JA. 2005. Transcriptional  
25 and behavioral interaction between 22q11.2 orthologs modulates schizophrenia-related  
26 phenotypes in mice. *Nat Neurosci* **8**:1586–1594. doi:10.1038/nn1562
- 27 Petrovski S, Wang Q, Heinzen EL, Allen AS, Goldstein DB. 2013. Genic Intolerance to  
28 Functional Variation and the Interpretation of Personal Genomes. *PLoS Genet*  
29 **9**:e1003709. doi:10.1371/journal.pgen.1003709
- 30 Pinto D, Pagnamenta AT, Klei L, Anney R, Merico D, Regan R, Conroy J, Magalhaes TR,  
31 Correia C, Abrahams BS, Almeida J, Bacchelli E, Bader GD, Bailey AJ, Baird G,  
32 Battaglia A, Berney T, Bolshakova N, Bölte S, Bolton PF, Bourgeron T, Brennan S,  
33 Brian J, Bryson SE, Carson AR, Casallo G, Casey J, Chung BHY, Cochrane L, Corsello  
34 C, Crawford EL, Crossett A, Cytrynbaum C, Dawson G, de Jonge M, Delorme R, Drmic  
35 I, Duketis E, Duque F, Estes A, Farrar P, Fernandez BA, Folstein SE, Fombonne E,  
36 Freitag CM, Gilbert J, Gillberg C, Glessner JT, Goldberg J, Green A, Green J, Guter SJ,  
37 Hakonarson H, Heron EA, Hill M, Holt R, Howe JL, Hughes G, Hus V, Iglizzi R, Kim  
38 C, Klauck SM, Klevzon A, Korvatska O, Kustanovich V, Lajonchere CM, Lamb JA,  
39 Laskawiec M, Leboyer M, Le Couteur A, Leventhal BL, Lionel AC, Liu X-Q, Lord C,  
40 Lotspeich L, Lund SC, Maestrini E, Mahoney W, Mantoulan C, Marshall CR,  
41 McConachie H, McDougle CJ, McGrath J, McMahon WM, Merikangas A, Migita O,  
42 Minshew NJ, Mirza GK, Munson J, Nelson SF, Noakes C, Noor A, Nygren G, Oliveira  
43 G, Papanikolaou K, Parr JR, Parrini B, Paton T, Pickles A, Pilorge M, Piven J, Ponting  
44 CP, Posey DJ, Poustka A, Poustka F, Prasad A, Ragoussis J, Renshaw K, Rickaby J,  
45 Roberts W, Roeder K, Roge B, Rutter ML, Bierut LJ, Rice JP, Salt J, Sansom K, Sato D,  
46 Segurado R, Sequeira AF, Senman L, Shah N, Sheffield VC, Soorya L, Sousa I, Stein O,



- 1 Sykes N, Stoppioni V, Strawbridge C, Tancredi R, Tansey K, Thiruvahindrapduram B,  
2 Thompson AP, Thomson S, Tryfon A, Tsiantis J, Van Engeland H, Vincent JB,  
3 Volkmar F, Wallace S, Wang K, Wang Z, Wassink TH, Webber C, Weksberg R, Wing  
4 K, Wittemeyer K, Wood S, Wu J, Yaspan BL, Zurawiecki D, Zwaigenbaum L,  
5 Buxbaum JD, Cantor RM, Cook EH, Coon H, Cuccaro ML, Devlin B, Ennis S,  
6 Gallagher L, Geschwind DH, Gill M, Haines JL, Hallmayer J, Miller J, Monaco AP,  
7 Nurnberger Jr JI, Paterson AD, Pericak-Vance MA, Schellenberg GD, Szatmari P,  
8 Vicente AM, Vieland VJ, Wijsman EM, Scherer SW, Sutcliffe JS, Betancur C. 2010.  
9 Functional impact of global rare copy number variation in autism spectrum disorders.  
10 *Nature* **466**:368–372. doi:10.1038/nature09146
- 11 Pollak RM, Murphy MM, Epstein MP, Zwick ME, Klaiman C, Saulnier CA, Mulle JG. 2019.  
12 Neuropsychiatric phenotypes and a distinct constellation of ASD features in 3q29  
13 deletion syndrome: results from the 3q29 registry. *Mol Autism* **10**:30.  
14 doi:10.1186/s13229-019-0281-5
- 15 Poulton CJ, Schot R, Kia SK, Jones M, Verheijen FW, Venselaar H, De Wit MCY, De Graaff  
16 E, Bertoli-Avella AM, Mancini GMS. 2011. Microcephaly with simplified gyration,  
17 epilepsy, and infantile diabetes linked to inappropriate apoptosis of neural progenitors.  
18 *Am J Hum Genet* **89**:265–276. doi:10.1016/j.ajhg.2011.07.006
- 19 Pratt KG, Khakhalin AS. 2013. Modeling human neurodevelopmental disorders in the  
20 *Xenopus tadpole: from mechanisms to therapeutic targets. Dis Model Mech* **6**:1057–  
21 1065. doi:10.1242/dmm.012138
- 22 Purcell SM, Moran JL, Fromer M, Ruderfer D, Solovieff N, Roussos P, O’Dushlaine C,  
23 Chambert K, Bergen SE, Kähler A, Duncan L, Stahl E, Genovese G, Fernández E,  
24 Collins MO, Komiyama NH, Choudhary JS, Magnusson PKE, Banks E, Shakir K,  
25 Garimella K, Fennell T, DePristo M, Grant SGN, Haggarty SJ, Gabriel S, Scolnick EM,  
26 Lander ES, Hultman CM, Sullivan PF, McCarroll SA, Sklar P. 2014. A polygenic  
27 burden of rare disruptive mutations in schizophrenia. *Nature* **506**:185–190.  
28 doi:10.1038/nature12975
- 29 Quintero-Rivera F, Sharifi-Hannauer P, Martinez-Agosto JA. 2010. Autistic and psychiatric  
30 findings associated with the 3q29 microdeletion syndrome: Case report and review. *Am*  
31 *J Med Genet Part A* **152** A:2459–2467. doi:10.1002/ajmg.a.33573
- 32 Reiter LT, Potocki L, Chien S, Gribskov M, Bier E. 2001. A systematic analysis of human  
33 disease-associated gene sequences in *Drosophila melanogaster. Genome Res* **11**:1114–  
34 1125. doi:10.1101/gr.169101
- 35 Robinson MD, McCarthy DJ, Smyth GK. 2009. edgeR: A Bioconductor package for  
36 differential expression analysis of digital gene expression data. *Bioinformatics* **26**:139–  
37 140. doi:10.1093/bioinformatics/btp616
- 38 Rutkowski TP, Purcell RH, Pollak RM, Grewenow SM, Gafford GM, Malone T, Khan UA,  
39 Schroeder JP, Epstein MP, Bassell GJ, Warren ST, Weinshenker D, Caspary T, Mulle  
40 JG. 2019. Behavioral changes and growth deficits in a CRISPR engineered mouse model  
41 of the schizophrenia-associated 3q29 deletion. *Mol Psychiatry*. doi:10.1038/s41380-019-  
42 0413-5
- 43 Rutkowski TP, Schroeder JP, Gafford GM, Warren ST, Weinshenker D, Caspary T, Mulle  
44 JG. 2017. Unraveling the genetic architecture of copy number variants associated with  
45 schizophrenia and other neuropsychiatric disorders. *J Neurosci Res* **95**:1144–1160.

- 1           doi:10.1002/jnr.23970
- 2    Sabin LR, Zhou R, Gruber JJ, Lukinova N, Bambina S, Berman A, Lau CK, Thompson CB,  
3    Cherry S. 2009. Ars2 Regulates Both miRNA- and siRNA- Dependent Silencing and  
4    Suppresses RNA Virus Infection in Drosophila. *Cell* **138**:340–351.  
5    doi:10.1016/j.cell.2009.04.045
- 6    Saiga T, Fukuda T, Matsumoto M, Tada H, Okano HJ, Okano H, Nakayama KI. 2009.  
7    Fbxo45 Forms a Novel Ubiquitin Ligase Complex and Is Required for Neuronal  
8    Development. *Mol Cell Biol* **29**:3529–3543. doi:10.1128/mcb.00364-09
- 9    Schneider CA, Rasband WS, Eliceiri KW. 2012. NIH Image to ImageJ: 25 years of image  
10   analysis. *Nat Methods* **9**:671–5.
- 11   Shao L, Shuai Y, Wang J, Feng S, Lu B, Li Z, Zhao Y, Wang L, Zhong Y. 2011.  
12    Schizophrenia susceptibility gene dysbindin regulates glutamatergic and dopaminergic  
13    functions via distinctive mechanisms in Drosophila. *Proc Natl Acad Sci* **108**:18831–  
14    18836. doi:10.1073/pnas.1114569108
- 15   Sherwood NT, Sun Q, Xue M, Zhang B, Zinn K. 2004. Drosophila spastin regulates synaptic  
16    microtubule networks and is required for normal motor function. *PLoS Biol* **2**:e429.  
17    doi:10.1371/journal.pbio.0020429
- 18   Shin EY, Shin KS, Lee CS, Woo KN, Quan SH, Soung NK, Kim YG, Cha CI, Kim SR, Park  
19    D, Bokoch GM, Kim EG. 2002. Phosphorylation of p85 βPIX, a Rac/Cdc42-specific  
20    guanine nucleotide exchange factor, via the Ras/ERK/PAK2 pathway is required for  
21    basic fibroblast growth factor-induced neurite outgrowth. *J Biol Chem* **277**:44417–  
22    44430. doi:10.1074/jbc.M203754200
- 23   Silver DL, Watkins-Chow DE, Schreck KC, Pierfelice TJ, Larson DM, Burnett AJ, Liaw H-  
24    J, Myung K, Walsh CA, Gaiano N, Pavan WJ. 2010. The exon junction complex  
25    component Magoh controls brain size by regulating neural stem cell division. *Nat*  
26    *Neurosci* **13**:551–558. doi:10.1038/nn.2527
- 27   Sive HL, Grainger RM, Harland RM. 2010. Microinjection of Xenopus Oocytes. *Cold Spring*  
28    *Harb Protoc* **2010**:pdb.prot5536. doi:10.1101/pdb.prot5536
- 29   Steller H. 2008. Regulation of apoptosis in Drosophila. *Cell Death Differ* **15**:1132–1138.  
30    doi:10.1038/cdd.2008.50
- 31   Thaker HM, Kankel DR. 1992. Mosaic analysis gives an estimate of the extent of genomic  
32    involvement in the development of the visual system in Drosophila melanogaster.  
33    *Genetics* **131**:883–94.
- 34   The Gene Ontology Consortium. 2019. The Gene Ontology Resource: 20 years and still  
35    GOing strong. *Nucleic Acids Res* **47**:D330–D338. doi:10.1093/nar/gky1055
- 36   Thomas BJ, Wassarman DA. 1999. A fly’s eye view of biology. *Trends Genet* **15**:184–90.
- 37   Thomas U, Kim E, Kuhlendahl S, Koh YH, Gundelfinger ED, Sheng M, Garner CC, Budnik  
38    V. 1997. Synaptic clustering of the cell adhesion molecule Fasciclin II by discs- large  
39    and its role in the regulation of presynaptic structure. *Neuron* **19**:787–799.  
40    doi:10.1016/S0896-6273(00)80961-7
- 41   Thormann A, Halachev M, McLaren W, Moore DJ, Svinti V, Campbell A, Kerr SM,  
42    Tischkowitz M, Hunt SE, Dunlop MG, Hurles ME, Wright CF, Firth H V., Cunningham

- 1 F, FitzPatrick DR. 2019. Flexible and scalable diagnostic filtering of genomic variants  
2 using G2P with Ensembl VEP. *Nat Commun* **10**:2373. doi:10.1038/s41467-019-10016-3
- 3 Thurmond J, Goodman JL, Strelets VB, Attrill H, Gramates LS, Marygold SJ, Matthews BB,  
4 Millburn G, Antonazzo G, Trovisco V, Kaufman TC, Calvi BR, Perrimon N, Gelbart  
5 SR, Agapite J, Broll K, Crosby L, Dos Santos G, Emmert D, Falls K, Jenkins V,  
6 Sutherland C, Tabone C, Zhou P, Zytkevich M, Brown N, Garapati P, Holmes A, Larkin  
7 A, Pilgrim C, Urbano P, Czoch B, Cripps R, Baker P. 2019. FlyBase 2.0: The next  
8 generation. *Nucleic Acids Res* **47**:D759–D765. doi:10.1093/nar/gky1003
- 9 Tittel JN, Steller H. 2000. A comparison of programmed cell death between species. *Genome*  
10 *Biol* **1**:REVIEWS0003. doi:10.1186/gb-2000-1-3-reviews0003
- 11 Turner TN, Yi Q, Krumm N, Huddleston J, Hoekzema K, Stessman HAF, Doebley AL,  
12 Bernier RA, Nickerson DA, Eichler EE. 2017. NAR Breakthrough Article denovo-db: A  
13 compendium of human de novo variants. *Nucleic Acids Res* **45**:D804–D811.  
14 doi:10.1093/nar/gkw865
- 15 UniProt Consortium. 2018. UniProt: the universal protein knowledgebase. *Nucleic Acids Res*  
16 **46**:2699–2699. doi:10.1093/nar/gky092
- 17 Walch L. 2013. Emerging role of the scaffolding protein Dlg1 in vesicle trafficking. *Traffic*  
18 **14**:964–973. doi:10.1111/tra.12089
- 19 Wang L, Magdaleno S, Tabas I, Jackowski S. 2005. Early Embryonic Lethality in Mice with  
20 Targeted Deletion of the CTP:Phosphocholine Cytidylyltransferase Gene (*Pcyl1a*). *Mol*  
21 *Cell Biol* **25**:3357–3363. doi:10.1128/mcb.25.8.3357-3363.2005
- 22 Wang Y, Zeng C, Li J, Zhou Z, Ju X, Xia S, Li Y, Liu A, Teng H, Zhang K, Shi L, Bi C, Xie  
23 W, He X, Jia Z, Jiang Y, Cai T, Wu J, Xia K, Sun ZS. 2018. PAK2 Haploinsufficiency  
24 Results in Synaptic Cytoskeleton Impairment and Autism-Related Behavior. *Cell Rep*  
25 **24**:2029–2041. doi:10.1016/j.celrep.2018.07.061
- 26 Wangler MF, Yamamoto S, Bellen HJ. 2015. Fruit flies in biomedical research. *Genetics*  
27 **199**:639–653. doi:10.1534/genetics.114.171785
- 28 Warde-Farley D, Donaldson SL, Comes O, Zuberi K, Badrawi R, Chao P, Franz M, Grouios  
29 C, Kazi F, Lopes CT, Maitland A, Mostafavi S, Montojo J, Shao Q, Wright G, Bader  
30 GD, Morris Q. 2010. The GeneMANIA prediction server: Biological network  
31 integration for gene prioritization and predicting gene function. *Nucleic Acids Res*  
32 **38**:W214–220. doi:10.1093/nar/gkq537
- 33 Wu Y, Bolduc F V., Bell K, Tully T, Fang Y, Sehgal A, Fischer JA. 2008. A *Drosophila*  
34 model for Angelman syndrome. *Proc Natl Acad Sci* **105**:12399–12404.  
35 doi:10.1073/pnas.0805291105
- 36 Xu D, Woodfield SE, Lee T V, Fan Y, Antonio C, Bergmann A. 2009. Genetic control of  
37 programmed cell death (apoptosis) in *Drosophila*. *Fly (Austin)* **3**:78–90.  
38 doi:10.4161/fly.3.1.7800
- 39 Yamaguchi Y, Miura M. 2015. Programmed Cell Death in Neurodevelopment. *Dev Cell*  
40 **32**:478–490. doi:10.1016/j.devcel.2015.01.019
- 41 Ye J, Coulouris G, Zaretskaya I, Cutcutache I, Rozen S, Madden TL. 2012. Primer-BLAST:  
42 A tool to design target-specific primers for polymerase chain reaction. *BMC*  
43 *Bioinformatics* **13**:134. doi:10.1186/1471-2105-13-134

## 1 MAIN AND SUPPLEMENTAL FIGURE LEGENDS

2

3 **Figure 1.** Strategy for identifying cellular phenotypes and genetic interactions of homologs  
4 of 3q29 genes. We first knocked down individual or pairs of 14 *Drosophila* homologs of  
5 human genes in the 3q29 region using tissue-specific RNAi. After screening for global  
6 phenotypes of RNAi lines for individual homologs of 3q29 genes, we tested 314 pairwise  
7 interactions using the fly eye system, and found that *Cbp20* (*NCBP2*) enhanced the  
8 phenotypes of other homologs of 3q29 genes and also interacted with homologs of known  
9 neurodevelopmental genes outside of the 3q29 region. Next, we assayed for deeper cellular  
10 and neuronal phenotypes of flies with individual and pairwise knockdown of homologs of  
11 3q29 genes, and observed cellular defects that identified apoptosis and cell cycle as  
12 underlying mechanisms associated with the deletion. We confirmed our results by rescuing  
13 cellular phenotypes with overexpression of the apoptosis inhibitor *Diap1* as well as by  
14 analyzing genes differentially expressed with knockdown of fly homologs of 3q29 genes.  
15 Finally, we tested a subset of three homologs of 3q29 genes in the *X. laevis* vertebrate model  
16 system by injecting two- or four-cell stage embryos with GFP and morpholinos (MOs) for *X.*  
17 *laevis* homologs of 3q29 genes to observe abnormal eye morphology, as well as injecting one  
18 cell with GFP and MOs at the two-cell stage to observe abnormal brain morphology. We  
19 found similar developmental defects to those observed in *Drosophila*, including increased  
20 apoptosis that was enhanced with pairwise knockdown of *X. laevis* homologs of 3q29 genes  
21 and rescued with overexpression of the apoptosis inhibitor *xiap*. *X. laevis* embryo diagrams  
22 were produced by Nieuwkoop and Faber (Nieuwkoop and Faber, 1994) and provided by  
23 Xenbase (Karimi et al., 2018).

24

25 **Figure 1—Figure Supplement 1.** *Drosophila* homologs of human 3q29 genes and  
26 expression of *Drosophila* homologs during development. DIOPT version 7.1 (Hu et al., 2011)  
27 and reciprocal BLAST were used to identify fly homologs of genes within the 3q29 region;  
28 six genes did not have fly homologs. Expression levels of fly homologs of 3q29 genes were  
29 assessed using high-throughput expression data from FlyAtlas Anatomy microarray  
30 expression data (Chintapalli et al., 2007) and modENCODE Anatomy RNA-Seq data  
31 (Graveley et al., 2011) from FlyBase.

32

1 **Figure 1—Figure Supplement 2.** qPCR primers and expression values for RNAi  
2 knockdown of fly homologs of 3q29 genes. *Elav-GAL4* flies were crossed with RNAi lines of  
3 fly homologs of 3q29 genes at 25°C, and 3-4 day old adult *Drosophila* heads were used to  
4 quantify the level of expression compared with *Elav-GAL4* controls. *Elav-GAL4;;Dicer2* flies  
5 crossed with *CG5359* flies showed overexpression of *tiptop* (Green et al., 2014) and were  
6 therefore excluded from further experiments. A list of full genotypes for fly crosses used in  
7 these experiments is provided in **Supplementary File 2**, and statistics for these data are  
8 provided in **Supplementary File 5**.

9  
10 **Figure 1—Figure Supplement 3.** Comparison of animal model phenotypes with knockdown  
11 or knockout of homologs of 3q29 genes. Blue shaded boxes indicate previously identified  
12 phenotypes for individual homologs of 3q29 genes, while “X” marks indicate recapitulated  
13 and novel phenotypes identified in our study. Gray-shaded boxes indicate that a homolog was  
14 not present in the model organism. Fly phenotypes were obtained from FlyBase (Thurmond  
15 et al., 2019), *X. laevis* phenotypes were obtained from Xenbase (Karimi et al., 2018), and  
16 mouse knockout model phenotypes were obtained from the Mouse Genome Informatics  
17 database (Bult et al., 2019).

18  
19  
20 **Figure 2.** Neurodevelopmental defects in flies with knockdown of individual homologs of  
21 3q29 genes. (A) Percentage of flies with tissue-specific RNAi knockdown of homologs of  
22 3q29 genes (listed with their human counterparts) that manifest lethality or developmental  
23 phenotypes. (B) Eight homologs of 3q29 genes with pan-neuronal RNAi knockdown showed  
24 defects in climbing ability over ten days (two-way repeated measures ANOVA,  $p < 1 \times 10^{-4}$ ,  
25  $df = 8$ ,  $F = 21.097$ ). Data represented show mean  $\pm$  standard deviation of 10 independent  
26 groups of 10 flies for each homolog. (C) Representative brightfield adult eye images of flies  
27 with eye-specific *GMR-GAL4;UAS-Dicer2* (scale bar = 100  $\mu$ m) RNAi knockdown of  
28 individual homologs of 3q29 genes show rough eye phenotypes. The boxplot shows  
29 *Flynotyper*-derived phenotypic scores for eyes with knockdown of homologs of 3q29 genes  
30 ( $n = 10-14$ ,  $*p < 0.05$ , one-tailed Mann–Whitney test with Benjamini-Hochberg correction).  
31 (D) Boxplot of adult eye area in flies with *GMR-GAL4* RNAi knockdown of fly homologs of  
32 3q29 genes ( $n = 13-16$ ,  $*p < 0.05$ , two-tailed Mann–Whitney test with Benjamini-Hochberg  
33 correction). (E) Confocal images of pupal eyes (scale bar = 5  $\mu$ m) stained with anti-DLG



1 (top) and larval eye discs (scale bar = 30  $\mu$ m) stained with anti-pH3 (middle) and anti-dcp1  
2 (bottom) illustrate cellular defects posterior to the morphogenetic furrow (white box) upon  
3 knockdown of select fly homologs of 3q29 genes. Yellow circles in DLG images indicate  
4 cone cell defects, white circles indicate bristle cell defects, yellow arrows indicate rotation  
5 defects, and yellow arrowheads indicate secondary cell defects. To account for reduced DLG  
6 expression in pupal eyes with knockdown of *dlg1*, images were taken at a higher intensity  
7 than control images (see Methods). (F) Boxplot of pH3-positive cells in larval eye discs of  
8 flies with knockdown of homologs of 3q29 genes (n = 9–12, \*p < 0.05, two-tailed Mann–  
9 Whitney test with Benjamini-Hochberg correction). (G) Boxplot of dcp1-positive cells in  
10 larval eye discs of flies with knockdown of homologs of 3q29 genes (n = 11–12, \*p < 0.05,  
11 two-tailed Mann–Whitney test with Benjamini-Hochberg correction). All boxplots indicate  
12 median (center line), 25th and 75th percentiles (bounds of box), and minimum and maximum  
13 (whiskers), with red dotted lines representing the control median. Results for a subset of  
14 climbing ability, adult eye area, and pH3 staining experiments were replicated in independent  
15 experimental batches (Figure 2—Figure Supplement 9). A list of full genotypes for fly  
16 crosses used in these experiments is provided in Supplementary File 2.

17

18 **Figure 2—Figure Supplement 1.** Developmental defects in flies with tissue-specific  
19 knockdown of individual homologs of 3q29 genes. (A) Images of adult fly wings (scale bar =  
20 500 $\mu$ m) show a range of phenotypic defects due to wing-specific *beadex*<sup>MS1096</sup>-*GAL4* RNAi  
21 knockdown of fly homologs of 3q29 genes. (B) Adult flies with pan-neuronal RNAi  
22 knockdown of *dlg1* showed approximately 30% lethality between days 1-4 (one-way  
23 repeated measures ANOVA, p < 1 $\times$ 10<sup>-4</sup>, df = 1, F = 54.230), which was not observed in control  
24 *Elav-GAL4* or *Cbp20* knockdown flies. Data represented shows mean  $\pm$  standard deviation of  
25 10 independent groups of 10 flies for each homolog. (C) Representative confocal images of  
26 larval eye discs stained with anti-chaoptin (scale bar = 30  $\mu$ m) illustrate defects in axonal  
27 targeting (highlighted by white arrows) from the retina to the optic lobes of the brain upon  
28 eye-specific knockdown of fly homologs of 3q29 genes. Note that n=8-20 larval eye disc  
29 preparations were assessed for each RNAi line tested. A list of full genotypes for fly crosses  
30 used in these experiments is provided in Supplementary File 2.

31

32 **Figure 2—Figure Supplement 2.** Summary of scoring for phenotypic severity of axon  
33 guidance defects upon individual and pairwise knockdown of homologs of 3q29 genes.  
34 Individual larval eye disc images were assigned mild, moderate or severe scores based on the



1 severity of axon projection loss observed in each eye disc. We found that the mild to  
2 moderate defects observed with knockdown of *Cbp20* were enhanced with concomitant  
3 knockdown of *dlg1* or *Fsn*, while *Diap1* overexpression partially rescued the defects  
4 observed with knockdown of *Cbp20* or *dlg1*. A list of full genotypes for fly crosses used in  
5 these experiments is provided in **Supplementary File 2**.

6  
7 **Figure 2—Figure Supplement 3.** Examination of cellular phenotypes in the *Drosophila* eye.

8 We tested individual and pairwise knockdown of fly homologs of 3q29 genes for cellular  
9 phenotypes in the adult, pupal and larval eyes. (A) We first used the *Flynotyper* software  
10 (Iyer et al., 2016) to quantify the degree of ommatidial disorganization leading to rough eye  
11 phenotypes in adult flies, as represented by the distance and angles between adjacent  
12 ommatidia (yellow arrows). (B) We next stained pupal eyes with anti-DLG to observe  
13 changes in the number and arrangement of ommatidial cells, including cone cells (c), bristle  
14 cells (b), and primary, secondary and tertiary cells (1,2,3). We also examined the  
15 organization of the photoreceptor cells (R1-R7, with R8 not visible) in each ommatidium by  
16 staining the pupal eyes with Phalloidin. (C) We finally stained larval eye discs with markers  
17 for cellular processes, such as pH3 for proliferating cells and dcp1 for apoptosis. As the  
18 progression of the morphogenetic furrow (MF) across the larval eye discs leads to  
19 proliferation and differentiation of photoreceptor neurons (Greenwood and Struhl, 1999), we  
20 examined changes in the number of stained cells posterior or adjacent to the MF. (D) Scatter  
21 plot of dcp1, pH3, TUNEL, and BrdU-positive cell counts in larval eye discs with  
22 knockdown of homologs of 3q29 genes quantified using two ImageJ plugins,  
23 AnalyzeParticles and Image-based Tool for Counting Nuclei (ITCN). As the two methods  
24 showed a strong correlation with each other (Pearson correlation,  $n=285$ ,  $r=0.736$ ,  $p<2.2\times 10^{-16}$ ),  
25 we used ITCN counts to display cell count data in the manuscript.

26  
27 **Figure 2—Figure Supplement 4.** Phenotypic screening for flies with eye-specific  
28 knockdown of individual fly homologs of 3q29 genes. (A) Representative brightfield adult  
29 eye images of flies with *GMR-GAL4;UAS-Dicer2* RNAi knockdown of fly homologs of 3q29  
30 genes (scale bar = 100  $\mu$ m) show a wide range of phenotypic severity. (B) Box plot of  
31 average ommatidial diameter in flies with *GMR-GAL4* knockdown of select fly homologs of  
32 3q29 genes ( $n = 15$ ,  $*p < 0.05$ , two-tailed Mann–Whitney test with Benjamini-Hochberg  
33 correction). (C) Box plot of phenotypic scores derived from *Flynotyper* for eye-specific  
34 *GMR-GAL4* RNAi knockdown of 13 fly homologs of 3q29 genes ( $n = 5-20$ ,  $*p < 0.05$ , one-

1   tailed Mann–Whitney test with Benjamini-Hochberg correction). **(D)** Box plot of phenotypic  
2   scores derived from *Flyntyper* for eye-specific *GMR-GAL4;UAS-Dicer2* (left) and *GMR-*  
3   *GAL4* (right) RNAi knockdown of nine validation lines for fly homologs of 3q29 genes  
4   ( $n = 5–14$ ,  $*p < 0.05$ , one-tailed Mann–Whitney test with Benjamini-Hochberg correction).  
5   All boxplots indicate median (center line), 25th and 75th percentiles (bounds of box), and  
6   minimum and maximum (whiskers), with red dotted lines representing the control median. A  
7   list of full genotypes for fly crosses used in these experiments is provided in **Supplementary**  
8   **File 2**.

9  
10 **Figure 2—Figure Supplement 5.** Table comparing *Flyntyper* scores for flies with *GMR-*  
11 *GAL4;UAS-Dicer2* RNAi knockdown of homologs of 3q29 genes (shaded in grey) with  
12 previously published scores for flies with *GAL4;UAS-Dicer2* RNAi knockdown of homologs  
13 of candidate neurodevelopmental genes (Iyer et al., 2016).

14  
15 **Figure 2—Figure Supplement 6.** Cellular phenotypes of flies with eye-specific knockdown  
16 of individual fly homologs of 3q29 genes. **(A)** Confocal images of pupal eyes (scale  
17 bar = 5  $\mu\text{m}$ ) stained with anti-DLG illustrate a range of defects in ommatidial organization  
18 upon *GMR-GAL4* RNAi knockdown of fly homologs of 3q29 genes. Yellow circles indicate  
19 cone cell defects, white circles indicate bristle cell defects, yellow arrows indicate rotation  
20 defects, and yellow arrowheads indicate secondary cell defects. **(B)** Confocal images of pupal  
21 eyes (scale bar = 5  $\mu\text{m}$ ) stained with Phalloidin illustrate defects in photoreceptor cell count  
22 and organization upon knockdown of fly homologs of 3q29 genes. **(C)** Confocal images of  
23 larval eye discs (scale bar = 30  $\mu\text{m}$ ) stained with anti-pH3 illustrate changes in cell  
24 proliferation upon knockdown of select fly homologs of 3q29 genes. **(D)** Larval eye discs  
25 (scale bar = 30  $\mu\text{m}$ ) stained with BrdU (top) and TUNEL (bottom) illustrate abnormal cell  
26 cycle and apoptosis defects, respectively, due to eye-specific knockdown of *Cbp20* and *dlg1*.  
27 **(E)** Box plot of BrdU-positive cells in the larval eye discs of flies with knockdown of *dlg1*  
28 and *Cbp20* ( $n = 7–12$ ,  $*p < 0.05$ , two-tailed Mann–Whitney test with Benjamini-Hochberg  
29 correction). **(F)** Box plot of TUNEL-positive cells in the larval eye discs of flies with  
30 knockdown of *dlg1* and *Cbp20* ( $n = 8$ ,  $*p < 0.05$ , two-tailed Mann–Whitney test with  
31 Benjamini-Hochberg correction). Results for the TUNEL staining experiments were  
32 replicated in an independent experimental batch (**Figure 2—Figure Supplement 9**). All  
33 boxplots indicate median (center line), 25th and 75th percentiles (bounds of box), and  
34 minimum and maximum (whiskers), with red dotted lines representing the control median. A

1 list of full genotypes for fly crosses used in these experiments is provided in **Supplementary**  
2 **File 2**.

3

4 **Figure 2—Figure Supplement 7.** Analysis of defects in ommatidial cells with *GMR-GAL4*  
5 RNAi knockdown of fly homologs of 3q29 genes. The number of “+” symbols displayed in  
6 the table indicate the severity of the observed cellular defects. Note that n=4-16 pupal eye  
7 preparations were assessed for each RNAi line tested. A list of full genotypes for fly crosses  
8 used in these experiments is provided in **Supplementary File 2**.

9

10 **Figure 2—Figure Supplement 8.** Cellular phenotypes of flies with wing-specific  
11 knockdown of individual fly homologs of 3q29 genes. (A) Larval wing discs (scale  
12 bar = 50  $\mu$ m) stained with pH3 illustrate abnormal cell proliferation due to RNAi knockdown  
13 of select fly homologs of 3q29 genes, compared with appropriate VDRC GD and KK  
14 *beadex<sup>MS1096</sup>-GAL4* controls. We examined changes in the number of stained cells within the  
15 wing pouch of the wing disc (white box), which becomes the adult wing. (B) Box plot of  
16 pH3-positive cells in the larval wing discs of flies with knockdown of select fly homologs of  
17 3q29 genes (n = 8–15, \*p < 0.05, two-tailed Mann–Whitney test with Benjamini-Hochberg  
18 correction). (C) Larval wing discs (scale bar = 50  $\mu$ m) stained with anti-dcp1 show abnormal  
19 apoptosis due to knockdown of select fly homologs of 3q29 genes compared with appropriate  
20 VDRC GD and KK *beadex<sup>MS1096</sup>-GAL4* controls. (D) Box plot of dcp1-positive cells in the  
21 larval wing discs of flies with knockdown of select fly homologs of 3q29 genes (n = 8–15,  
22 \*p < 0.05, two-tailed Mann–Whitney test with Benjamini-Hochberg correction). *Cbp20* flies  
23 showed severe dcp1 staining across the entire wing disc and could not be quantified. All  
24 boxplots indicate median (center line), 25th and 75th percentiles (bounds of box), and  
25 minimum and maximum (whiskers), with red dotted lines representing the control median. A  
26 list of full genotypes for fly crosses used in these experiments is provided in **Supplementary**  
27 **File 2**.

28

29 **Figure 2—Figure Supplement 9.** Replication of *Drosophila* experimental results for  
30 individual and pairwise knockdown of homologs of 3q29 genes. (A) Replication dataset for  
31 climbing ability of select homologs of 3q29 genes over ten days. We replicated the defects in  
32 climbing ability observed with pan-neuronal RNAi knockdown of *Cbp20* and *dlg1*, while  
33 climbing defects in flies with knockdown of *Fsn* flies were not replicated in the second  
34 experimental batch and were therefore excluded from the main dataset (**Figure 2B**). Data

1 represented show mean  $\pm$  standard deviation of 7-10 independent groups of 10 flies for each  
2 homolog. **(B)** Replication dataset for climbing ability of pairwise knockdown of homologs of  
3 3q29 genes over ten days. We replicated the defects in climbing ability observed with pan-  
4 neuronal RNAi knockdown of *Cbp20/dlg1* and *Cbp20/Fsn* compared with recombined *Cbp20*  
5 knockdown (**Figure 3F**). Data represented show mean  $\pm$  standard deviation of 5 independent  
6 groups of 10 flies for each homolog. **(C)** Replication dataset for adult eye area in flies with  
7 *GMR-GAL4* RNAi knockdown of homologs of 3q29 genes ( $n = 10-14$ ,  $*p < 0.05$ , two-tailed  
8 Mann–Whitney test with Benjamini-Hochberg correction). We replicated the decreased eye  
9 sizes in flies with knockdown of *Cbp20* and *CG8888*, while flies with knockdown of *dlg1*  
10 showed a non-significant ( $p=0.154$ ) increase in eye size (**Figure 2D**). **(D)** Confocal images  
11 for replication dataset larval eye discs (scale bar = 30  $\mu\text{m}$ ) stained with anti-pH3 (top) and  
12 TUNEL (bottom) illustrate cellular defects posterior to the morphogenetic furrow (white box)  
13 upon knockdown of select fly homologs of 3q29 genes (**Figure 2E**). **(E)** Replication dataset  
14 for pH3-positive cells in larval eye discs of flies with knockdown of homologs of 3q29 genes  
15 ( $n = 9-10$ , two-tailed Mann–Whitney test with Benjamini-Hochberg correction). As in the  
16 main dataset (**Figure 2F**), we observed no significant changes in cell proliferation for flies  
17 with knockdown of *Cbp20* and *dlg1*. **(F)** Replication dataset for TUNEL-positive cells in  
18 larval eye discs of flies with knockdown of homologs of 3q29 genes ( $n = 6-8$ ,  $*p < 0.05$ , two-  
19 tailed Mann–Whitney test with Benjamini-Hochberg correction). We replicated the increased  
20 apoptosis phenotypes observed with knockdown of *Cbp20* and *dlg1* (**Figure 2—Figure**  
21 **Supplement 6F**). All boxplots indicate median (center line), 25th and 75th percentiles  
22 (bounds of box), and minimum and maximum (whiskers), with red dotted lines representing  
23 the control median. A list of full genotypes for fly crosses used in these experiments is  
24 provided in **Supplementary File 2**.

25  
26  
27 **Figure 3.** Screening for pairwise interactions of fly homologs of 3q29 genes in the  
28 *Drosophila* eye and nervous system. **(A)** Heatmap showing average changes in phenotypic  
29 scores for pairwise *GMR-GAL4* RNAi knockdown of fly homologs of 3q29 genes in the adult  
30 eye, compared with recombined lines for individual homologs of 3q29 genes. Gray boxes  
31 indicate crosses without available data. Boxplots of phenotypic scores for pairwise  
32 knockdown of **(B)** *Cbp20* and **(C)** *dlg1* with other fly homologs of 3q29 genes are shown  
33 ( $n = 5-14$ ,  $*p < 0.05$ , two-tailed Mann–Whitney test with Benjamini-Hochberg correction).  
34 Green arrows indicate an example pair of reciprocal lines showing enhanced phenotypes

1 compared with their respective single-hit recombined controls. Crosses with the mutant line  
2 *Tsf2*<sup>KG01571</sup> are included along with RNAi lines for other homologs of 3q29 genes, as eye-  
3 specific RNAi knockdown of *Tsf2* was lethal. (D) Representative brightfield adult eye images  
4 of flies with pairwise knockdown of fly homologs of 3q29 genes (scale bar = 100 μm) show  
5 enhancement (Enh.) of rough eye phenotypes compared with recombined lines for individual  
6 homologs of 3q29 genes. (E) Representative confocal images of larval eye discs stained with  
7 anti-chaoptin (scale bar = 30 μm) illustrate enhanced defects (Enh.) in axonal targeting (white  
8 arrows) from the retina to the optic lobes of the brain with eye-specific knockdown of  
9 *Cbp20/dlg1* and *Cbp20/Fsn* compared with *Cbp20* knockdown. Note that n=9-17 larval eye  
10 disc preparations were assessed for each tested interaction. (F) Flies with pan-neuronal *Elav-*  
11 *GAL4* pairwise knockdown of homologs of 3q29 genes showed enhanced defects in climbing  
12 ability over ten days (two-way repeated measures ANOVA,  $p < 4.00 \times 10^{-4}$ ,  $df = 2$ ,  $F = 7.966$ )  
13 compared with recombined *Cbp20* knockdown. Data represented show mean ± standard  
14 deviation of 10 independent groups of 10 flies for each line tested. Results for the climbing  
15 assays were replicated in an independent experimental batch (Figure 2—Figure Supplement  
16 9). All boxplots indicate median (center line), 25th and 75th percentiles (bounds of box), and  
17 minimum and maximum (whiskers), with red dotted lines representing the control median. A  
18 list of full genotypes for fly crosses used in these experiments is provided in Supplementary  
19 File 2.

20

21 **Figure 3—Figure Supplement 1.** Screening for pairwise interactions among fly homologs of  
22 3q29 genes. “All interactions” indicates the number of pairwise crosses where at least one  
23 second-hit RNAi or mutant line showed enhancement of the single-hit phenotype, while  
24 “Validated” indicates the number of interactions which have two or more crosses with a  
25 second-hit RNAi or mutant line (if available) showing the same result. “Reciprocal cross”  
26 indicates the number of interactions with concordant results across pairs of reciprocal cross  
27 (i.e. *Cbp20/dlg1* vs. *dlg1/Cbp20*). These totals include crosses with the mutant line  
28 *Tsf2*<sup>KG01571</sup>, as eye-specific RNAi knockdown of *Tsf2* was lethal, as well as flies heterozygous  
29 for *dlg1* RNAi and homozygous for *Cbp20* RNAi. Crosses with other RNAi or mutant lines  
30 for the same gene (shaded in grey) are included as validation lines tested but were not  
31 counted as interactions. A list of full genotypes for fly crosses used in these experiments is  
32 provided in Supplementary File 2.

33

1 **Figure 3—Figure Supplement 2.** Phenotypic screening for pairwise interactions of  
2 homologs of 3q29 genes in the adult fly eye. (A) Heatmap showing average changes in  
3 phenotypic scores for pairwise *GMR-GAL4* RNAi knockdown of fly homologs of 3q29 genes  
4 in the adult eye, compared with recombined lines for individual homologs of 3q29 genes.  
5 Gray boxes indicate crosses without available data. Crosses with the mutant line *Tsf2*<sup>KG01571</sup>  
6 are also included along with RNAi lines for other homologs of 3q29 genes, as eye-specific  
7 RNAi knockdown of *Tsf2* was lethal. (B-H) Box plots of phenotypic scores for pairwise  
8 knockdowns of homologs of 3q29 genes compared with recombined lines for individual  
9 homologs of 3q29 genes (n = 5–12, \*p < 0.05, two-tailed Mann–Whitney test with Benjamini-  
10 Hochberg correction). All boxplots indicate median (center line), 25th and 75th percentiles  
11 (bounds of box), and minimum and maximum (whiskers), with red dotted lines representing  
12 the control median. A list of full genotypes for fly crosses used in these experiments is  
13 provided in **Supplementary File 2**.

14

15 **Figure 3—Figure Supplement 3.** Validation lines for pairwise interactions of homologs of  
16 3q29 genes in the adult fly eye. (A-F) Box plots of phenotypic scores for pairwise *GMR-*  
17 *GAL4* RNAi knockdown of select fly homologs of 3q29 genes (*Cbp20*, *CG8888*, *dlg1*, *Fsn*,  
18 *Pak*, and *PIG-Z*) with validation RNAi and mutant lines for other homologs of 3q29 genes,  
19 compared with recombined lines for individual homologs of 3q29 genes (n = 4–14, \*p < 0.05,  
20 two-tailed Mann–Whitney test with Benjamini-Hochberg correction), are shown. These  
21 crosses include flies homozygous for *Cbp20* RNAi as well as flies homozygous for *Cbp20*  
22 RNAi and heterozygous for *dlg1* RNAi (green arrows). Note that the phenotypic scores  
23 derived from *Flynotyper* may not accurately capture the necrotic patches observed in these  
24 crosses. All boxplots indicate median (center line), 25th and 75th percentiles (bounds of box),  
25 and minimum and maximum (whiskers), with red dotted lines representing the control  
26 median. A list of full genotypes for fly crosses used in these experiments is provided in  
27 **Supplementary File 2**.

28

29 **Figure 3—Figure Supplement 4.** Transcriptome analysis of flies with knockdown of select  
30 homologs of 3q29 genes. (A) Clusters of Gene Ontology terms enriched among  
31 differentially-expressed fly genes (blue) and their corresponding human homologs (red) with  
32 individual and pairwise *Elav-GAL4* RNAi knockdown of fly homologs of 3q29 genes (p <  
33 0.05, Fisher's Exact test with Benjamini-Hochberg correction) are shown. Black boxes  
34 indicate enrichment of each gene set for clusters of Gene Ontology terms. Full lists of



1 enriched GO terms are provided in **Supplementary File 3. (B)** Enrichments for shared and  
2 unique differentially-expressed fly genes (blue) and their corresponding human homologs  
3 (red) with individual knockdown of *Cbp20* and *Fsn*, as well as concomitant knockdown of  
4 *Cbp20/Fsn*, are shown. We found 229 genes uniquely dysregulated in flies with pairwise  
5 knockdown of *Fsn* and *Cbp20*, which were enriched for cell cycle function ( $p=0.011$  for fly  
6 gene enrichment and  $p=1.12 \times 10^{-8}$  for human homologs, Fisher's Exact test with Benjamini-  
7 Hochberg correction). **(C)** Diagram showing human cell cycle and apoptosis genes whose fly  
8 homologs are differentially expressed with knockdown of *Cbp20* and *Fsn*, as well as  
9 concomitant knockdown of *Cbp20/Fsn*. Red boxes indicate apoptosis genes, green boxes  
10 indicate cell cycle genes, and yellow boxes indicate genes associated with both functions. **(D)**  
11 Enrichments of human homologs of genes differentially expressed in flies with knockdown of  
12 *Cbp20/Fsn* across different brain tissues and developmental timepoints are shown (Specific  
13 Expression Analysis). The size of each hexagon represents the number of genes preferentially  
14 expressed at each tissue and timepoint, with concentric hexagons representing bins of genes  
15 with stronger levels of preferential expression. The shading of each hexagon represents the  
16 enrichment of differentially-expressed genes among genes preferentially expressed at each  
17 timepoint ( $p < 0.1$ , Fisher's Exact test with Benjamini-Hochberg correction). A list of full  
18 genotypes for fly crosses used in these experiments is provided in **Supplementary File 2.**

19

20 **Figure 3—Figure Supplement 5.** Connectivity of 3q29 genes in human gene interaction  
21 databases. **(A)** Genetic interactions of 3q29 genes in the context of a general human gene  
22 interaction network (GeneMania). The strongly connected component includes 11 out of the  
23 21 total 3q29 genes. Black-shaded nodes represent the input 3q29 genes, while grey nodes  
24 represent connector genes in the network. Edge color represents the interaction data source  
25 (purple: co-expression, orange: predicted interaction), while edge thickness represents  
26 weighted scores for each interaction. **(B)** Genetic interactions of 19 genes in the 3q29 region  
27 in the context of a brain-specific human gene interaction network (GIANT). Large nodes  
28 represent the input 3q29 genes, while small nodes represent connector genes in the network.  
29 Edge color represents the weighted score for each interaction, from low-weighted  
30 connectivity (green) to high-weighted connectivity (red). **(C)** Histograms and smoothed  
31 normal distributions showing the average connectivity among genes in the 3q29 region (blue)  
32 along with two other large CNVs, 16p11.2 (red) and 22q11.2 deletion (green), within a brain-  
33 specific gene interaction network. Average connectivity is measured as the shortest weighted  
34 distance between two genes, with lower values representing stronger connectivity. Genes

1 within the 3q29 and 22q11.2 deletions were not significantly more connected to each other  
2 ( $p > 0.05$ , one-tailed Mann-Whitney test with Benjamini-Hochberg correction) than random  
3 sets of 21 genes throughout the genome (grey). However, genes within the 16p11.2 region  
4 were significantly more connected to each other than the random gene sets ( $p = 0.003$ , one-  
5 tailed Mann-Whitney test with Benjamini-Hochberg correction). **(D)** Pairwise connectivity of  
6 individual 3q29 genes within a brain-specific gene interaction network, excluding six genes  
7 not present in the network (*RNF168*, *ZDHHC19*, *LRRC33*, *OSTalpha*, *SMCO1*, and  
8 *TCTEX1D2*). Average connectivity is measured as the shortest weighted distance between  
9 two genes, with lower values representing stronger connectivity. Underlined genes have a  
10 higher average connectivity ( $p < 0.05$ , one-tailed Mann-Whitney test with Benjamini-  
11 Hochberg correction) to other genes in the region compared with random sets of 21 genes  
12 throughout the genome.

13

14

15 **Figure 4.** Cellular phenotypes with pairwise knockdown of fly homologs of 3q29 genes. **(A)**  
16 Representative brightfield adult eye images (scale bar = 100  $\mu\text{m}$ ) show that heterozygous  
17 *GMR-GAL4* RNAi knockdown of *dlg1* enhanced the rough eye phenotype and necrotic  
18 patches (yellow circles) of flies heterozygous or homozygous for *Cbp20* RNAi. **(B)**  
19 Representative confocal images of pupal eyes (scale bar = 5  $\mu\text{m}$ ) stained with anti-DLG  
20 illustrate enhanced defects in ommatidial organization upon concomitant knockdown of  
21 *Cbp20* with other fly homologs of 3q29 genes compared with *Cbp20* knockdown. Yellow  
22 circles in DLG images indicate cone cell defects, white circles indicate bristle cell defects,  
23 yellow arrows indicate rotation defects, and yellow arrowheads indicate secondary cell  
24 defects. To account for reduced DLG expression in pupal eyes with knockdown of  
25 *Cbp20/dlg1*, images were taken at a higher intensity than control images (see Methods). **(C)**  
26 Representative confocal images of pupal eyes (scale bar = 5  $\mu\text{m}$ ) stained with Phalloidin  
27 illustrate enhanced defects in photoreceptor cell count and organization upon concomitant  
28 knockdown of *Cbp20* and other fly homologs of 3q29 genes compared with *Cbp20*  
29 knockdown. **(D)** Representative confocal images of larval eye discs (scale bar = 30  $\mu\text{m}$ )  
30 stained with anti-dcp1 (top) and anti-pH3 (bottom) show enhanced defects in apoptosis and  
31 cell proliferation with pairwise knockdown of *Cbp20* and other fly homologs of 3q29 genes  
32 compared with recombined *Cbp20* knockdown. **(E)** Boxplot of dcp1-positive cells in the  
33 larval eye discs of flies with pairwise knockdown of homologs of 3q29 genes ( $n = 10-11$ ,  
34  $*p < 0.05$ , two-tailed Mann-Whitney test with Benjamini-Hochberg correction). **(F)** Boxplot

1 of pH3-positive cells in the larval eye discs of flies with pairwise knockdown of homologs of  
2 3q29 genes (n = 10–12, \*p < 0.05, two-tailed Mann–Whitney test with Benjamini-Hochberg  
3 correction). All boxplots indicate median (center line), 25th and 75th percentiles (bounds of  
4 box), and minimum and maximum (whiskers), with red dotted lines representing the control  
5 median. A list of full genotypes for fly crosses used in these experiments is provided in  
6 **Supplementary File 2.**

7  
8 **Figure 4—Figure Supplement 1.** Cellular phenotypes for pairwise knockdowns of  
9 homologs of 3q29 genes. (A) Box plot showing area of necrotic patches in adult fly eyes with  
10 heterozygous or homozygous *Cbp20* RNAi and concomitant knockdown of *Fsn* or *dlg1* (n=8-  
11 9, \*p < 0.05, two-tailed Mann–Whitney test with Benjamini-Hochberg correction). (B)  
12 Confocal images of pupal eyes (scale bar = 5 μm) stained with DLG (top) and Phalloidin  
13 (bottom) illustrate enhanced defects in ommatidial and photoreceptor cell organization with  
14 concomitant *GMR-GAL4* RNAi knockdown of *Cbp20* and other fly homologs of 3q29 genes  
15 compared with *Cbp20* knockdown. (C) Larval eye discs (scale bar = 30 μm) stained with  
16 TUNEL show increases in apoptosis with pairwise knockdown of *Cbp20* and other fly  
17 homologs of 3q29 genes compared with recombined *Cbp20* knockdown. (D) Box plot of  
18 TUNEL-positive cells in the larval eye discs of flies with pairwise knockdown of homologs  
19 of 3q29 genes (n = 9–13, \*p < 0.05, two-tailed Mann–Whitney test with Benjamini-Hochberg  
20 correction). All boxplots indicate median (center line), 25th and 75th percentiles (bounds of  
21 box), and minimum and maximum (whiskers), with red dotted lines representing the control  
22 median. A list of full genotypes for fly crosses used in these experiments is provided in  
23 **Supplementary File 2.**

24  
25 **Figure 4—Figure Supplement 2.** Analysis of defects in ommatidial cells with pairwise  
26 *GMR-GAL4* RNAi knockdown of fly homologs of 3q29 genes. The number of “+” symbols  
27 displayed in the table indicate the severity of the observed cellular defects. Note that n=4-16  
28 pupal eye preparations were assessed for each interaction cross tested. A list of full genotypes  
29 for fly crosses used in these experiments is provided in **Supplementary File 2.**

30  
31  
32 **Figure 5.** Rescue of cellular phenotypes due to knockdown of fly homologs of 3q29 genes  
33 with overexpression of the apoptosis inhibitor *Diap1*. (A) Representative brightfield adult eye  
34 images (scale bar = 100 μm) show rescue of rough eye phenotypes for flies with concomitant

1 *GMR-GAL4* RNAi knockdown of *Cbp20* or *dlg1* and overexpression of *Diap1*, as well as  
2 enhanced (Enh.) phenotypes with overexpression of caspase-9 homolog *Dronc*. (B) Boxplot  
3 of phenotypic scores for flies with knockdown of *Cbp20* or *dlg1* and overexpression of *Diap1*  
4 or *Dronc* (n = 8–9, \*p < 0.05, two-tailed Mann–Whitney test with Benjamini-Hochberg  
5 correction) is shown. (C) Box plot showing area of necrotic patches in adult fly eyes with  
6 knockdown of *Cbp20* and overexpression of *Dronc* (n=9, \*p=3.27×10<sup>-5</sup>, one-tailed Mann–  
7 Whitney test) is shown. (D) Confocal images of pupal eyes (scale bar = 5 μm) stained with  
8 anti-DLG illustrate the rescue of ommatidial organization defects due to knockdown of  
9 *Cbp20* or *dlg1* upon overexpression of *Diap1*. Yellow circles in DLG images indicate cone  
10 cell defects, white circles indicate bristle cell defects, yellow arrows indicate rotation defects,  
11 and yellow arrowheads indicate secondary cell defects. To account for reduced DLG  
12 expression in pupal eyes with knockdown of *dlg1*, images were taken at a higher intensity  
13 than control images (see Methods). (E) Larval eye discs (scale bar = 30 μm) stained with anti-  
14 dcp1 show rescue of apoptosis phenotypes observed in flies with *Cbp20* and *dlg1* knockdown  
15 upon *Diap1* overexpression as well as enhanced (Enh.) phenotypes upon *Dronc*  
16 overexpression. (F) Boxplot of dcp1-positive cells in the larval eye discs of flies with  
17 knockdown of *Cbp20* or *dlg1* and *Diap1* or *Dronc* overexpression (n = 9–18, \*p < 0.05, two-  
18 tailed Mann–Whitney test with Benjamini-Hochberg correction). (G) Representative confocal  
19 images of larval eye discs stained with anti-chaoptin (scale bar = 30 μm) illustrate the  
20 suppression (Supp.) of axonal targeting defects (white arrows) observed in flies due to  
21 knockdown of *Cbp20* or *dlg1* with overexpression of *Diap1*. Note that n=8-18 larval eye disc  
22 preparations were assessed for each interaction cross tested. All boxplots indicate median  
23 (center line), 25th and 75th percentiles (bounds of box), and minimum and maximum  
24 (whiskers), with red dotted lines representing the control median. A list of full genotypes for  
25 fly crosses used in these experiments is provided in **Supplementary File 2**.

26

27 **Figure 5—Figure Supplement 1.** Rescue of cellular phenotypes due to knockdown of fly  
28 homologs of 3q29 genes with overexpression of *Diap1*. (A) Cellular phenotypes of flies with  
29 overexpression of *Diap1* and *Dronc*. Representative brightfield adult eye images (scale bar =  
30 100 μm), confocal images of larval eye discs (scale bar = 30 μm) stained with anti-dcp1, and  
31 confocal images of pupal eyes (scale bar = 5 μm) stained with anti-DLG are shown for flies  
32 with *GMR-GAL4* overexpression of *Diap1* and *Dronc*. While the overexpression of *Diap1*  
33 did not lead to any changes in the pupal or adult eye phenotype, overexpression of *Dronc*  
34 resulted in a large increase in apoptosis and depigmentation in the adult eye. (B) Box plot of

1 *Flynotyper* distance ommatidial disorderliness (OD) scores for flies with concomitant *GMR-*  
2 *GAL4* RNAi knockdown of *Cbp20* or *dlg1* and overexpression of *Diap1* or *Dronc* (n = 8–9,  
3 \*p < 0.05, two-tailed Mann–Whitney test with Benjamini-Hochberg correction) is shown. (C)  
4 Box plot of *Flynotyper* angle OD scores for flies with knockdown of *Cbp20* or *dlg1* and  
5 overexpression of *Diap1* or *Dronc* (n = 8–9, \*p < 0.05, two-tailed Mann–Whitney test with  
6 Benjamini-Hochberg correction) is shown. The distance and angle OD scores, component  
7 subscores derived from *Flynotyper* (Iyer et al., 2016), mirror the trends observed in the  
8 overall phenotypic scores (Figure 5B). (D) Box plot of adult eye area in flies with  
9 knockdown of *Cbp20* or *dlg1* and overexpression of *Diap1* or *Dronc* (n = 8–9, \*p < 0.05, two-  
10 tailed Mann–Whitney test with Benjamini-Hochberg correction). (E) Confocal images of  
11 pupal eyes (scale bar = 5 μm) stained with Phalloidin illustrate the rescue of photoreceptor  
12 cell organization defects due to knockdown of *Cbp20* or *dlg1* upon overexpression of *Diap1*.  
13 (F) Larval eye discs (scale bar = 30 μm) stained with TUNEL show rescue of apoptosis  
14 phenotypes observed in flies with knockdown of *Cbp20* or *dlg1* and overexpression of *Diap1*,  
15 as well as enhanced apoptosis with overexpression of *Dronc*. (G) Box plot of TUNEL-  
16 positive cells in the larval eye discs of flies with knockdown of *Cbp20* or *dlg1* and  
17 overexpression of *Diap1* or *Dronc* (n = 7–10, \*p < 0.05, two-tailed Mann–Whitney test with  
18 Benjamini-Hochberg correction). All boxplots indicate median (center line), 25th and 75th  
19 percentiles (bounds of box), and minimum and maximum (whiskers), with red dotted lines  
20 representing the control median. A list of full genotypes for fly crosses used in these  
21 experiments is provided in **Supplementary File 2**.

22

23

24 **Figure 6.** Pairwise interactions between fly homologs of 3q29 genes and other  
25 neurodevelopmental genes. (A) Heatmap showing the average changes in phenotypic scores  
26 for the *GMR-GAL4* pairwise RNAi knockdown of fly homologs for 3q29 genes and other  
27 neurodevelopmental genes (along with their human counterparts) in the adult eye, compared  
28 with recombined lines for individual homologs of 3q29 genes. (B) Representative brightfield  
29 adult eye images of flies with pairwise knockdown of fly homologs for 3q29 genes and  
30 known neurodevelopmental genes (scale bar = 100 μm) show enhancement (Enh.) or  
31 suppression (Supp.) of rough eye phenotypes and necrotic patches compared with flies with  
32 knockdown of individual homologs of neurodevelopmental genes. A list of full genotypes for  
33 fly crosses used in these experiments is provided in **Supplementary File 2**.

34

1 **Figure 6—Figure Supplement 1.** Screening for interactions between fly homologs of 3q29  
2 genes and other known neurodevelopmental genes. “All interactions” indicates the number of  
3 crosses where at least one second-hit RNAi line showed enhancement of the single-hit  
4 phenotype, while “Validated interactions” indicates the number of interactions which have  
5 two or more crosses with a second-hit RNAi or mutant line (if available) showing the same  
6 result. Results from two distinct fly homologs of *CHRNA7* that were crossed with homologs  
7 of 3q29 genes, *nAChRa6* and *nAChRa7*, were combined for the final number of interactions.  
8 Shaded interactions indicate pairwise crosses where the phenotypes observed with  
9 knockdown of the fly homolog for the neurodevelopmental gene by itself were suppressed  
10 upon concomitant knockdown of homologs for 3q29 genes. The tested neurodevelopmental  
11 genes are annotated for cell cycle/apoptosis function (Gene Ontology terms GO:0007049 and  
12 GO:0006915) as well as association with microcephaly disorders (Nicholas et al., 2009). A  
13 list of full genotypes for fly crosses used in these experiments is provided in **Supplementary**  
14 **File 2.**

15  
16 **Figure 6—Figure Supplement 2.** Phenotypic scores for interactions between homologs of  
17 3q29 genes and known neurodevelopmental genes in the adult fly eye. (A-D) Box plots of  
18 phenotypic scores for concomitant *GMR-GAL4* RNAi knockdown of fly homologs of 3q29  
19 genes and neurodevelopmental genes, compared with recombined lines for individual  
20 homologs of 3q29 genes (n = 2–10, \*p < 0.05, two-tailed Mann–Whitney test with Benjamini-  
21 Hochberg correction). All boxplots indicate median (center line), 25th and 75th percentiles  
22 (bounds of box), and minimum and maximum (whiskers), with red dotted lines representing  
23 the control median. A list of full genotypes for fly crosses used in these experiments is  
24 provided in **Supplementary File 2.**

25  
26  
27 **Figure 7.** Developmental phenotypes observed with knockdown of homologs of 3q29 genes  
28 in *X. laevis* models. (A) To study brain morphology upon knockdown of *X. laevis* homologs  
29 of genes in the 3q29 region, one cell in a two-cell embryo was injected with single or  
30 multiple MOs for homologs of 3q29 genes while the other cell remained uninjected.  
31 Representative images of stage 47 *X. laevis* tadpoles (scale bar = 500  $\mu$ m) with MO  
32 knockdown of *ncbp2*, *fxbo45* and *pak2* show morphological defects and decreased size,  
33 including decreased forebrain (highlighted in red on the control image) and midbrain  
34 (highlighted in yellow) area, compared with control tadpoles. Pairwise knockdown of *fxbo45*



1 and *ncbp2* enhanced these phenotypes, which were also rescued with overexpression of *xiap*.  
2 (B) Box plot of forebrain area in *X. laevis* models with knockdown of homologs of 3q29  
3 genes, normalized to controls (n = 30–63, \*p < 0.05, two-tailed Welch's T-test with  
4 Benjamini-Hochberg correction). Red box indicates rescue of decreased *ncbp2* forebrain area  
5 with overexpression of the apoptosis inhibitor *xiap*. (C) Box plot of midbrain area in *X. laevis*  
6 models with knockdown of homologs of 3q29 genes, normalized to controls (n = 30–63,  
7 \*p < 0.05, two-tailed Welch's T-test with Benjamini-Hochberg correction). Red box indicates  
8 rescue of decreased *ncbp2* midbrain area with overexpression of the apoptosis inhibitor *xiap*.  
9 (D) Western blot analysis of *X. laevis* whole embryos show increased levels of cleaved  
10 caspase-3 with knockdown of homologs of 3q29 genes, including enhanced caspase-3 levels  
11 with knockdown of multiple homologs of 3q29 genes and rescued levels with *xiap*  
12 overexpression (red box).  $\beta$ -actin was used as a loading control on the same blot.  
13 Representative western blot images shown are cropped; the full blots for both replicates are  
14 provided in **Figure 7—Figure Supplement 1C**. (E) Quantification of western blot band  
15 intensity for caspase-3 levels, normalized to the loading control. All boxplots indicate median  
16 (center line), 25th and 75th percentiles (bounds of box), and minimum and maximum  
17 (whiskers), with red dotted lines representing the control median. The data shown for the  
18 brain area experiments represent pooled results of three experimental batches, and were  
19 normalized to the respective controls from each batch. *X. laevis* embryo diagrams were  
20 produced by Nieuwkoop and Farber (Nieuwkoop and Faber, 1994) and provided by Xenbase  
21 (Karimi et al., 2018).

22

23 **Figure 7—Figure Supplement 1.** Quantification of 3q29 morpholino knockdown and  
24 apoptosis marker levels in *X. laevis* models. (A) Electrophoretic gels show decreased  
25 expression of homologs of 3q29 genes due to morpholino (MO) knockdown at various  
26 concentrations in *X. laevis* embryos. Three replicates (uninjected and two MO  
27 concentrations) were performed for each morpholino, and band intensities were compared  
28 with expression of *ODCI* controls taken from the same cDNA samples and run on gels  
29 processed in parallel. (B) Quantification of expression for homologs of 3q29 genes at  
30 different MO concentrations, as measured by band intensity ratio to *ODCI* controls (n=3  
31 replicates, \*p<0.05, two-tailed Welch's T-test with Benjamini-Hochberg correction). (C) Full  
32 images of western blots for quantification of cleaved caspase-3 levels in *X. laevis* embryos  
33 with MO knockdown of homologs of 3q29 genes. Two replicate experiments were  
34 performed, and the intensity of bands at 19kD and 17kD (green arrows), corresponding with

1 caspase-3, were normalized to those for the  $\beta$ -actin loading controls. Embryos injected with  
2 control MO, uninjected embryos, and embryos treated with 30% EtOH as a positive control  
3 were included with the embryos injected with 3q29 MOs.

4  
5 **Figure 7—Figure Supplement 2.** Eye phenotypes observed with knockdown of homologs of  
6 3q29 genes in *X. laevis* models. (A) Representative eye images of stage 42 *X. laevis* tadpoles  
7 with MO knockdown of homologs of 3q29 genes (scale bar = 500  $\mu$ m) show defects in eye  
8 size and morphology compared with the control (top). These defects were rescued with co-  
9 injection and overexpression of mRNA for homologs of 3q29 genes, as well as  
10 overexpression of the apoptosis inhibitor *xiap* for *ncbp2* (bottom). (B) Box plot of eye area in  
11 *X. laevis* models with knockdown of homologs of 3q29 genes, normalized to controls  
12 ( $n = 48-71$ ,  $*p < 0.05$ , two-tailed Welch's T-test with Benjamini-Hochberg correction).  
13 Models with *ncbp2* knockdown and *xiap* overexpression showed an increased eye size  
14 compared with *ncbp2* knockdown. (C) Box plot of eye area in *X. laevis* models with  
15 knockdown of homologs of 3q29 genes and overexpression of mRNA for homologs of 3q29  
16 genes, normalized to controls ( $n = 56-63$ ,  $*p < 0.05$ , two-tailed Welch's T-test with  
17 Benjamini-Hochberg correction). All boxplots indicate median (center line), 25th and 75th  
18 percentiles (bounds of box), and minimum and maximum (whiskers), with red dotted lines  
19 representing the control median. The data shown for the eye area experiments represent  
20 pooled results of three experimental batches, and were normalized to the respective controls  
21 from each batch.

22  
23 **Figure 7—Figure Supplement 3.** Morpholinos used for *X. laevis* experiments.

24  
25 **Figure 7—Figure Supplement 4.** qPCR primers used for *X. laevis* experiments.

26  
27  
28 **Figure 8.** Interactions between *NCBP2* and other homologs of 3q29 genes contribute to the  
29 neurodevelopmental phenotypes of the deletion. (A) We identified 44 interactions between  
30 pairs of *Drosophila* homologs of 3q29 genes. With the exception of *Ulp1* (*SENP5*), the  
31 cellular phenotypes of each homolog were significantly enhanced with simultaneous  
32 knockdown of *Cbp20*. While other homologs of 3q29 genes also interact with each other, our  
33 data suggest that *Cbp20* is a key modulator of cellular phenotypes within the deletion region.  
34 (B) Schematic representing the network context of *NCBP2* and other genes in the 3q29 region

1 towards the observed deletion phenotypes. We propose that the effect of disruption of *NCBP2*  
2 propagates through a network of functionally-related genes, including other 3q29 genes  
3 (highlighted in blue), leading to a cascade of disruptions in key biological pathways,  
4 including apoptosis. These pathways jointly contribute towards the observed  
5 neurodevelopmental phenotypes in individuals carrying the entire deletion.

6  
7 **Figure 8—Figure Supplement 1.** Comparison of mice with heterozygous deletion of the  
8 syntenic 3q29 region (Baba et al., 2019; Rutkowski et al., 2019) with heterozygous knockout  
9 mouse models for *Dlg1* (Rutkowski et al., 2019) and *Pak2* (Wang et al., 2018). Blue shaded  
10 boxes indicate phenotypes observed in the knockout models, while gray-shaded boxes  
11 indicate a phenotype that was not tested in the knockout model. Neither *Dlg1*<sup>+/-</sup> nor *Pak2*<sup>+/-</sup>  
12 knockout mice recapitulate the body and brain weight, spatial learning and memory, or  
13 acoustic startle defects observed in the deletion mouse models.

14  
15 **Figure 8—Figure Supplement 2.** Summary of apoptosis function enrichment among  
16 candidate neurodevelopmental genes. This table shows the number of candidate autism,  
17 intellectual disability and schizophrenia genes annotated for apoptosis function. The  
18 minimum, mean and maximum numbers of apoptosis genes in 100,000 simulated sets of  
19 candidate genes are shown, along with the percentiles and empirical p-values of the observed  
20 apoptosis overlap for each simulation.

21

## 1 SUPPLEMENTARY FILES AND LEGENDS

2

3 **Supplementary File 1 (Excel file).** Pathogenicity metrics, mutations in disease cohorts, and  
4 biological functions of 3q29 genes. 3q29 genes with Residual Variation Intolerance Scores  
5 (RVIS) <20<sup>th</sup> percentile (Petrovski et al., 2013) or probability of Loss-of-function Intolerant  
6 (pLI) scores >0.9 (Lek et al., 2016) are considered to be potentially pathogenic in humans and  
7 are shaded in gray. Mutations within 3q29 genes identified in disease cohorts were curated  
8 from three databases: denovo-db v.1.6.1 (Turner et al., 2017), GeneBook database  
9 (<http://atgu.mgh.harvard.edu/~spurcell/genebook/genebook.cgi>); and SFARI Gene  
10 (Abrahams et al., 2013). Molecular functions for 3q29 genes were derived from RefSeq,  
11 UniProtKB and Gene Ontology (GO) individual gene summaries (O’Leary et al., 2016;  
12 The Gene Ontology Consortium, 2019; UniProt Consortium, 2018), and GO SLIM terms for  
13 human genes and fly homologs were curated from PantherDB (Mi et al., 2017). Annotations  
14 for cell cycle/apoptosis and neuronal function were derived from GO Biological Process  
15 annotations for each gene.

16

17 **Supplementary File 2 (Excel file).** List of fly stocks and full genotypes for all crosses tested.  
18 This file lists the stock lines, stock center, and genotypes for primary and validation lines for  
19 fly homologs of 3q29 genes as well as neurodevelopmental and apoptosis genes outside of  
20 the 3q29 region. Full genotypes for all individual and pairwise crosses tested in the  
21 manuscript are also listed in the file. BDSC: Bloomington *Drosophila* Stock Center; VDRC:  
22 Vienna *Drosophila* Resource Center.

23

24 **Supplementary File 3 (Excel file).** Transcriptome analysis of flies with knockdown of  
25 homologs of 3q29 genes. This file lists all differentially expressed genes from RNA  
26 sequencing of flies with *Elav-GAL4* RNAi knockdown of homologs of 3q29 genes, as  
27 defined by log-fold change >1 or < -1 and false discovery rate (FDR) <0.05 (Benjamini-  
28 Hochberg correction). Human homologs identified using DIOPT are included for each  
29 differentially-expressed fly gene. The file also includes enriched Gene Ontology (GO) terms  
30 (p<0.05, Fisher’s Exact test with Benjamini-Hochberg correction) for each set of  
31 differentially-expressed fly genes, as well as lists of GO terms enriched among their  
32 corresponding human homologs.

1 **Supplementary File 4 (Excel file).** List of candidate neurodevelopmental genes with  
2 apoptosis function. This file lists 525 candidate neurodevelopmental genes that are annotated  
3 for apoptosis GO terms, including their membership within pathogenic CNVs.

4  
5 **Supplementary File 5 (Excel file).** Statistical analysis of experimental data. This file shows  
6 all statistical information (sample size, mean/median/standard deviation of datasets, Shapiro-  
7 Wilk test statistics for normality, statistical test and controls used, test statistics, p-values,  
8 confidence intervals, and Benjamini-Hochberg FDR corrections) for all data presented in the  
9 main and supplemental figures. Statistical information for ANOVA tests includes factors,  
10 degrees of freedom, test statistics, and post-hoc pairwise t-tests with Benjamini-Hochberg  
11 correction.

12  
13

#### 14 **VIDEO LEGENDS**

15

16 **Video 1. Climbing ability of flies with knockdown of individual homologs of 3q29 genes.**

17 This video shows the climbing ability of *Elav-GAL4* control, *Cbp20* and *dlg1* individual  
18 RNAi knockdown flies at day 10 of the climbing ability experiments.

19

20 **Video 2. Climbing ability of flies with pairwise knockdowns of homologs of 3q29 genes.**

21 This video shows the climbing ability of *Cbp20/dlg1* and *Cbp20/Fsn* pairwise *Elav-GAL4*  
22 RNAi knockdown flies at day 10 of the climbing ability experiments.

23

**Table 1.** Summary of major experiments for knockdown of homologs of 3q29 genes show widespread cellular and neuronal defects.

| Experiment                             |                              | RNAi knockdown of <i>Drosophila</i> homologs of 3q29 genes      |                                      |                                       |                                  |                             |                    |                    |
|----------------------------------------|------------------------------|-----------------------------------------------------------------|--------------------------------------|---------------------------------------|----------------------------------|-----------------------------|--------------------|--------------------|
| Phenotype                              | Assay                        | <i>Cbp20</i>                                                    | <i>dlg1</i>                          | <i>Cbp20/dlg1</i>                     | <i>Cbp20/Fsn</i>                 | <i>Cbp20/CG8888</i>         | <i>Cbp20/Diap1</i> | <i>dlg1/Diap1</i>  |
| Adult eye morphology                   | Rough eye phenotype          | Rough eye                                                       | Rough eye                            | Enhanced rough eye                    | Enhanced rough eye               | Enhanced rough eye          | Rescue             | Rescue             |
|                                        | Necrotic patches             | None (Present in homozygous KD)                                 | None                                 | Yes (more severe in homozygous KD)    | Yes                              | None                        | None               | None               |
|                                        | Eye area                     | Decreased area                                                  | Increased area                       | NA                                    | NA                               | NA                          | Rescue             | Rescue             |
| Neuronal phenotypes                    | Climbing ability             | Climbing defects                                                | Climbing defects                     | Enhanced climbing defects             | Enhanced climbing defects        | NA                          | NA                 | NA                 |
|                                        | Axonal targeting             | Axon targeting defects                                          | Axon targeting defects               | Enhanced targeting defects            | Enhanced targeting defects       | NA                          | Rescue             | Rescue             |
| Cell organization (pupal eye)          | DLG staining                 | Cellular defects                                                | Cellular defects                     | Enhanced cellular defects             | Enhanced cellular defects        | Enhanced cellular defects   | Rescue             | Rescue             |
|                                        | Phalloidin staining          | Loss of photoreceptors                                          | Loss of photoreceptors               | No change                             | Enhanced photoreceptor loss      | Enhanced photoreceptor loss | Rescue             | Rescue             |
| Cell cycle (larval eye disc)           | pH3 staining                 | No change                                                       | No change                            | No change                             | No change                        | Decreased proliferation     | NA                 | NA                 |
|                                        | BrdU staining                | No change                                                       | Increased proliferation              | NA                                    | NA                               | NA                          | NA                 | NA                 |
| Apoptosis (larval eye disc)            | dcp1 staining                | Increased apoptosis                                             | Increased apoptosis                  | Increased apoptosis                   | Increased apoptosis              | Increased apoptosis         | Rescue             | Rescue             |
|                                        | TUNEL assay                  | Increased apoptosis                                             | Increased apoptosis                  | Increased apoptosis                   | Increased apoptosis              | Increased apoptosis         | Rescue             | Rescue             |
| Cellular phenotypes (larval wing disc) | pH3 staining                 | Decreased proliferation                                         | Increased proliferation              | NA                                    | NA                               | NA                          | NA                 | NA                 |
|                                        | dcp1 staining                | Increased apoptosis                                             | Increased apoptosis                  | NA                                    | NA                               | NA                          | NA                 | NA                 |
| RNA sequencing (adult heads)           | Differential gene expression | Synaptic transmission, metabolism                               | Synaptic transmission, ion transport | Cellular respiration, protein folding | Cell cycle, response to stimulus | NA                          | NA                 | NA                 |
| Experiment                             |                              | Morpholino knockdown of <i>X. laevis</i> homologs of 3q29 genes |                                      |                                       |                                  |                             |                    |                    |
| Phenotype                              | Assay                        | <i>ncbp2</i>                                                    | <i>fbxo45</i>                        | <i>pak2</i>                           | <i>ncbp2/fbxo45</i>              | <i>ncbp2/pak2</i>           | <i>ncbp2/xiap</i>  | <i>fbxo45/xiap</i> |
| Craniofacial morphology                | Eye area                     | Decreased area                                                  | Decreased area                       | Decreased area                        | NA                               | NA                          | Rescue             | NA                 |
|                                        | Midbrain area                | Decreased area                                                  | Decreased area                       | Decreased area                        | No change                        | No change                   | Rescue             | NA                 |
|                                        | Forebrain area               | Decreased area                                                  | Decreased area                       | Decreased area                        | Decreased area                   | No change                   | Rescue             | NA                 |
| Apoptosis                              | Cleaved caspase-3 levels     | Increased caspase-3                                             | Increased caspase-3                  | NA                                    | Increased caspase-3              | NA                          | Rescue             | Rescue             |



# Figure 1

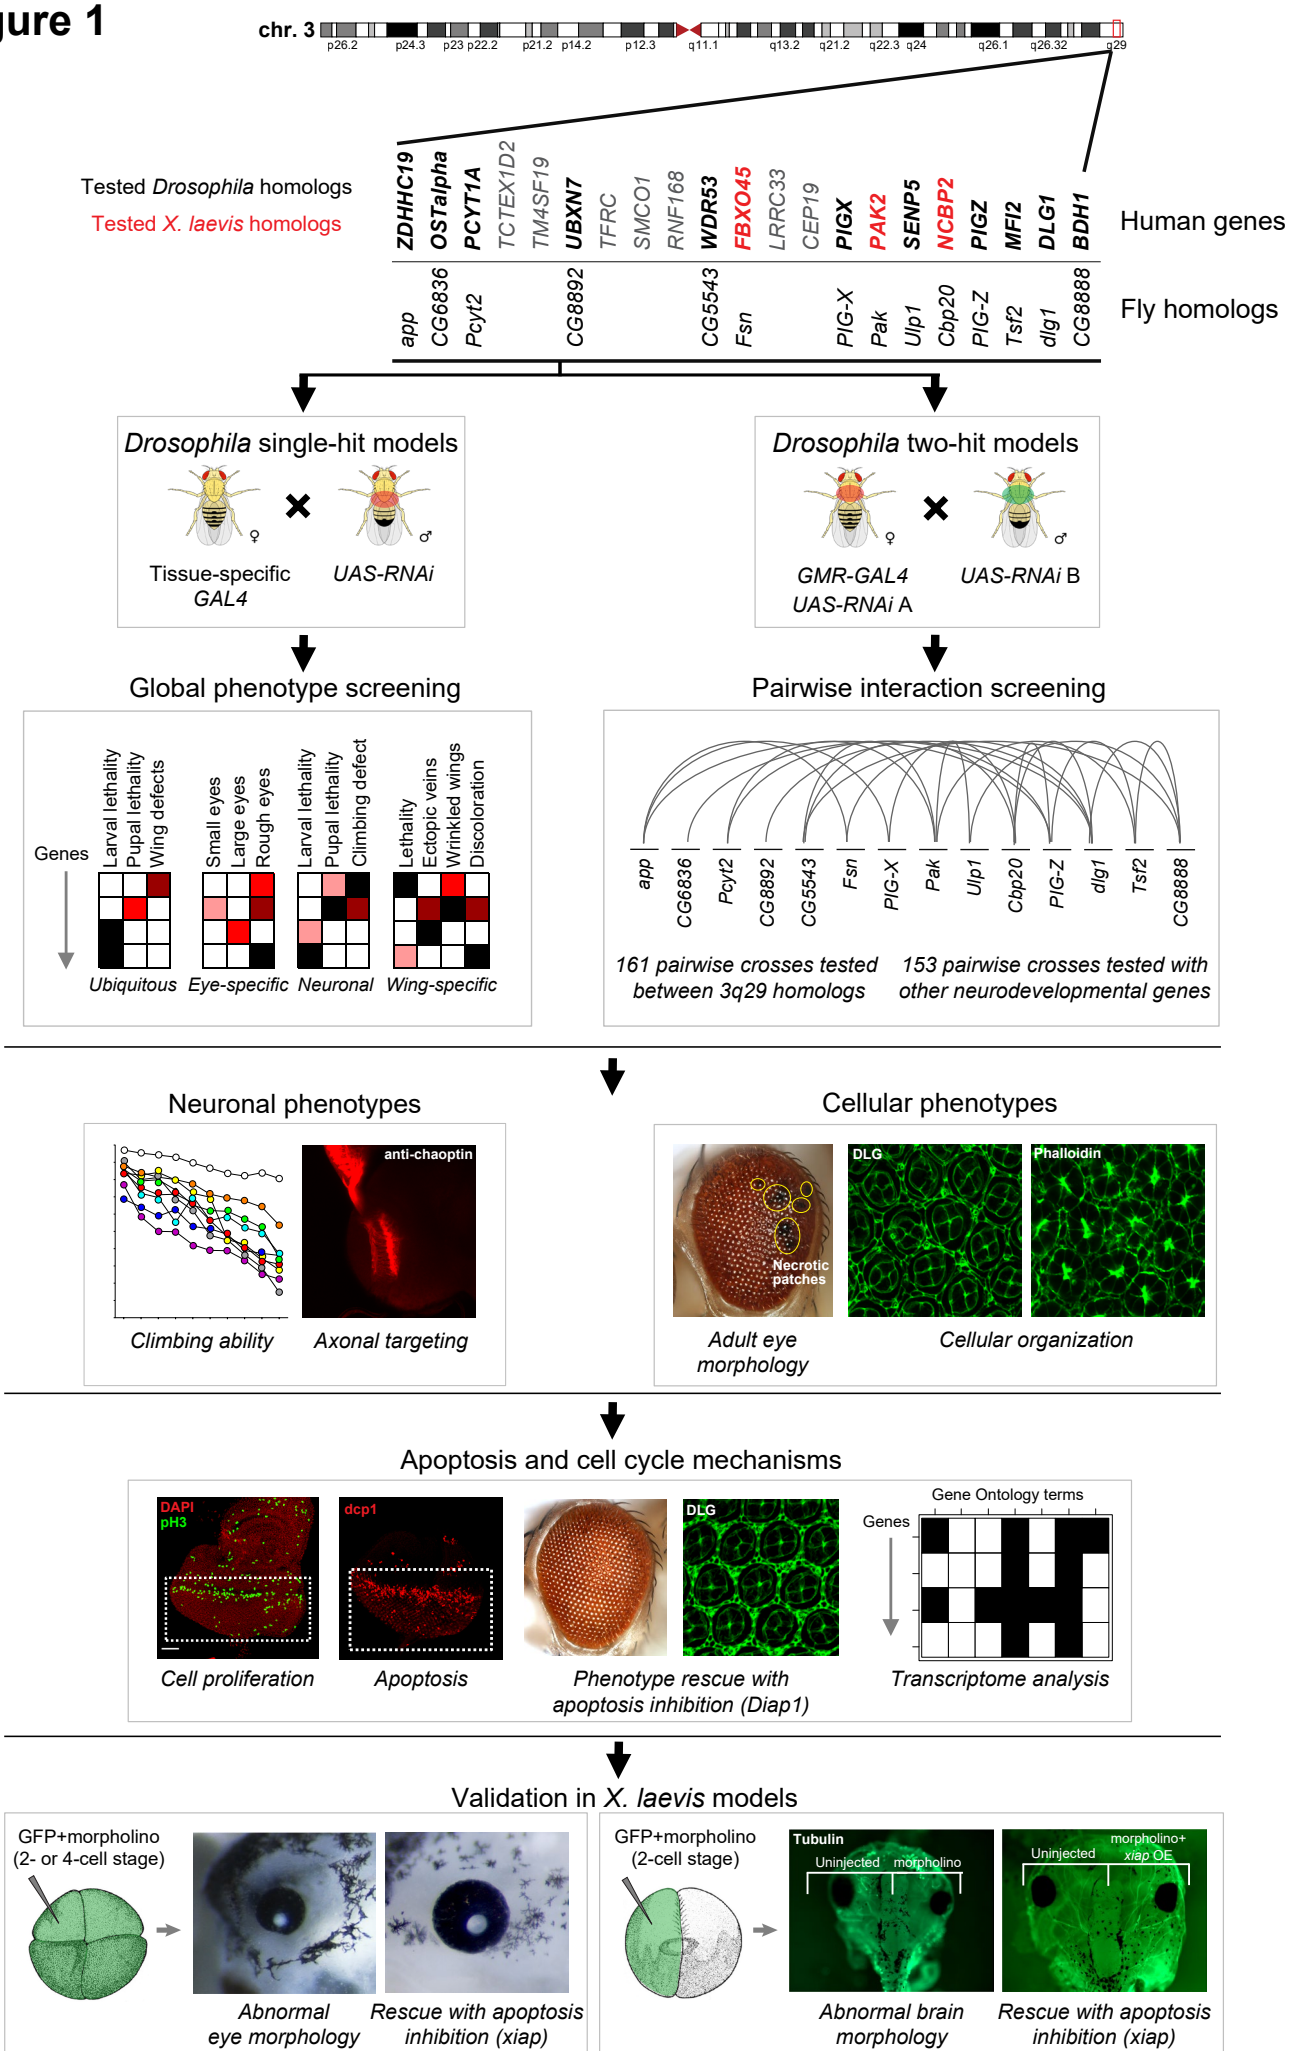

**Figure 1--Figure Supplement 1**

| <b>Human gene</b> | <b>Fly homolog</b> | <b>Identity (%)</b> | <b>Similarity (%)</b> | <b>DIOPT score</b> | <b>DIOPT rank</b> | <b>Larval central nervous system expression (FlyAtlas)</b> | <b>Larval eye expression (modENCODE)</b> |
|-------------------|--------------------|---------------------|-----------------------|--------------------|-------------------|------------------------------------------------------------|------------------------------------------|
| <i>BDH1</i>       | <i>CG8888</i>      | 33                  | 53                    | 9                  | High              | Low                                                        | NA                                       |
| <i>DLG1</i>       | <i>dlg1</i>        | 44                  | 58                    | 13                 | High              | Moderate                                                   | Moderate                                 |
| <i>FBXO45</i>     | <i>Fsn</i>         | 71                  | 84                    | 13                 | High              | Moderate                                                   | Moderate                                 |
| <i>MFI2</i>       | <i>Tsf2</i>        | 33                  | 48                    | 15                 | High              | Low                                                        | Moderate                                 |
| <i>NCBP2</i>      | <i>Cbp20</i>       | 78                  | 89                    | 14                 | High              | Moderate                                                   | Moderate                                 |
| <i>OSTalpha</i>   | <i>CG6836</i>      | 19                  | 40                    | 5                  | High              | Low                                                        | Low                                      |
| <i>PAK2</i>       | <i>Pak</i>         | 42                  | 50                    | 10                 | Moderate          | NA                                                         | Moderate                                 |
| <i>PCYT1A</i>     | <i>Pcyt2</i>       | 58                  | 72                    | 12                 | High              | Moderate                                                   | Moderate                                 |
| <i>PIGX</i>       | <i>PIG-X</i>       | 24                  | 39                    | 7                  | High              | Low                                                        | Low                                      |
| <i>PIGZ</i>       | <i>PIG-Z</i>       | 30                  | 41                    | 10                 | High              | NA                                                         | Low                                      |
| <i>SENP5</i>      | <i>Ulp1</i>        | 21                  | 35                    | 2                  | Low               | Moderate                                                   | Low                                      |
| <i>TCTEX1D2</i>   | <i>CG5359</i>      | 33                  | 51                    | 9                  | Moderate          | Moderate                                                   | Low                                      |
| <i>UBXN7</i>      | <i>CG8892</i>      | 28                  | 43                    | 13                 | High              | Moderate                                                   | Moderate                                 |
| <i>WDR53</i>      | <i>CG5543</i>      | 21                  | 34                    | NA                 | NA                | Low                                                        | Moderate                                 |
| <i>ZDHHC19</i>    | <i>app</i>         | 34                  | 49                    | 3                  | Moderate          | NA                                                         | Low                                      |
|                   |                    |                     |                       |                    |                   |                                                            |                                          |
| <i>CEP19</i>      | None               |                     |                       |                    |                   |                                                            |                                          |
| <i>LRRC33</i>     | None               |                     |                       |                    |                   |                                                            |                                          |
| <i>RNF68</i>      | None               |                     |                       |                    |                   |                                                            |                                          |
| <i>SMCO1</i>      | None               |                     |                       |                    |                   |                                                            |                                          |
| <i>TFRC</i>       | None               |                     |                       |                    |                   |                                                            |                                          |
| <i>TM4SF19</i>    | None               |                     |                       |                    |                   |                                                            |                                          |

**Figure 1--Figure Supplement 2**

| RNAi line                         | Forward and reverse primers                                           | RNAi knockdown (% expression) |
|-----------------------------------|-----------------------------------------------------------------------|-------------------------------|
| <i>app</i> <sup>KK108227</sup>    | For-5'- GCGATCAGACAACCAACGAG-3'<br>Rev-5'- CGCCTTTGGAGGAGAAGGAT-3'    | 55.457                        |
| <i>Cbp20</i> <sup>KK109448</sup>  | For-5'- TTGTGAATGGCACTCGCTTG-3'<br>Rev-5'- GTCCAGTCCACACGAATCA-3'     | 43.900                        |
| <i>CG5359</i> <sup>KK107839</sup> | For-5'- ACGTTATGGCCGAGAACTCA-3'<br>Rev-5'-TGGCGACGTCTTGTTCATAG-3'     | 20.945                        |
| <i>CG5543</i> <sup>KK109031</sup> | For-5'- AAATCCACTTAGCGTGGGGC-3'<br>Rev-5'- AGGAAATTTTACCGCGTTGCAT-3'  | 49.764                        |
| <i>CG6836</i> <sup>KK112485</sup> | For-5'- CCCTTCATCGTCTGCTCCAT-3'<br>Rev-5'- GTGATTTGGAGGGACCAAGC-3'    | 49.087                        |
| <i>CG8888</i> <sup>GD3777</sup>   | For-5'- TTCGCAAGAGCTTGGACCTC-3'<br>Rev-5'- TTTGTGTTAGCCGAGCGGAA-3'    | 25.005                        |
| <i>CG8892</i> <sup>GD14061</sup>  | For-5'- TCCAGAGCAACGTTCATGTCC-3'<br>Rev-5'- TGGACCGTCTGTAAAGTGCC-3'   | 38.721                        |
| <i>dlg1</i> <sup>GD4689</sup>     | For-5'- ACACAAGACGATGCCAATGC-3'<br>Rev-5'- TCCACCCTGTAGATAATCTCGC-3'  | 62.691                        |
| <i>Fsn</i> <sup>GD11383</sup>     | For-5'- CCCATTTGGTTGGTGTGGGA-3'<br>Rev-5'- TGGATTTACCCGTTCTGTTGA-3'   | 55.230                        |
| <i>Pak</i> <sup>KK101874</sup>    | For-5'- GTCGTCACCCGAAACAGTA-3'<br>Rev-5'- GCCCAAAGACCAAAGGTCCA-3'     | 40.212                        |
| <i>Pcyt2</i> <sup>KK110819</sup>  | For-5'- CGCTACGTGGATGAGATCGT-3'<br>Rev-5'- TCCTCATTTAGCGTCCACGG-3'    | 80.642                        |
| <i>PIG-X</i> <sup>KK109717</sup>  | For-5'- TGACCTGCAGCGTTTGAAGA-3'<br>Rev-5'- TGACGAACTTAGGATAGATGGCA-3' | 29.775                        |
| <i>PIG-Z</i> <sup>KK107404</sup>  | For-5'-TCCAGAGCGTGGAGGTAATG-3'<br>Rev-5'- CGTATGCTCCAGCCGAAAGT-3'     | 37.856                        |
| <i>Ulp1</i> <sup>GD7581</sup>     | For-5'-CCTGGCCAAGGGCTAAAAGT-3'<br>Rev-5'- GACATGCGTGTGTTTCGCTAC-3'    | 30.077                        |
| <i>Rp49</i> control               | For-5'-GCAAGCCCAAGGGTATCGA-3'<br>Rev-5'-ACCGATGTTGGGCATCAGA-3'        | --                            |
| <i>tiptop</i>                     | For-5'-CCTCCACAGCATCAGCAACA-3'<br>Rev-5'-CCACCAGGTCGTTACCGTTC-3'      | --                            |



# A Figure 2

## Global phenotype screening

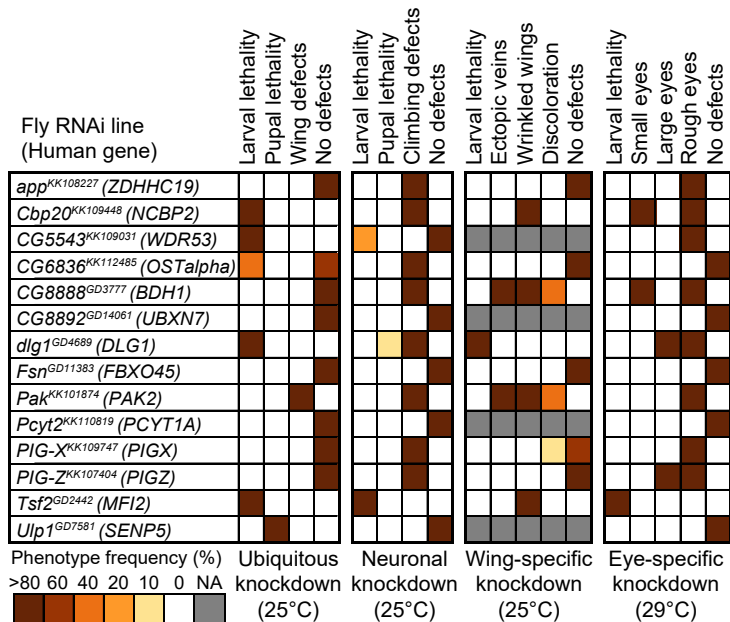

## B

## Climbing ability

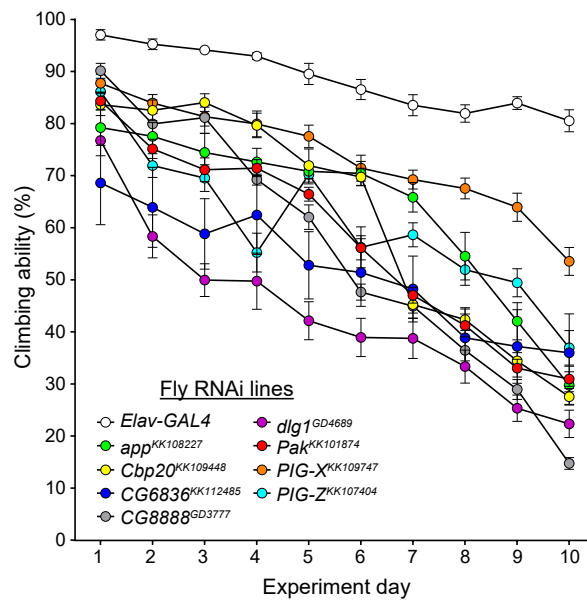

## C

## Rough eye phenotypes

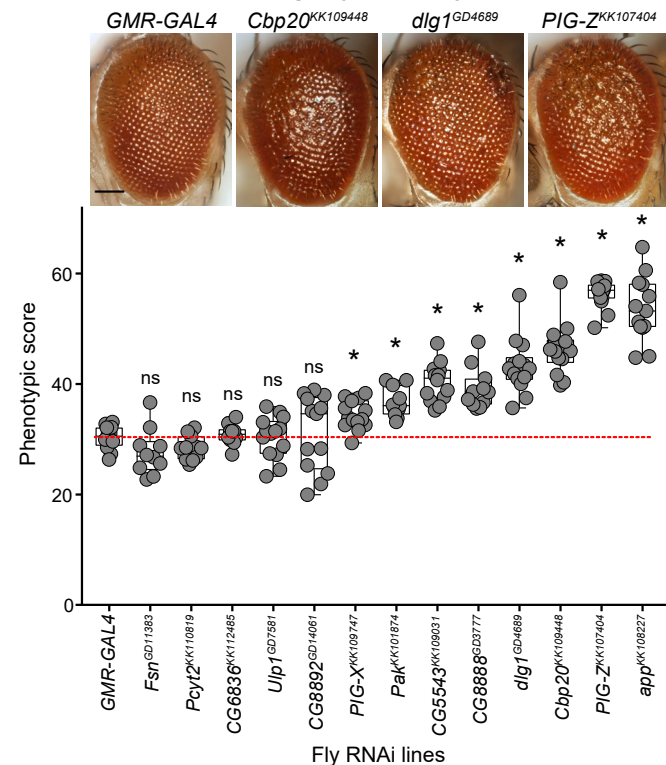

## D

## Adult eye area

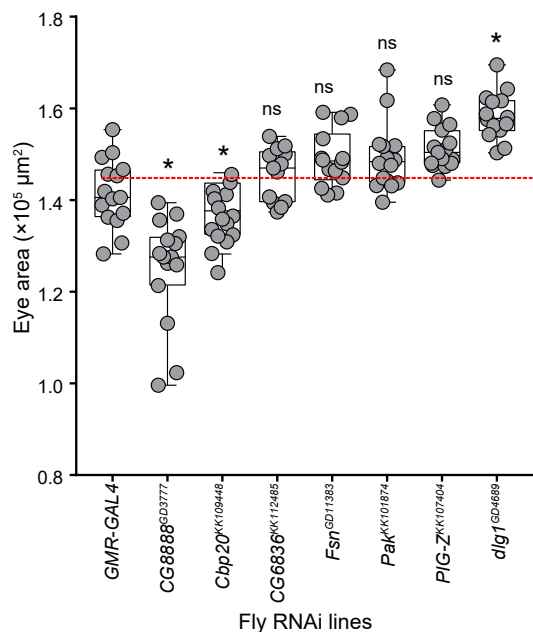

## E

## Cellular phenotypes in the developing eye

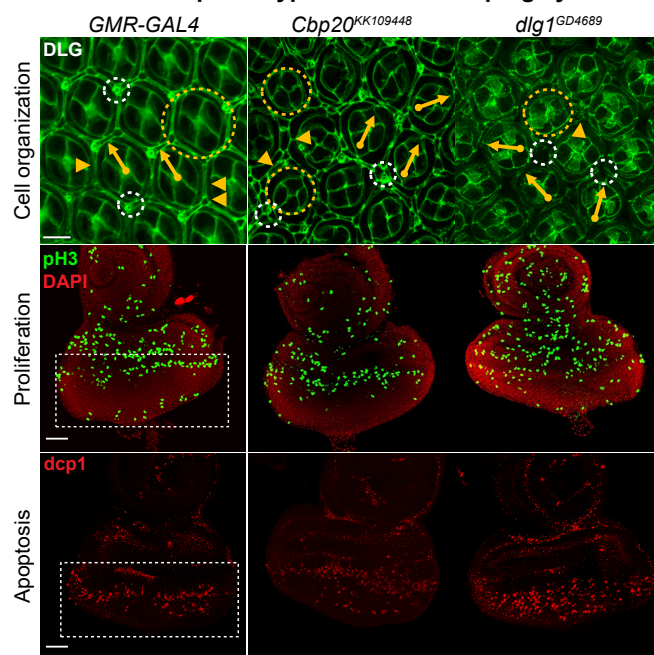

## F

## Cell proliferation defects

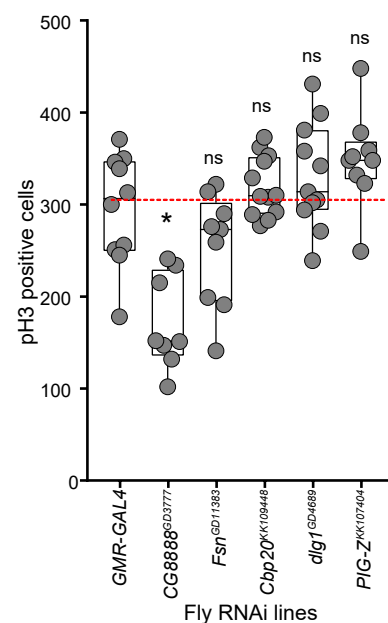

## G

## Apoptosis defects

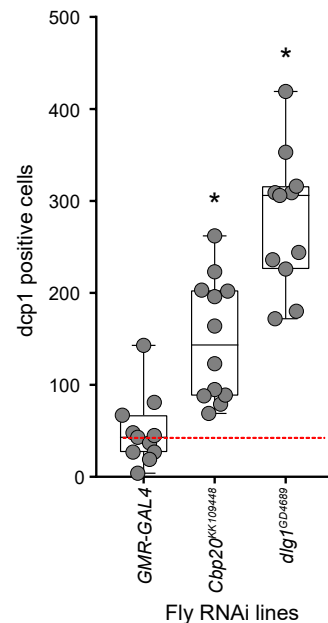

Figure 2--Figure Supplement 1

**A**

Adult wing defects

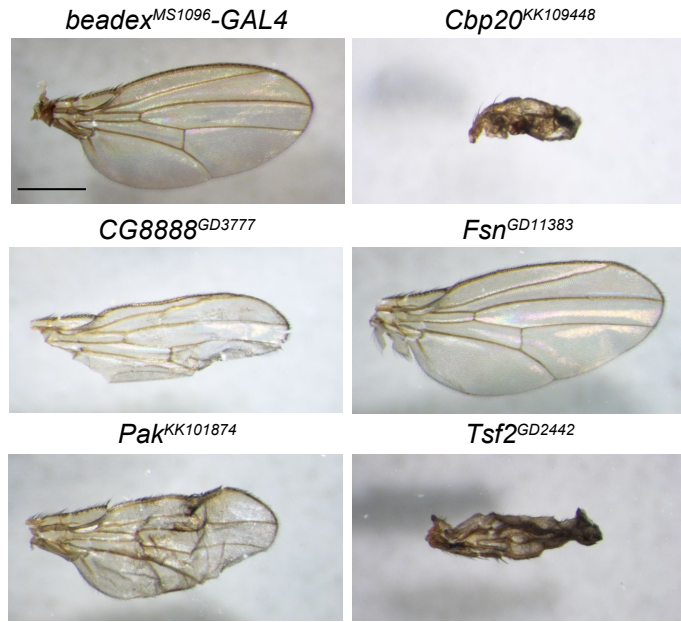

**B**

Survival assay

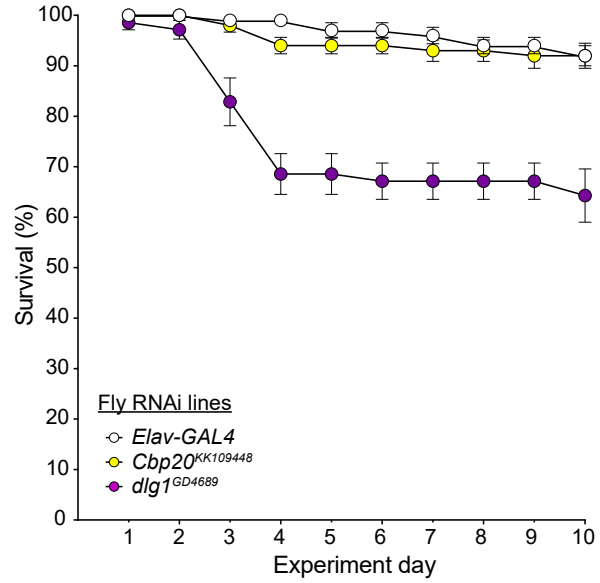

**C**

Axonal targeting defects

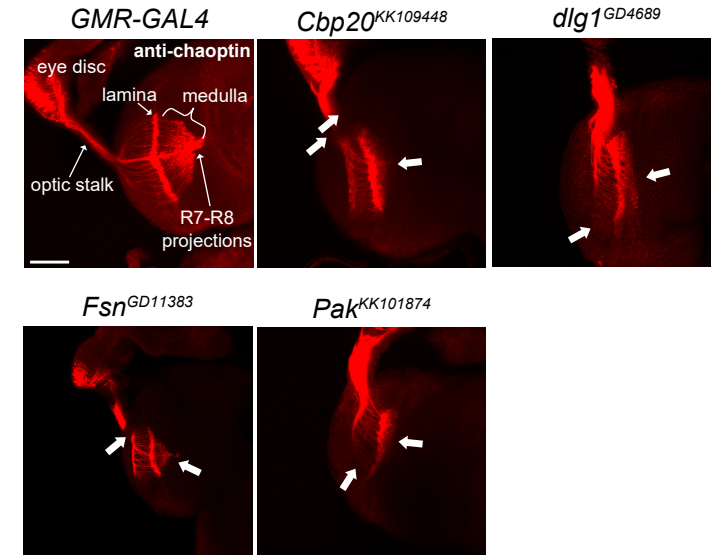



**Figure 2--Figure Supplement 2**

| <b>RNAi line</b>                                                    | <b>Mild axon guidance phenotypes</b> | <b>Moderate axon guidance phenotypes</b> | <b>Severe axon guidance phenotypes</b> |
|---------------------------------------------------------------------|--------------------------------------|------------------------------------------|----------------------------------------|
| <i>Cbp20</i> <sup>KK109448</sup>                                    | 4/9                                  | 3/9                                      | 2/9                                    |
| <i>dlg1</i> <sup>GD4689</sup>                                       | 0/7                                  | 2/7                                      | 5/7                                    |
| <i>Fsn</i> <sup>GD11383</sup>                                       | 7/20                                 | 7/20                                     | 6/20                                   |
| <i>Pak</i> <sup>KK101874</sup>                                      | 2/8                                  | 4/8                                      | 2/8                                    |
| <i>Cbp20</i> <sup>KK109448</sup> /<br><i>dlg1</i> <sup>GD4689</sup> | 2/17                                 | 8/17                                     | 7/17                                   |
| <i>Cbp20</i> <sup>KK109448</sup> /<br><i>Fsn</i> <sup>GD11383</sup> | 1/16                                 | 4/16                                     | 11/16                                  |
| <i>Cbp20</i> <sup>KK109448</sup> /<br>Overexp. <i>Diap1</i>         | 5/11                                 | 6/11                                     | 0/11                                   |
| <i>dlg1</i> <sup>GD4689</sup> /<br>Overexp. <i>Diap1</i>            | 1/17                                 | 8/17                                     | 8/17                                   |

# Figure 2--Figure Supplement 3

**A**

Adult eye morphology

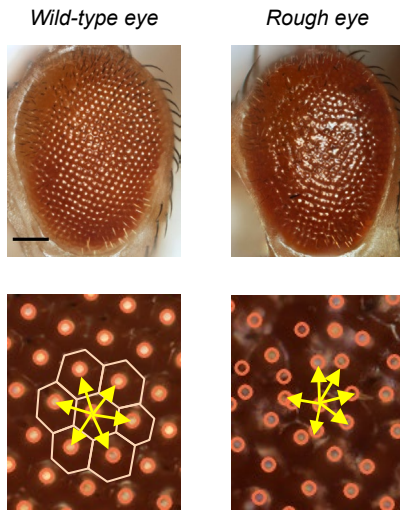

**B**

Cellular organization (pupal eye)

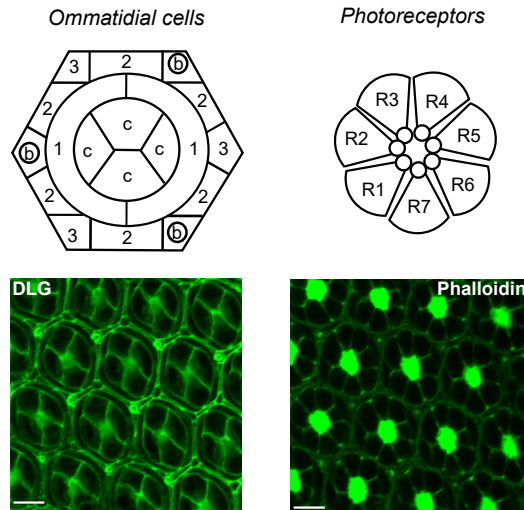

**C**

Cellular mechanisms (larval eye disc)

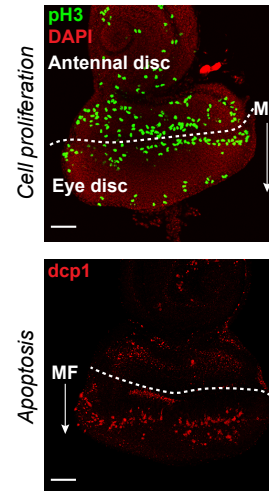

**D**

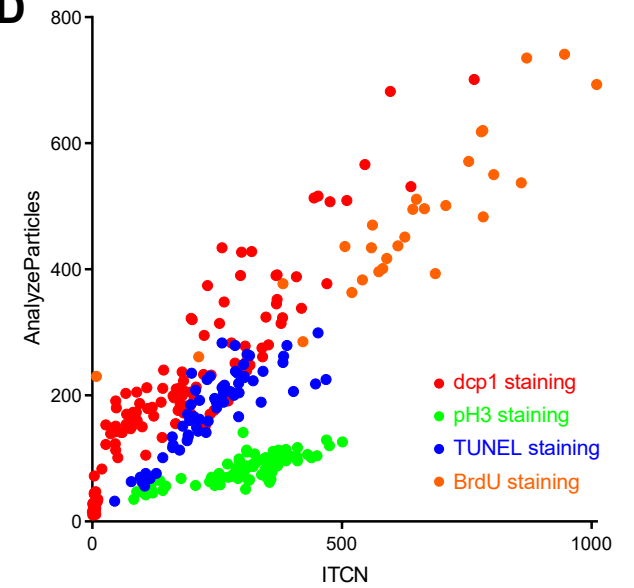

# Figure 2--Figure Supplement 4

## A Adult eyes with *GMR-GAL4*, *UAS-Dicer2* knockdown

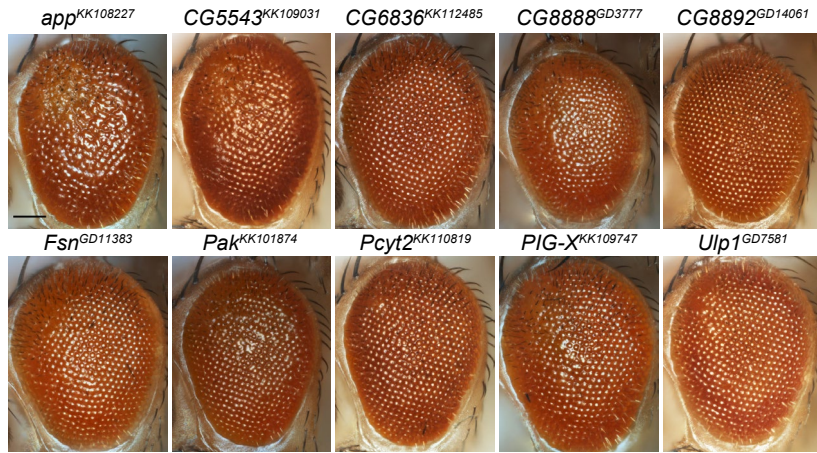

## B Ommatidial diameter

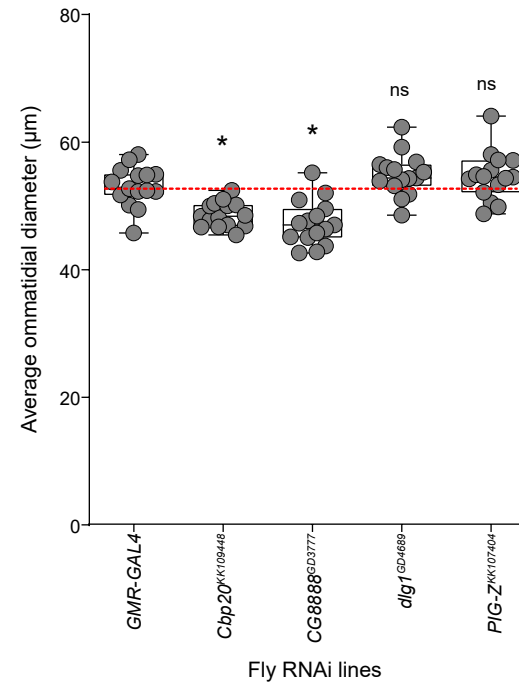

## C Phenotypic scores with *GMR-GAL4* knockdown

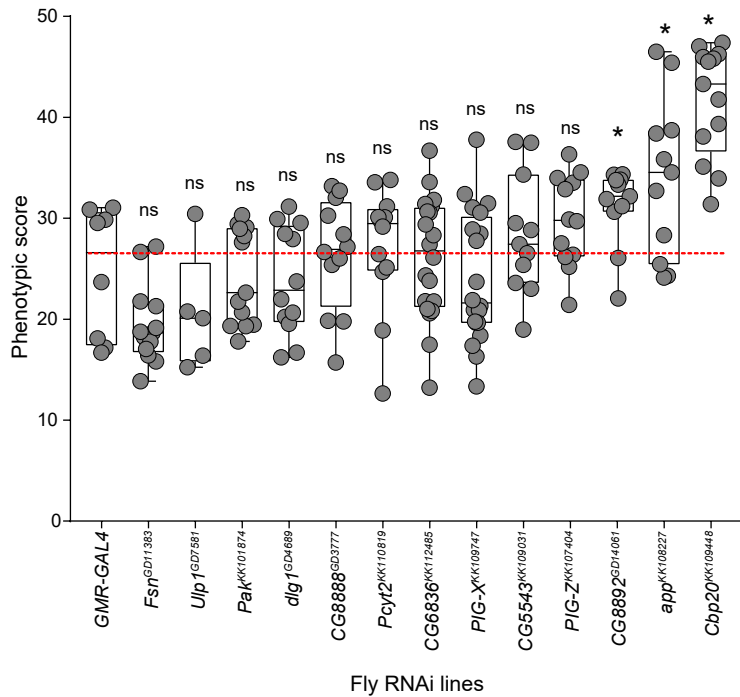

## D Phenotypic scores of validation lines

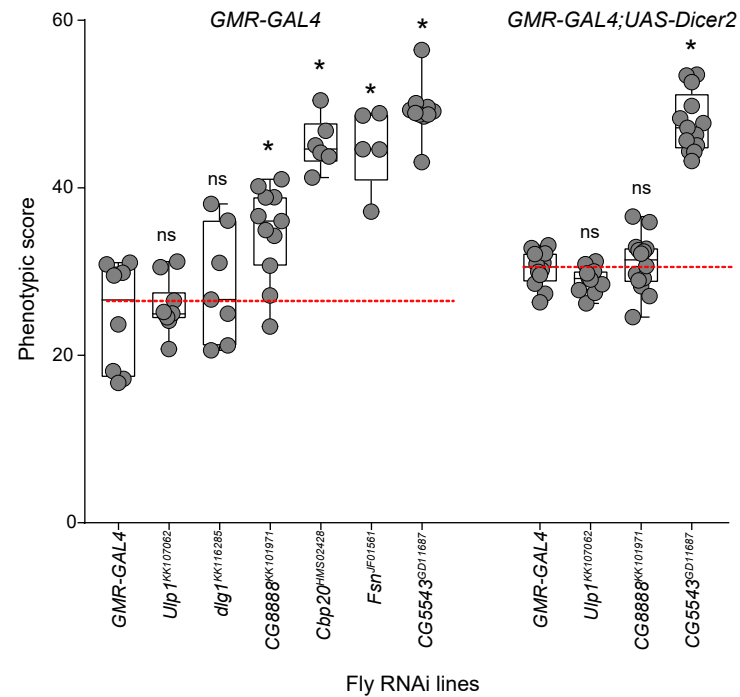

**Figure 2--Figure Supplement 5**

| <b>Fly RNAi line</b>              | <b>Human homolog</b> | <b>CNV region</b> | <b>Avg. Flynotyper score</b> |
|-----------------------------------|----------------------|-------------------|------------------------------|
| <i>Ube3a</i> <sup>KK104898</sup>  | <i>UBE3A</i>         | Core gene         | 59.733                       |
| <i>Pten</i> <sup>GD13500</sup>    | <i>PTEN</i>          | Core gene         | 58.275                       |
| <i>Cadps</i> <sup>GD9502_1</sup>  | <i>CADPS2</i>        | Core gene         | 56.758                       |
| <i>PIG-Z</i> <sup>KK107404</sup>  | <i>PIGZ</i>          | 3q29              | 56.243                       |
| <i>arm</i> <sup>KK102545</sup>    | <i>CTNNB1</i>        | Core gene         | 54.865                       |
| <i>app</i> <sup>KK108227</sup>    | <i>ZDHHC19</i>       | 3q29              | 53.614                       |
| <i>kis</i> <sup>GD16331</sup>     | <i>CHD8</i>          | Core gene         | 51.182                       |
| <i>Nrx-1</i> <sup>GD2619</sup>    | <i>NRXN1</i>         | Core gene         | 48.753                       |
| <i>Prosap</i> <sup>GD10101</sup>  | <i>SHANK3</i>        | Core gene         | 48.748                       |
| <i>Cbp20</i> <sup>KK109448</sup>  | <i>NCBP2</i>         | 3q29              | 46.268                       |
| <i>dlg1</i> <sup>GD4689</sup>     | <i>DLG1</i>          | 3q29              | 43.219                       |
| <i>CG5543</i> <sup>KK109031</sup> | <i>WDR53</i>         | 3q29              | 40.349                       |
| <i>CG8888</i> <sup>GD3777</sup>   | <i>BDH1</i>          | 3q29              | 39.126                       |
| <i>rk</i> <sup>GD14383_1</sup>    | <i>LGR5</i>          | Core gene         | 38.021                       |
| <i>MCPH1</i> <sup>GD12537_2</sup> | <i>MCPH1</i>         | Core gene         | 36.835                       |
| <i>Pak</i> <sup>KK101874</sup>    | <i>PAK2</i>          | 3q29              | 36.691                       |
| <i>para</i> <sup>GD3392_1</sup>   | <i>SCN1A</i>         | Core gene         | 35.846                       |
| <i>PIG-X</i> <sup>KK109717</sup>  | <i>PIGX</i>          | 3q29              | 34.392                       |
| <i>Eph</i> <sup>GD39</sup>        | <i>EPHA6</i>         | Core gene         | 31.468                       |
| <i>CG8892</i> <sup>GD14061</sup>  | <i>UBXN7</i>         | 3q29              | 31.179                       |
| <i>CG6836</i> <sup>KK112485</sup> | <i>OSTalpha</i>      | 3q29              | 30.842                       |
| <i>Ulp1</i> <sup>GD7581</sup>     | <i>SEN5</i>          | 3q29              | 30.383                       |
| <i>Pcyt2</i> <sup>KK110819</sup>  | <i>PCYT1A</i>        | 3q29              | 28.423                       |
| <i>Fsn</i> <sup>GD11383</sup>     | <i>FBXO45</i>        | 3q29              | 27.671                       |

# Figure 2--Figure Supplement 6

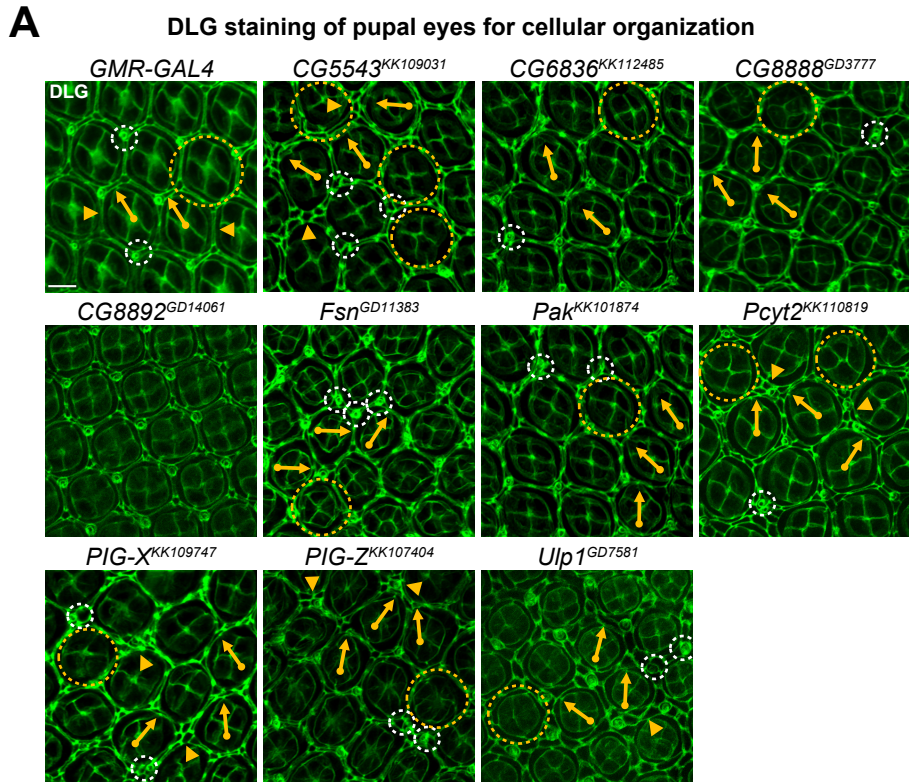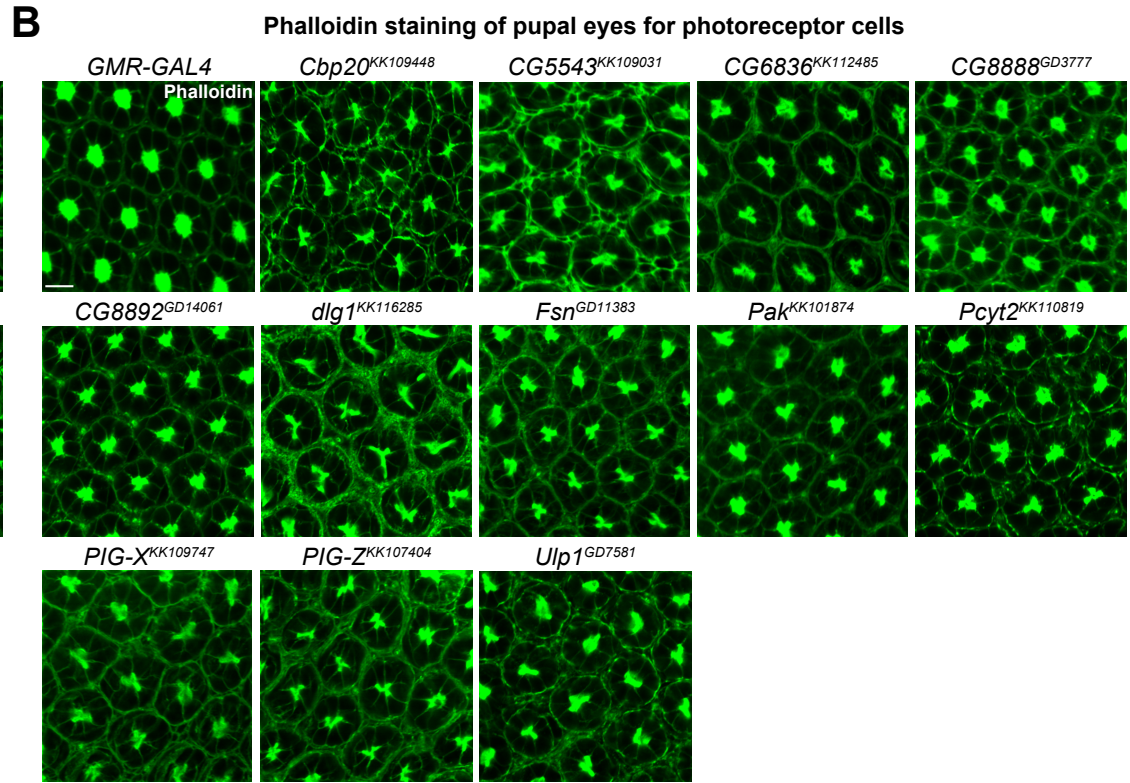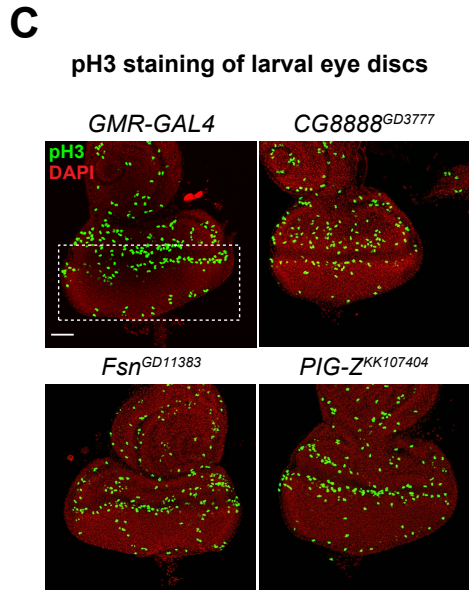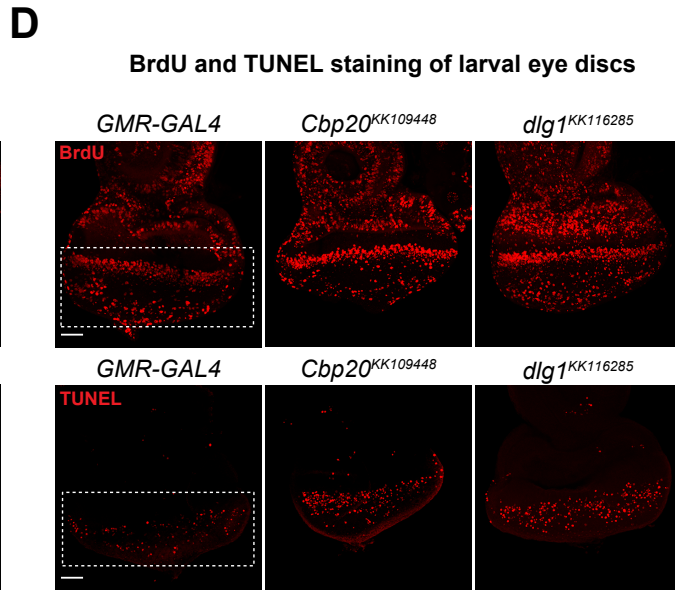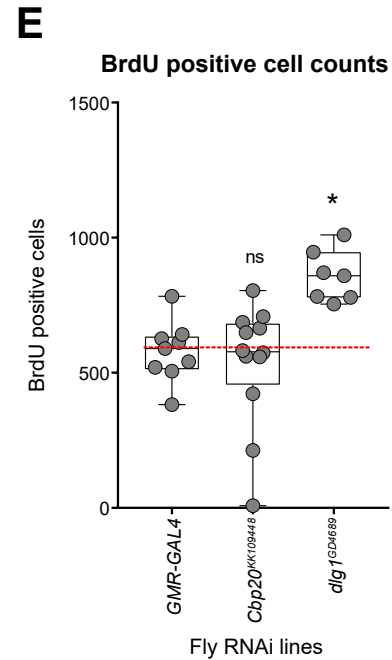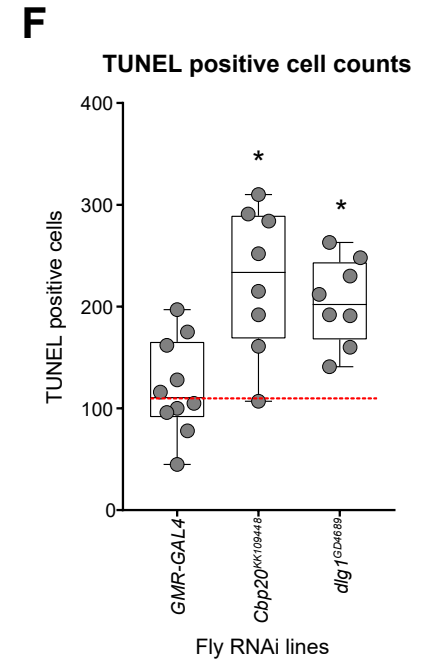

**Figure 2--Figure Supplement 7**

| RNAi line                         | Cone cell defect | Primary cell defect | Secondary cell defect | Bristle group defect | Rotation error | Hexagonal defect | Photoreceptor defect |
|-----------------------------------|------------------|---------------------|-----------------------|----------------------|----------------|------------------|----------------------|
| <i>GMR-GAL4</i>                   |                  |                     |                       |                      |                |                  |                      |
| <i>Cbp20</i> <sup>KK109448</sup>  | ++               | +                   | ++                    | ++                   | ++             | ++               | +++                  |
| <i>CG5543</i> <sup>KK109031</sup> | ++               | ++                  | ++                    | +++                  | ++             | +                | +                    |
| <i>CG6836</i> <sup>KK112485</sup> | +                |                     |                       | +                    | +              |                  | +                    |
| <i>CG8888</i> <sup>GD3777</sup>   | ++               |                     |                       | +                    | ++             |                  | ++                   |
| <i>CG8892</i> <sup>GD14061</sup>  |                  |                     |                       |                      |                |                  | +                    |
| <i>dlg1</i> <sup>GD4689</sup>     | ++               |                     | +                     | +++                  | +              | ++               | +++                  |
| <i>Fsn</i> <sup>GD11383</sup>     | ++               | +                   |                       | ++                   | ++             | +                |                      |
| <i>Pak</i> <sup>KK101874</sup>    | +                |                     |                       | +                    | +              | +                |                      |
| <i>Pcyt2</i> <sup>KK110819</sup>  | +                | ++                  | ++                    | ++                   | ++             | +                | +                    |
| <i>PIG-X</i> <sup>KK109717</sup>  | +                |                     | +                     | ++                   | ++             |                  | +                    |
| <i>PIG-Z</i> <sup>KK107404</sup>  | +                |                     | +                     | ++                   | +              | +                | ++                   |
| <i>Ulp1</i> <sup>GD7581</sup>     | +                | ++                  | ++                    | +                    | ++             | +                | +                    |



# Figure 2--Figure Supplement 8

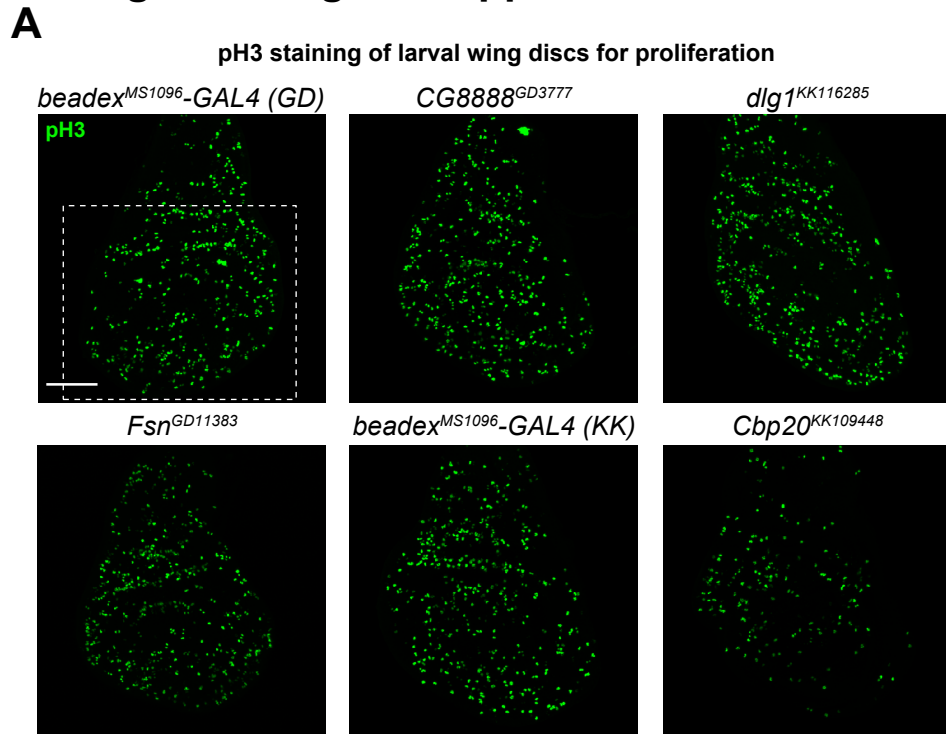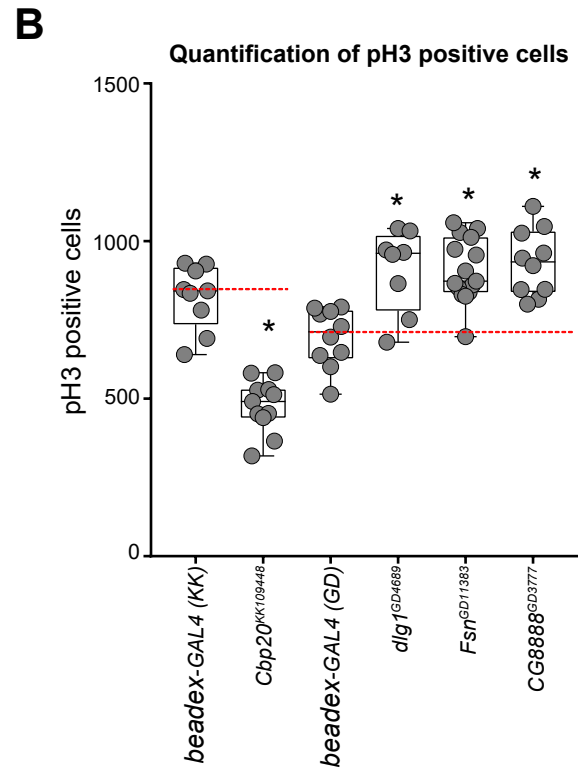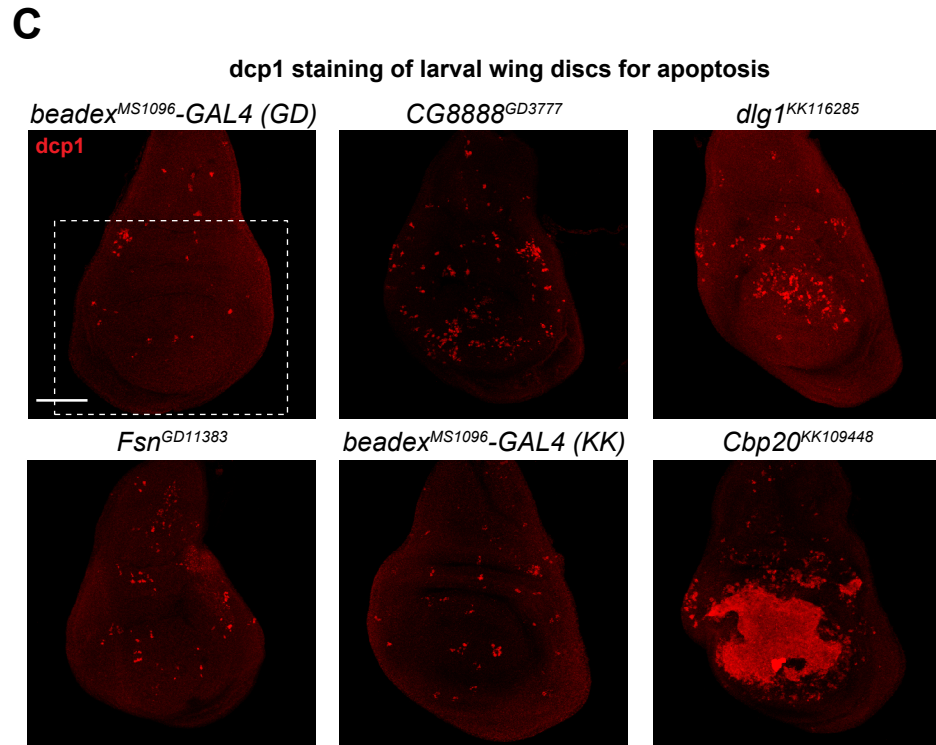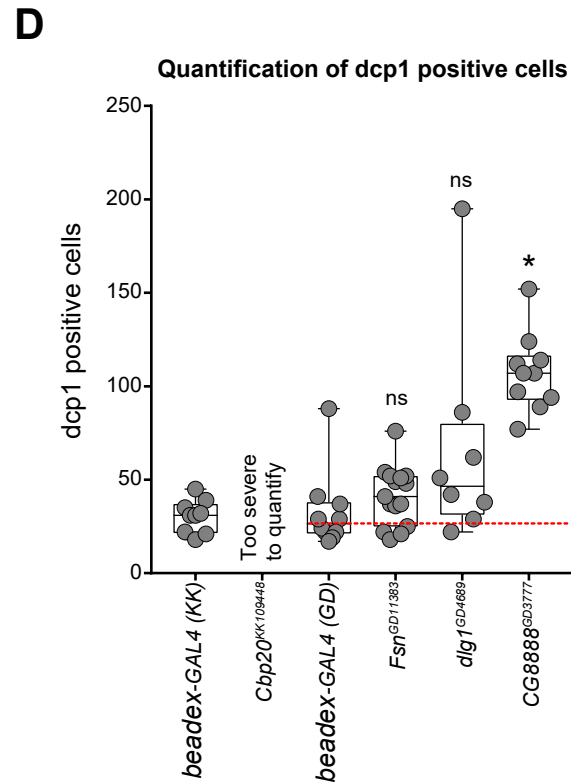

# Figure 2--Figure Supplement 9

**A**

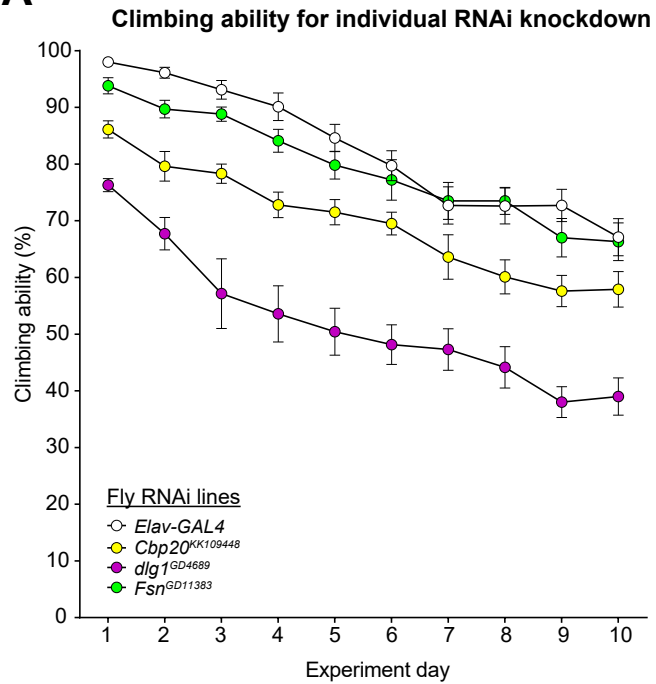

**B**

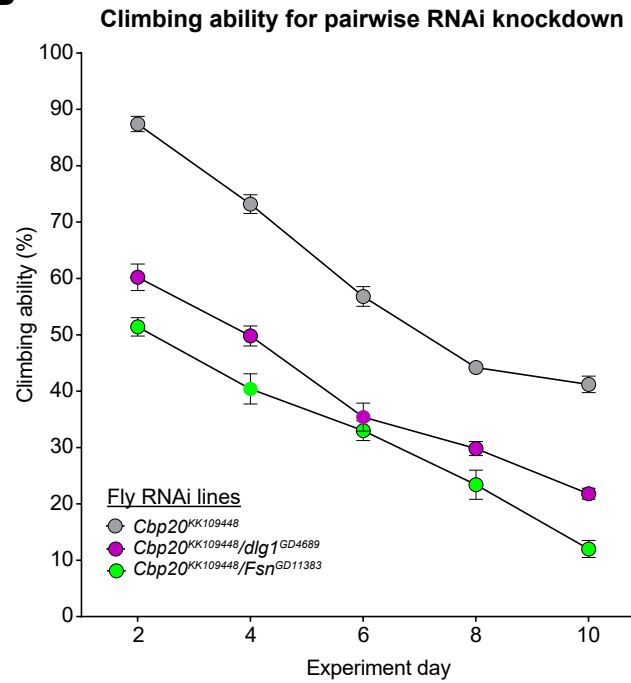

**C**

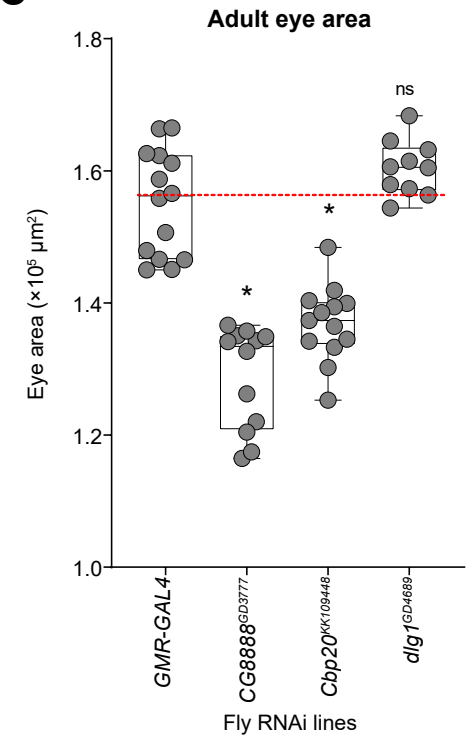

**D**

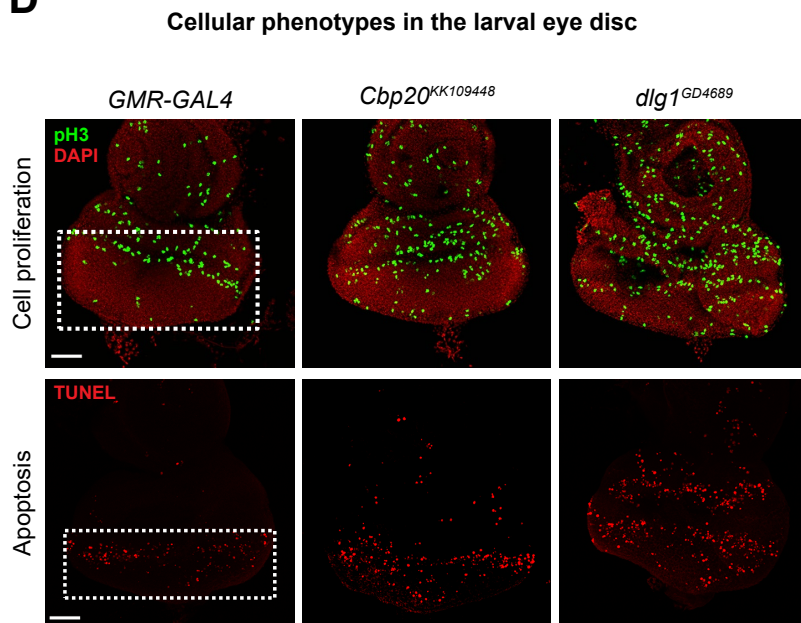

**E**

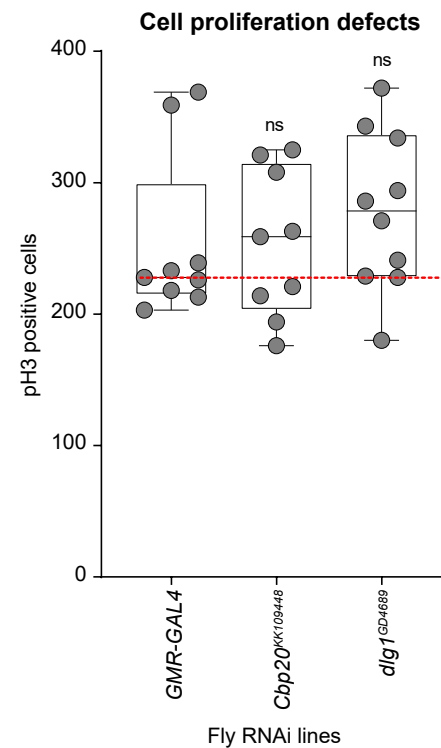

**F**

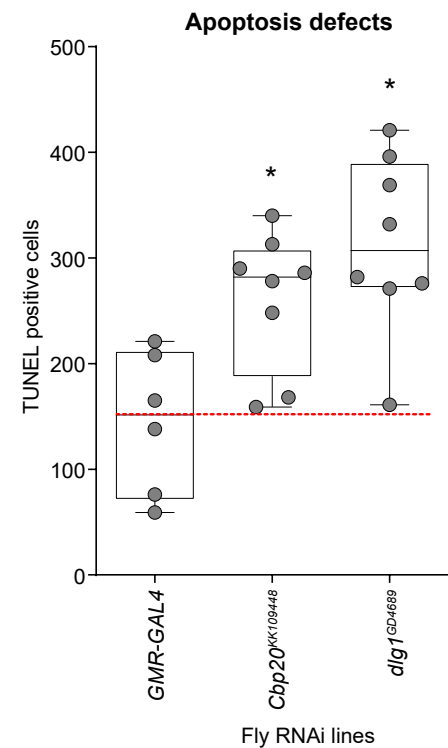

# Figure 3

## A

Pairwise interactions for homologs of 3q29 genes

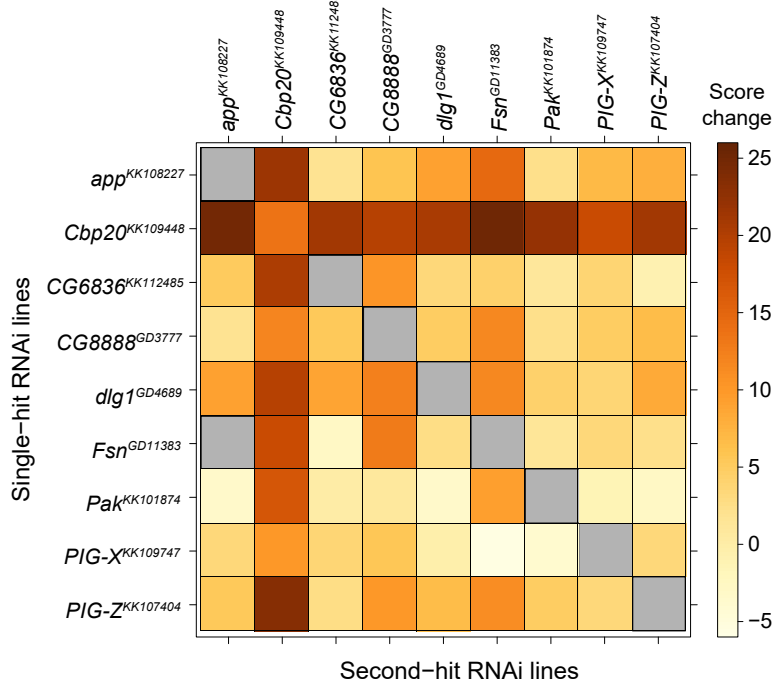

## B

Pairwise interactions of *Cbp20* (*NCBP2*)

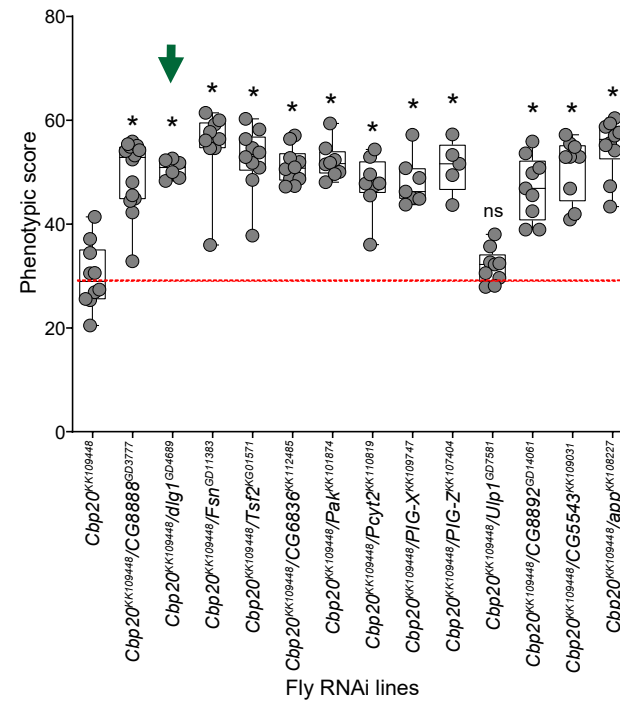

## C

Pairwise interactions of *dlg1* (*DLG1*)

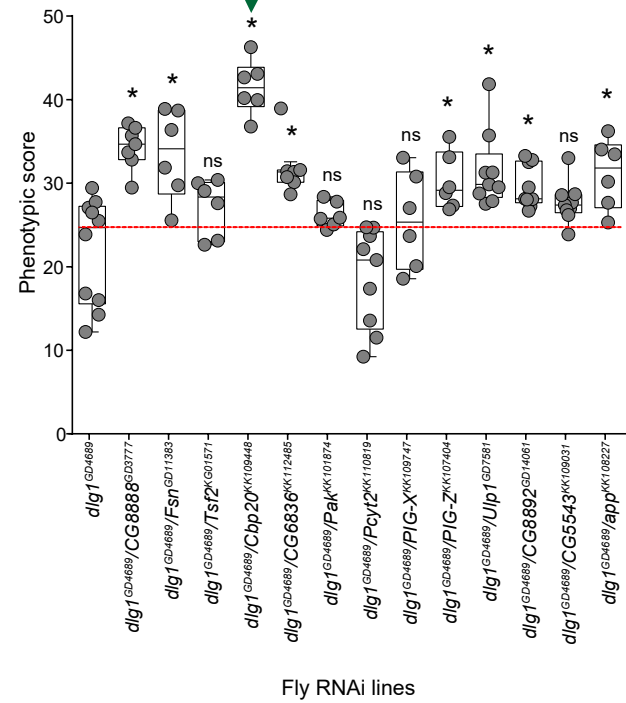

## D

Rough eye phenotypes of pairwise interactions

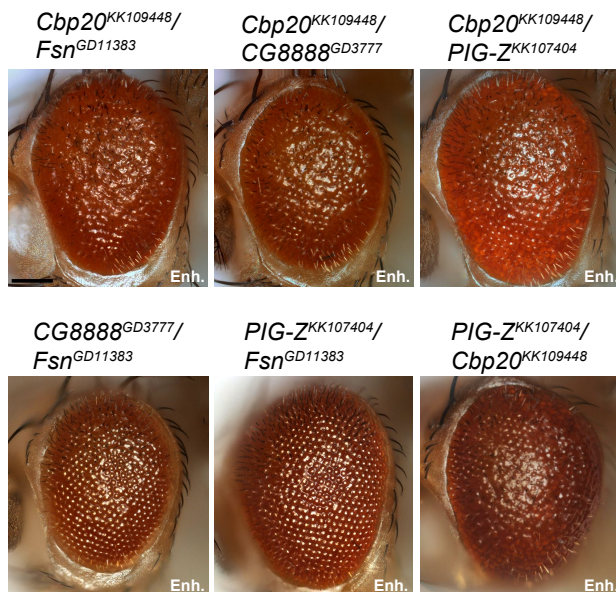

## E

Axon targeting defects

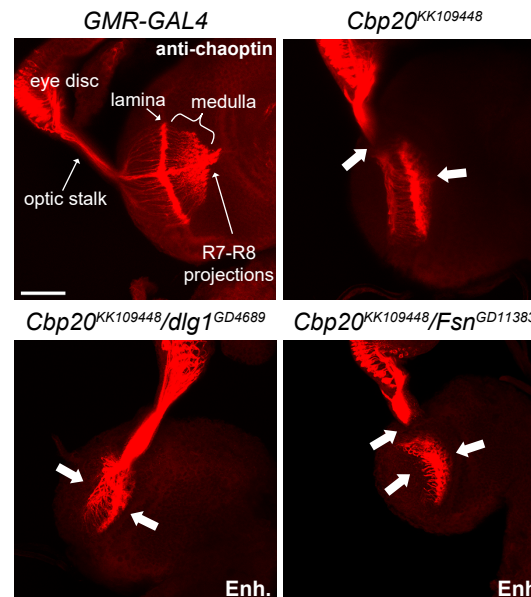

## F

Climbing ability

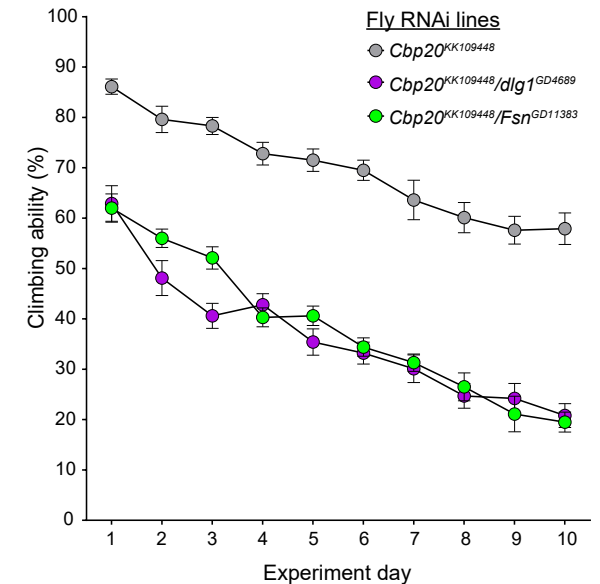

### Figure 3--Figure Supplement 1

| Second-hit gene                | <i>app</i> <sup>KK108227</sup> | <i>Cbp20</i> <sup>KK109448</sup> | <i>CG6836</i> <sup>KK112485</sup> | <i>CG8888</i> <sup>GD3777</sup> | <i>dlg1</i> <sup>GD4689</sup> | <i>Fsn</i> <sup>GD11383</sup> | <i>Pak</i> <sup>KK101874</sup> | <i>PIG-X</i> <sup>KK109717</sup> | <i>PIG-Z</i> <sup>KK107404</sup> |
|--------------------------------|--------------------------------|----------------------------------|-----------------------------------|---------------------------------|-------------------------------|-------------------------------|--------------------------------|----------------------------------|----------------------------------|
| <i>app</i>                     | NA                             | Enhancer (1/1)                   | No interaction (0/1)              | No interaction (0/1)            | Enhancer (1/1)                | NA                            | No interaction (0/1)           | No interaction (0/1)             | No interaction (0/1)             |
| <i>Cbp20</i>                   | Enhancer (1/1)                 | Enhancer (3/3)                   | Enhancer (1/1)                    | Enhancer (3/3)                  | Enhancer (2/2)                | Enhancer (2/3)                | Enhancer (3/3)                 | No interaction (0/1)             | Enhancer (3/3)                   |
| <i>CG6836</i>                  | No interaction (0/1)           | Enhancer (1/1)                   | NA                                | Enhancer (1/1)                  | Enhancer (1/1)                | No interaction (0/1)          | No interaction (0/1)           | No interaction (0/1)             | No interaction (0/1)             |
| <i>CG8888</i>                  | No interaction (0/1)           | Enhancer (3/3)                   | Enhancer (1/1)                    | Not validated (1/2)             | Not validated (1/3)           | Enhancer (2/3)                | No interaction (0/3)           | No interaction (0/1)             | Enhancer (3/3)                   |
| <i>dlg1</i>                    | Enhancer (1/1)                 | Enhancer (4/4)                   | No interaction (0/1)              | Not validated (1/2)             | Enhancer (1/1)                | Not validated (1/2)           | Not validated (1/2)            | No interaction (0/1)             | Enhancer (3/3)                   |
| <i>Fsn</i>                     | Enhancer (1/1)                 | Enhancer (3/3)                   | No interaction (0/1)              | Not validated (1/3)             | Not validated (1/3)           | No interaction (0/2)          | No interaction (0/2)           | No interaction (0/1)             | Enhancer (2/3)                   |
| <i>Pak</i>                     | No interaction (0/1)           | Enhancer (3/3)                   | No interaction (0/1)              | Not validated (1/3)             | Not validated (1/3)           | No interaction (0/1)          | No interaction (0/1)           | No interaction (0/1)             | Enhancer (2/3)                   |
| <i>PIG-X</i>                   | No interaction (0/1)           | Enhancer (1/1)                   | No interaction (0/1)              | No interaction (0/1)            | No interaction (0/1)          | No interaction (0/1)          | No interaction (0/1)           | NA                               | No interaction (0/1)             |
| <i>PIG-Z</i>                   | No interaction (0/1)           | Enhancer (2/2)                   | No interaction (0/1)              | Enhancer (2/2)                  | Not validated (1/2)           | Not validated (1/2)           | No interaction (0/2)           | No interaction (0/1)             | Enhancer (1/1)                   |
| <i>CG5543</i>                  | NA                             | Enhancer (2/2)                   | NA                                | Enhancer (2/2)                  | Not validated (1/2)           | NA                            | Not validated (1/2)            | NA                               | NA                               |
| <i>CG8892</i>                  | NA                             | Enhancer (1/1)                   | NA                                | No interaction (0/1)            | Enhancer (1/1)                | NA                            | No interaction (0/1)           | NA                               | NA                               |
| <i>Pcyt2</i>                   | NA                             | Enhancer (1/1)                   | NA                                | Enhancer (1/1)                  | No interaction (0/1)          | NA                            | Enhancer (1/1)                 | NA                               | Enhancer (1/1)                   |
| <i>Tsf2</i>                    | NA                             | Enhancer (1/1)                   | NA                                | Enhancer (1/1)                  | No interaction (0/1)          | No interaction (0/1)          | Enhancer (1/1)                 | NA                               | Enhancer (1/1)                   |
| <i>Ulp1</i>                    | NA                             | No interaction (0/2)             | NA                                | Not validated (1/2)             | Not validated (1/2)           | NA                            | Not validated (1/2)            | NA                               | NA                               |
|                                |                                |                                  |                                   |                                 |                               |                               |                                |                                  |                                  |
| Lines tested (161 total)       | 8                              | 28                               | 8                                 | 25                              | 24                            | 16                            | 23                             | 8                                | 21                               |
| All interactions (54/94 total) | 3/8                            | 12/13                            | 2/8                               | 10/13                           | 10/13                         | 4/8                           | 6/13                           | 0/8                              | 7/10                             |
| Validated (39/94 total)        | 3/8                            | 12/13                            | 2/8                               | 6/13                            | 4/13                          | 2/8                           | 3/13                           | 0/8                              | 7/10                             |
| Reciprocal cross (19/26 total) | 2/2                            | 7/8                              | 2/2                               | 3/3                             | 1/3                           | 1/2                           | 1/1                            | 0/0                              | 2/5                              |

# Figure 3--Figure Supplement 2

**A**

Pairwise interactions for homologs of 3q29 genes

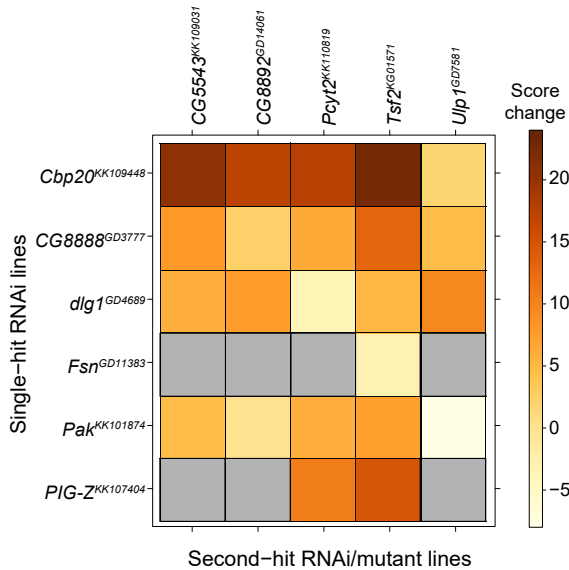

**B**

Pairwise interactions of *app*<sup>KK108227</sup> (*ZDHHC19*)

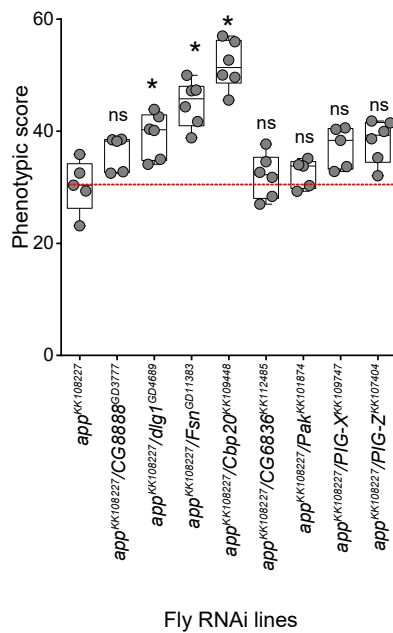

**C**

Pairwise interactions of *CG6836*<sup>KK112485</sup> (*OSTalpha*)

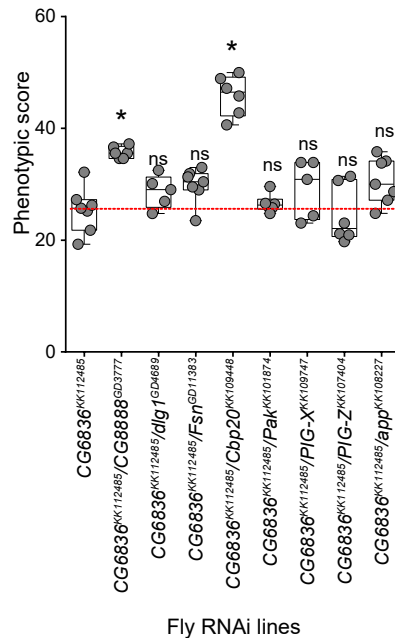

**D**

Pairwise interactions of *CG8888*<sup>GD3777</sup> (*BDH1*)

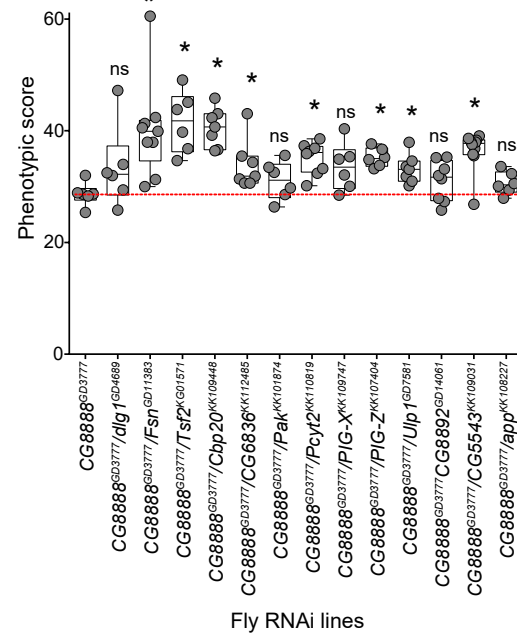

**E**

Pairwise interactions of *Fsn*<sup>GD11383</sup> (*FBXO45*)

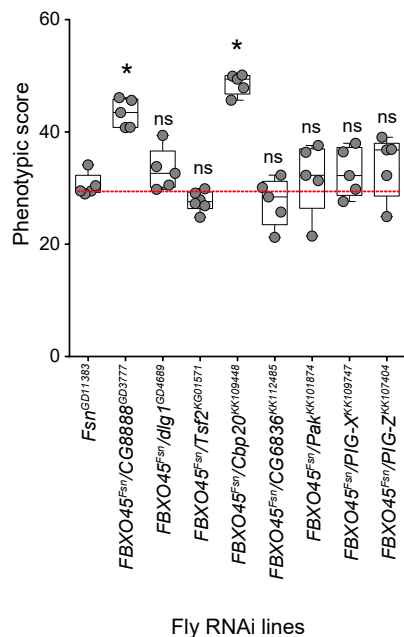

**F**

Pairwise interactions of *Pak*<sup>KK101874</sup> (*PAK2*)

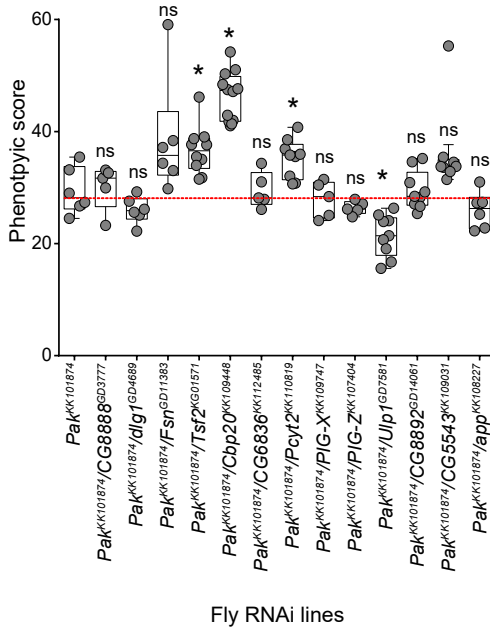

**G**

Pairwise interactions of *PIG-X*<sup>KK109717</sup> (*PIGX*)

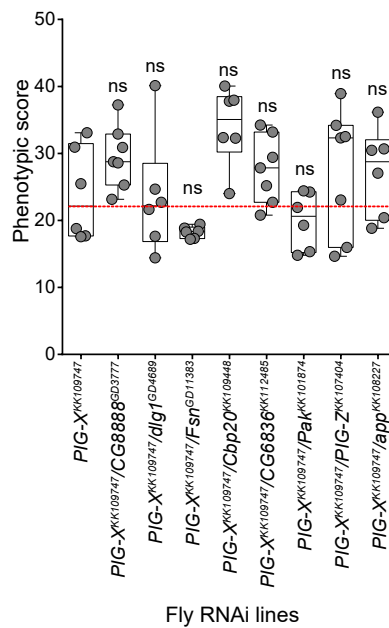

**H**

Pairwise interactions of *PIG-Z*<sup>KK107404</sup> (*PIGZ*)

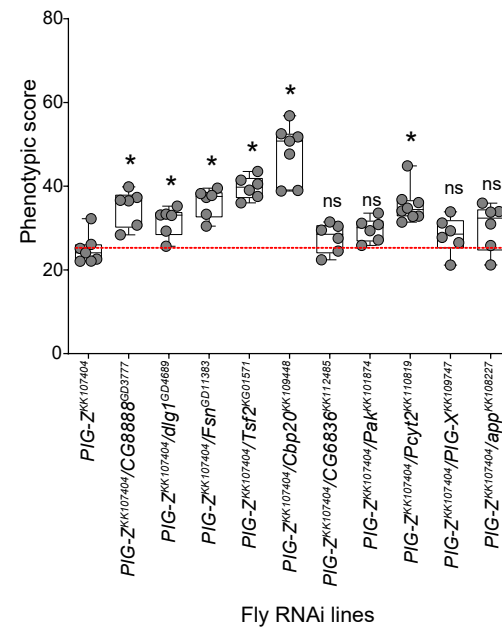

# Figure 3--Figure Supplement 3

**A**
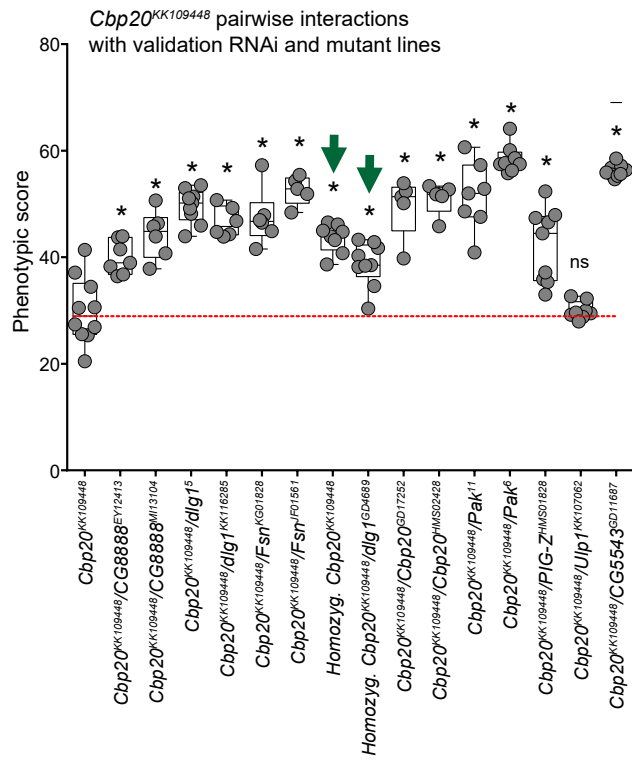
**B**
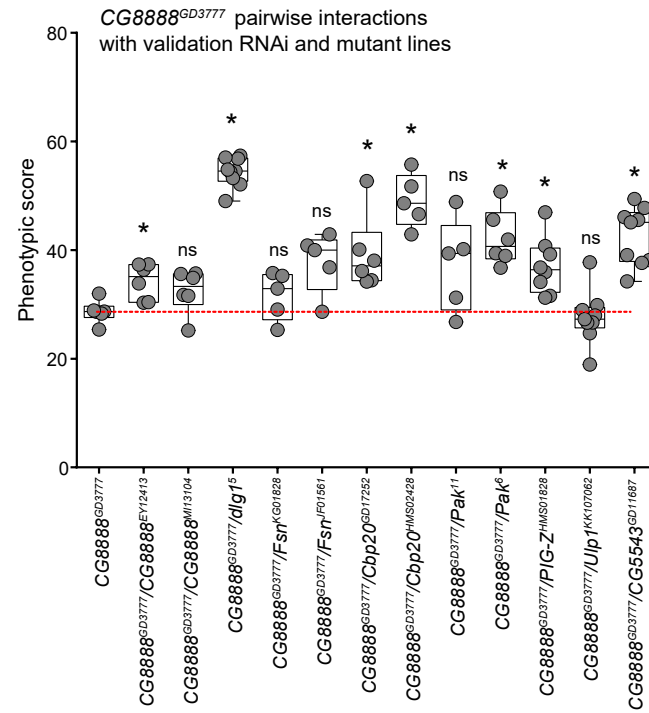
**C**
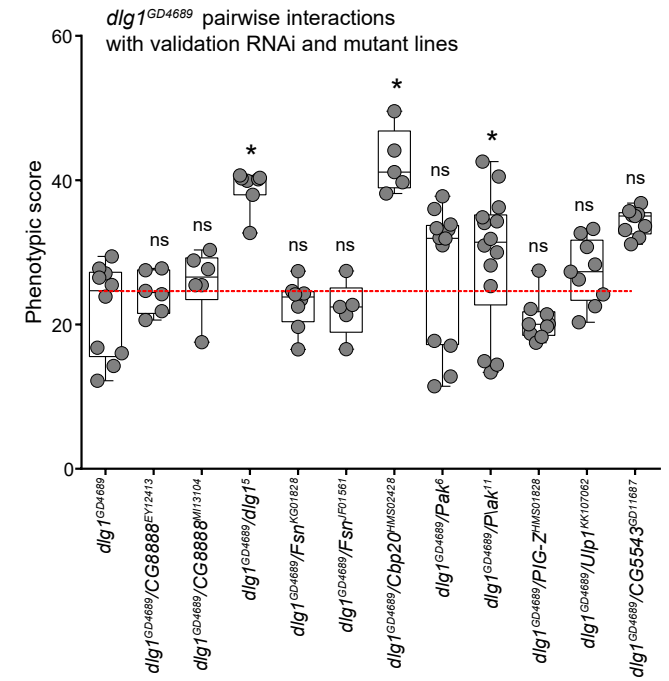
**D**
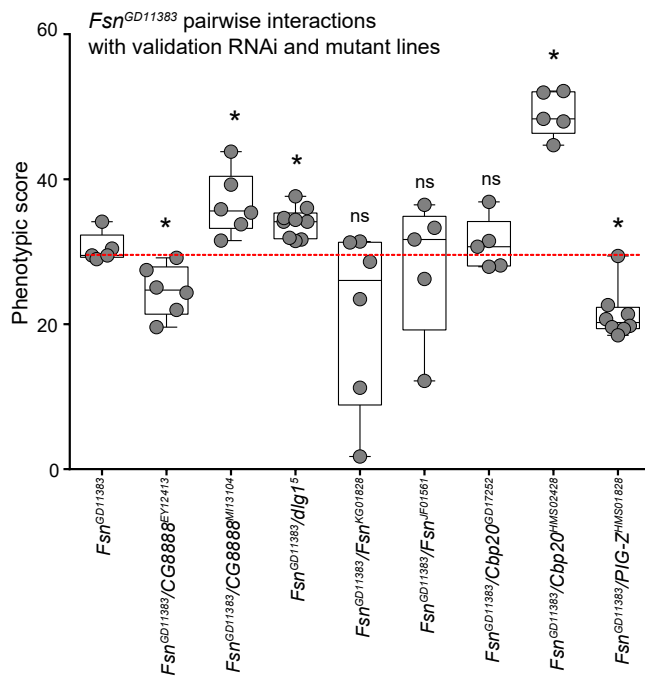
**E**
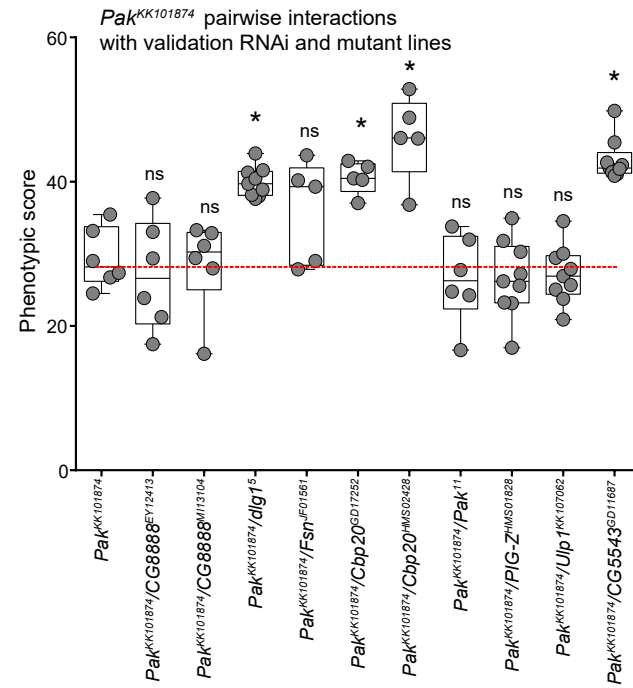
**F**
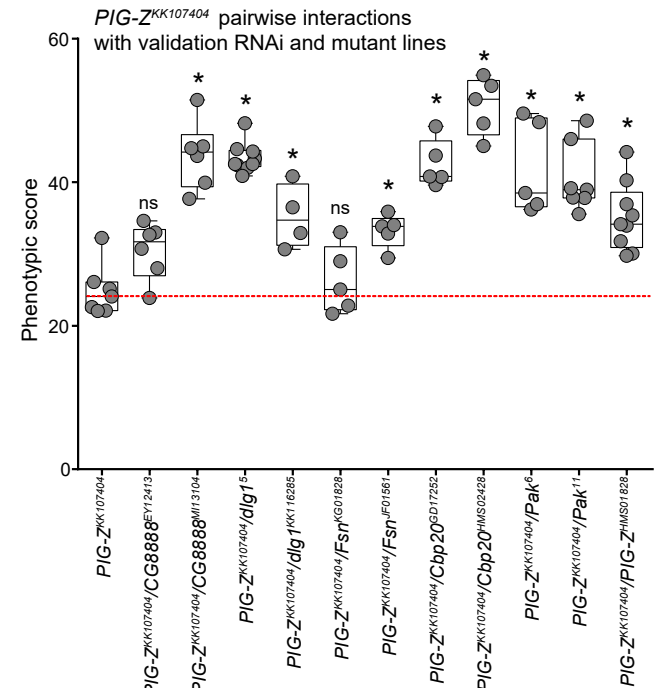



# Figure 3--Figure Supplement 4

**A**

## GO term enrichment in differentially-expressed genes

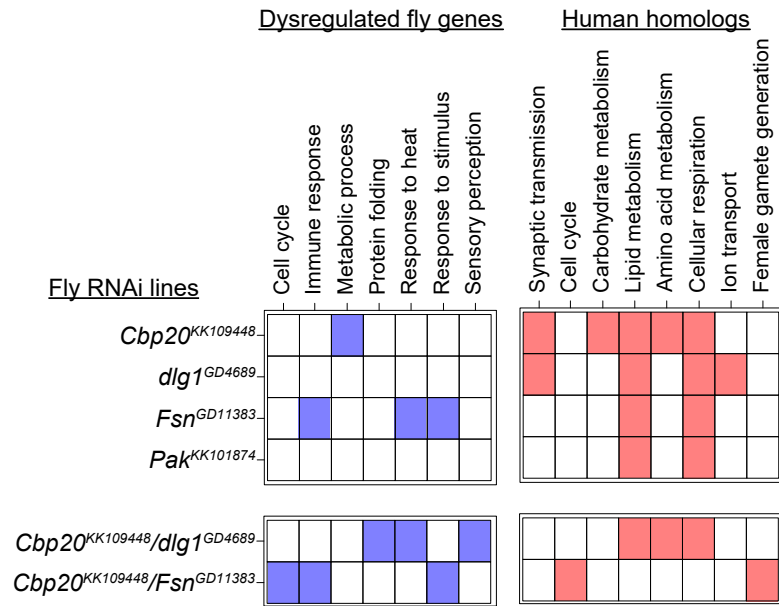

**B**

## GO term enrichment for *Cbp20<sup>KK109448</sup>/Fsn<sup>GD11383</sup>* interaction

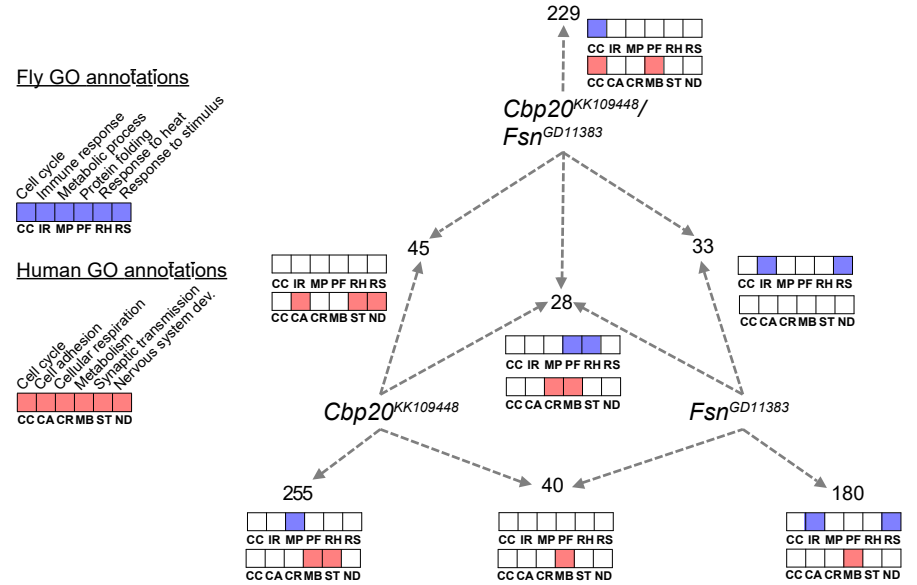

**C**

## Differentially-expressed human apoptosis and cell cycle genes

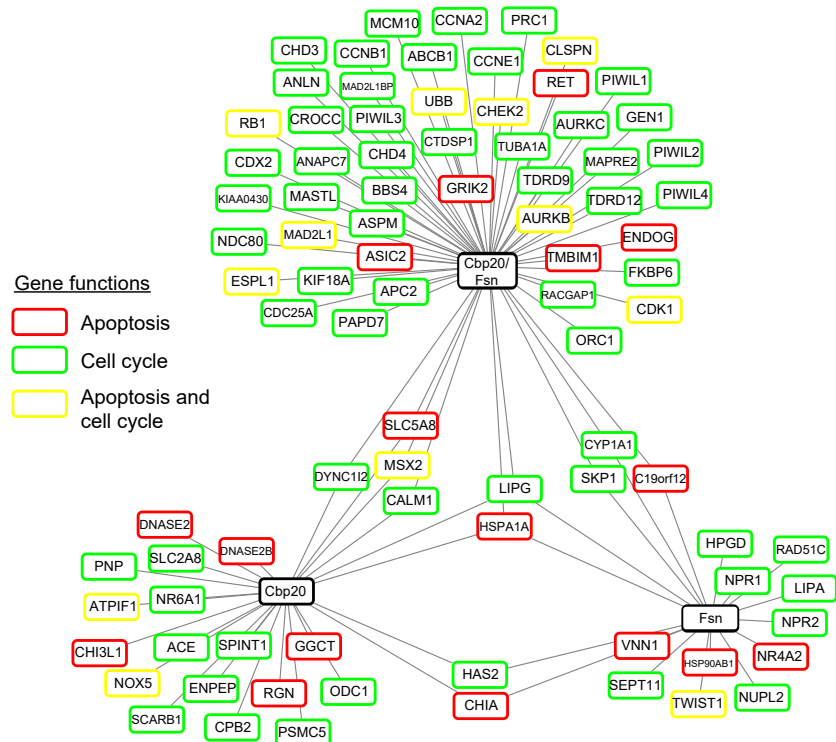

**D**

## Expression of RNA-Seq targets in the developing brain

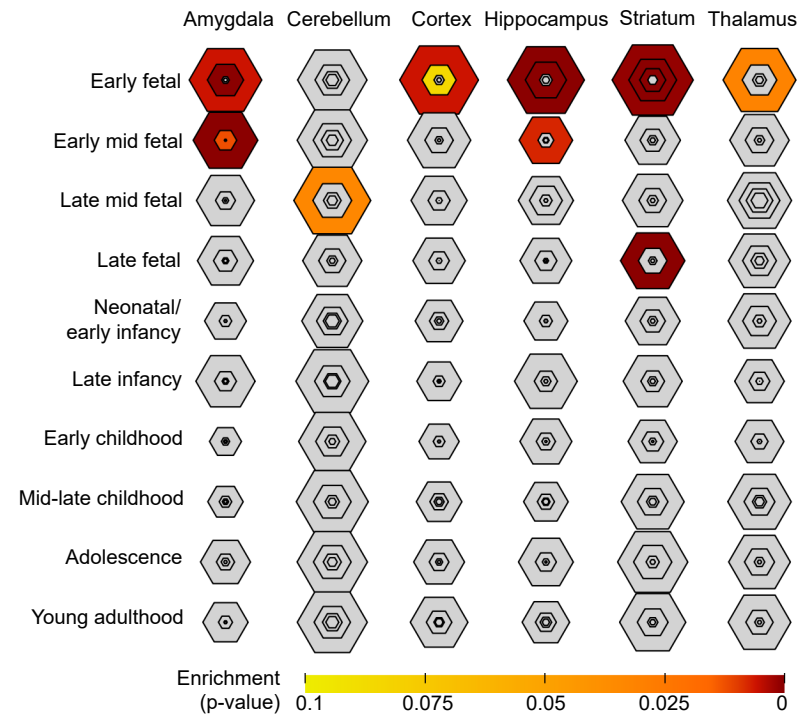

# Figure 3--Figure Supplement 5

**A** Human gene interaction network of 3q29 genes (GeneMania)

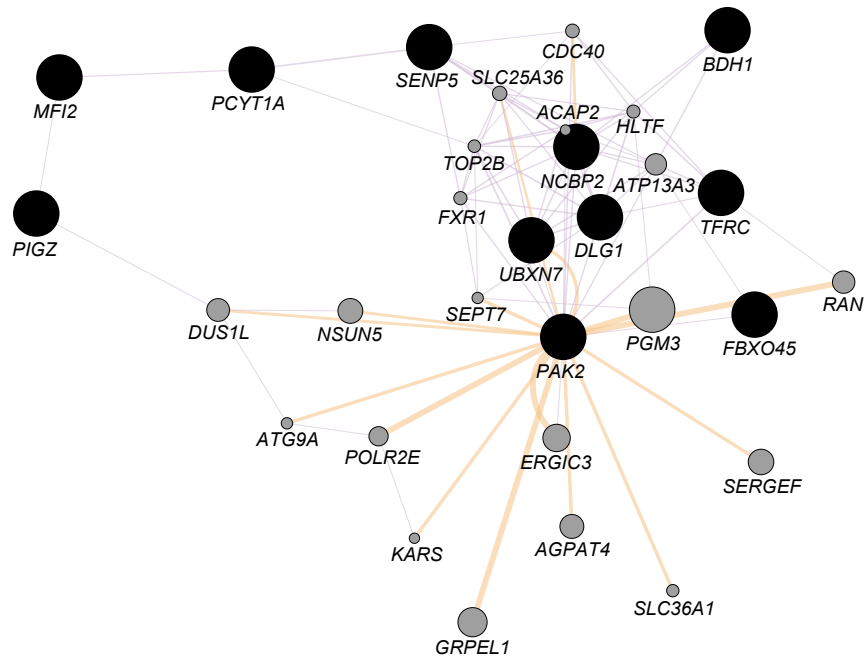

**B** Human gene interaction network of 3q29 genes (GIANT)

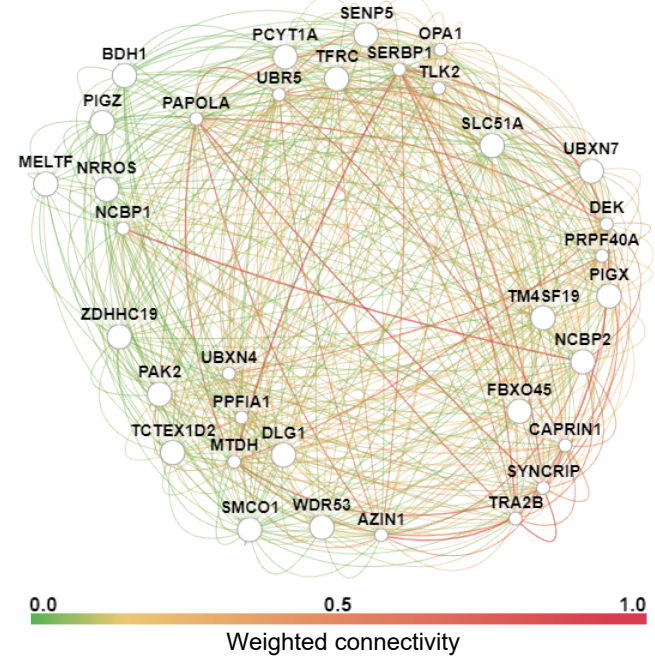

**C** Average connectivity of CNV genes in human brain-specific network

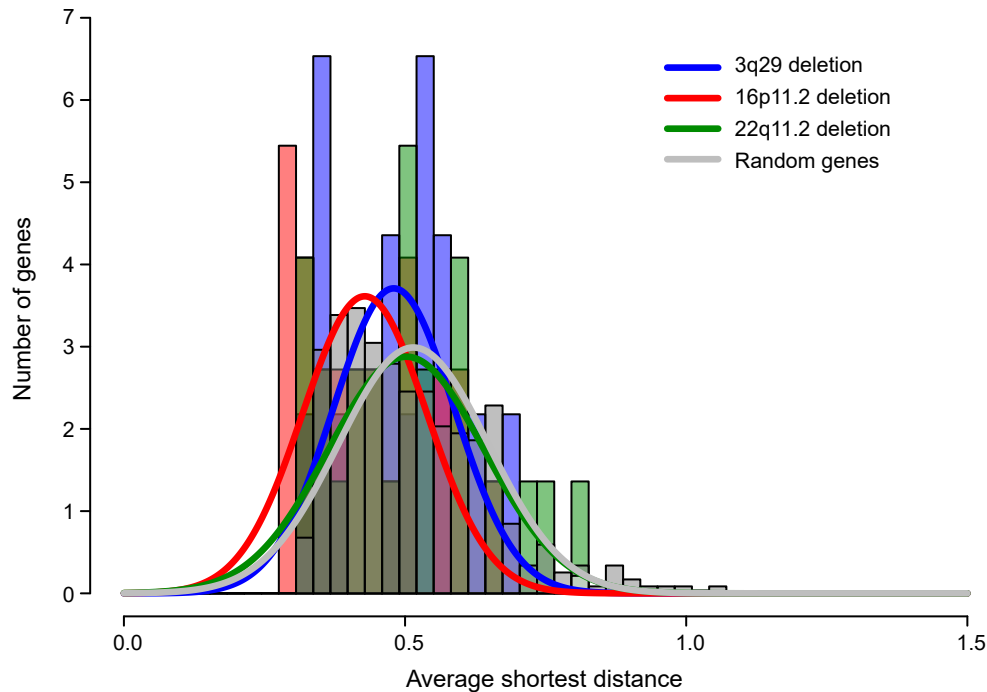

**D** Connectivity of 3q29 genes in human brain-specific network

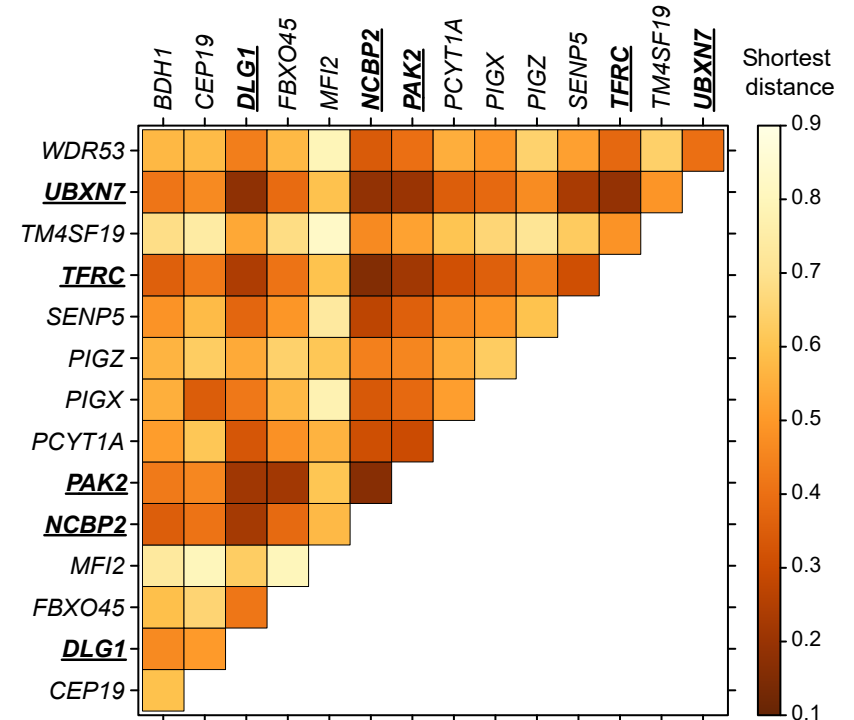

**Figure 4**

**A**

**Necrotic patches in the adult eye**

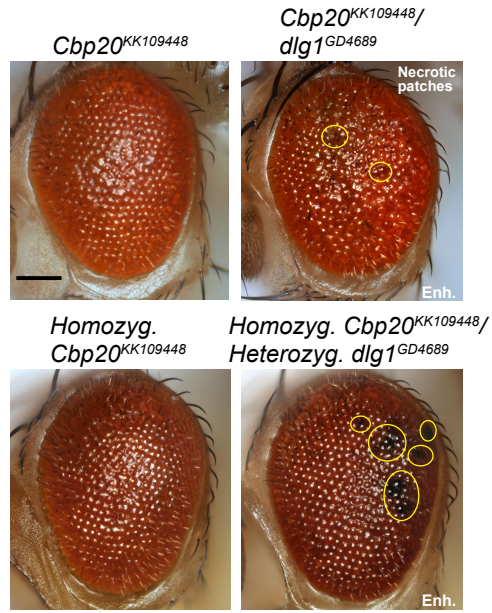

**B**

**Cellular organization defects**

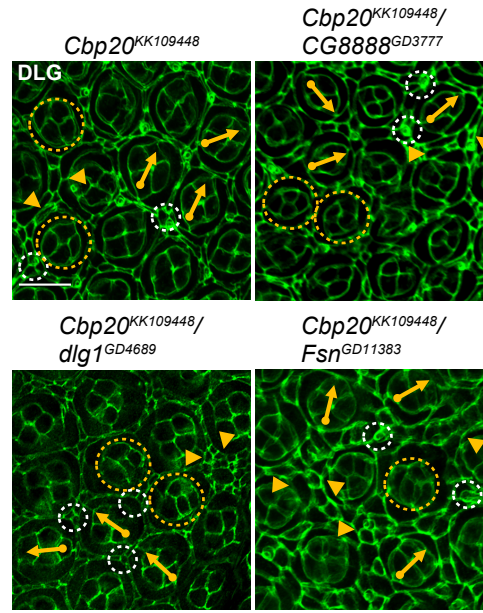

**C**

**Photoreceptor cell defects**

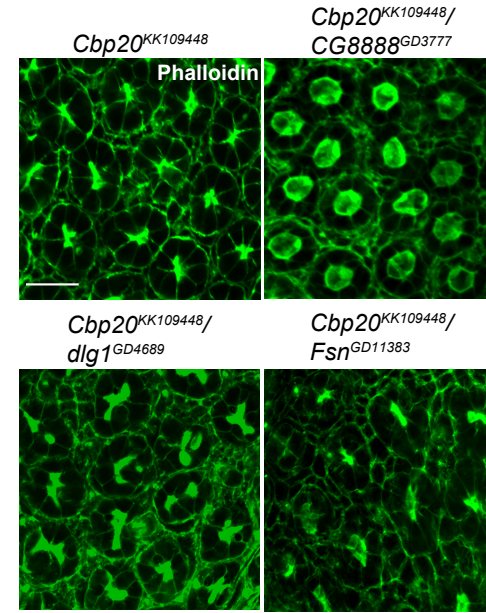

**D**

**Cellular phenotypes of pairwise knockdowns in the larval eye disc**

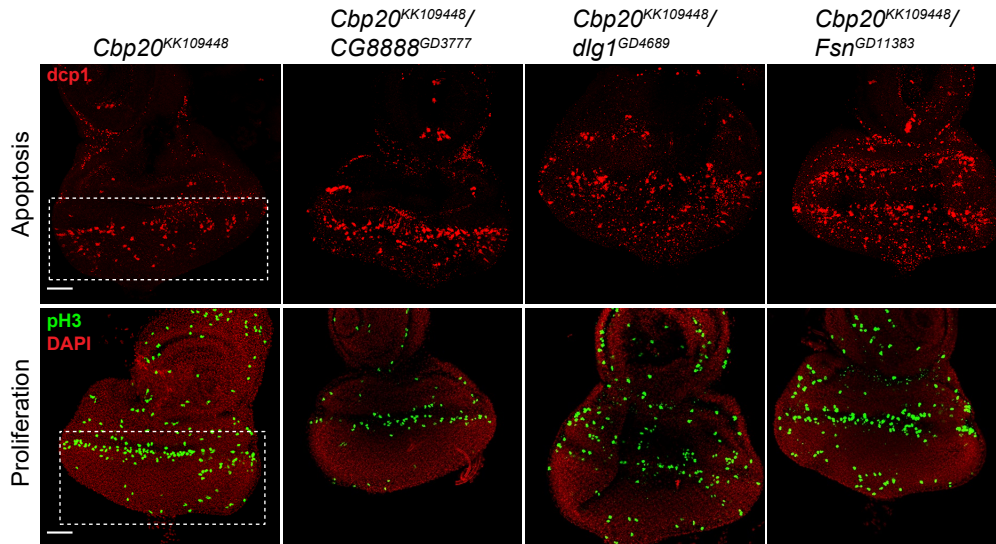

**E**

**Apoptosis defects**

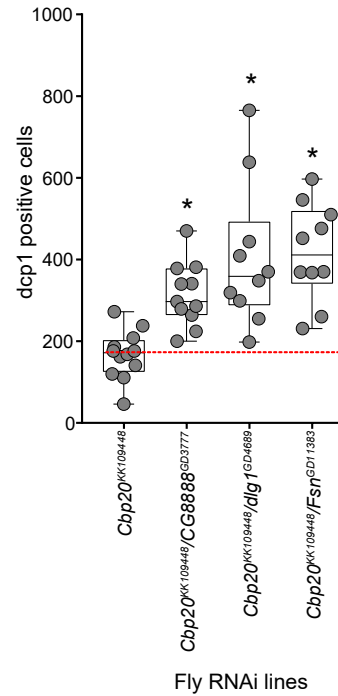

**F**

**Cell proliferation defects**

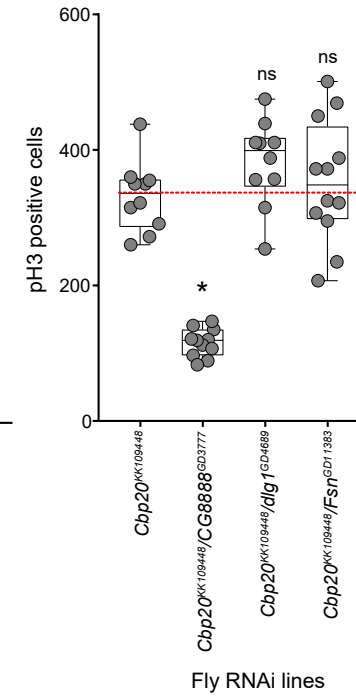

**Figure 4--Figure Supplement 1**

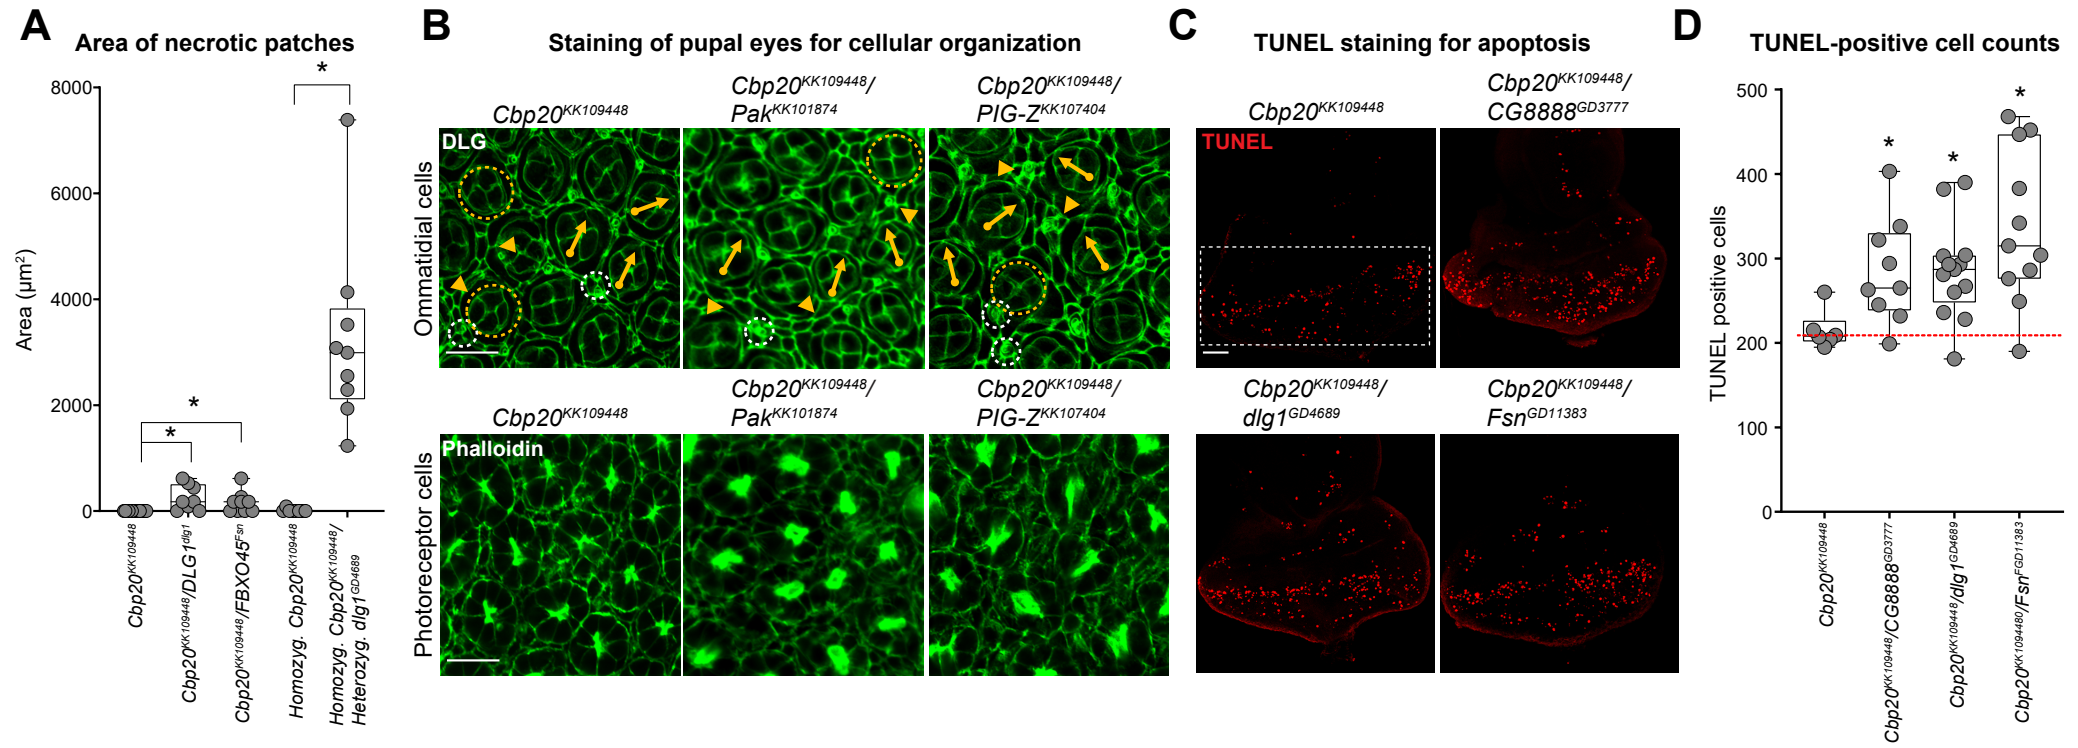

**Figure 4--Figure Supplement 2**

| Pairwise cross                                                         | Cone cell defects |                   |                   | Primary cell defect | Secondary cell defect | Bristle cell defect | Rotation error | Hexagonal defect | Photoreceptor defect |
|------------------------------------------------------------------------|-------------------|-------------------|-------------------|---------------------|-----------------------|---------------------|----------------|------------------|----------------------|
|                                                                        | Number error      | Arrangement error | Orientation error |                     |                       |                     |                |                  |                      |
| <i>dlg1</i> <sup>GD4689</sup>                                          |                   |                   | ++                |                     | +                     | +++                 | +              | ++               | +++                  |
| <i>Cbp20</i> <sup>KK109448</sup>                                       |                   |                   | ++                | +                   | ++                    | ++                  | ++             | ++               | +++                  |
| <i>Cbp20</i> <sup>KK109448</sup> /<br><i>CG8888</i> <sup>GD3777</sup>  | +                 | ++                | ++                | ++                  | ++                    | ++                  | ++             | +++              | ++++                 |
| <i>Cbp20</i> <sup>KK109448</sup> /<br><i>dlg1</i> <sup>GD4689</sup>    | +                 | ++                | ++                | ++                  | ++                    | +++                 | ++             | +                | ++++                 |
| <i>Cbp20</i> <sup>KK109448</sup> /<br><i>Fsn</i> <sup>GD11383</sup>    | +                 | ++                | ++                | ++                  | +++                   | +++                 | ++             | ++++             | ++++                 |
| <i>Cbp20</i> <sup>KK109448</sup> /<br><i>Pak</i> <sup>KK101874</sup>   |                   | ++                | ++                | +                   | ++                    | ++                  | +              | +                | +++                  |
| <i>Cbp20</i> <sup>KK109448</sup> /<br><i>PIG-Z</i> <sup>KK107404</sup> |                   |                   | +                 | ++                  | ++                    | +++                 | ++             | +++              | ++++                 |
|                                                                        |                   |                   |                   |                     |                       |                     |                |                  |                      |
| <i>Overexp Diap1</i>                                                   |                   |                   |                   |                     |                       |                     |                |                  |                      |
| <i>Cbp20</i> <sup>KK109448</sup> /<br><i>Overexp Diap1</i>             |                   |                   | +                 |                     | ++                    | +                   |                |                  |                      |
| <i>dlg1</i> <sup>GD4689</sup> /<br><i>Overexp Diap1</i>                |                   |                   | ++                |                     |                       | +++                 |                |                  |                      |



# A Figure 5

## Adult eye phenotypes with Diap1/Dronc overexpression

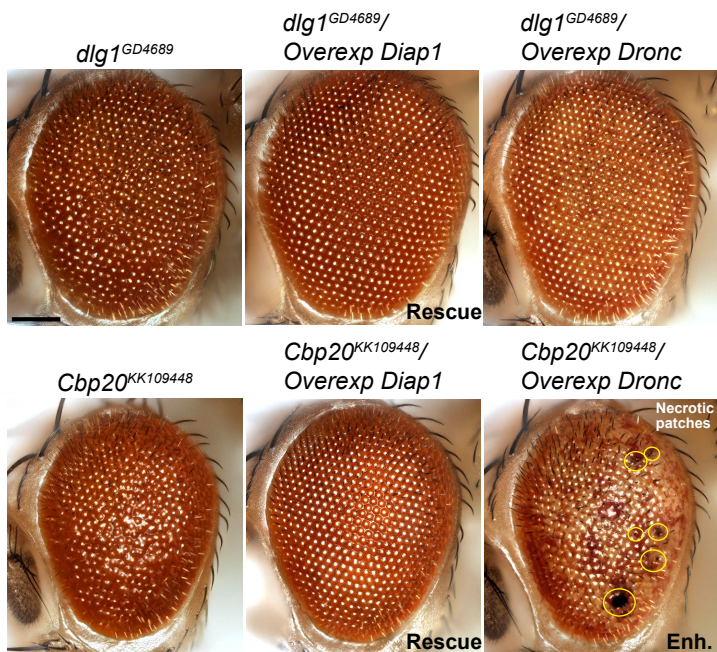

# B

## Rough eye phenotypes

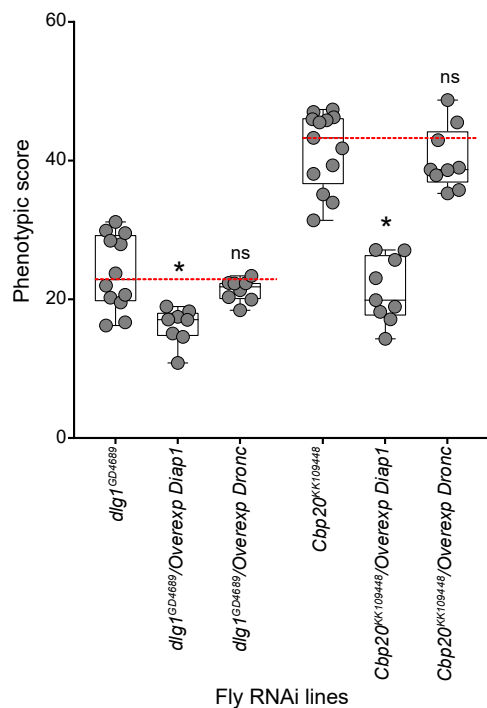

# C

## Necrotic patches

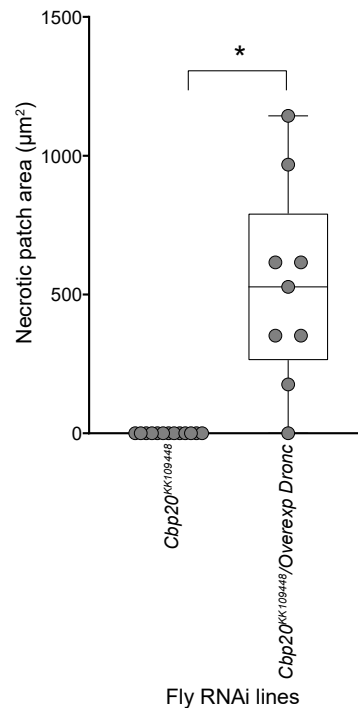

# D

## Rescue of cell organization defects

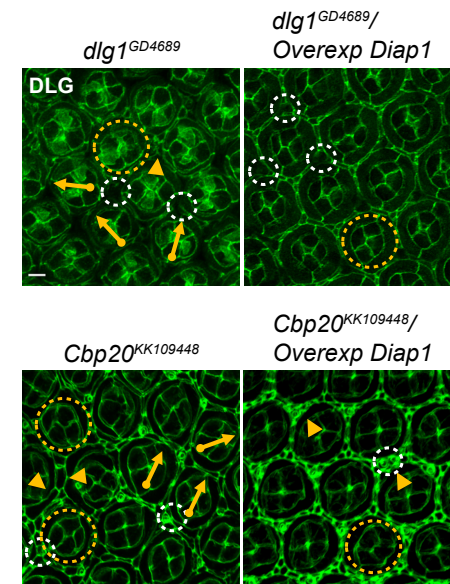

# E

## Apoptosis phenotypes in the larval eye disc

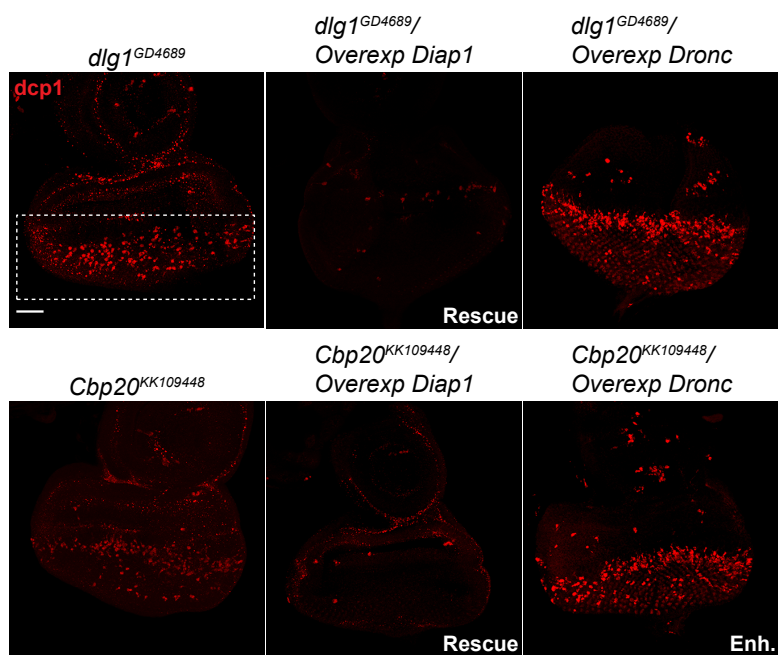

# F

## Quantification of apoptotic cells

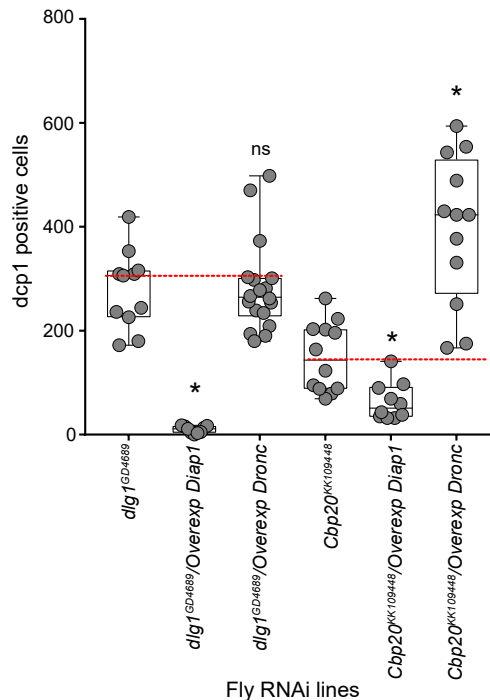

# G

## Rescue of axonal targeting defects

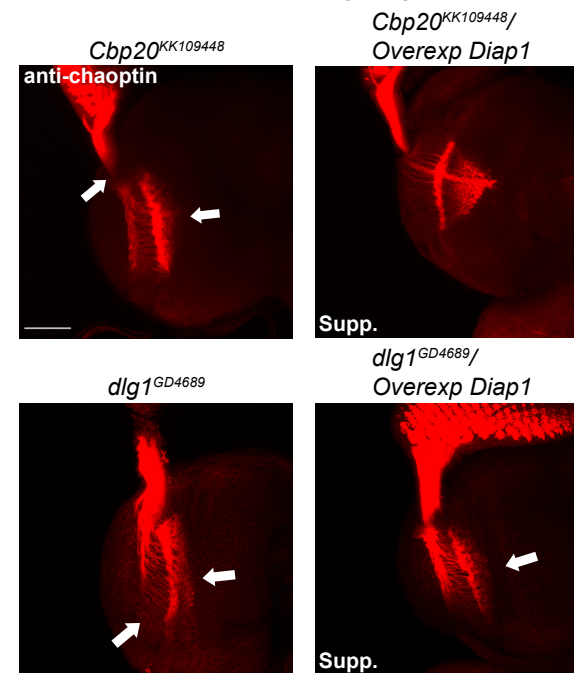



# Figure 5--Figure Supplement 1

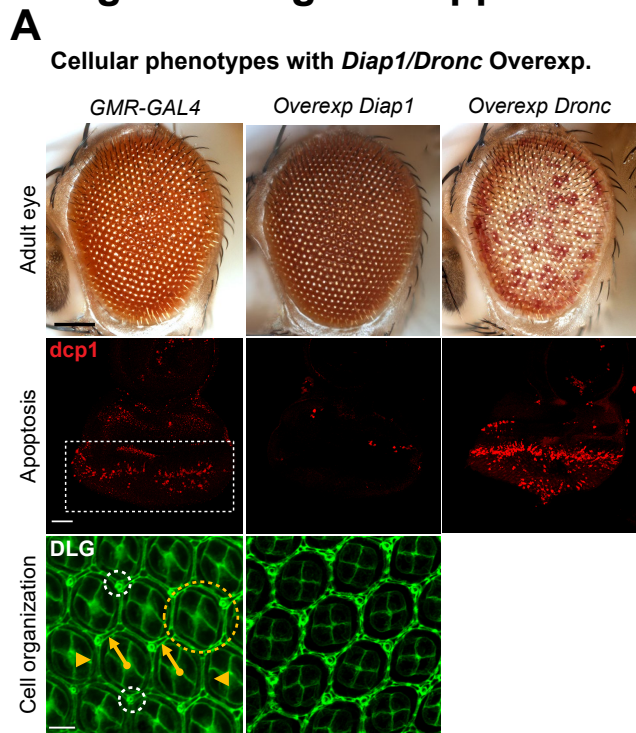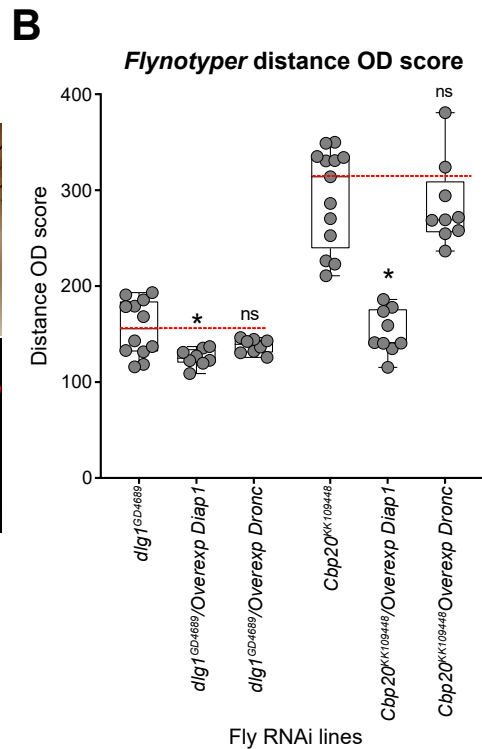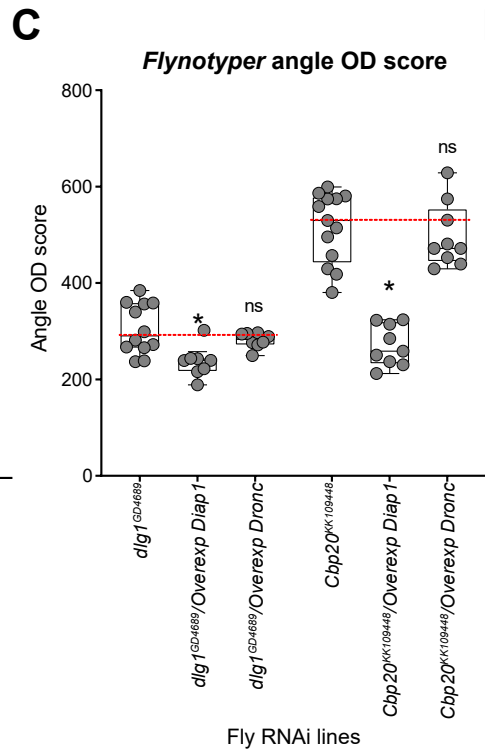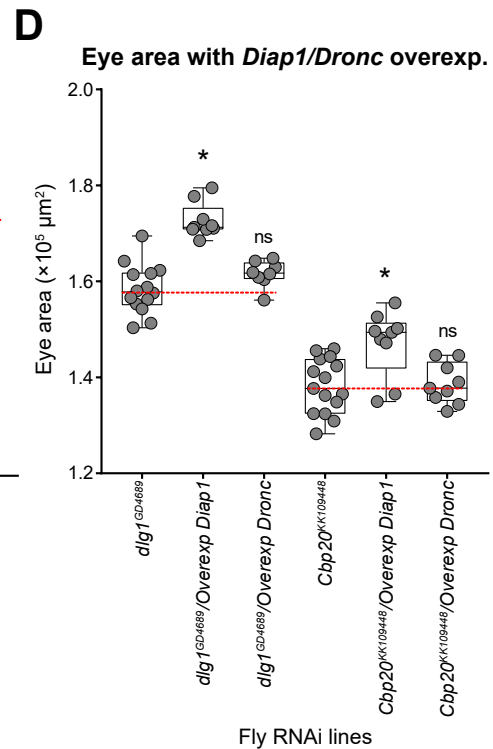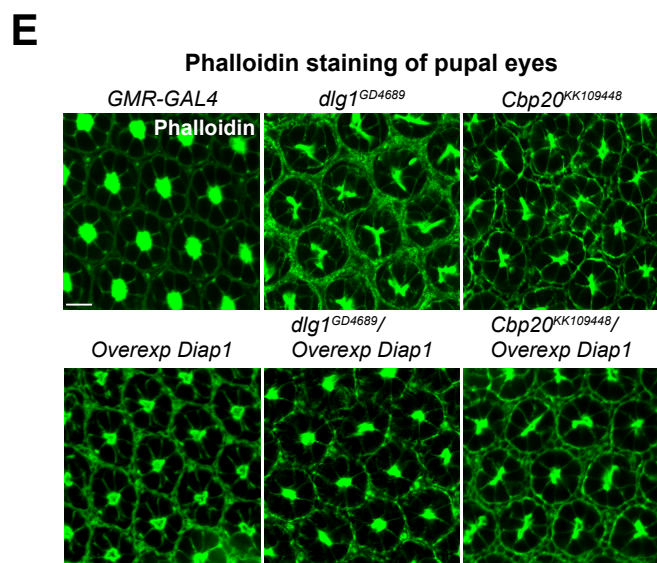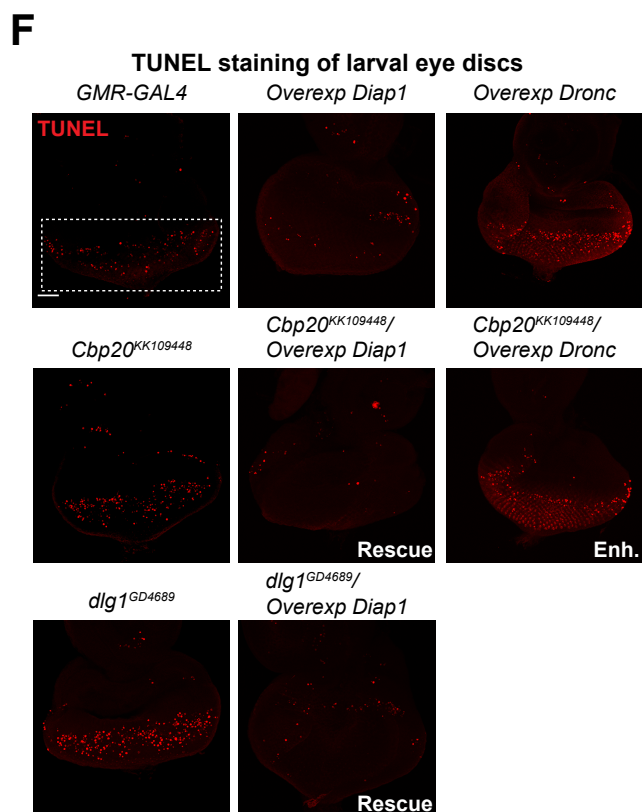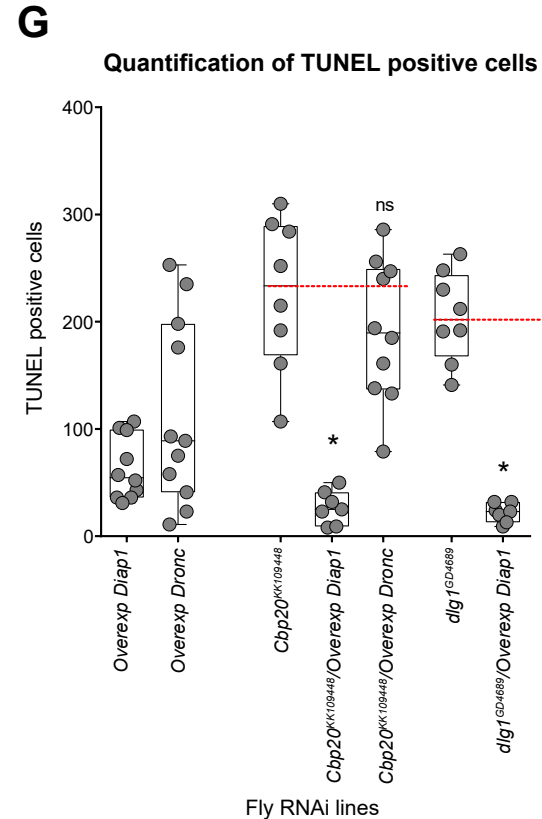

# Figure 6

**A**

## Pairwise interactions with homologs of neurodevelopmental genes

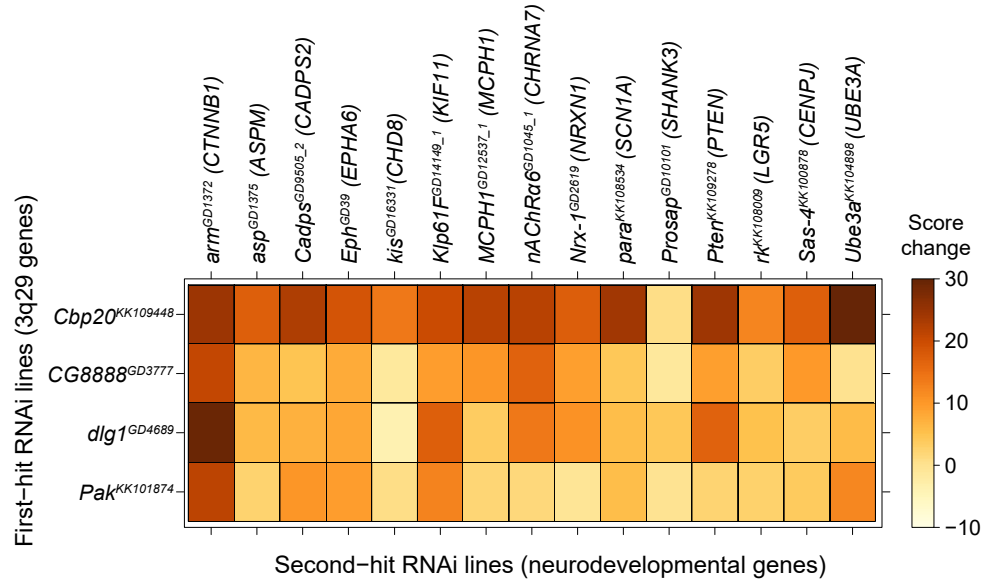

**B**

## Rough eye phenotypes of pairwise interactions

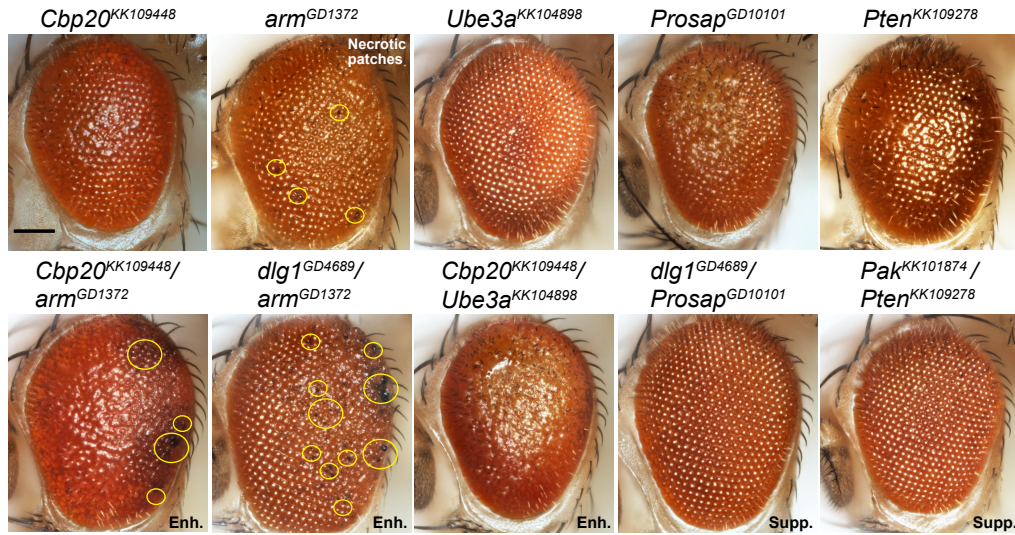

**Figure 6--Figure Supplement 1**

| <b>Second-hit gene</b>                    | <b>Cell cycle/<br/>apoptosis</b> | <b>Microcephaly</b> | <b><i>Cbp20</i><sup>KK109448</sup></b> | <b><i>CG8888</i><sup>GD3777</sup></b> | <b><i>dlg1</i><sup>GD4689</sup></b> | <b><i>Pak</i><sup>KK101874</sup></b> |
|-------------------------------------------|----------------------------------|---------------------|----------------------------------------|---------------------------------------|-------------------------------------|--------------------------------------|
| <i>arm</i>                                | X                                |                     | Enhancer (2/2)                         | Enhancer (2/2)                        | Enhancer (2/2)                      | Enhancer (2/2)                       |
| <i>asp</i>                                | X                                | X                   | Enhancer (1/1)                         | Enhancer (1/1)                        | No interaction (0/1)                | No interaction (0/1)                 |
| <i>Cadps</i>                              |                                  |                     | Enhancer (2/2)                         | Not validated (1/2)                   | Not validated (1/2)                 | Enhancer (2/2)                       |
| <i>Eph</i>                                |                                  |                     | Enhancer (3/3)                         | Enhancer (3/3)                        | Enhancer (3/3)                      | Not validated (1/3)                  |
| <i>kis</i>                                | X                                |                     | Not validated (1/2)                    | No interaction (0/2)                  | No interaction (0/2)                | No interaction (0/2)                 |
| <i>Klp61F</i>                             | X                                | X                   | Enhancer (2/2)                         | Enhancer (1/1)                        | Enhancer (1/1)                      | Enhancer (1/1)                       |
| <i>MCPH1</i>                              | X                                | X                   | Enhancer (2/3)                         | Enhancer (3/3)                        | No interaction (0/3)                | Not validated (1/3)                  |
| <i>nAChRa6</i><br><i>nAChRa7</i>          |                                  |                     | Enhancer (3/5)                         | Enhancer (3/5)                        | Enhancer (3/5)                      | Enhancer (2/5)                       |
| <i>Nrx-1</i>                              |                                  |                     | Enhancer (3/3)                         | Enhancer (3/3)                        | Enhancer (3/3)                      | No interaction (0/3)                 |
| <i>para</i>                               |                                  |                     | Enhancer (3/3)                         | Enhancer (2/3)                        | No interaction (0/3)                | Not validated (1/3)                  |
| <i>Prosap</i>                             |                                  |                     | Not validated (1/2)                    | No interaction (0/2)                  | Not validated (1/2)                 | No interaction (0/2)                 |
| <i>Pten</i>                               | X                                |                     | Enhancer (2/2)                         | Enhancer (2/2)                        | Enhancer (2/2)                      | Not validated (1/2)                  |
| <i>rk</i>                                 | X                                |                     | Enhancer (4/5)                         | Enhancer (3/5)                        | No interaction (0/5)                | No interaction (0/5)                 |
| <i>Sas-4</i>                              | X                                | X                   | Enhancer (2/2)                         | Enhancer (2/2)                        | Not validated (1/2)                 | No interaction (0/2)                 |
| <i>Ube3a</i>                              |                                  |                     | Enhancer (2/2)                         | Not validated (1/2)                   | No interaction (0/2)                | Not validated (1/2)                  |
|                                           |                                  |                     |                                        |                                       |                                     |                                      |
| <b>Lines tested (153)</b>                 |                                  |                     | 39                                     | 38                                    | 38                                  | 38                                   |
| <b>All interactions<br/>(46/60)</b>       |                                  |                     | 15/15                                  | 13/15                                 | 9/15                                | 9/15                                 |
| <b>Validated<br/>interactions (34/60)</b> |                                  |                     | 13/15                                  | 11/15                                 | 6/15                                | 4/15                                 |

# A Figure 6--Figure Supplement 2

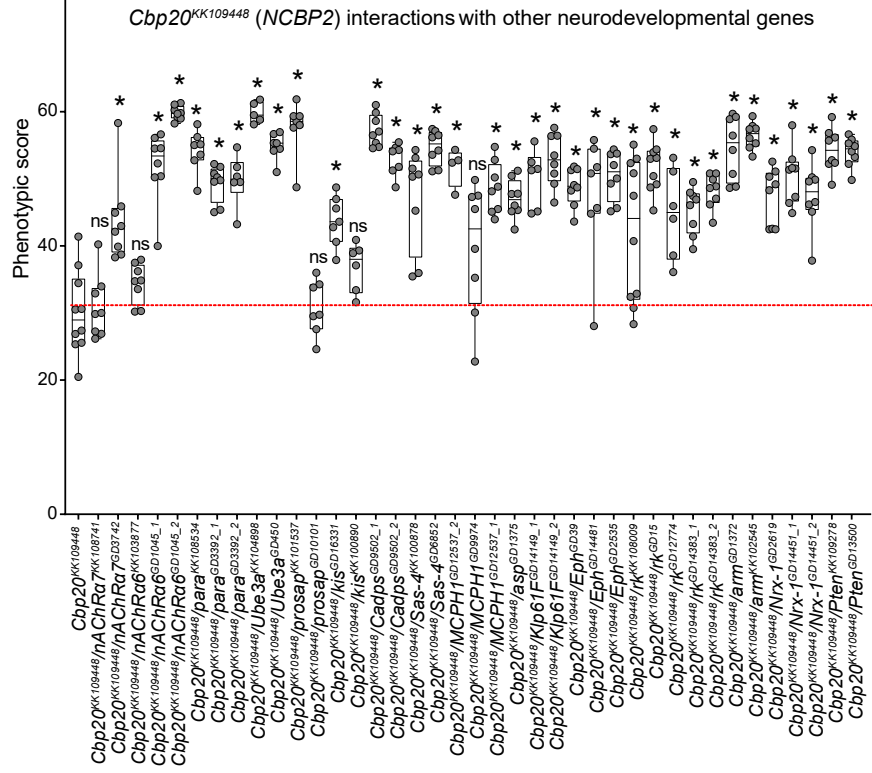

# B

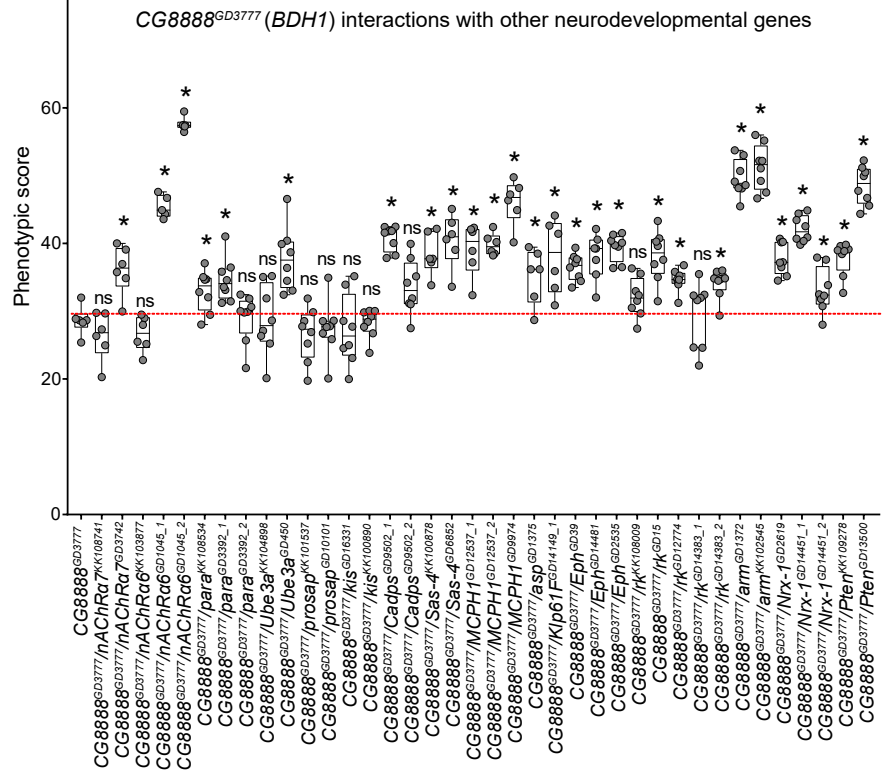

# C

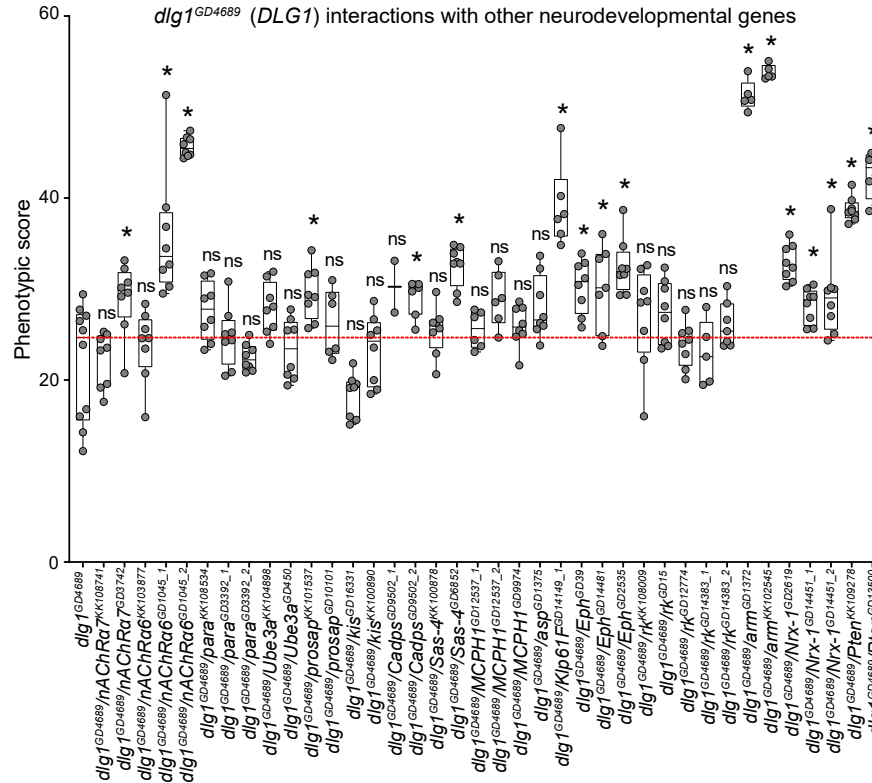

# D

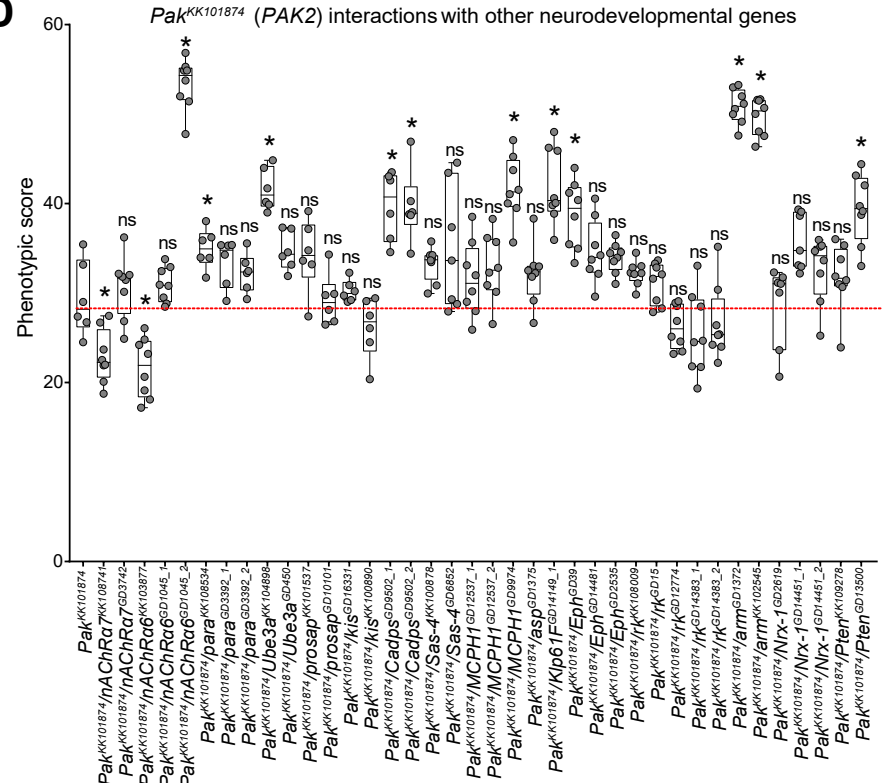



**Figure 7**

**A**

**Brain morphology defects in *X. laevis* tadpoles**

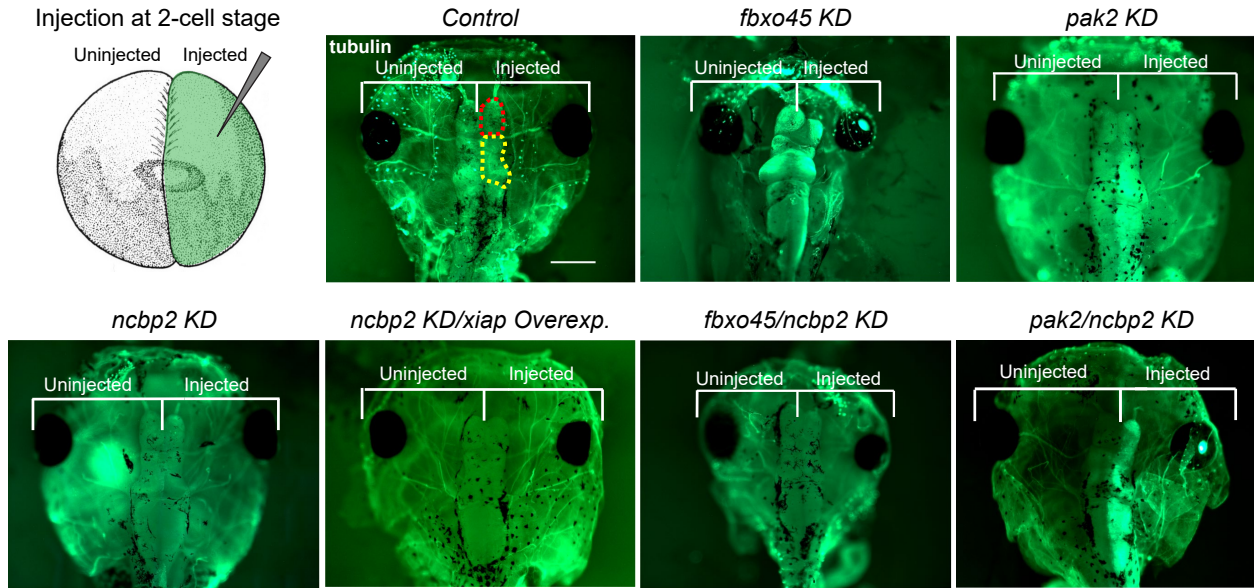

**B**

**Forebrain area defects**

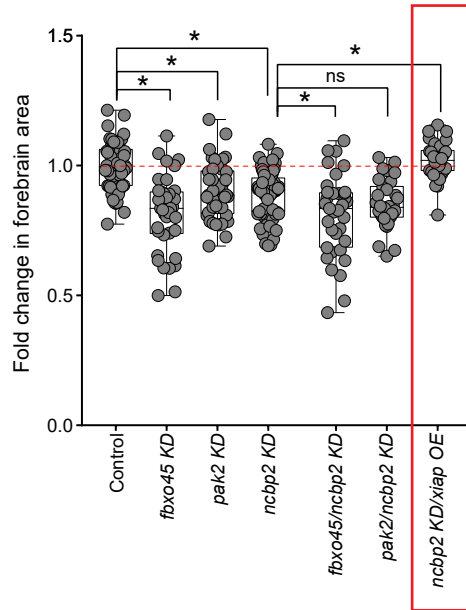

**C**

**Midbrain area defects**

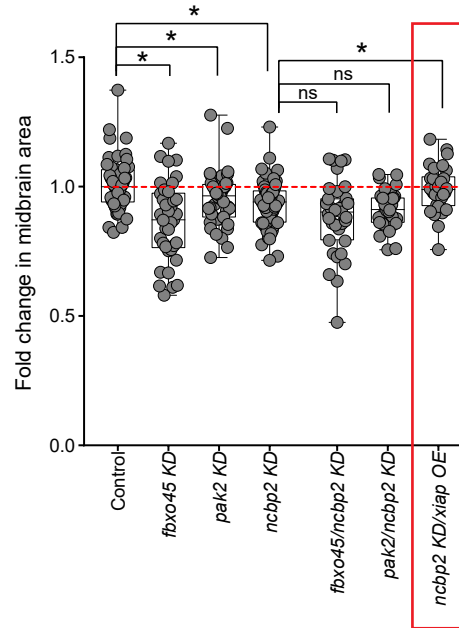

**D**

**Western blot for apoptosis markers**

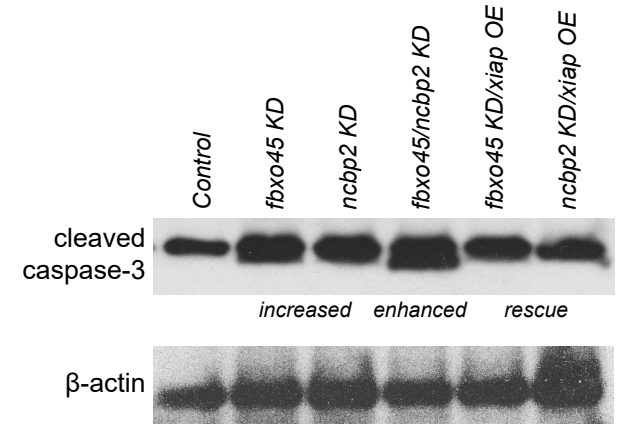

**E**

**Quantification of western blot bands**

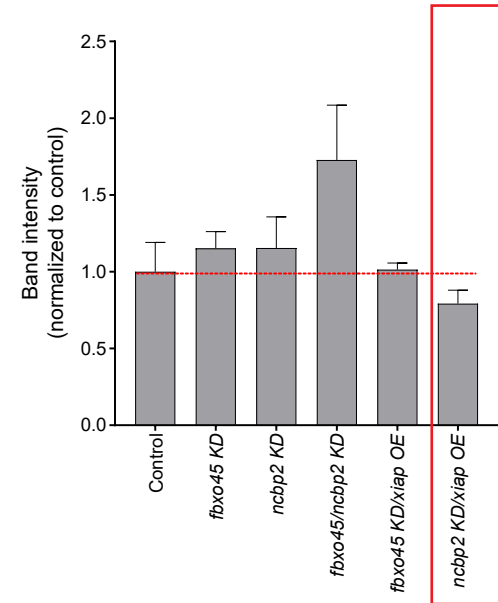

# A Figure 7--Figure Supplement 1

## Gel images for qPCR morpholino validation

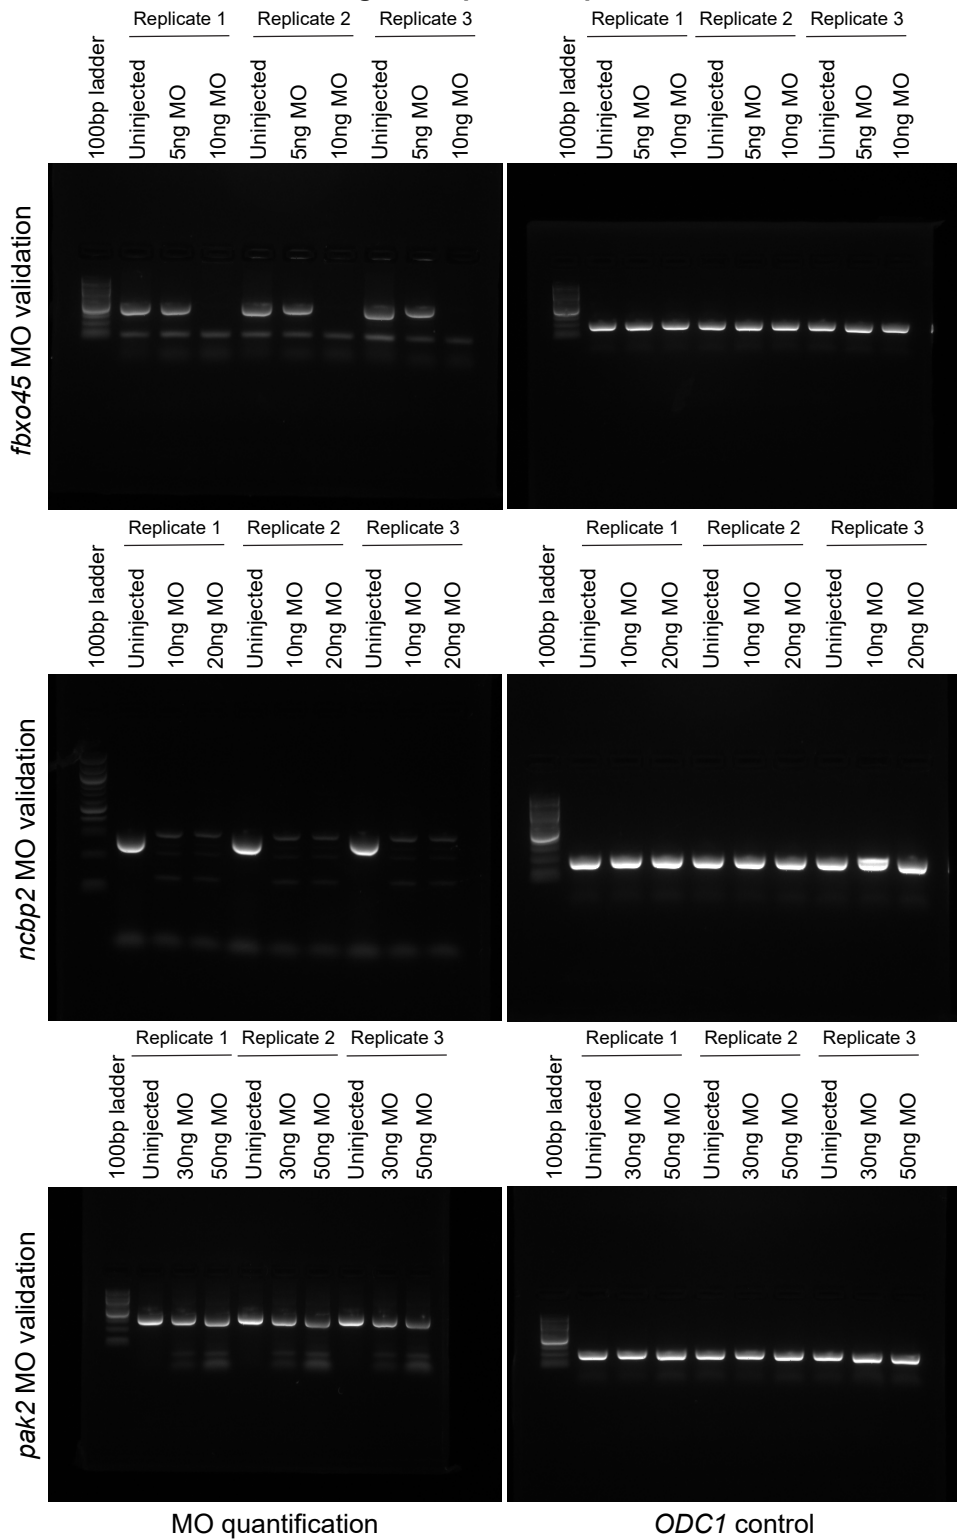

# B qPCR validations for morpholino knockdown experiments

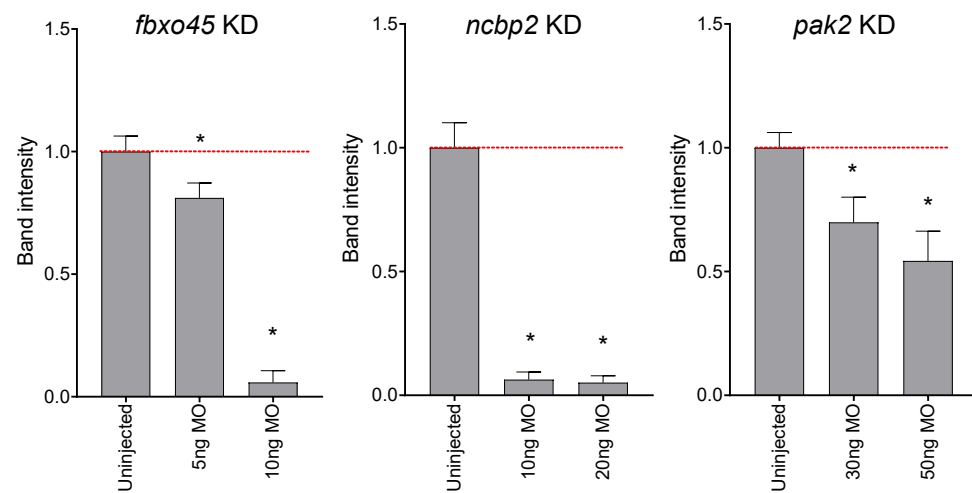

# C Western blot images for apoptosis markers

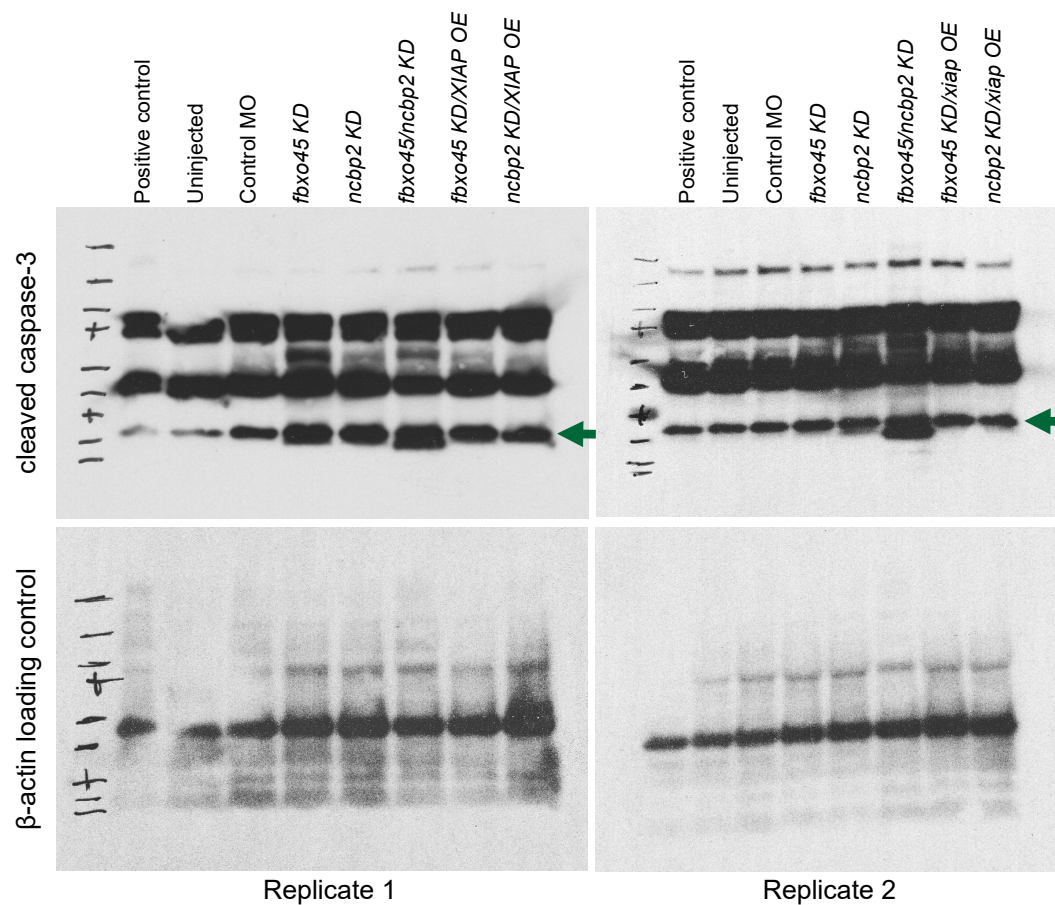



**Figure 7--Figure Supplement 2**

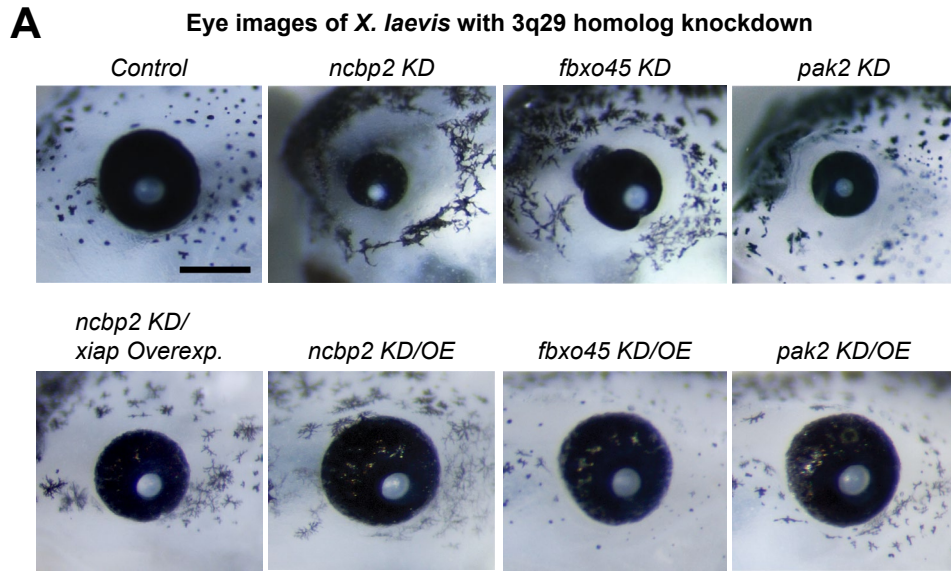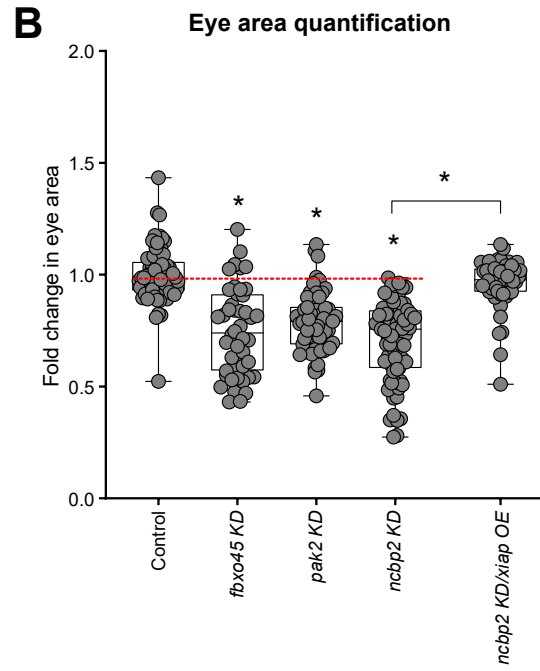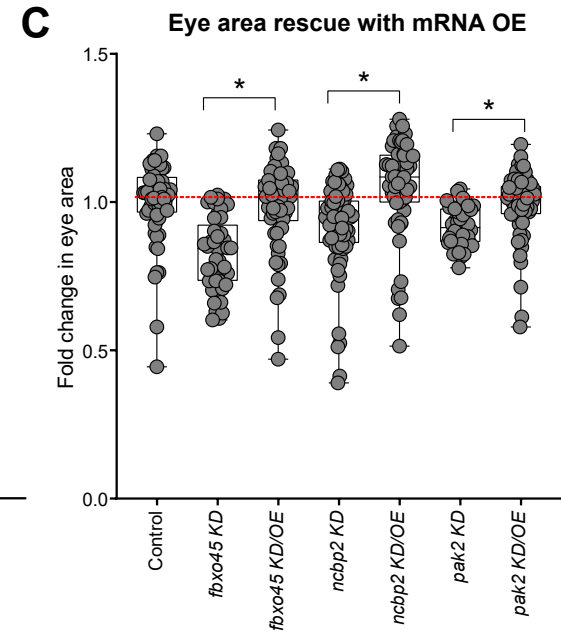

## Figure 7--Figure Supplement 3

| <i>X. laevis</i> homolog | Morpholino                                   |
|--------------------------|----------------------------------------------|
| <i>ncbp2</i>             | for L, 5'- CGGTTTCCCTAGAATAGAAACAGGT-3'      |
| <i>fbxo45</i>            | for L and S, 5'-TATCTGTGGTGGGAAGAAAAGGTCA-3' |
| <i>dlg1</i>              | for L, 5'-CAAATGAGGCAGCAACTTACTTTCT-3'       |
| <i>pak2</i>              | for L and S, 5'-AGAGATAAATCCTACCTTTTTCTGT-3' |
| standard control         | 5'-cctctacctcagttacaatttata-3'               |

## Figure 7--Figure Supplement 4

| <i>X. laevis</i> homolog | Primers                                                                                                           |
|--------------------------|-------------------------------------------------------------------------------------------------------------------|
| <i>ncbp2</i>             | forward for L allele 5'- ATCTGAGTCAGTATCGGGACC-3'<br>reverse for L allele 5'- CCCTTCCTTAAATCCTGCATCC-3'           |
| <i>fbxo45</i>            | forward for L and S allele 5'- CCGACATACTGTGCAACCTG-3'<br>reverse for L and S allele 5'-TGTCCAAGATCACCCGAATCC-3'  |
| <i>dlg1</i>              | forward for L allele 5'-CTCTCCTATGAACCCGTCAC-3'<br>reverse for L allele 5'-CCGGCCTCTATGAATTTGTG-3'                |
| <i>pak2</i>              | forward for L and S allele 5'-AGGATAAACCACCAGCTCCTC-3'<br>reverse for L and S allele 5'-GGGAGCCCATCTTTATCTGGTG-3' |
| <i>ODC1</i> control      | forward 5'- GCCATTGTGAAGACTCTCTCCATTC-3'<br>reverse 5'- TTCGGGTGATTCCTTGCCAC-3'                                   |

**Figure 8**

**A**

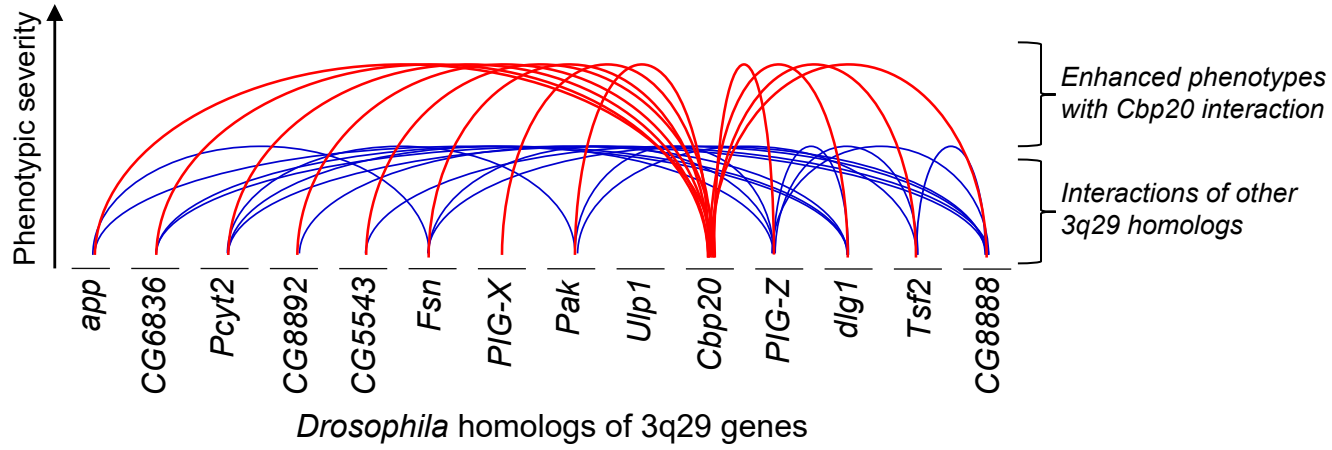

**B**

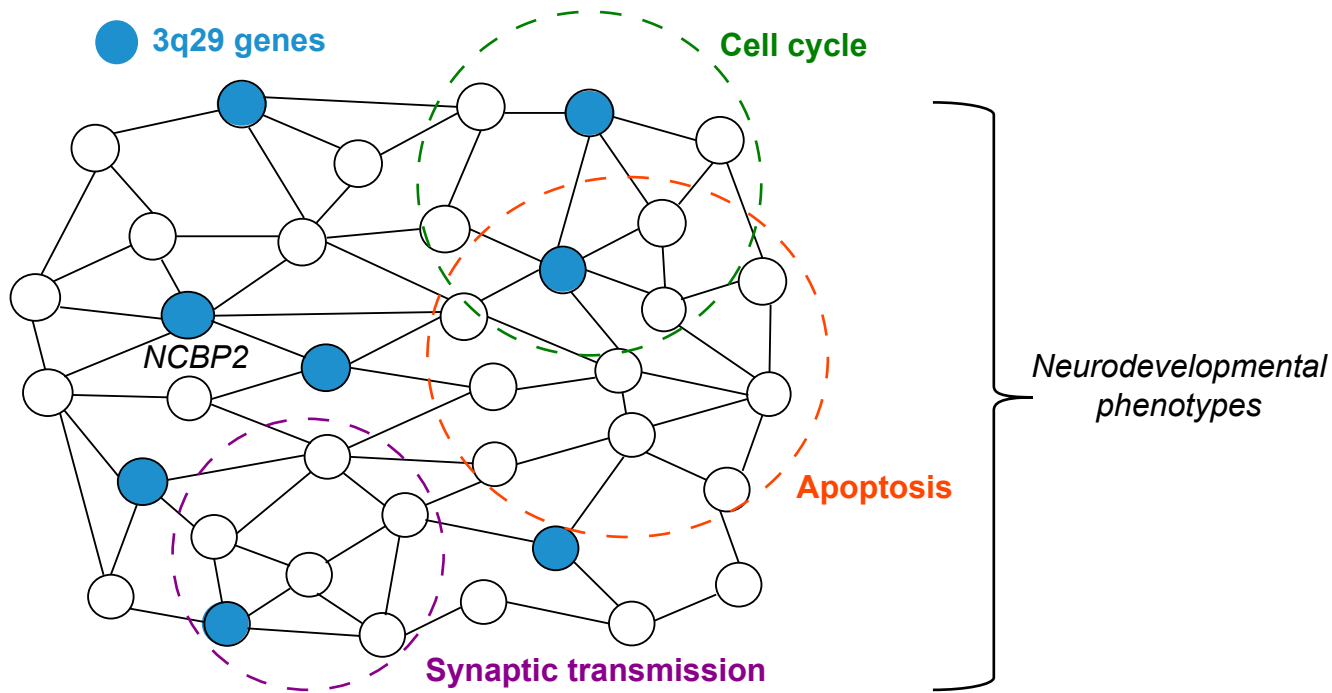

**Figure 8--Figure Supplement 1**

| <b>3q29 deletion mouse models</b>          | <i>B6J.Del16<sup>+/-Bdh1-Tfrc</sup></i><br>(Baba et al.) | <i>B6N.Del16<sup>+/-Bdh1-Tfrc</sup></i><br>(Rutkowski et al.) | <i>B6N.Dlg1<sup>+/-</sup></i><br>(Rutkowski et al.) | <i>Pak2<sup>+/-</sup></i><br>(Wang et al.)            |
|--------------------------------------------|----------------------------------------------------------|---------------------------------------------------------------|-----------------------------------------------------|-------------------------------------------------------|
| Weight                                     | Decreased                                                | Decreased                                                     | No phenotype                                        | Not tested                                            |
| Brain size                                 | Decreased                                                | Decreased                                                     | Not tested                                          | No phenotype                                          |
| Locomotor activity                         | No phenotype                                             | No phenotype                                                  | No phenotype                                        | No phenotype                                          |
| Amphetamine-induced locomotor activity     | Not tested                                               | Increased                                                     | Increased                                           | Not tested                                            |
| Anxiety (elevated plus maze or open field) | Not tested                                               | No phenotype                                                  | No phenotype                                        | No phenotype                                          |
| Spatial learning and memory (water maze)   | Not tested                                               | Decreased                                                     | No phenotype                                        | No phenotype                                          |
| Acoustic startle response                  | Increased                                                | Increased                                                     | No phenotype                                        | No phenotype                                          |
| Prepulse inhibition/sensorimotor gating    | Decreased                                                | No phenotype                                                  | No phenotype                                        | No phenotype                                          |
| Startle response w/risperidone             | Rescued                                                  | Not tested                                                    | Not tested                                          | Not tested                                            |
| Marble burying                             | Not tested                                               | No phenotype                                                  | No phenotype                                        | Increased                                             |
| Self-grooming                              | Increased                                                | Not tested                                                    | Not tested                                          | Increased                                             |
| Social interaction (free or 3-chamber)     | Decreased                                                | Decreased                                                     | No phenotype                                        | Decreased                                             |
| Fear conditioning (context)                | Decreased                                                | No phenotype                                                  | No phenotype                                        | Not tested                                            |
| Auditory excitatory neuron activity        | Increased                                                | Not tested                                                    | Not tested                                          | Not tested                                            |
| Parvalbumin neuronal count                 | Decreased                                                | Not tested                                                    | Not tested                                          | Not tested                                            |
| Dendritic spine density                    | Not tested                                               | Not tested                                                    | Not tested                                          | Decreased                                             |
| Long-term potentiation                     | Not tested                                               | Not tested                                                    | Not tested                                          | Decreased                                             |
| Synaptic density                           | Not tested                                               | Not tested                                                    | Not tested                                          | Decreased                                             |
| Neuronal migration                         | Not tested                                               | Not tested                                                    | Not tested                                          | Decreased                                             |
| Transcriptome                              | Immediate early signaling genes                          | Not tested                                                    | Not tested                                          | Post-synaptic density, cytoskeleton, channel activity |

## Figure 8--Figure Supplement 2

| Candidate gene set                | Overlap with apoptosis (%) | Simulated overlap with apoptosis |      |      | Percentile of observed overlap | Empirical p-value         |
|-----------------------------------|----------------------------|----------------------------------|------|------|--------------------------------|---------------------------|
|                                   |                            | Min.                             | Mean | Max. |                                |                           |
| Autism (n=756)                    | 106 (14.0%)                | 40                               | 71   | 104  | 100%                           | $p < 1.00 \times 10^{-5}$ |
| Intellectual disability (n=1,854) | 265 (14.3%)                | 121                              | 170  | 223  | 100%                           | $p < 1.00 \times 10^{-5}$ |
| Schizophrenia (n=2,546)           | 268 (10.5%)                | 180                              | 237  | 302  | 98.6%                          | $p = 0.014$               |
