1 ***NCBP2* modulates neurodevelopmental defects of the 3q29 deletion in**  
2 ***Drosophila* and *X. laevis* models**

3

4 Short title: ***Drosophila* and *X. laevis* models of the 3q29 deletion**

5

6 Mayanglambam Dhruva Singh<sup>1\*</sup>, Matthew Jensen<sup>1\*</sup>, Micaela Lasser<sup>2</sup>, Emily Huber<sup>1</sup>, Tanzeen  
7 Yusuff<sup>1</sup>, Lucilla Pizzo<sup>1</sup>, Brian Lifschutz<sup>1</sup>, Inshya Desai<sup>1</sup>, Alexis Kubina<sup>1</sup>, Sneha Yennawar<sup>1</sup>,  
8 Sydney Kim<sup>2</sup>, Janani Iyer<sup>1</sup>, Diego E. Rincon-Limas<sup>3</sup>, Laura Anne Lowery<sup>2</sup>, and Santhosh  
9 Girirajan<sup>1,4</sup>

10

11 1. Department of Biochemistry and Molecular Biology, Pennsylvania State University,  
12 University Park, PA 16802 USA

13 2. Department of Biology, Boston College, Chestnut Hill, MA 02467 USA

14 3. Department of Neurology, McKnight Brain Institute, University of Florida,  
15 Gainesville, FL 32611 USA

16 4. Department of Anthropology, Pennsylvania State University, University Park, PA  
17 16802 USA

18

19 \*contributed equally to the work

20

21 Correspondence:

22 Santhosh Girirajan, MBBS, PhD

23 205A Life Sciences Building

24 Pennsylvania State University

25 University Park, PA 16802

26 E-mail: [sxg47@psu.edu](mailto:sxg47@psu.edu)

27 Phone: 814-865-0674

28

29

## 30 **ABSTRACT**

31 The 1.6 Mbp deletion on chromosome 3q29 is associated with a range of neurodevelopmental  
32 disorders, including schizophrenia, autism, microcephaly, and intellectual disability. Despite  
33 its importance towards neurodevelopment, the role of individual genes, genetic interactions,  
34 and disrupted biological mechanisms underlying the deletion have not been thoroughly  
35 characterized. Here, we used quantitative methods to assay *Drosophila melanogaster* and  
36 *Xenopus laevis* models with tissue-specific individual and pairwise knockdown of 14  
37 homologs of genes within the 3q29 region. We identified developmental, cellular, and  
38 neuronal phenotypes for multiple homologs of 3q29 genes, potentially due to altered  
39 apoptosis and cell cycle mechanisms during development. Using the fly eye, we screened for  
40 314 pairwise knockdowns of homologs of 3q29 genes and identified 44 interactions between  
41 pairs of homologs and 34 interactions with other neurodevelopmental genes. Interestingly,  
42 *NCBP2* homologs in *Drosophila* (*Cbp20*) and *X. laevis* (*ncbp2*) enhanced the phenotypes of  
43 homologs of the other 3q29 genes, leading to significant increases in apoptosis that disrupted  
44 cellular organization and brain morphology. These cellular and neuronal defects were rescued  
45 with overexpression of the apoptosis inhibitors *Diap1* and *xiap* in both models, suggesting  
46 that apoptosis is one of several potential biological mechanisms disrupted by the deletion.  
47 *NCBP2* was also highly connected to other 3q29 genes in a human brain-specific interaction  
48 network, providing support for the relevance of our results towards the human deletion.  
49 Overall, our study suggests that *NCBP2*-mediated genetic interactions within the 3q29 region  
50 disrupt apoptosis and cell cycle mechanisms during development.

51

## 52 **AUTHOR SUMMARY**

53 Rare copy-number variants, or large deletions and duplications in the genome, are associated  
54 with a wide range of neurodevelopmental disorders. The 3q29 deletion confers an increased  
55 risk for schizophrenia, autism, and microcephaly. To understand the conserved biological  
56 mechanisms that are disrupted by this deletion, we systematically tested 14 individual  
57 homologs and 314 pairwise interactions of 3q29 genes for neuronal, cellular, and  
58 developmental phenotypes in *Drosophila melanogaster* and *Xenopus laevis* models. We  
59 found that multiple homologs of genes within the deletion region contribute towards  
60 developmental defects, such as larval lethality and disrupted cellular organization.  
61 Interestingly, we found that *NCBP2* acts as a key modifier gene within the region, enhancing  
62 the developmental phenotypes of each of the homologs for other 3q29 genes and leading to  
63 disruptions in apoptosis and cell cycle pathways. Our results suggest that multiple genes

64 within the 3q29 region interact with each other through shared mechanisms and jointly

65 contribute to neurodevelopmental defects.

66

## 67 INTRODUCTION

68 Rare copy number variants (CNVs), including deletions and duplications in the human  
69 genome, significantly contribute to complex neurodevelopmental disorders such as  
70 schizophrenia, intellectual disability/developmental delay, autism, and epilepsy [1,2]. Despite  
71 extensive phenotypic heterogeneity associated with recently described CNVs [3], certain rare  
72 CNVs have been linked to specific neuropsychiatric diagnoses. For example, the 22q11.2  
73 deletion (DiGeorge/velocardiofacial syndrome), the most frequently occurring pathogenic  
74 CNV, is found in about 1-2% of individuals with schizophrenia [4,5], and animal models of  
75 several genes within the region show neuronal and behavioral phenotypes on their own [6,7].  
76 Similarly, the 1.6 Mbp recurrent deletion on chromosome 3q29, encompassing 21 genes, was  
77 initially identified in individuals with a range of neurodevelopmental features, including  
78 intellectual disability, microcephaly, craniofacial features, and speech delay [8,9]. Further  
79 studies have implicated this deletion as a major risk factor for multiple disorders [10]. In fact,  
80 the deletion confers a >40-fold increase in risk for schizophrenia [11,12] as well as a >20-  
81 fold increase in risk for autism [13]. More recently, two studies have reported decreases in  
82 body and brain sizes as well as a range of behavioral and social defects in mouse models of  
83 the entire deletion, mimicking the human developmental phenotypes associated with the  
84 deletion [14,15].

85 Identifying the biological underpinnings of the 3q29 deletion is contingent upon  
86 uncovering the conserved molecular mechanisms linking individual genes or combinations of  
87 genes within the 3q29 region to the neurodevelopmental phenotypes observed in individuals  
88 with the entire deletion. Recent studies have suggested a subset of genes in the 3q29 region as  
89 potential candidates for these phenotypes based on their established roles in neuronal  
90 development [16,17]. For example, *DLG1* is a scaffolding protein that organizes the synaptic  
91 structure at neuromuscular junctions [18], affecting both synaptic density and plasticity  
92 during development [19]. However, mouse models of *Dlg1*<sup>+/-</sup> did not recapitulate the  
93 behavioral and developmental phenotypes observed in mice with the entire deletion [14],  
94 suggesting that haploinsufficiency of *DLG1* by itself does not account for the wide range of  
95 phenotypes associated with the deletion. Given that genes within rare pathogenic CNV  
96 regions tend to share similar biological functions [20] and interact with each other to  
97 contribute towards developmental phenotypes [21,22], it is likely that multiple genes within  
98 3q29 jointly contribute to these phenotypes through shared cellular pathways. Therefore, an  
99 approach that integrates functional analysis of individual genes within the 3q29 deletion and

100 their combinatorial effects on neuronal and cellular phenotypes is necessary to understand the  
101 pathways and mechanisms underlying the deletion.

102         Systematic testing of genes within 3q29 towards developmental and cellular  
103 phenotypes requires model systems that are amenable for rapid phenotypic evaluation and  
104 allow for testing interactions between multiple dosage-imbalanced genes without affecting  
105 the viability of the organism. *Drosophila melanogaster* and *Xenopus laevis* provide such  
106 powerful genetic models for studying conserved mechanisms that are altered in  
107 neurodevelopmental disorders, with the ability to manipulate gene expression in a tissue-  
108 specific manner in *Drosophila* [23] and examine developmental defects in *X. laevis* [24].  
109 Both model systems contain homologs for a majority of disease-causing genes in humans,  
110 and show a high degree of conservation in key developmental pathways [23,25–27]. For  
111 example, *Drosophila* knockdown models of the candidate schizophrenia gene *DTNBP1*  
112 showed dysregulation of synaptic homeostasis and altered glutamatergic and dopaminergic  
113 neuron function [28,29], and fly models for *UBE3A*, the gene associated with Angelman  
114 syndrome, showed sleep, memory and locomotor defects [30]. Furthermore, *X. laevis* models  
115 have been widely used to identify morphological and neuronal defects associated with  
116 developmental disorders [24], such as dendritic connectivity defects with overexpression of  
117 *MECP2*, the causative gene for Rett syndrome [31]. Thus, *Drosophila* and *X. laevis* models  
118 of individual CNV homologs and their interactions would allow for a deeper dissection of the  
119 molecular mechanisms disrupted by the deletion, complementing the phenotypes documented  
120 in mouse models of the entire deletion [14,15].

121         Here, we used a mechanistic approach to understand the role of individual homologs  
122 of 3q29 genes and their interactions towards the cellular processes underlying the deletion.  
123 We systematically characterized developmental, cellular, and nervous system phenotypes for  
124 14 conserved homologs of human 3q29 genes and 314 pairwise interactions using  
125 *Drosophila*, and validated these phenotypes using *X. laevis*. We found that multiple  
126 homologs of genes within the 3q29 region, including *NCBP2*, *DLG1*, *FBXO45*, *PIGZ*, and  
127 *BDHI*, contribute to disruptions in apoptosis and cell cycle pathways, leading to neuronal and  
128 developmental defects in both model systems. These defects were further enhanced when  
129 each of the homologs were concomitantly knocked down with homologs of *NCBP2* in  
130 *Drosophila* (*Chp20*) and *X. laevis* (*ncbp2*), resulting in increased apoptosis and dysregulation  
131 of cell cycle genes. Our results support an oligogenic model for the 3q29 deletion, and  
132 implicate specific cellular mechanisms disrupted by genes in the deletion region.

## 133 RESULTS

### 134 Reduced expression of individual homologs of 3q29 genes causes global developmental 135 defects

136 We used reciprocal BLAST and orthology prediction tools (see Methods) to identify fly  
137 homologs for 15 of the 21 genes within the 3q29 deletion region (**Fig. 1, S1 Table**). We note  
138 that the genes and crosses tested in this study are represented as fly gene names along with  
139 the human counterparts at first mention in the text, i.e. *Cbp20* (*NCBP2*), and fly genes with  
140 allele names in the figures, i.e. *Cbp20*<sup>KK109448</sup>. We found that the biological functions of these  
141 15 genes were also conserved between *Drosophila* and humans, as 61 of the 69 Gene  
142 Ontology terms (88.4%) annotations for the human genes were also annotated for their  
143 respective fly homologs (**S1 File**). For example, *dlg1* (*DLG1*) and *Cbp20* (*NCBP2*) share the  
144 same roles in both flies and vertebrates, as a scaffolding protein at the synaptic junction [32]  
145 and a member of the RNA cap binding complex [33], respectively. We used RNA  
146 interference (RNAi) and the *UAS-GAL4* system to knockdown expression levels of fly  
147 homologs of genes within the 3q29 region ubiquitously and in neuronal, wing and eye tissues  
148 [34] (**Fig. 1**). A stock list of the fly lines used in this study and full genotypes for all  
149 experiments are provided in **S2 File**. Quantitative PCR (qPCR) confirmed partial knockdown  
150 of gene expression for each of the tested homologs (**S2 Table**); fly lines for *CG5359*  
151 (*TCTEXID2*) were excluded from further analysis after additional quality control assessment  
152 (see Methods). To identify genes essential for organism survival and neurodevelopment, we  
153 first assessed the effect of ubiquitous knockdown of homologs of 3q29 genes using the *da-*  
154 *GAL4* driver (**Fig. 2A**). Seven of the 14 homologs, including *dlg1*, *Cbp20*, and *Tsf2* (*MF12*),  
155 showed lethality or severe developmental defects with ubiquitous knockdown, suggesting  
156 that multiple homologs of 3q29 genes are essential for viability during early development.  
157 Similarly, wing-specific *bx*<sup>MS1096</sup>-*GAL4* knockdown of *Tsf2*, *Cbp20*, *CG8888* (*BDH1*), and  
158 *Pak* (*PAK2*) showed severe wing defects, and wing-specific knockdown of *dlg1* showed  
159 larval lethality (**S1 Fig.**).

160 Several fly homologs for genes within the 3q29 region have previously been  
161 associated with a range of neuronal defects during fly development (**S3 Table**). For example,  
162 loss of *dlg1* contributed to morphological and physiological defects at the neuromuscular  
163 junction (NMJ), as well as increased brain size, abnormal courtship behavior, and loss of  
164 gravitaxis response [35–37]. Similarly, *Pak* mutant flies exhibited extensive defects in the  
165 axonal targeting of sensory and motor neurons [38,39], in addition to abnormal NMJ and  
166 mushroom body development [40,41]. We sought to determine whether fly homologs for

167 other genes in the 3q29 region also contribute to defects in neuronal function, and therefore  
168 performed climbing assays for motor defects and staining of larval brains for axonal targeting  
169 with pan-neuronal knockdown of the fly homologs. Interestingly, *Elav-GAL4* mediated pan-  
170 neuronal knockdown caused larval or pupal lethality in *dlg1*, *Tsf2*, and *CG5543 (WDR53)*  
171 flies (**Fig. 2A**), and about 30% of adult flies with knockdown of *dlg1* did not survive beyond  
172 day 5 (**S1 Fig.**), indicating an essential role for these genes in neuronal development.  
173 Furthermore, we found that flies with pan-neuronal knockdown of several homologs of 3q29  
174 genes, including *dlg1* and *Cbp20*, exhibited a strong reduction in climbing ability over ten  
175 days (**Fig. 2B, S1 Video**), suggesting that these genes could contribute to abnormalities in  
176 synaptic and motor functions [42]. We next examined the axonal projections of photoreceptor  
177 cells into the optic lobe by staining third instar larval brains with anti-chaoptin. We found that  
178 *GMR-GAL4* mediated eye-specific knockdown of *Cbp20*, *dlg1*, *Pak* and *Fsn (FBXO45)*  
179 showed several axonal targeting defects (**S1 Fig., S4 Table**). Our results recapitulated the  
180 previous findings in *Pak* mutant flies [38], and were similar to targeting defects observed in  
181 models of other candidate neurodevelopmental genes, including *Drosophila* homologs for  
182 human *DISC1* and *FMRI* [43,44]. Overall, our data show that multiple conserved homologs  
183 of genes in the 3q29 region beyond just *dlg1* or *Pak* are important for *Drosophila*  
184 neurodevelopment.

185

### 186 ***Drosophila* eye models for genes within the 3q29 region show cellular defects**

187 The *Drosophila* compound eye has been classically used to perform high-throughput genetic  
188 screens and quantitative assays of cellular and neurodevelopmental defects [45]. In fact,  
189 about two-thirds of all vital genes in the fly genome are predicted to be involved in fly eye  
190 development [46]. For instance, the *Drosophila* eye model was recently used to screen a large  
191 set of intellectual disability genes [47], and genetic interaction studies using the fly eye have  
192 identified modifier genes for Rett syndrome, spinocerebellar ataxia type 3, and other  
193 conserved developmental processes [48–50]. We used the developing fly eye as an *in vivo*  
194 system to quantify the effect of gene knockdown on adult eye morphology, cellular  
195 organization in the pupal eye, and cell proliferation and death in the larval imaginal eye disc  
196 (**Fig. 1, S2 Fig.**). The wild-type adult *Drosophila* eye consists of about 750 ommatidia  
197 containing different cell types arranged in a regular hexagonal structure, which can be easily  
198 perturbed by genetic modifications [51,52]. Because of this, we first performed eye-specific  
199 RNAi knockdown of fly homologs of genes in the 3q29 region using *GMR-GAL4*, and  
200 measured the rough eye phenotype of each knockdown line using *Flynotyper*, a quantitative

201 tool that calculates a phenotypic score based on defects in ommatidial arrangement [53]. We  
202 found that eye-specific knockdown of 8/13 homologs of 3q29 genes showed significant  
203 external eye phenotypes compared with control *GMR-GAL4* flies, while knockdown of *Tsf2*  
204 caused lethality (**Fig. 2C, S3 Fig.**). For example, knockdown of *Cbp20* resulted in a severe  
205 rough eye phenotype that was comparable to knockdown of other neurodevelopmental genes  
206 [53], such as *Prosap* (*SHANK3*) and *kis* (*CHD8*) (**S5 Table**).

207 To examine the cellular mechanisms underlying the rough eye phenotypes observed  
208 with knockdown of fly homologs of 3q29 genes, we first measured changes in area and  
209 ommatidial size of the adult eyes. We found a significant reduction in eye size with  
210 knockdown of *CG8888* and *Cbp20*, while the eyes of flies with knockdown of *dlg1* were  
211 significantly larger than *GMR-GAL4* controls (**Fig. 2D**). Similarly, we observed decreases in  
212 ommatidial diameter with knockdown of *Cbp20* and *CG8888*, suggesting that these genes  
213 may also contribute to abnormal cell growth phenotypes (**S3 Fig.**). We also assessed the  
214 cellular structure of 44 hour-old pupal eyes by staining the ommatidial and photoreceptor  
215 cells with anti-DLG, a septate junction marker, and Phalloidin, a marker for F-actin at cell  
216 boundaries (**S2 Fig.**). We found that knockdown of 11/12 tested homologs of 3q29 genes  
217 caused disorganization or loss of the photoreceptor neurons and ommatidial cells (**Fig. 2E, S4**  
218 **Fig., S6 Table**). For example, pupal eyes with knockdown of *CG8888*, *dlg1*, *Cbp20* and  
219 *CG5543* all showed defects in cone cell orientation and ommatidial rotation compared with  
220 control *GMR-GAL4* flies. Furthermore, *Cbp20* and *dlg1* knockdown flies showed hexagonal  
221 defects and severe disorganization of photoreceptor neurons, while *Cbp20* knockdown flies  
222 also showed fused secondary cells and *dlg1* knockdown flies showed a complete loss of  
223 bristle cells.

224 We next hypothesized that abnormal proliferation and apoptosis could contribute to  
225 the cellular defects observed with knockdown of fly homologs of 3q29 genes. To test this, we  
226 stained the third instar larval eye discs for select knockdowns of individual homologs of 3q29  
227 genes with anti-pH3 (phospho-Histone H3 (Ser10)) and *Drosophila* caspase-1 (*dcp1*),  
228 markers for proliferating and apoptotic cells, and quantified the number of cells posterior to  
229 the morphogenetic furrow (**S2 Fig.**). We observed a significant decrease in pH3-positive cells  
230 for *CG8888* knockdown flies and trends towards increased pH3-positive cells for *PIG-Z*  
231 (*PIGZ*) knockdown flies compared with *GMR-GAL4* controls ( $p=0.165$ ) (**Fig. 2F, S4 Fig.**),  
232 while knockdown of *dlg1* led to significant increases in cells stained with bromodeoxyuridine  
233 (BrdU), a marker for replicating cells (**S4 Fig.**). Flies with knockdown of *Cbp20* or *dlg1* also  
234 showed a significant increase in apoptotic *dcp1*-positive cells compared with controls (**Fig.**



235 **2G**), which we validated using TUNEL assays for these lines (**S4 Fig.**). We further tested for  
236 proliferation and apoptosis in the third instar larval wing discs of flies with knockdown of  
237 homologs of 3q29 genes using the *bx<sup>MS1096</sup>-GAL4* driver, and observed changes in both  
238 processes with knockdown of *dlg1*, *CG8888* and *Cbp20* (**S5 Fig.**). Knockdown of *Cbp20* in  
239 particular showed dcp1-positive staining across the entire wing pouch in the larval wing disc.  
240 These data suggest that knockdown of multiple fly homologs of genes in the 3q29 region  
241 contribute to defects in apoptosis and proliferation during early development, leading to the  
242 observed defects in cell count and organization (**Table 1**).

243

### 244 **Interactions between fly homologs of 3q29 genes enhance neuronal phenotypes**

245 As knockdown fly models for homologs of multiple 3q29 genes showed a variety of  
246 neuronal, developmental, and cellular defects, we hypothesized that these genes could  
247 interact with each other to further disrupt cellular processes during development. We  
248 therefore generated *GMR-GAL4* recombined lines for nine fly homologs of 3q29 genes, and  
249 crossed these lines with multiple RNAi or mutant lines for other homologs to generate 161  
250 two-hit crosses for testing 94 pairwise gene interactions (**Fig. 1, S7 Table**). We found a  
251 significant enhancement in eye phenotypic severity, measured using *Flynotyper* and validated  
252 with a second line when available, for 39 pairwise knockdowns compared with recombined  
253 lines crossed with control flies (represented in the figures as *Cbp20<sup>KK109448</sup>/Control*) (**Fig. 3A,**  
254 **S6 Fig., S7 Fig.**). In fact, we found that 19 out of 21 pairwise interactions involving *Cbp20* as  
255 either a first or second-hit gene resulted in more severe eye phenotypes, suggesting that  
256 reduced expression of *Cbp20* drastically modifies the morphological phenotypes of other  
257 homologs of 3q29 genes (**Fig. 3B-D**). For further validation, we compared pairs of reciprocal  
258 crosses (i.e. *Fsn/CG8888* versus *CG8888/Fsn*) and confirmed concordant results for 19/26  
259 reciprocal interactions, including 14/16 reciprocal interactions involving *Cbp20* (**S7 Table**).  
260 We also found a non-significant increase in severity for *dlg1/Pak* knockdown flies using both  
261 RNAi and mutant lines, concordant with enhanced neuromuscular junction and circadian  
262 rhythm defects observed in mutant *dlg1/Pak* flies described by Grice and colleagues [54].

263 As *Cbp20* knockdown enhanced the rough eye phenotypes of multiple other  
264 homologs, we next tested for enhancement of neuronal defects among flies with knockdown  
265 of *Cbp20* and homologs of other 3q29 genes. We found that simultaneous knockdown of  
266 *Cbp20* with *dlg1* or *Fsn* led to an increase in severity of axon targeting defects (**Fig. 3E**). For  
267 instance, while knockdown of *Cbp20* mostly led to mild-to-moderate axon targeting defects,  
268 such as loss of R7-R8 axon projection into the medulla, we observed more severe loss of

269 projection for all axons with simultaneous knockdown of *Cbp20* and *dlg1* or *Fsn* (**S4 Table**).  
270 We also tested pan-neuronal *Elav-GAL4* knockdown of select pairs of homologs, and found  
271 that both *Cbp20/dlg1* and *Cbp20/Fsn* significantly enhanced the climbing defects observed  
272 with knockdown of *Cbp20* alone (**Fig. 3F, S2 Video**). Overall, these data show that *Cbp20*  
273 interacts with other homologs of genes in the 3q29 region to enhance the observed cellular  
274 and neuronal defects (**Table 1**).

275 To further characterize the functional effects of interactions between homologs of  
276 3q29 genes, we analyzed changes in gene expression by performing RNA-sequencing of  
277 heads from flies with select pan-neuronal knockdown of individual (*Cbp20*, *dlg1*, *Fsn*, and  
278 *Pak*) and pairs (*Cbp20/dlg1* and *Cbp20/Fsn*) of homologs of 3q29 genes. We identified  
279 differentially-expressed genes in each of the tested fly models compared with *Elav-GAL4*  
280 controls, and performed enrichment analysis on both differentially-expressed fly genes and  
281 their corresponding human homologs (**S3 File**). We found that knockdown of each individual  
282 homolog showed enrichment for dysregulation of cellular and developmental processes (**S8**  
283 **Fig.**). For example, flies with knockdown of *dlg1* and *Cbp20* showed enrichment for  
284 dysregulation of homologs for human synaptic transmission genes, such as *Glt* (*NLGN1*) and  
285 *nAChRβ3* (*HTR3A*). Furthermore, flies with knockdown of *Cbp20* were enriched for  
286 dysregulated fly genes related to metabolic processes, while knockdown of *Fsn* led to  
287 dysregulation of fly genes involved in response to external stimuli and immune response. We  
288 also found that homologs of key signaling genes dysregulated in mouse models of the 3q29  
289 deletion, reported by Baba and colleagues [15], were differentially expressed in our fly  
290 models for homologs of 3q29 genes. In fact, knockdown of *Fsn* led to altered expression for  
291 each of the “early immediate” signaling genes dysregulated in the deletion mouse model [15].  
292 While dysregulated genes in *Cbp20/dlg1* knockdown flies showed enrichments for protein  
293 folding and sensory perception, *Cbp20/Fsn* knockdown flies were uniquely enriched for  
294 dysregulated homologs of cell cycle genes, including *Aura* (*AURKA*), *Cdk1* (*CDK1*), *lok*  
295 (*CHEK2*), and *CycE* (*CCNE1*) (**S8 Fig.**). We similarly found 17 differentially-expressed  
296 homologs corresponding to human apoptosis genes in *Cbp20/Fsn* knockdown flies, including  
297 the DNA fragmentation gene *Sid* (*ENDOG*) and the apoptosis signaling genes *tor* (*RET*) and  
298 *Hsp70Bb* (*HSPA1A*). Furthermore, we found a strong enrichment for fly genes whose human  
299 homologs are preferentially expressed in early and mid-fetal brain tissues among the  
300 dysregulated genes in *Cbp20/Fsn* knockdown flies (**S8 Fig.**). These data suggest that *Cbp20*  
301 interacts with other homologs of genes in the 3q29 region to disrupt a variety of key

302 biological functions, including apoptosis and cell cycle pathways as well as synaptic  
303 transmission and metabolic pathways (**Table 1**).

304 Finally, to complement the interactions among homologs of 3q29 genes that we  
305 identified in *Drosophila*, we examined the connectivity patterns of 3q29 genes within the  
306 context of human gene interaction databases. Gene interaction networks derived from co-  
307 expression and protein-protein interaction data [55,56] showed large modules of connected  
308 genes within the 3q29 region, including a strongly-connected component involving 11/21  
309 3q29 genes (**Fig. 4A-B**). However, the average connectivity among 3q29 genes within a  
310 brain-specific interaction network [57] was not significantly different from the connectivity  
311 of randomly-selected sets of genes throughout the genome (**Fig. 4C**), suggesting that a subset  
312 of genes drive the complexity of genetic interactions within the region. This paradigm was  
313 previously observed among genes in the 22q11.2 deletion region, where interactions between  
314 *PRODH* and *COMT* modulate neurotransmitter function independently of other genes in the  
315 region [58]. In fact, five genes in the 3q29 region, including *NCBP2*, *PAK2*, and *DLG1*,  
316 showed significantly higher connectivity to other 3q29 genes compared with the average  
317 connectivity of random sets of genes (**Fig. 4D**). Interestingly, *NCBP2* showed the highest  
318 connectivity of all genes in the region, further highlighting its role as a key modulator of  
319 genes within the region.

320

### 321 **Interactions between *Cbp20* and other homologs of 3q29 genes enhance apoptosis** 322 **defects**

323 Cell death and proliferation are two antagonistic forces that maintain an appropriate number  
324 of neurons during development [59]. In fact, both processes have been previously identified  
325 as candidate mechanisms for several neurodevelopmental disorders [60–62]. While  
326 knockdown of *Cbp20* with other homologs of 3q29 genes likely disrupts multiple cellular  
327 processes that contribute towards the enhanced cellular defects, we next specifically  
328 investigated the role of apoptosis towards these defects, as larval eye and wing discs with  
329 knockdown of *Cbp20* showed strong increases in apoptosis. We observed black necrotic  
330 patches on the ommatidia in adult eyes with knockdown of *Cbp20/dlg1* and *Cbp20/Fsn*,  
331 indicating that an increase in cell death occurs with these interactions (**Fig. 5A, S9 Fig**). In  
332 fact, significantly larger regions of necrotic patches were observed in flies homozygous for  
333 *Cbp20* RNAi and heterozygous for *dlg1* RNAi (see **S2 File** for full genotype annotation),  
334 suggesting that the knockdown of both homologs contributes to ommatidial cell death (**Fig.**  
335 **5A**). Furthermore, we found an enhanced disruption of ommatidial cell organization and loss

336 of photoreceptors in pupal flies with concomitant knockdown of *Cbp20* with *dlg1*, *Fsn* or  
337 *CG8888*, emphasizing the role of these genes in maintaining cell count and organization (**Fig.**  
338 **5B-C, S9 Fig., S8 Table**). Based on these observations, we next assayed for apoptotic cells in  
339 the larval eye discs of flies with knockdown of *Cbp20* and other homologs of 3q29 genes. We  
340 observed significant increases in the number of apoptotic cells, as measured by *dcp1* (**Fig.**  
341 **5D-E**) and TUNEL staining (**S9 Fig.**), when *Cbp20* was knocked down along with *CG8888*,  
342 *dlg1*, or *Fsn*. *Cbp20/CG8888* knockdown flies also showed a decreased number of pH3-  
343 positive cells, suggesting that both apoptosis and proliferation are affected by the interaction  
344 between these two genes (**Fig. 5F**).

345 To validate apoptosis as a candidate mechanism for the cellular defects of flies with  
346 knockdown of homologs of 3q29 genes, we crossed recombined fly lines for *Cbp20* and *dlg1*  
347 with flies overexpressing *Diap1* (death-associated inhibitor of apoptosis). *Diap1* is an E3  
348 ubiquitin ligase that targets *Dronc*, the fly homolog of caspase-9, and prevents the subsequent  
349 activation of downstream caspases that lead to apoptosis [63]. We found that overexpression  
350 of *Diap1* rescued the adult rough eye phenotypes (**Fig. 6A-B, S10 Fig.**) and increased the eye  
351 sizes of *Cbp20* and *dlg1* flies (**S10 Fig.**). These observations were corroborated by the  
352 reversal of cellular changes in the eye upon *Diap1* overexpression, including the rescue of  
353 ommatidial structure and cell count deficits observed with knockdown of *Cbp20* and *dlg1*  
354 (**Fig. 6D, S10 Fig.**). Furthermore, overexpression of *Diap1* led to significant reductions in the  
355 number of TUNEL and *dcp1*-positive cells in the larval eye discs of flies with knockdown of  
356 *Cbp20* and *dlg1*, confirming the rescue of apoptosis defects in these flies (**Fig. 6E-F, S10**  
357 **Fig.**). Interestingly, *Diap1* overexpression also suppressed the photoreceptor axon targeting  
358 defects observed with knockdown of *Cbp20* (**Fig. 6G, S4 Table**), suggesting that the  
359 neuronal defects observed in these flies could be attributed to increased apoptosis. We further  
360 confirmed these mechanistic findings by observing increased severity in cellular phenotypes  
361 upon overexpression of *Dronc* in *Cbp20* and *dlg1* knockdown flies. For example, we  
362 observed black necrotic patches (**Figs. 6A and 6C**) and exaggerated apoptotic responses (**Fig.**  
363 **6E-F, S10 Fig.**) in *Cbp20* knockdown flies with overexpression of *Dronc*. These results  
364 suggest that apoptosis mediates the cellular defects observed in flies with knockdown of  
365 *Cbp20* and *dlg1*.

366

### 367 **Homologs of 3q29 genes interact with canonical neurodevelopmental genes**

368 We further explored the role of 3q29 genes in neurodevelopmental pathways by screening  
369 four fly homologs with strong neurodevelopmental phenotypes (*Cbp20*, *dlg1*, *CG8888*, and

370 *Pak*) for interactions with homologs of 15 known human neurodevelopmental genes, for a  
371 total of 60 pairwise interactions and 153 two-hit crosses (**Fig. 7A**). We selected these  
372 neurodevelopmental genes for screening based on their association with developmental  
373 disorders in humans [53,64], and included eight genes associated with apoptosis or cell cycle  
374 functions as well as four genes associated with microcephaly [65], a key phenotype observed  
375 in approximately 50% of 3q29 deletion carriers [8]. We found that 34 pairwise interactions,  
376 validated with a second line when available, led to significant increases in eye phenotypes  
377 compared with recombined lines for individual homologs of 3q29 genes (**S9 Table, S11**  
378 **Fig.**). These interactions included 19 validated interactions of homologs of 3q29 genes with  
379 apoptosis or cell cycle genes as well as ten interactions with microcephaly genes. We found  
380 that 13/15 homologs of neurodevelopmental genes, including all four microcephaly genes,  
381 enhanced the phenotypes observed with knockdown of *Cbp20* alone. Furthermore,  
382 knockdown of *dlg1* significantly enhanced the ommatidial necrotic patches observed with  
383 knockdown of *arm* (*CTNNB1*), while flies with concomitant knockdown of *Cbp20* and *arm*  
384 also showed increased necrotic patches (**Fig. 7B, S9 Fig.**). Interestingly, we also found that  
385 knockdown of *CG8888* and *dlg1* suppressed the rough eye phenotypes observed with  
386 knockdown of *Prosap* (*SHANK3*), while knockdown of *Pak* suppressed the phenotypes of  
387 both *Prosap* and *Pten* (*PTEN*) knockdown flies (**Fig. 7B**). Several of these interactions have  
388 been previously observed to modulate neuronal function in model systems. For example,  
389 *SHANK3* interacts with *DLGI* through the mediator protein DLGAP1 to influence post-  
390 synaptic density in mice [66] and binds to proteins in the Rac1 complex, including PAK2, to  
391 regulate synaptic structure [67,68]. These results suggest that homologs of 3q29 genes  
392 interact with key developmental genes in conserved pathways to modify cellular phenotypes.

393

#### 394 **Reduction of 3q29 gene expression causes developmental defects in *Xenopus laevis***

395 After identifying a wide range of neurodevelopmental defects due to knockdown of fly  
396 homologs of 3q29 genes, we sought to gain further insight into the conserved functions of  
397 these genes in vertebrate embryonic brain development using the *Xenopus laevis* model  
398 system. We examined the effect of targeted knockdown of *ncbp2*, *fbxo45*, and *pak2*, as  
399 homologs of these genes displayed multiple severe phenotypes with reduced gene expression  
400 in flies. Knockdown of *X. laevis* homologs for each 3q29 gene was accomplished using  
401 antisense morpholino oligonucleotides (MOs) targeted to early splice sites of each homolog  
402 (**Fig. 1**). *X. laevis* embryos were injected at either the two- or four-cell stage with various  
403 concentrations of MO for each homolog or a standard control, and knockdown of each

404 homolog was validated using qPCR (**S12 Fig.**). As knockdown of *Cbp20*, *Fsn*, and *Pak* each  
405 resulted in neuronal defects in *Drosophila*, we first examined the effects of knockdown of  
406 these homologs on *X. laevis* brain development at stage 47. To test this, we knocked down  
407 each gene in half of the embryo at the two-cell stage, and left the other half uninjected to  
408 create a side-by-side comparison of brain morphology (**Fig. 8A**). We performed whole-mount  
409 immunostaining with anti-alpha tubulin and found that reduced expression of *ncbp2*, *fbxo45*,  
410 and *pak2* each resulted in smaller forebrain and midbrain size compared with controls (**Fig.**  
411 **8A-C**). We also found that simultaneous knockdown of *ncbp2* with *fbxo45* caused a  
412 significant decrease in forebrain size and a trend towards decreased midbrain size ( $p=0.093$ )  
413 compared with *ncbp2* knockdown (**Fig. 8A-C**). Knockdown of *pak2* with *ncbp2* showed a  
414 similar trend towards decreased forebrain size ( $p=0.051$ ). Interestingly, the reduced brain  
415 volumes we observed with knockdown of homologs of 3q29 genes in *X. laevis* recapitulate  
416 the reduced brain volume observed in 3q29 deletion mice [14,15], suggesting that multiple  
417 genes in the 3q29 region contribute to this phenotype. We further examined the effect of  
418 knocking down homologs of 3q29 genes on *X. laevis* eye development at stage 42, and found  
419 that knockdown of these homologs caused irregular shapes and decreased size compared with  
420 controls (**S13 Fig.**). The reductions in eye size were rescued to control levels when mRNA  
421 was co-injected along with MO for each homolog (**S13 Fig.**). Together, these data show that  
422 individual and pairwise knockdown of homologs of 3q29 genes in *X. laevis* leads to abnormal  
423 brain and eye morphology, confirming the conserved role of these genes during vertebrate  
424 development.

425 To determine if the knockdown of homologs of 3q29 genes also disrupted apoptotic  
426 processes in *X. laevis*, we tested whether overexpression of the X-linked inhibitor of  
427 apoptosis gene (*xiap*) could rescue the observed developmental defects. We found that  
428 overexpression of *xiap* rescued the midbrain and forebrain size deficits observed with *ncbp2*  
429 knockdown to control levels (**Fig. 8A-C**). Similarly, we found that the decreased eye sizes  
430 and morphological defects observed with knockdown of *ncbp2* were rescued with *xiap*  
431 overexpression (**S13 Fig.**). To further validate these findings, we performed a western blot  
432 following knockdown of *fbxo45* and *ncbp2* using anti-cleaved caspase-3 (Asp175) as a  
433 marker for apoptosis (**Fig. 8D, S12 Fig.**). We found that reduction of *fbxo45* and *ncbp2*  
434 expression each led to an increase in cleaved caspase-3 levels compared with controls, which  
435 were restored to control levels with concomitant overexpression of *xiap* (**Fig. 8E**). Caspase-3  
436 levels were also enhanced when *fbxo45* and *ncbp2* were knocked down together (**Fig. 8E**),  
437 suggesting that these two homologs interact with each other and contribute towards

438 developmental phenotypes through increased apoptosis. Overall, these results suggest  
439 involvement of apoptotic processes towards the developmental phenotypes observed with  
440 knockdown of homologs of 3q29 genes in a vertebrate model (**Table 1**).  
441

## 442 DISCUSSION

443 Using complementary *Drosophila* and *X. laevis* models, we interrogated developmental  
444 effects, cellular mechanisms, and genetic interactions of individual homologs of genes within  
445 the 3q29 region. Our major findings were recapitulated across both model systems (**Table 1**)  
446 and could also potentially account for the developmental phenotypes reported in mouse  
447 models of the entire deletion. Several themes have emerged from our study that exemplify the  
448 genetic and mechanistic complexity of the 3q29 deletion region.

449 *First*, our analysis of developmental phenotypes with knockdown of homologs for  
450 individual 3q29 genes showed that a single gene within the region may not be solely  
451 responsible for the effects of the deletion. In fact, we found that knockdown of 12 out of 14  
452 fly homologs showed developmental defects in *Drosophila*, while every fly homolog showed  
453 an enhanced rough eye phenotype when knocked down along with at least one other homolog  
454 (**Fig. 2**). Although our study is limited to examining conserved cellular phenotypes of  
455 homologs of 3q29 genes in *Drosophila* and *X. laevis*, evidence from other model organisms  
456 also supports an oligogenic model for the deletion. In fact, knockout mouse models for  
457 several 3q29 genes have been reported to exhibit severe developmental phenotypes, including  
458 axonal and synaptic defects in *Fbxo45*<sup>-/-</sup> and embryonic lethality in *Pak2*<sup>-/-</sup> and *Pcyt1a*<sup>-/-</sup>  
459 knockout mice [69–71] (**S3 Table**). Notably, although *Dlg1*<sup>+/-</sup> or *Pak2*<sup>+/-</sup> mice showed a  
460 range of neuronal phenotypes compared with control mice, they did not recapitulate the major  
461 developmental and behavioral features observed in mouse models of the entire deletion  
462 [14,15,72], suggesting that the deletion phenotypes are contingent upon haploinsufficiency of  
463 multiple genes in the region (**S10 Table**). Furthermore, several 3q29 genes including *PAK2*,  
464 *DLG1*, *PCYT1A*, and *UBXN7* are under evolutionary constraint in humans, based on gene  
465 pathogenicity metrics (**S1 File**). Two genes in the 3q29 region without fly homologs, *CEP19*  
466 and *TFRC*, are also under evolutionary constraint in humans, with *TFRC* having been  
467 implicated in neural tube defects and embryonic lethality in mouse models [73]. While no  
468 common variants associated with neurodevelopmental traits have been observed in the 3q29  
469 region [74], rare variants of varying effects in 9/21 genes have been identified among patients  
470 with different developmental disorders [75–77] (**S1 File**). These data, combined with our  
471 findings in *Drosophila* and *X. laevis*, implicate multiple genes within the 3q29 region as  
472 potential candidates for neurodevelopmental defects.

473 *Second*, our screening of 161 crosses between pairs of fly homologs of 3q29 genes  
474 identified 44 interactions that showed enhanced rough eye phenotypes, suggesting that  
475 complex interactions among genes in the 3q29 region could contribute towards



476 developmental defects (**Fig. 9A**). While we only tested a subset of all possible interactions  
477 among the non-syntenic homologs of 3q29 genes in *Drosophila*, our results highlight  
478 conserved mechanistic relationships between “parts”, or the individual genes, towards  
479 understanding the effects of the “whole” deletion. For example, knockdown of *Cbp20*  
480 enhanced the phenotypes of 11 out of 12 other fly homologs, suggesting that *NCBP2* could be  
481 a key modulator of other genes within the region. *NCBP2* encodes a subunit of the nuclear  
482 cap-binding complex (CBC), which binds to the 5’ end of mRNA and microRNA in the  
483 nucleus [78]. Given the role of the CBC in post-transcriptional regulatory mechanisms such  
484 as nonsense-mediated decay, alternative splicing and mRNA transport [79,80], it is possible  
485 that disruption of this complex could result in changes to a broad set of genes and biological  
486 processes. In fact, our analysis of differentially-expressed genes in *Cbp20* knockdown flies  
487 showed disruption of synaptic transmission, cellular respiration, and several metabolic  
488 pathways. In contrast to other proposed candidate genes in the 3q29 region, *NCBP2* is not  
489 predicted to be pathogenic on its own in humans (**S1 File**) and does not have identified  
490 deleterious mutations in sequencing studies of neurodevelopmental disease cohorts so far,  
491 indicating its potential role as a modifier of the other candidate genes in the region (**Fig. 9B**).  
492 Our results also complement previous reports of synergistic interactions among fly homologs  
493 of 3q29 genes in the nervous system [54], representing another hallmark of an oligogenic  
494 model for the deletion. As these genetic interactions may vary across different species,  
495 developmental timepoints, and tissues, the role of these interactions should be more deeply  
496 explored using mouse and human cell culture models.

497 *Third*, we identified disruptions to several cellular processes due to both single and  
498 pairwise knockdown of homologs in *Drosophila* and *X. laevis* models (**Table 1**). For  
499 example, simultaneous knockdown of homologs of *NCBP2* and *FBXO45* in *Drosophila* led to  
500 enhanced cellular disorganization (**Fig. 5**) and altered expression of cell cycle and apoptosis  
501 genes (**S8 Figure**), as well as enhanced morphological defects and increased caspase-3 levels  
502 in *X. laevis* (**Fig. 8**). We further found that overexpression of the apoptosis inhibitors *Diap1*  
503 and *xiap* rescued the cellular and neuronal phenotypes observed with knockdown of  
504 homologs of 3q29 genes (**Fig. 6**), providing important validations for the potential  
505 involvement of apoptosis in the deletion (**Table 1**). We propose that *NCBP2* could modify  
506 several cellular and molecular processes that may not be directly related to apoptosis, but  
507 could instead lead to a cascade of biological events that ultimately result in apoptosis (**Fig.**  
508 **9B**). Apoptosis mechanisms are well-conserved between *Drosophila*, *X. laevis*, and humans,  
509 with key genes such as *XIAP* (*Diap1*), *CASP2* (*Dronc*), *CASP3* (*DrICE*), and *CASP7* (*Dcp-1*)

510 sharing the same roles in programmed cell death across the three organisms [81–83]. In fact,  
511 we found that fly homologs of human genes annotated for apoptosis function in the Gene  
512 Ontology database were also enriched for apoptosis function (n=1,063 fly homologs from  
513 1,789 human apoptosis genes;  $p=5.30 \times 10^{-13}$ , Fisher's Exact test with Benjamini-Hochberg  
514 correction). Although we focused on testing apoptosis phenotypes with knockdown of  
515 homologs of 3q29 genes, we note that apoptosis is potentially one of many cellular pathways  
516 disrupted by the 3q29 deletion (**Fig. 9B**). In fact, our data implicated knockdown of several  
517 homologs of 3q29 genes, including *dlg1* and *CG8888* (*BDHI*), towards abnormal cell  
518 proliferation during development. Furthermore, several 3q29 genes have been previously  
519 associated with apoptosis or cell cycle regulation functions (**S1 File**). For example, *DLG1* is a  
520 tumor suppressor gene whose knockdown in *Drosophila* leads to neoplasms in the developing  
521 brain and eye disc [84,85], while *PAK2* is a key downstream mediator of the ERK signaling  
522 pathway for neuronal extension and is activated by caspases during apoptosis [70,86,87]. Our  
523 results recapitulate the role of *DLG1* towards cell cycle regulation, and also implicate *NCBP2*  
524 and its interactions towards multiple cellular and developmental phenotypes.

525 More broadly, genes involved with apoptosis and cell proliferation have been  
526 implicated in several neurodevelopmental disorders. For example, we previously observed  
527 disrupted cell proliferation upon knockdown of *Drosophila* homologs of genes in the 16p11.2  
528 deletion region, as well as an enrichment of cell cycle function among connector genes  
529 between pairs of 16p11.2 genes in a human brain-specific network [21]. Furthermore,  
530 abnormal apoptosis in the early developing brain has been suggested as a possible mechanism  
531 for the decreased number of neurons observed in individuals with autism and schizophrenia  
532 [62,88,89]. For example, increased apoptosis was observed in both postmortem brain tissue  
533 from autism patients [90] and primary fibroblasts from schizophrenia patients [91,92]. We  
534 found further support for the role of apoptosis in these disorders by identifying significant  
535 enrichments for genes associated with apoptotic processes among candidate genes for autism  
536 (empirical  $p < 1.00 \times 10^{-5}$ ) [77], intellectual disability ( $p < 1.00 \times 10^{-5}$ ) [93], and schizophrenia  
537 ( $p = 0.014$ ) [76] (**S11 Table**). In fact, out of the 525 neurodevelopmental genes involved in  
538 apoptosis, 20 genes were present within pathogenic CNV regions [94], including *CORO1A*,  
539 *MAPK3* and *TAOK2* in the 16p11.2 region as well as *TBX1*, the causative gene for heart  
540 defects in DiGeorge/velocardiofacial syndrome [95] (**S4 File**). In addition to neuropsychiatric  
541 disorders, apoptosis has also been implicated in syndromic forms of microcephaly in humans  
542 [96] as well as decreased brain size in animal models of microcephaly genes [97,98]. For  
543 example, a mouse model of the Nijmegen breakage syndrome gene *NBN* exhibited increased

544 neuronal apoptosis, leading to microcephaly and decreased body mass [99]. Overall, these  
545 findings highlight the importance of cell cycle-related processes, particularly apoptosis and  
546 proliferation, towards modulating neuronal phenotypes that could be responsible for  
547 developmental disorders.

548         In this study, the use of *Drosophila* and *X. laevis* models, both of which are amenable  
549 to high-throughput screening of developmental phenotypes, allowed us to systematically  
550 examine the conserved cellular and mechanistic roles of homologs of 3q29 genes and their  
551 interactions. Follow-up studies in more evolutionarily advanced systems, such as mouse or  
552 human cell lines, will be useful to overcome limitations of *Drosophila* and *X. laevis* models,  
553 including testing the neurodevelopmental phenotypes and interactions of 3q29 genes without  
554 fly homologs. Collectively, these results emphasize the utility of quantitative functional  
555 assays for identifying conserved pathways associated with neurodevelopmental disorders,  
556 which will hopefully allow for future discoveries of treatments for these disorders.

557

## 558 MATERIALS AND METHODS

### 559 Fly stocks and genetics

560 Using reciprocal BLAST searches and orthology predictions from the *DIOPT* v.7.1 database  
561 [100], we identified 15 fly homologs for the 21 human genes within the chromosome 3q29  
562 region (**S1 Table**). No fly homologs were present for six genes, including *LRRC33*, *CEP19*,  
563 *RNF168*, *SMCO1*, *TFRC*, and *TM4SF19*. We used a similar strategy to identify homologs for  
564 other neurodevelopmental genes tested for interactions in this study. Gene Ontology-Slim  
565 (GO-Slim) terms for each human gene and fly homolog were obtained from PantherDB [101]  
566 and are provided in **S1 File**. RNAi lines for fly homologs were obtained from the Vienna  
567 *Drosophila* Resource Centre [102] (VDRC), including both KK and GD lines, and the  
568 Bloomington *Drosophila* Stock Center (BDSC) (NIH P40OD018537). A list of fly RNAi  
569 lines used in this study is provided in **S2 File**. Fly RNAi lines for homologs of 3q29 genes  
570 were tested for gene knockdown using quantitative PCR (**S1 Table**). As the available KK line  
571 for CG5359 (*TCTEXID2*) showed a wing phenotype consistent with *tiptop* overexpression  
572 due to RNAi insertion at the 5'UTR of the gene [103], which we confirmed using qPCR  
573 analysis (**S5 File**), we excluded this gene from our experiments. Microarray data and  
574 modENCODE Anatomy RNA-Seq from FlyBase [104,105] showed that all of the 14 tested  
575 homologs were expressed in the fly central nervous system and eye tissues (**S1 Table**).

576 All fly stocks and crosses were cultured on conventional cornmeal-sucrose-dextrose-  
577 yeast medium at 25°C, unless otherwise indicated. RNAi lines were crossed with a series of  
578 *GAL4* driver lines to achieve tissue-specific knockdown of genes, including *w<sup>1118</sup>;da-GAL4*  
579 (Scott Selleck, Penn State) for ubiquitous, *w<sup>1118</sup>;dCad-GFP*, *GMR-GAL4/CyO* (Zhi-Chun Lai,  
580 Penn State) and *w<sup>1118</sup>;GMR-GAL4;UAS-Dicer2* (Claire Thomas, Penn State) for eye-specific,  
581 *w<sup>1118</sup>,bx<sup>MS1096</sup>-GAL4;;UAS-Dicer2* (Zhi-Chun Lai, Penn State) for wing-specific, and  
582 *w<sup>1118</sup>,Elav-GAL4* (Mike Grotewil, VCU) and *w<sup>1118</sup>,Elav-GAL4;;UAS-Dicer2* (Scott Selleck,  
583 Penn State) for pan-neuronal knockdown of gene expression. A list of full genotypes for all  
584 crosses tested in this study is provided in **S2 File**. To perform interaction studies, we  
585 generated recombined stock lines of *GMR-GAL4* with reduced expression of nine select  
586 homologs of 3q29 genes (**S2 File**). Females from these stocks with constitutively reduced  
587 gene expression for each of these genes were crossed with RNAi lines of other homologs to  
588 achieve simultaneous knockdown of two genes (**Fig. 1**). We previously demonstrated that  
589 these two-hit crosses had adequate *GAL4* to bind to two independent *UAS-RNAi* constructs  
590 [21].

591

## 592 **Quantitative polymerase chain reaction for *Drosophila* RNAi knockdowns**

593 Levels of gene expression knockdown were confirmed using quantitative reverse-  
594 transcriptase PCR (qPCR) on RNA isolated from pooled groups of 35 fly heads per line  
595 tested (**S2 Table**). Briefly, RNAi lines were crossed with *Elav-GAL4* (to test RNAi line  
596 efficacy) or *Elav-GAL4;;UAS-Dicer2* (to test for *tiptop* overexpression) at 25°C to achieve  
597 pan-neuronal knockdown of the fly homolog. Adult fly heads at day 3 were separated by  
598 vortexing, and total RNA was isolated using TRIzol (Invitrogen, Carlsbad, CA, USA). cDNA  
599 was prepared using the qScript cDNA synthesis kit (Quantabio, Beverly, MA, USA).  
600 Quantitative PCR was performed using an Applied Biosystems Fast 7500 system with SYBR  
601 Green PCR master mix (Quantabio) to estimate the level of gene expression. All experiments  
602 were performed using three biological replicates of 35 fly heads each. Primers were designed  
603 using NCBI Primer-BLAST [106], with primer pairs separated by an intron in the  
604 corresponding genomic DNA. A list of primers used in the experiments is provided in **S2**  
605 **Table**. The delta-delta Ct value method was used to obtain the relative expression of fly  
606 homologs in the RNAi lines compared with *Elav-GAL4* controls [107].

607

## 608 **Climbing assay**

609 We set up fly crosses at 25°C with *Elav-GAL4* to obtain pan-neuronal knockdown for select  
610 homologs of 3q29 genes. For each RNAi line tested, groups of ten female flies were first  
611 allowed to adjust at room temperature for 30 minutes and then transferred to a climbing  
612 apparatus, made by joining two vials, and allowed to adjust for 5 minutes. The flies were  
613 tapped down to the bottom, and the number of flies climbing past the 8 cm mark measured  
614 from the bottom of the apparatus in 10 seconds was then counted (**S1 Video, S2 Video**). This  
615 assay was repeated nine additional times for each group, with a one-minute rest between  
616 trials. The sets of 10 trials for each group were repeated daily for ten days, capturing data for  
617 100 replicates from day 1 until day 10, starting the experiments with 1-2-day old flies. All  
618 experiments were performed during the same time of the day for consistency of results.

619

## 620 **Imaging of adult fly eyes and wings**

621 We crossed RNAi lines with *GMR-GAL4* and reared at 29°C for eye-specific knockdown and  
622 *bx<sup>MS1096</sup>-GAL4* at 25°C for wing-specific knockdown. For eye imaging, adult 2-3-day old  
623 female progenies from the crosses were collected, immobilized by freezing at -80°C,  
624 mounted on Blu-tac (Bostik Inc, Wauwatosa, WI, USA), and imaged with an Olympus BX53  
625 compound microscope with LMPLan N 20X air objective using a DP73 c-mount camera at

626 0.5X magnification and a z-step size of 12.1 $\mu$ m. (Olympus Corporation, Tokyo, Japan). We  
627 used CellSens Dimension software (Olympus Corporation, Tokyo, Japan) to capture the  
628 images, and stacked the image slices using Zerene Stacker (Zerene Systems LLC, Richland,  
629 WA, USA). All eye images presented in this study are maximum projections of 20  
630 consecutive optical z-sections. Adult wings were plucked from 2-5 day old female flies,  
631 mounted on a glass slide, covered with a coverslip and sealed with clear nail polish. The  
632 wings were imaged using a Zeiss Discovery V20 stereoscope (Zeiss, Thornwood, NY, USA)  
633 with ProgRes Speed XT Core 3 camera (Jenoptik AG, Jena, Germany) using a 40X objective,  
634 and wing images were captured with ProgRes CapturePro v.2.8.8.

635

### 636 **Quantitative phenotyping of fly eyes using *Flynotyper***

637 We used a computational method called *Flynotyper* (<https://flynotyper.sourceforge.net>) to  
638 measure the degree of roughness of the adult eyes with knockdown of individual or pairs of  
639 homologs [53]. The software uses an algorithm to detect the center of each ommatidium, and  
640 calculates a phenotypic score based on the number of ommatidia detected, the lengths of six  
641 local vectors with direction pointing from each ommatidium to the neighboring ommatidia,  
642 and the angle between these six local vectors (**S2 Fig**). Eye areas, ommatidial diameter, and  
643 areas of necrotic patches, which may not be reflected in the *Flynotyper* scores, were  
644 measured using ImageJ [108]. Significant pairwise interactions were reported as “validated”  
645 when multiple RNAi or mutant lines, if available, showed the same phenotype (**S7 Table, S9**  
646 **Table**).

647

### 648 **Immunohistochemistry of eye and wing discs**

649 Third instar larval and 44-hour-old pupal eye discs, reared at 29°C, and third instar larval  
650 wing discs, reared at 25°C, were dissected in 1X phosphate-buffered saline (PBS) and fixed  
651 in 4% paraformaldehyde for 20 minutes. The eye and wing discs were then washed thrice in  
652 PBT (PBS with 0.1% Triton-X) for 10 minutes each, treated with blocking solution (PBS  
653 with 1% normal goat serum (NGS) for eye discs, or 1% bovine serum albumin (BSA) for  
654 wing discs) for 30 minutes, and then incubated overnight with primary antibodies at 4°C.  
655 Rabbit anti-cleaved *Drosophila* dcp1 (Asp216) (1:100; 9578S, Cell Signaling Technology,  
656 Danvers, MA, USA), a marker for cells undergoing apoptosis, and Mouse anti-phospho-  
657 Histone H3 (S10) antibody (1:100; 9706L, Cell Signaling Technology), a mitotic marker for  
658 measuring proliferating cells, were used to assay cell proliferation and apoptosis defects in  
659 larval eye and wing discs. Mouse anti-DLG (1:200; 4F3, DSHB, Iowa City, Iowa, USA), a

660 septate junction marker, and Rhodamine Phalloidin (1:200; R415, Invitrogen Molecular  
661 Probes, Carlsbad, CA, USA), an F-actin marker, were used to visualize and count ommatidial  
662 cells and photoreceptor cells in pupal eyes. Mouse anti-chaoptin (1:200; 24B10, DSHB) was  
663 used to visualize retinal axon projections. Preparations were then washed thrice with PBT for  
664 10 minutes, and incubated for two hours with fluorophore-conjugated secondary antibodies  
665 (Alexa fluor 568 goat anti-mouse (1:200) (A11031), Alexa fluor 488 goat anti-mouse (1:200)  
666 (A11029), Alexa fluor 647 goat anti-rabbit (1:200) (A21245), and Alexa fluor 647 goat anti-  
667 mouse (1:200) (A21236), Invitrogen Molecular Probes, Carlsbad, CA, USA)) with gentle  
668 shaking. Preparations were washed thrice in PBT for 10 minutes, and the tissues were then  
669 mounted in Prolong Gold antifade mounting media with DAPI (P36930, Thermo Fisher  
670 Scientific, Waltham, MA, USA) or Vectashield hard set mounting media with DAPI (H-  
671 1500, Vector Laboratories, Burlingame, CA, USA) for imaging.

672

### 673 **Bromouridine staining**

674 Third instar larval eye discs were dissected in 1X PBS and immediately transferred to  
675 Schneider's Insect Media (Sigma-Aldrich, St. Louis, MO). The tissues were then incubated in  
676 10  $\mu$ M BrdU (Sigma-Aldrich) at 25°C for one hour with constant agitation to allow for  
677 incorporation of BrdU into DNA of replicating cells during the S-phase of cell cycle. The  
678 samples were washed thrice with PBS for five minutes each and fixed in 4%  
679 paraformaldehyde for 20 minutes. To denature DNA, the tissues were acid-treated in 2N HCl  
680 for 20 minutes, neutralized in 100 mM Borax solution for 2 minutes, washed thrice in 10X  
681 PBT (PBS with 0.1% Tween-20) for 10 minutes, and treated with blocking solution (PBS,  
682 0.2% Triton X-100, 5% NGS) for one hour. The tissues were then incubated in mouse anti-  
683 BrdU (1:200; G3G4, DSHB, Iowa City, Iowa, USA) and diluted in blocking solution  
684 overnight at 4°C. The next day, the tissues were washed thrice in PBT for 20 minutes each  
685 and incubated in Alexa fluor 568 goat anti-mouse (1:200, Invitrogen Molecular Probes,  
686 Carlsbad, CA, USA) for two hours with constant agitation. Finally, the samples were  
687 mounted in Prolong Gold antifade reagent with DAPI (Thermo Fisher Scientific, Waltham,  
688 MA, USA) for imaging.

689

### 690 **Terminal deoxynucleotidyl transferase (TUNEL) Assay**

691 The levels of cell death in the developing eye were evaluated by staining using the *In Situ*  
692 Cell Death Detection Kit, TMR Red (Roche, Basel, Switzerland). The third instar larval eye  
693 discs were dissected in 1X PBS and fixed in 4% paraformaldehyde for 20 minutes at room

694 temperature, followed by three 10-minute washes with PBS. The dissected tissues were  
695 permeabilized by treating with 20  $\mu\text{g/ml}$  proteinase K (Sigma-Aldrich, St. Louis, MO, USA)  
696 for two minutes, washed thrice in PBT (PBS with 0.1% Triton-X) for 5 minutes each, fixed in  
697 4% paraformaldehyde for 15 minutes, and washed thrice again in PBT for 10 minutes each.  
698 The tissues were then incubated overnight with TUNEL (terminal deoxynucleotidyl  
699 transferase dUTP nick end labeling) reaction mixture at 4°C per the manufacturer’s  
700 instructions, and washed five times in PBT for 15 minutes each. Finally, tissues were  
701 mounted in Prolong-gold antifade containing DAPI (Thermo Fisher Scientific, Waltham,  
702 MA, USA) for imaging.

703

### 704 **Confocal imaging and analysis**

705 Confocal images of larval and pupal eye discs were captured using an Olympus Fluoview  
706 FV1000 laser scanning confocal microscope (Olympus America, Lake Success,  
707 NY). Maximum projections of all optical sections were generated for display. As DLG  
708 staining was only used to visualize cell boundaries in the pupal eye and not for any  
709 expression or quantitative analysis, we increased the laser intensity from 400-490V in  
710 control flies to 530-570V in flies with knockdown of *dlg1* to account for decreased DLG  
711 expression. Acquisition and processing of images was performed using the Fluoview  
712 FV10-ASW 2.1 software (Olympus Corporation, Tokyo, Japan), and the z-stacks of images  
713 were merged using ImageJ [108]. The number of pH3, BrdU, TUNEL, and *dcp1*-positive  
714 cells from larval eye discs were counted using two ImageJ plugins, AnalyzeParticles and  
715 Image-based Tool for Counting Nuclei (ITCN). As we found a strong correlation (Pearson  
716 correlation,  $r=0.736$ ,  $p<2.2\times 10^{-16}$ ) between the two methods (**S2 Fig.**), all cell counts  
717 displayed for eye data were derived from ITCN analysis. Proliferating cells in larval wing  
718 discs stained with pH3 were counted using AnalyzeParticles, and apoptotic cells in wing  
719 discs stained with *dcp1* were analyzed using manual counting. Images stained with anti-  
720 chaoptin were manually scored as having either “mild” (minor axon disorganization  
721 compared with control), “moderate” (partial loss of axon projection. i.e. loss of R7-R8  
722 projection into the medulla), or “severe” (loss of projections for most axons at the lamina)  
723 axon targeting defects.

724

### 725 **Differential expression analysis of transcriptome data**

726 We performed RNA sequencing (RNA-Seq) of samples isolated from three biological  
727 replicates of 35 fly heads each for individual (*Cbp20*, *dlg1*, *Fsn*, *Pak*) and pairwise



728 (*Cbp20/dlg1*, *Cbp20/Fsn*) *Elav-GAL4* mediated knockdowns of homologs of 3q29 genes. We  
729 compared gene expression levels of each cross to VDRC control flies carrying the same  
730 genetic background (GD or KK control lines crossed with *Elav-GAL4*). We prepared cDNA  
731 libraries for the three biological replicates per genotype using TruSeq Stranded mRNA LT  
732 Sample Prep Kit (Illumina, San Diego, CA), and performed single-end sequencing using  
733 Illumina HiSeq 2000 at the Penn State Genomics Core Facility to obtain 100 bp reads at an  
734 average coverage of 36.0 million aligned reads/sample. We used Trimmomatic v.0.36 [109]  
735 for quality control assessment, TopHat2 v.2.1.1 [110] to align the raw sequencing data to the  
736 reference fly genome and transcriptome (build 6.08), and HTSeq-Count v.0.6.1 [111] to  
737 calculate raw read counts for each gene. edgeR v.3.20.1 [112] (generalized linear model  
738 option) was used to perform differential expression analysis, and genes with log<sub>2</sub>-fold  
739 changes >1 or <-1 and false-discovery rates <0.05 (Benjamini-Hochberg correction) were  
740 considered to be differentially expressed (**S3 File**). Human homologs of differentially-  
741 expressed fly genes (top matches for each fly gene, excluding matches with “low” rank) were  
742 identified using DIOPT [100]. Enrichment analysis of Panther GO-Slim Biological Process  
743 terms among the differentially-expressed fly genes and their human homologs was performed  
744 using the PantherDB Gene List Analysis tool [101]. Enrichments for genes preferentially  
745 expressed in the developing brain were calculated using the Cell-type Specific Expression  
746 Analysis tool [113] based on expression data from the BrainSpan Atlas [114].

747

#### 748 ***X. laevis* embryos**

749 Eggs collected from female *X. laevis* frogs were fertilized *in vitro*, dejellied, and cultured  
750 following standard methods [115,116]. Embryos were staged according to Nieuwkoop and  
751 Faber [117]. All *X. laevis* experiments were approved by the Boston College Institutional  
752 Animal Care and Use Committee (Protocol #2016-012) and were performed according to  
753 national regulatory standards.

754

#### 755 **Morpholino and RNA constructs**

756 Morpholinos (MOs) were targeted to early splice sites of *X. laevis* *ncbp2*, *fbxo45*, *pak2*, or  
757 standard control MO, purchased from Gene Tools LLC (Philomath, OR, USA). MO  
758 sequences are listed in **S12 Table**. For knockdown experiments, all MOs were injected at  
759 either the 2-cell or 4-cell stage, with embryos receiving injections two or four times total in  
760 0.1X MMR media containing 5% Ficoll. Control and *fbxo45* MOs were injected at  
761 10ng/embryo, *ncbp2* and control MOs were injected at 20ng/embryo, and *pak2* and control

762 MOs were injected at 50ng/embryo. For rescue experiments (**S13 Fig.**), the same amounts of  
763 MOs used in the KD experiments were injected along with gene-specific mRNA tagged with  
764 GFP (800pg/embryo for *xiap*-GFP; 1000pg/embryo for *ncbp2*-GFP and *fbxo45*-GFP, and  
765 300pg/embryo for *pak2*-GFP) in the same injection solution. Capped mRNAs were  
766 transcribed *in vitro* using SP6 or T7 mMessage mMachine Kit (Thermo Fisher Scientific,  
767 Waltham, MA, USA). RNA was purified with LiCl precipitation. *X. laevis ncbp2*, *fbxo45*,  
768 *pak2*, and *xiap* ORFs obtained from the European *Xenopus* Resource Center (EXRC,  
769 Portsmouth, UK) were gateway-cloned into pCSf107mT-GATEWAY-3'GFP destination  
770 vectors. Constructs used included *ncbp2*-GFP, *fbxo45*-GFP, *pak2*-GFP, *xiap*-GFP, and GFP  
771 in pCS2+. Embryos either at the 2-cell or 4-cell stage received four injections in 0.1X MMR  
772 containing 5% Ficoll with the following total mRNA amount per embryo: 300pg of GFP,  
773 800pg of *xiap*-GFP, 1000pg of *ncbp2*-GFP, 1000pg of *fbxo45*-GFP, and 300pg of *pak2*-GFP.  
774

#### 775 **qPCR for *X. laevis* morpholino knockdown**

776 Morpholino validation and knockdown was assessed using qPCR. Total RNA was extracted  
777 using TRIzol reagent (Life Technologies, Grand Island, NY, USA), followed by chloroform  
778 extraction and ethanol precipitation from 2-day old embryos injected with increasing  
779 concentrations of MO targeted to each homolog of the tested 3q29 gene. cDNA synthesis was  
780 performed with SuperScript II Reverse Transcriptase (Life Technologies, Grand Island, NY,  
781 USA) and random hexamers. PCR primers are listed in **S13 Table**. qPCR was performed in  
782 triplicate (**S12 Fig.**), with band intensities quantified by densitometry in ImageJ and  
783 normalized to the uninjected control mean relative to *ODCI*, which was used as a  
784 housekeeping control.

785

#### 786 **Brain and eye morphology assays**

787 In brain morphology experiments, all embryos received two injections at the 2-cell stage in  
788 0.1X MMR containing 5% Ficoll. One cell was left uninjected and the other cell was injected  
789 with either control MO or MO targeted to the tested 3q29 gene, along with 300pg of GFP  
790 mRNA in the same injection solution. Stage 47 tadpoles were fixed in 4% PFA diluted in  
791 PBS for one hour, rinsed in PBS and gutted to reduce autofluorescence. Embryos were  
792 incubated in 3% bovine serum albumin and 1% Triton-X 100 in PBS for two hours, and then  
793 incubated in anti-acetylated tubulin primary antibody (1:500, monoclonal, clone 6-11B-1,  
794 AB24610, Abcam, Cambridge, UK) and goat anti-mouse Alexa fluor 488 conjugate  
795 secondary antibody (1:1000, polyclonal, A11029, Invitrogen Life Technologies, Carlsbad,

796 CA). Embryos were then rinsed in 1% PBS-Tween and imaged in PBS. Skin dorsal to the  
797 brain was removed if the brain was not clearly visible due to pigment. For eye phenotype  
798 experiments, all embryos received four injections at the 2-cell or 4-cell stage in 0.1X MMR  
799 containing 5% Ficoll with either the control MO or MOs targeted to each 3q29 gene. Stage  
800 42 tadpoles were fixed in 4% PFA diluted in PBS. Tadpoles were washed three times in 1%  
801 PBS-Tween for one hour at room temperature before imaging.

802

### 803 ***X. laevis* image acquisition and analysis**

804 Lateral view images of stage 42 tadpoles for eye experiments and dorsal view images of stage  
805 47 tadpoles for brain experiments were each collected on a SteREO Discovery.V8  
806 microscope using a Zeiss 5X objective and AxioCam 512 color camera (Zeiss, Thornwood,  
807 NY, USA). Areas of the left and right eye, forebrain, and midbrain were determined from raw  
808 images using the polygon area function in ImageJ. Eye size was quantified by taking the  
809 average area of both the left and right eye, while forebrain and midbrain area were quantified  
810 by taking the ratio between the injected and uninjected sides for each sample.

811

### 812 **Western blot for apoptosis**

813 Two replicate western blot experiments were performed to test for apoptosis markers in *X.*  
814 *laevis* with 3q29 gene knockdown (**S12 Figure**). Embryos at stages 20-22 were lysed in  
815 buffer (50mM Tris pH 7.5, 1% NP40, 150mM NaCl, 1mM PMSF, 0.5 mM EDTA)  
816 supplemented with cOmplete Mini EDTA-free Protease Inhibitor Cocktail (Sigma-Aldrich,  
817 Basel, Switzerland). Blotting was carried out using rabbit polyclonal antibody to cleaved  
818 caspase-3 (1:500, 9661S, Cell Signaling Technology, Danvers, MA, USA), with mouse anti-  
819 beta actin (1:2500, AB8224, Abcam, Cambridge, UK) as a loading control on a Mini-  
820 PROTEAN TGX precast 4-15% gradient gel (Bio-Rad, Hercules, CA, USA).  
821 Chemiluminescence detection was performed using Amersham ECL western blot reagent  
822 (GE Healthcare Bio-Sciences, Pittsburgh, PA, USA). Band intensities were quantified by  
823 densitometry in ImageJ and normalized to the control mean relative to beta-actin. Due to the  
824 low number of replicates, we did not perform any statistical tests on data derived from these  
825 experiments.

826

### 827 **Human brain-specific network analysis of 3q29 gene interactions**

828 We used a human brain-specific gene interaction network that was previously built using a  
829 Bayesian classifier trained on gene co-expression datasets [56,57]. We extracted interactions

830 between pairs of genes with predicted weights  $>2.0$  (containing the top 0.5% most likely  
831 interactions) and measured the length of the shortest paths connecting pairs of 3q29 genes  
832 within the network, excluding genes without connectivity in the network from final  
833 calculations. As a control, we also measured the connectivity of 500 randomly selected genes  
834 with 100 replicates each of 20 other random genes. All network analysis was performed using  
835 the NetworkX Python package [118].

836

### 837 **Overlap between neurodevelopmental and apoptosis gene sets**

838 We obtained a set of 1,794 genes annotated with the Gene Ontology term for apoptotic  
839 processes (GO:0006915) or children terms from the Gene Ontology Consortium (AmiGO  
840 v.2.4.26) [119], and overlapped this gene set with sets of 756 candidate autism genes (SFARI  
841 Gene Tiers 1-4) [77], 1,854 candidate intellectual disability genes [93], and 2,546 curated  
842 candidate schizophrenia genes [76]. Genes in these three sets that were annotated for  
843 apoptosis function are listed in **S4 File**. To determine the statistical significance of these  
844 overlaps, we performed 100,000 simulations to identify the number of apoptosis genes among  
845 groups of genes randomly selected from the genome, and determined the percentiles for each  
846 observed overlap among the simulated overlaps as empirical p-values.

847

### 848 **Statistical analysis**

849 Details of each dataset and the associated statistical tests are provided in **S5 File**. All  
850 statistical analyses of functional data were performed using R v.3.4.2 (R Foundation for  
851 Statistical Computing, Vienna, Austria). Non-parametric one-tailed and two-tailed Mann-  
852 Whitney tests were used to analyze *Drosophila* functional data and human network data, as  
853 several datasets were not normally distributed ( $p < 0.05$ , Shapiro-Wilk tests for normality).  
854 Climbing ability and survival data for each fly RNAi line across each experiment day were  
855 analyzed using two-way and one-way repeated values ANOVA tests with post-hoc pairwise  
856 t-tests. We also used parametric t-tests to analyze *Drosophila* qPCR data and all *X. laevis*  
857 data, as these data were either normally distributed ( $p > 0.05$ , Shapiro-Wilk tests for normality)  
858 or had a robust sample size ( $n > 30$ ) for non-normality. All p-values from statistical tests  
859 derived from similar sets of experiments (i.e. *Flynotyper* scores for pairwise interactions,  
860 dcp1 rescue experiments with *Diap1*) were corrected using Benjamini-Hochberg correction.

861

862

863

## 864 **Reproducibility**

865 *Drosophila* eye area and pH3 and TUNEL staining experiments for select individual  
866 knockdown lines, as well as climbing ability experiments for a subset of individual and  
867 pairwise knockdown lines, were performed on two independent occasions with similar  
868 sample sizes. Data displayed in the main figures were derived from single batches, while data  
869 from the repeated experiments are shown in **S14 Fig**. *X. laevis* brain and eye area  
870 experiments were performed on three independent occasions, with the data shown in the  
871 figures representing pooled results of each of the three experimental batches (normalized to  
872 the respective controls from each batch). *X. laevis* qPCR experiments were performed three  
873 times and western blot experiments were performed twice, with the blots/gels for each  
874 replicate experiment shown in **S12 Fig**. Sample sizes for each experiment were determined  
875 by testing all available organisms; no prior power calculations for sample size estimation  
876 were performed. No data points or outliers were excluded from the experiments presented in  
877 the manuscript.

878

## 879 **Data availability**

880 Gene expression data for the six *Drosophila* individual and pairwise RNAi knockdown of  
881 homologs of 3q29 genes are deposited in the GEO (Gene Expression Omnibus) database with  
882 accession code GSE128094, and the raw RNA Sequencing files are deposited in the SRA  
883 (Sequence Read Archive) with BioProject accession PRJNA526450. All other data generated  
884 and analyzed in study are included in the manuscript and supporting files. All unique  
885 biological materials described in the manuscript, such as recombined fly stocks, are readily  
886 available from the authors upon request.

887

## 888 **Code availability**

889 All source code and datasets for generating genomic data (RNA-Seq, network analysis, and  
890 neurodevelopment/apoptosis gene overlap) are available on the Girirajan lab GitHub page at  
891 [https://github.com/girirajanlab/3q29\\_project](https://github.com/girirajanlab/3q29_project).

892

## 893 **ACKNOWLEDGMENTS**

894 We thank A. Krishnan for assistance with the brain-specific gene interaction network  
895 analysis, J. Tiber for technical assistance with the *X. laevis* experiments, and V. Faundez  
896 for useful discussions and critical reading of the manuscript.

## 897 REFERENCES

- 898 1. Malhotra D, Sebat J. CNVs: Harbingers of a rare variant revolution in psychiatric  
899 genetics. *Cell*. 2012;148: 1223–1241. doi:10.1016/j.cell.2012.02.039
- 900 2. Girirajan S, Campbell CD, Eichler EE. Human Copy Number Variation and Complex  
901 Genetic Disease. *Annu Rev Genet*. 2011;45: 203–226. doi:10.1146/annurev-genet-  
902 102209-163544
- 903 3. Girirajan S, Eichler EE. Phenotypic variability and genetic susceptibility to genomic  
904 disorders. *Hum Mol Genet*. 2010;19: R176-87. doi:10.1093/hmg/ddq366
- 905 4. Karayiorgou M, Morris MA, Morrow B, Shprintzen RJ, Goldberg R, Borrow J, et al.  
906 Schizophrenia susceptibility associated with interstitial deletions of chromosome  
907 22q11. *Proc Natl Acad Sci U S A*. 1995;92: 7612–7616. doi:10.1073/pnas.92.17.7612
- 908 5. Karayiorgou M, Simon TJ, Gogos JA. 22q11.2 microdeletions: Linking DNA  
909 structural variation to brain dysfunction and schizophrenia. *Nat Rev Neurosci*.  
910 2010;11: 402–416. doi:10.1038/nrn2841
- 911 6. Fénelon K, Mukai J, Xu B, Hsu P-K, Drew LJ, Karayiorgou M, et al. Deficiency of  
912 *Dgcr8*, a gene disrupted by the 22q11.2 microdeletion, results in altered short-term  
913 plasticity in the prefrontal cortex. *Proc Natl Acad Sci U S A*. 2011;108: 4447–4452.  
914 doi:10.1073/pnas.1101219108
- 915 7. Mukai J, Tamura M, Fénelon K, Rosen AM, Spellman TJ, Kang R, et al. Molecular  
916 substrates of altered axonal growth and brain connectivity in a mouse model of  
917 schizophrenia. *Neuron*. 2015;86: 680–95. doi:10.1016/j.neuron.2015.04.003
- 918 8. Ballif BC, Theisen A, Coppinger J, Gowans GC, Hersh JH, Madan-Khetarpal S, et al.  
919 Expanding the clinical phenotype of the 3q29 microdeletion syndrome and  
920 characterization of the reciprocal microduplication. *Mol Cytogenet*. 2008;1: 8.  
921 doi:10.1186/1755-8166-1-8
- 922 9. Mulle JG, Dodd AF, McGrath JA, Wolyniec PS, Mitchell AA, Shetty AC, et al.  
923 Microdeletions of 3q29 confer high risk for schizophrenia. *Am J Hum Genet*. 2010;87:  
924 229–236. doi:10.1016/j.ajhg.2010.07.013
- 925 10. Glassford MR, Rosenfeld JA, Freedman AA, Zwick ME, Mulle JG. Novel features of  
926 3q29 deletion syndrome: Results from the 3q29 registry. *Am J Med Genet Part A*.  
927 2016;170: 999–1006. doi:10.1002/ajmg.a.37537
- 928 11. Kirov G, Pocklington AJ, Holmans P, Ivanov D, Ikeda M, Ruderfer D, et al. De novo  
929 CNV analysis implicates specific abnormalities of postsynaptic signalling complexes  
930 in the pathogenesis of schizophrenia. *Mol Psychiatry*. 2012;17: 142–153.  
931 doi:10.1038/mp.2011.154
- 932 12. Mulle JG. The 3q29 deletion confers >40-fold increase in risk for schizophrenia. *Mol*  
933 *Psychiatry*. 2015;20: 1028–1029. doi:10.1038/mp.2015.76
- 934 13. Pollak RM, Murphy MM, Epstein MP, Zwick ME, Klaiman C, Saulnier CA, et al.  
935 Neuropsychiatric phenotypes and a distinct constellation of ASD features in 3q29  
936 deletion syndrome: results from the 3q29 registry. *Mol Autism*. 2019;10: 30.  
937 doi:10.1186/s13229-019-0281-5

- 938 14. Rutkowski TP, Purcell RH, Pollak RM, Grewenow SM, Gafford GM, Malone T, et al.  
939 Behavioral changes and growth deficits in a CRISPR engineered mouse model of the  
940 schizophrenia-associated 3q29 deletion. *Mol Psychiatry*. 2019. doi:10.1038/s41380-  
941 019-0413-5
- 942 15. Baba M, Yokoyama K, Seiriki K, Naka Y, Matsumura K, Kondo M, et al. Psychiatric-  
943 disorder-related behavioral phenotypes and cortical hyperactivity in a mouse model of  
944 3q29 deletion syndrome. *Neuropsychopharmacology*. 2019;44: 2125–2135.  
945 doi:10.1038/s41386-019-0441-5
- 946 16. Quintero-Rivera F, Sharifi-Hannauer P, Martinez-Agosto JA. Autistic and psychiatric  
947 findings associated with the 3q29 microdeletion syndrome: Case report and review.  
948 *Am J Med Genet Part A*. 2010;152 A: 2459–2467. doi:10.1002/ajmg.a.33573
- 949 17. Rutkowski TP, Schroeder JP, Gafford GM, Warren ST, Weinshenker D, Caspary T, et  
950 al. Unraveling the genetic architecture of copy number variants associated with  
951 schizophrenia and other neuropsychiatric disorders. *J Neurosci Res*. 2017;95: 1144–  
952 1160. doi:10.1002/jnr.23970
- 953 18. Budnik V, Koh YH, Guan B, Hartmann B, Hough C, Woods D, et al. Regulation of  
954 synapse structure and function by the *Drosophila* tumor suppressor gene *dlg*. *Neuron*.  
955 1996;17: 627–640. doi:10.1016/S0896-6273(00)80196-8
- 956 19. Walch L. Emerging role of the scaffolding protein *Dlg1* in vesicle trafficking. *Traffic*.  
957 2013;14: 964–973. doi:10.1111/tra.12089
- 958 20. Andrews T, Meader S, Vulto-van Silfhout A, Taylor A, Steinberg J, Hehir-Kwa J, et  
959 al. Gene Networks Underlying Convergent and Pleiotropic Phenotypes in a Large and  
960 Systematically-Phenotyped Cohort with Heterogeneous Developmental Disorders.  
961 *PLoS Genet*. 2015;11: e1005012. doi:10.1371/journal.pgen.1005012
- 962 21. Iyer J, Singh MD, Jensen M, Patel P, Pizzo L, Huber E, et al. Pervasive genetic  
963 interactions modulate neurodevelopmental defects of the autism-associated 16p11.2  
964 deletion in *Drosophila melanogaster*. *Nat Commun*. 2018;9: 2548.  
965 doi:10.1038/s41467-018-04882-6
- 966 22. Jensen M, Girirajan S. An interaction-based model for neuropsychiatric features of  
967 copy-number variants. *PLoS Genet*. 2019;15: e1007879.  
968 doi:10.1371/journal.pgen.1007879
- 969 23. Wangler MF, Yamamoto S, Bellen HJ. Fruit flies in biomedical research. *Genetics*.  
970 2015;199: 639–653. doi:10.1534/genetics.114.171785
- 971 24. Pratt KG, Khakhalin AS. Modeling human neurodevelopmental disorders in the  
972 *Xenopus* tadpole: from mechanisms to therapeutic targets. *Dis Model Mech*. 2013;6:  
973 1057–1065. doi:10.1242/dmm.012138
- 974 25. Reiter LT, Potocki L, Chien S, Gribskov M, Bier E. A systematic analysis of human  
975 disease-associated gene sequences in *Drosophila melanogaster*. *Genome Res*. 2001;11:  
976 1114–1125. doi:10.1101/gr.169101
- 977 26. Gatto CL, Broadie K. *Drosophila* modeling of heritable neurodevelopmental disorders.  
978 *Curr Opin Neurobiol*. 2011;21: 834–841. doi:10.1016/j.conb.2011.04.009

- 979 27. Harland RM, Grainger RM. *Xenopus* research: Metamorphosed by genetics and  
980 genomics. *Trends Genet.* 2011;27: 507–515. doi:10.1016/j.tig.2011.08.003
- 981 28. Dickman DK, Davis GW. The schizophrenia susceptibility gene dysbindin controls  
982 synaptic homeostasis. *Science*. 2009;326: 1127–1130. doi:10.1126/science.1179685
- 983 29. Shao L, Shuai Y, Wang J, Feng S, Lu B, Li Z, et al. Schizophrenia susceptibility gene  
984 dysbindin regulates glutamatergic and dopaminergic functions via distinctive  
985 mechanisms in *Drosophila*. *Proc Natl Acad Sci U S A.* 2011;108: 18831–18836.  
986 doi:10.1073/pnas.1114569108
- 987 30. Wu Y, Bolduc F V., Bell K, Tully T, Fang Y, Sehgal A, et al. A *Drosophila* model for  
988 Angelman syndrome. *Proc Natl Acad Sci U S A.* 2008;105: 12399–12404.  
989 doi:10.1073/pnas.0805291105
- 990 31. Marshak S, Meynard MM, de Vries YA, Kidane AH, Cohen-Cory S. Cell-autonomous  
991 alterations in dendritic arbor morphology and connectivity induced by overexpression  
992 of MeCP2 in *Xenopus* central neurons in vivo. *PLoS One.* 2012;7: e33153.  
993 doi:10.1371/journal.pone.0033153
- 994 32. Muller BM, Kistner U, Veh RW, Cases-Langhoff C, Becker B, Gundelfinger ED, et al.  
995 Molecular characterization and spatial distribution of SAP97, a novel presynaptic  
996 protein homologous to SAP90 and the *Drosophila* discs-large tumor suppressor  
997 protein. *J Neurosci.* 1995;15: 2354–2366. doi:10.1523/jneurosci.15-03-02354.1995
- 998 33. Sabin LR, Zhou R, Gruber JJ, Lukinova N, Bambina S, Berman A, et al. *Ars2*  
999 Regulates Both miRNA- and siRNA- Dependent Silencing and Suppresses RNA Virus  
1000 Infection in *Drosophila*. *Cell.* 2009;138: 340–351. doi:10.1016/j.cell.2009.04.045
- 1001 34. Brand AH, Perrimon N. Targeted gene expression as a means of altering cell fates and  
1002 generating dominant phenotypes. *Development.* 1993;118: 401–415.
- 1003 35. Thomas U, Kim E, Kuhlendahl S, Koh YH, Gundelfinger ED, Sheng M, et al.  
1004 Synaptic clustering of the cell adhesion molecule Fasciclin II by discs- large and its  
1005 role in the regulation of presynaptic structure. *Neuron.* 1997;19: 787–799.  
1006 doi:10.1016/S0896-6273(00)80961-7
- 1007 36. Armstrong JD, Texada MJ, Munjaal R, Baker DA, Beckingham KM. Gravitaxis in  
1008 *Drosophila melanogaster*: A forward genetic screen. *Genes, Brain Behav.* 2006;5:  
1009 222–239. doi:10.1111/j.1601-183X.2005.00154.x
- 1010 37. Mendoza-Topaz C, Urra F, Barría R, Albornoz V, Ugalde D, Thomas U, et al.  
1011 DLGS97/SAP97 is developmentally upregulated and is required for complex adult  
1012 behaviors and synapse morphology and function. *J Neurosci.* 2008;28: 304–314.  
1013 doi:10.1523/JNEUROSCI.4395-07.2008
- 1014 38. Hing H, Xiao J, Harden N, Lim L, Lawrence Zipursky S. Pak functions downstream of  
1015 Dock to regulate photoreceptor axon guidance in *Drosophila*. *Cell.* 1999;97: 853–863.  
1016 doi:10.1016/S0092-8674(00)80798-9
- 1017 39. Kim MD, Kamiyama D, Kolodziej P, Hing H, Chiba A. Isolation of Rho GTPase  
1018 effector pathways during axon development. *Dev Biol.* 2003;262: 282–293.  
1019 doi:10.1016/S0012-1606(03)00393-2



- 1020 40. Parnas D, Haghighi AP, Fetter RD, Kim SW, Goodman CS. Regulation of  
1021 postsynaptic structure and protein localization by the Rho-type guanine nucleotide  
1022 exchange factor dPix. *Neuron*. 2001;32: 415–424. doi:10.1016/S0896-6273(01)00485-  
1023 8
- 1024 41. Ng J, Luo L. Rho GTPases regulate axon growth through convergent and divergent  
1025 signaling pathways. *Neuron*. 2004;44: 779–793. doi:10.1016/j.neuron.2004.11.014
- 1026 42. Sherwood NT, Sun Q, Xue M, Zhang B, Zinn K. *Drosophila* spastin regulates synaptic  
1027 microtubule networks and is required for normal motor function. *PLoS Biol*. 2004;2:  
1028 e429. doi:10.1371/journal.pbio.0020429
- 1029 43. Chen SY, Huang PH, Cheng HJ. Disrupted-in-schizophrenia 1-mediated axon  
1030 guidance involves TRIO-RAC-PAK small GTPase pathway signaling. *Proc Natl Acad  
1031 Sci U S A*. 2011;108: 5861–5866. doi:10.1073/pnas.1018128108
- 1032 44. Morales J, Hiesinger PR, Schroeder AJ, Kume K, Verstreken P, Jackson FR, et al.  
1033 *Drosophila* fragile X protein DFXR regulates neuronal morphology and function in the  
1034 brain. *Neuron*. 2002;34: 961–972. doi:10.1016/S0896-6273(02)00731-6
- 1035 45. Thomas BJ, Wassarman DA. A fly's eye view of biology. *Trends Genet*. 1999;15:  
1036 184–190. doi:10.1016/S0168-9525(99)01720-5
- 1037 46. Thaker HM, Kankel DR. Mosaic analysis gives an estimate of the extent of genomic  
1038 involvement in the development of the visual system in *Drosophila melanogaster*.  
1039 *Genetics*. 1992;131: 883–894.
- 1040 47. Oortveld MAW, Keerthikumar S, Oti M, Nijhof B, Fernandes AC, Kochinke K, et al.  
1041 Human Intellectual Disability Genes Form Conserved Functional Modules in  
1042 *Drosophila*. *PLoS Genet*. 2013;9: e1003911. doi:10.1371/journal.pgen.1003911
- 1043 48. Cukier HN, Perez AM, Collins AL, Zhou Z, Zoghbi HY, Botas J. Genetic modifiers of  
1044 MeCP2 function in *Drosophila*. *PLoS Genet*. 2008;4: e1000179.  
1045 doi:10.1371/journal.pgen.1000179
- 1046 49. Bilen J, Bonini NM. Genome-wide screen for modifiers of ataxin-3 neurodegeneration  
1047 in *Drosophila*. *PLoS Genet*. 2007;3: 1950–64. doi:10.1371/journal.pgen.0030177
- 1048 50. Neufeld TP, Tang AH, Rubin GM. A genetic screen to identify components of the sina  
1049 signaling pathway in *Drosophila* eye development. *Genetics*. 1998;148: 277–286.
- 1050 51. Cagan RL, Ready DF. The emergence of order in the *Drosophila* pupal retina. *Dev  
1051 Biol*. 1989;136: 346–362. doi:10.1016/0012-1606(89)90261-3
- 1052 52. Kumar JP. Building an ommatidium one cell at a time. *Dev Dyn*. 2012;241: 136–149.  
1053 doi:10.1002/dvdy.23707
- 1054 53. Iyer J, Wang Q, Le T, Pizzo L, Grönke S, Ambegaokar SS, et al. Quantitative  
1055 assessment of eye phenotypes for functional genetic studies using *Drosophila  
1056 melanogaster*. *G3 Genes, Genomes, Genet*. 2016;6: 1427–1437.  
1057 doi:10.1534/g3.116.027060
- 1058 54. Grice SJ, Liu J-L, Webber C. Synergistic Interactions between *Drosophila* Orthologues  
1059 of Genes Spanned by De Novo Human CNVs Support Multiple-Hit Models of Autism.

- 1060 PLOS Genet. 2015;11: e1004998. doi:10.1371/journal.pgen.1004998
- 1061 55. Warde-Farley D, Donaldson SL, Comes O, Zuberi K, Badrawi R, Chao P, et al. The  
1062 GeneMANIA prediction server: Biological network integration for gene prioritization  
1063 and predicting gene function. *Nucleic Acids Res.* 2010;38: W214-20.  
1064 doi:10.1093/nar/gkq537
- 1065 56. Greene CS, Krishnan A, Wong AK, Ricciotti E, Zelaya RA, Himmelstein DS, et al.  
1066 Understanding multicellular function and disease with human tissue-specific networks.  
1067 *Nat Genet.* 2015;47: 569–576. doi:10.1038/ng.3259
- 1068 57. Krishnan A, Zhang R, Yao V, Theesfeld CL, Wong AK, Tadych A, et al. Genome-  
1069 wide prediction and functional characterization of the genetic basis of autism spectrum  
1070 disorder. *Nat Neurosci.* 2016;19: 1454–1462. doi:10.1038/nn.4353
- 1071 58. Paterlini M, Zakharenko SS, Lai WS, Qin J, Zhang H, Mukai J, et al. Transcriptional  
1072 and behavioral interaction between 22q11.2 orthologs modulates schizophrenia-related  
1073 phenotypes in mice. *Nat Neurosci.* 2005;8: 1586–1594. doi:10.1038/nn1562
- 1074 59. Yamaguchi Y, Miura M. Programmed Cell Death in Neurodevelopment. *Dev Cell.*  
1075 2015;32: 478–490. doi:10.1016/j.devcel.2015.01.019
- 1076 60. Ernst C. Proliferation and Differentiation Deficits are a Major Convergence Point for  
1077 Neurodevelopmental Disorders. *Trends Neurosci.* 2016;39: 290–299.  
1078 doi:10.1016/j.tins.2016.03.001
- 1079 61. Pinto D, Pagnamenta AT, Klei L, Anney R, Merico D, Regan R, et al. Functional  
1080 impact of global rare copy number variation in autism spectrum disorders. *Nature.*  
1081 2010;466: 368–372. doi:10.1038/nature09146
- 1082 62. Glantz LA, Gilmore JH, Lieberman JA, Jarskog LF. Apoptotic mechanisms and the  
1083 synaptic pathology of schizophrenia. *Schizophr Res.* 2006;81: 47–63.  
1084 doi:10.1016/j.schres.2005.08.014
- 1085 63. Steller H. Regulation of apoptosis in *Drosophila*. *Cell Death Differ.* 2008;15: 1132–  
1086 1138. doi:10.1038/cdd.2008.50
- 1087 64. Coe BP, Girirajan S, Eichler EE. A genetic model for neurodevelopmental disease.  
1088 *Curr Opin Neurobiol.* 2012;22: 829–836. doi:10.1016/j.conb.2012.04.007
- 1089 65. Nicholas AK, Swanson EA, Cox JJ, Karbani G, Malik S, Springell K, et al. The  
1090 molecular landscape of ASPM mutations in primary microcephaly. *J Med Genet.*  
1091 2009;46: 249–253. doi:10.1136/jmg.2008.062380
- 1092 66. Coba MP, Ramaker MJ, Ho E V, Thompson SL, Komiyama NH, Grant SGN, et al.  
1093 *Dlgap1* knockout mice exhibit alterations of the postsynaptic density and selective  
1094 reductions in sociability. *Sci Rep.* 2018;8: 2281. doi:10.1038/s41598-018-20610-y
- 1095 67. Duffney LJ, Zhong P, Wei J, Matas E, Cheng J, Qin L, et al. Autism-like Deficits in  
1096 *Shank3*-Deficient Mice Are Rescued by Targeting Actin Regulators. *Cell Rep.*  
1097 2015;11: 1400–1413. doi:10.1016/j.celrep.2015.04.064
- 1098 68. Park E, Na M, Choi J, Kim S, Lee J-R, Yoon J, et al. The Shank Family of  
1099 Postsynaptic Density Proteins Interacts with and Promotes Synaptic Accumulation of

- 1100 the  $\beta$ PIX Guanine Nucleotide Exchange Factor for Rac1 and Cdc42. *J Biol Chem.*  
1101 2003;278: 19220–19229. doi:10.1074/jbc.M301052200
- 1102 69. Saiga T, Fukuda T, Matsumoto M, Tada H, Okano HJ, Okano H, et al. Fbxo45 Forms  
1103 a Novel Ubiquitin Ligase Complex and Is Required for Neuronal Development. *Mol*  
1104 *Cell Biol.* 2009;29: 3529–3543. doi:10.1128/mcb.00364-09
- 1105 70. Marlin JW, Chang YWE, Ober M, Handy A, Xu W, Jakobi R. Functional PAK-2  
1106 knockout and replacement with a caspase cleavage-deficient mutant in mice reveals  
1107 differential requirements of full-length PAK-2 and caspase-activated PAK-2p34.  
1108 *Mamm Genome.* 2011;22: 306–317. doi:10.1007/s00335-011-9326-6
- 1109 71. Wang L, Magdaleno S, Tabas I, Jackowski S. Early Embryonic Lethality in Mice with  
1110 Targeted Deletion of the CTP:Phosphocholine Cytidylyltransferase Gene (*Pcyl1a*).  
1111 *Mol Cell Biol.* 2005;25: 3357–3363. doi:10.1128/mcb.25.8.3357-3363.2005
- 1112 72. Wang Y, Zeng C, Li J, Zhou Z, Ju X, Xia S, et al. PAK2 Haploinsufficiency Results in  
1113 Synaptic Cytoskeleton Impairment and Autism-Related Behavior. *Cell Rep.* 2018;24:  
1114 2029–2041. doi:10.1016/j.celrep.2018.07.061
- 1115 73. Levy JE, Jin O, Fujiwara Y, Kuo F, Andrews NC. Transferrin receptor is necessary for  
1116 development of erythrocytes and the nervous system. *Nat Genet.* 1999;21: 396–399.  
1117 doi:10.1038/7727
- 1118 74. Eicher JD, Landowski C, Stackhouse B, Sloan A, Chen W, Jensen N, et al. GRASP  
1119 v2.0: An update on the Genome-Wide Repository of Associations between SNPs and  
1120 Phenotypes. *Nucleic Acids Res.* 2015;43: D799–D804. doi:10.1093/nar/gku1202
- 1121 75. Turner TN, Yi Q, Krumm N, Huddleston J, Hoekzema K, Stessman HAF, et al. NAR  
1122 Breakthrough Article denovo-db: A compendium of human de novo variants. *Nucleic*  
1123 *Acids Res.* 2017;45: D804–D811. doi:10.1093/nar/gkw865
- 1124 76. Purcell SM, Moran JL, Fromer M, Ruderfer D, Solovieff N, Roussos P, et al. A  
1125 polygenic burden of rare disruptive mutations in schizophrenia. *Nature.* 2014;506:  
1126 185–190. doi:10.1038/nature12975
- 1127 77. Abrahams BS, Arking DE, Campbell DB, Mefford HC, Morrow EM, Weiss LA, et al.  
1128 SFARI Gene 2.0: A community-driven knowledgebase for the autism spectrum  
1129 disorders (ASDs). *Mol Autism.* 2013;4: 36. doi:10.1186/2040-2392-4-36
- 1130 78. Pabis M, Neufeld N, Shav-Tal Y, Neugebauer KM. Binding properties and dynamic  
1131 localization of an alternative isoform of the cap-binding complex subunit CBP20.  
1132 *Nucleus.* 2010;1: 412–21. doi:10.4161/nucl.1.5.12839
- 1133 79. Maquat LE. Nonsense-mediated mRNA decay: Splicing, translation and mRNP  
1134 dynamics. *Nat Rev Mol Cell Biol.* 2004;5: 89–99. doi:10.1038/nrm1310
- 1135 80. Gonatopoulos-Pournatzis T, Cowling VH. Cap-binding complex (CBC). *Biochem J.*  
1136 2014;458: 185–185. doi:10.1042/bj4580185
- 1137 81. Xu D, Woodfield SE, Lee T V, Fan Y, Antonio C, Bergmann A. Genetic control of  
1138 programmed cell death (apoptosis) in *Drosophila*. *Fly (Austin).* 2009;3: 78–90.  
1139 doi:10.4161/fly.3.1.7800

- 1140 82. Kornbluth S, White K. Apoptosis in *Drosophila*: Neither fish nor fowl (nor man, nor  
1141 worm). *J Cell Sci.* 2005;118: 1779–1787. doi:10.1242/jcs.02377
- 1142 83. Tittel JN, Steller H. A comparison of programmed cell death between species. *Genome*  
1143 *Biol.* 2000;1: REVIEWS0003. doi:10.1186/gb-2000-1-3-reviews0003
- 1144 84. Bilder D, Li M, Perrimon N. Cooperative regulation of cell polarity and growth by  
1145 *Drosophila* tumor suppressors. *Science.* 2000;289: 113–116.  
1146 doi:10.1126/science.289.5476.113
- 1147 85. Humbert P, Russell S, Richardson H. Dlg, scribble and Lgl in cell polarity, cell  
1148 proliferation and cancer. *BioEssays.* 2003;25: 542–553. doi:10.1002/bies.10286
- 1149 86. Shin EY, Shin KS, Lee CS, Woo KN, Quan SH, Soung NK, et al. Phosphorylation of  
1150 p85  $\beta$ PIX, a Rac/Cdc42-specific guanine nucleotide exchange factor, via the  
1151 Ras/ERK/PAK2 pathway is required for basic fibroblast growth factor-induced neurite  
1152 outgrowth. *J Biol Chem.* 2002;277: 44417–44430. doi:10.1074/jbc.M203754200
- 1153 87. Luo S, Rubinsztein DC. Huntingtin promotes cell survival by preventing Pak2  
1154 cleavage. *J Cell Sci.* 2009;122: 875–885. doi:10.1242/jcs.050013
- 1155 88. Courchesne E, Mouton PR, Calhoun ME, Semendeferi K, Ahrens-Barbeau C, Hallet  
1156 MJ, et al. Neuron number and size in prefrontal cortex of children with autism. *JAMA*  
1157 *- J Am Med Assoc.* 2011;306: 2001–2010. doi:10.1001/jama.2011.1638
- 1158 89. Kreczmanski P, Heinsen H, Mantua V, Woltersdorf F, Masson T, Ulfing N, et al.  
1159 Volume, neuron density and total neuron number in five subcortical regions in  
1160 schizophrenia. *Brain.* 2007;130: 678–692. doi:10.1093/brain/awl386
- 1161 90. Dong D, Zielke HR, Yeh D, Yang P. Cellular stress and apoptosis contribute to the  
1162 pathogenesis of autism spectrum disorder. *Autism Res.* 2018;11: 1076–1090.  
1163 doi:10.1002/aur.1966
- 1164 91. Batalla A, Bargalló N, Gassó P, Molina O, Pareto D, Mas S, et al. Apoptotic markers  
1165 in cultured fibroblasts correlate with brain metabolites and regional brain volume in  
1166 antipsychotic-naïve first-episode schizophrenia and healthy controls. *Transl*  
1167 *Psychiatry.* 2015;5: e626. doi:10.1038/tp.2015.122
- 1168 92. Gassó P, Mas S, Molina O, Lafuente A, Bernardo M, Parellada E. Increased  
1169 susceptibility to apoptosis in cultured fibroblasts from antipsychotic-naïve first-episode  
1170 schizophrenia patients. *J Psychiatr Res.* 2014;48: 94–101.  
1171 doi:10.1016/j.jpsychires.2013.09.017
- 1172 93. Thormann A, Halachev M, McLaren W, Moore DJ, Svinti V, Campbell A, et al.  
1173 Flexible and scalable diagnostic filtering of genomic variants using G2P with Ensembl  
1174 VEP. *Nat Commun.* 2019;10: 2373. doi:10.1038/s41467-019-10016-3
- 1175 94. Girirajan S, Rosenfeld JA, Coe BP, Parikh S, Friedman N, Goldstein A, et al.  
1176 Phenotypic Heterogeneity of Genomic Disorders and Rare Copy-Number Variants. *N*  
1177 *Engl J Med.* 2012;367: 1321–1331. doi:10.1056/NEJMoa1200395
- 1178 95. Lindsay EA, Vitelli F, Su H, Morishima M, Huynh T, Pramparo T, et al. *Tbx1*  
1179 haploinsufficiency in the DiGeorge syndrome region causes aortic arch defects in  
1180 mice. *Nature.* 2001;410: 97–101. doi:10.1038/35065105

- 1181 96. Poulton CJ, Schot R, Kia SK, Jones M, Verheijen FW, Venselaar H, et al.  
1182 Microcephaly with simplified gyration, epilepsy, and infantile diabetes linked to  
1183 inappropriate apoptosis of neural progenitors. *Am J Hum Genet.* 2011;89: 265–276.  
1184 doi:10.1016/j.ajhg.2011.07.006
- 1185 97. Silver DL, Watkins-Chow DE, Schreck KC, Pierfelice TJ, Larson DM, Burnetti AJ, et  
1186 al. The exon junction complex component Magoh controls brain size by regulating  
1187 neural stem cell division. *Nat Neurosci.* 2010;13: 551–558. doi:10.1038/nn.2527
- 1188 98. Faheem M, Naseer MI, Rasool M, Chaudhary AG, Kumosani TA, Ilyas AM, et al.  
1189 Molecular genetics of human primary microcephaly: an overview. *BMC Med*  
1190 *Genomics.* 2015;8: S4. doi:10.1186/1755-8794-8-S1-S4
- 1191 99. Frappart P-O, Tong W-M, Demuth I, Radovanovic I, Herceg Z, Aguzzi A, et al. An  
1192 essential function for NBS1 in the prevention of ataxia and cerebellar defects. *Nat*  
1193 *Med.* 2005;11: 538–544. doi:10.1038/nm1228
- 1194 100. Hu Y, Flockhart I, Vinayagam A, Bergwitz C, Berger B, Perrimon N, et al. An  
1195 integrative approach to ortholog prediction for disease-focused and other functional  
1196 studies. *BMC Bioinformatics.* 2011;12: 357. doi:10.1186/1471-2105-12-357
- 1197 101. Mi H, Huang X, Muruganujan A, Tang H, Mills C, Kang D, et al. PANTHER version  
1198 11: expanded annotation data from Gene Ontology and Reactome pathways, and data  
1199 analysis tool enhancements. *Nucleic Acids Res.* 2017;45: D183–D189.  
1200 doi:10.1093/nar/gkw1138
- 1201 102. Dietzl G, Chen D, Schnorrer F, Su K-C, Barinova Y, Fellner M, et al. A genome-wide  
1202 transgenic RNAi library for conditional gene inactivation in *Drosophila*. *Nature.*  
1203 2007;448: 151–6. doi:10.1038/nature05954
- 1204 103. Green EW, Fedele G, Giorgini F, Kyriacou CP. A *Drosophila* RNAi collection is  
1205 subject to dominant phenotypic effects. *Nat Methods.* 2014;11: 222–223.  
1206 doi:10.1038/nmeth.2856
- 1207 104. Chintapalli VR, Wang J, Dow JAT. Using FlyAtlas to identify better *Drosophila*  
1208 *melanogaster* models of human disease. *Nat Genet.* 2007;39: 715–720.  
1209 doi:10.1038/ng2049
- 1210 105. Graveley BR, Brooks AN, Carlson JW, Duff MO, Landolin JM, Yang L, et al. The  
1211 developmental transcriptome of *Drosophila melanogaster*. *Nature.* 2011;471: 473–479.  
1212 doi:10.1038/nature09715
- 1213 106. Ye J, Coulouris G, Zaretskaya I, Cutcutache I, Rozen S, Madden TL. Primer-BLAST:  
1214 A tool to design target-specific primers for polymerase chain reaction. *BMC*  
1215 *Bioinformatics.* 2012;13: 134. doi:10.1186/1471-2105-13-134
- 1216 107. Livak KJ, Schmittgen TD. Analysis of Relative Gene Expression Data Using Real-  
1217 Time Quantitative PCR and the  $2^{-\Delta\Delta CT}$  Method. *Methods.* 2001;25: 402–408.  
1218 doi:10.1006/meth.2001.1262
- 1219 108. Schneider CA, Rasband WS, Eliceiri KW. NIH Image to ImageJ: 25 years of image  
1220 analysis. *Nat Methods.* 2012;9: 671–675. doi:10.1038/nmeth.2089
- 1221 109. Bolger AM, Lohse M, Usadel B. Trimmomatic: A flexible trimmer for Illumina

- 1222 sequence data. *Bioinformatics*. 2014;30: 2114–2120.  
1223 doi:10.1093/bioinformatics/btu170
- 1224 110. Kim D, Pertea G, Trapnell C, Pimentel H, Kelley R, Salzberg SL. TopHat2: accurate  
1225 alignment of transcriptomes in the presence of insertions, deletions and gene fusions.  
1226 *Genome Biol*. 2013;14: R36. doi:10.1186/gb-2013-14-4-r36
- 1227 111. Anders S, Pyl PT, Huber W. HTSeq-A Python framework to work with high-  
1228 throughput sequencing data. *Bioinformatics*. 2015;31: 166–169.  
1229 doi:10.1093/bioinformatics/btu638
- 1230 112. Robinson MD, McCarthy DJ, Smyth GK. edgeR: A Bioconductor package for  
1231 differential expression analysis of digital gene expression data. *Bioinformatics*.  
1232 2009;26: 139–140. doi:10.1093/bioinformatics/btp616
- 1233 113. Dougherty JD, Schmidt EF, Nakajima M, Heintz N. Analytical approaches to RNA  
1234 profiling data for the identification of genes enriched in specific cells. *Nucleic Acids*  
1235 *Res*. 2010;38: 4218–4230. doi:10.1093/nar/gkq130
- 1236 114. Miller JA, Ding S-L, Sunkin SM, Smith KA, Ng L, Szafer A, et al. Transcriptional  
1237 landscape of the prenatal human brain. *Nature*. 2014;508: 199–206.  
1238 doi:10.1038/nature13185
- 1239 115. Sive HL, Grainger RM, Harland RM. Microinjection of *Xenopus* Oocytes. *Cold*  
1240 *Spring Harb Protoc*. 2010;2010: pdb.prot5536. doi:10.1101/pdb.prot5536
- 1241 116. Lowery LA, Faris AER, Stout A, Van Vactor D. Neural Explant Cultures from  
1242 *Xenopus laevis*. *J Vis Exp*. 2012; e4232. doi:10.3791/4232
- 1243 117. Nieuwkoop PD, Faber J. Normal table of *Xenopus laevis* (Daudin) : a systematical and  
1244 chronological survey of the development from the fertilized egg till the end of  
1245 metamorphosis. New York : Garland Pub; 1994.
- 1246 118. Hagberg AA, Schult DA, Swart PJ. Exploring network structure, dynamics, and  
1247 function using NetworkX. 7th Python in Science Conference (SciPy 2008). 2008. pp.  
1248 11–15.
- 1249 119. Carbon S, Ireland A, Mungall CJ, Shu S, Marshall B, Lewis S, et al. AmiGO: Online  
1250 access to ontology and annotation data. *Bioinformatics*. 2009;25: 288–289.  
1251 doi:10.1093/bioinformatics/btn615
- 1252 120. Karimi K, Fortriede JD, Lotay VS, Burns KA, Wang DZ, Fisher ME, et al. Xenbase: A  
1253 genomic, epigenomic and transcriptomic model organism database. *Nucleic Acids Res*.  
1254 2018;46: D861–D868. doi:10.1093/nar/gkx936
- 1255 121. Greenwood S, Struhl G. Progression of the morphogenetic furrow in the *Drosophila*  
1256 eye: The roles of Hedgehog, Decapentaplegic and the Raf pathway. *Development*.  
1257 1999;126: 5795–5808.
- 1258 122. Thurmond J, Goodman JL, Strelets VB, Attrill H, Gramates LS, Marygold SJ, et al.  
1259 FlyBase 2.0: The next generation. *Nucleic Acids Res*. 2019;47: D759–D765.  
1260 doi:10.1093/nar/gky1003
- 1261 123. Bult CJ, Blake JA, Smith CL, Kadin JA, Richardson JE, Anagnostopoulos A, et al.

- 1262 Mouse Genome Database (MGD) 2019. *Nucleic Acids Res.* 2019;47: D801–D806.  
1263 doi:10.1093/nar/gky1056
- 1264 124. Petrovski S, Wang Q, Heinzen EL, Allen AS, Goldstein DB. Genic Intolerance to  
1265 Functional Variation and the Interpretation of Personal Genomes. *PLoS Genet.* 2013;9:  
1266 e1003709. doi:10.1371/journal.pgen.1003709
- 1267 125. Lek M, Karczewski KJ, Minikel E V., Samocha KE, Banks E, Fennell T, et al.  
1268 Analysis of protein-coding genetic variation in 60,706 humans. *Nature.* 2016;536:  
1269 285–291. doi:10.1038/nature19057
- 1270 126. O’Leary NA, Wright MW, Brister JR, Ciuffo S, Haddad D, McVeigh R, et al.  
1271 Reference sequence (RefSeq) database at NCBI: Current status, taxonomic expansion,  
1272 and functional annotation. *Nucleic Acids Res.* 2016;44: D733–D745.  
1273 doi:10.1093/nar/gkv1189
- 1274 127. UniProt Consortium. UniProt: the universal protein knowledgebase. *Nucleic Acids*  
1275 *Res.* 2018;46: 2699–2699. doi:10.1093/nar/gky092
- 1276 128. The Gene Ontology Consortium. The Gene Ontology Resource: 20 years and still  
1277 GOing strong. *Nucleic Acids Res.* 2019;47: D330–D338. doi:10.1093/nar/gky1055
- 1278

1279 **FIGURE LEGENDS**

1280 **Fig. 1. Strategy for identifying cellular phenotypes and genetic interactions of homologs**  
1281 **of 3q29 genes.**

1282 We first knocked down individual or pairs of 14 *Drosophila* homologs of human genes in the  
1283 3q29 region using tissue-specific RNAi. After screening for global phenotypes of RNAi lines  
1284 for individual homologs of 3q29 genes, we tested 314 pairwise gene interactions using the fly  
1285 eye, and found that *Cbp20* (*NCBP2*) enhanced the phenotypes of other homologs of 3q29  
1286 genes and also interacted with homologs of known neurodevelopmental genes outside of the  
1287 3q29 region. Next, we assayed for deeper cellular and neuronal phenotypes of flies with  
1288 individual and pairwise knockdown of homologs of 3q29 genes, and observed cellular defects  
1289 due to disrupted apoptosis and cell cycle mechanisms. We confirmed our results by rescuing  
1290 cellular phenotypes with overexpression of the apoptosis inhibitor *Diap1* and by analyzing  
1291 genes differentially expressed with knockdown of homologs of 3q29 genes. Finally, we tested  
1292 a subset of three homologs of 3q29 genes in the *X. laevis* vertebrate model system by  
1293 injecting two- or four-cell stage embryos with GFP and morpholinos (MOs) for *X. laevis*  
1294 homologs of 3q29 genes to observe abnormal eye morphology, as well as injecting one cell  
1295 with GFP and MOs at the two-cell stage to observe abnormal brain morphology. We found  
1296 similar developmental defects in *X. laevis* to those observed in *Drosophila*, including  
1297 increased apoptosis that was enhanced with pairwise knockdown of homologs of 3q29 genes  
1298 and rescued with overexpression of the apoptosis inhibitor *xiap*. *X. laevis* embryo diagrams  
1299 were produced by Nieuwkoop and Faber [117] and provided by Xenbase [120].

1300  
1301 **Fig. 2. Neurodevelopmental defects in flies with knockdown of individual homologs of**  
1302 **3q29 genes.**

1303 (A) Percentage of flies with tissue-specific RNAi knockdown of homologs of 3q29 genes  
1304 (listed with their human counterparts) that manifest lethality or developmental phenotypes.  
1305 (B) Eight homologs of 3q29 genes with pan-neuronal RNAi knockdown showed defects in  
1306 climbing ability over ten days (two-way repeated measures ANOVA,  $p < 1 \times 10^{-4}$ ,  $df = 8$ ,  
1307  $F = 21.097$ ). Data represented show mean  $\pm$  standard deviation of 10 independent groups of  
1308 10 flies for each homolog. (C) Representative brightfield adult eye images of flies with eye-  
1309 specific *GMR-GAL4;UAS-Dicer2* (scale bar = 100  $\mu$ m) RNAi knockdown of individual  
1310 homologs of 3q29 genes show rough eye phenotypes. The boxplot shows *Flynotyper*-derived  
1311 phenotypic scores for eyes with knockdown of homologs of 3q29 genes ( $n = 10-14$ ,  
1312 \* $p < 0.05$ , one-tailed Mann-Whitney test with Benjamini-Hochberg correction). (D) Boxplot



1313 of adult eye area in flies with *GMR-GAL4* RNAi knockdown of fly homologs of 3q29 genes  
1314 ( $n = 13-16$ ,  $*p < 0.05$ , two-tailed Mann–Whitney test with Benjamini-Hochberg correction).  
1315 (E) Confocal images of pupal eyes (scale bar = 5  $\mu\text{m}$ ) stained with anti-DLG (top) and larval  
1316 eye discs (scale bar = 30  $\mu\text{m}$ ) stained with anti-pH3 (middle) and anti-dcp1 (bottom) illustrate  
1317 cellular defects posterior to the morphogenetic furrow (white box) upon knockdown of select  
1318 fly homologs of 3q29 genes. Yellow circles in DLG images indicate cone cell defects, white  
1319 circles indicate bristle cell defects, yellow arrows indicate rotation defects, and yellow  
1320 arrowheads indicate secondary cell defects. We note that pupal eye images were taken at a  
1321 higher intensity for lines with knockdown of *dlg1* to account for reduced expression of DLG  
1322 (see Methods), as these images were only for visualization of cell boundaries in the pupal eye  
1323 and not for any quantitative analysis. (F) Boxplot of pH3-positive cells in larval eye discs of  
1324 flies with knockdown of homologs of 3q29 genes ( $n = 9-12$ ,  $*p < 0.05$ , two-tailed Mann–  
1325 Whitney test with Benjamini-Hochberg correction). (G) Boxplot of dcp1-positive cells in  
1326 larval eye discs of flies with knockdown of homologs of 3q29 genes ( $n = 11-12$ ,  $*p < 0.05$ ,  
1327 two-tailed Mann–Whitney test with Benjamini-Hochberg correction). All boxplots indicate  
1328 median (center line), 25th and 75th percentiles (bounds of box), and minimum and maximum  
1329 (whiskers), with red dotted lines representing the control median. Results for a subset of  
1330 climbing ability, adult eye area, and pH3 staining experiments were replicated in independent  
1331 experimental batches (S14 Fig.). A list of full genotypes for fly crosses used in these  
1332 experiments is provided in S2 File.

1333

1334 **Fig. 3. Screening for pairwise interactions of fly homologs of 3q29 genes in the**  
1335 ***Drosophila* eye and nervous system.**

1336 (A) Heatmap showing average changes in phenotypic scores for pairwise *GMR-GAL4* RNAi  
1337 knockdown of fly homologs of 3q29 genes in the adult eye, compared with recombined lines  
1338 for individual homologs of 3q29 genes crossed with controls. Gray boxes indicate crosses  
1339 without available data. Boxplots of phenotypic scores for pairwise knockdown of (B) *Cbp20*  
1340 and (C) *dlg1* with other fly homologs of 3q29 genes are shown ( $n = 5-14$ ,  $*p < 0.05$ , two-  
1341 tailed Mann–Whitney test with Benjamini-Hochberg correction). Green arrows indicate an  
1342 example pair of reciprocal lines showing enhanced phenotypes compared with their  
1343 respective single-hit recombined controls. Crosses with the mutant line *Tsf2*<sup>KG01571</sup> are  
1344 included along with RNAi lines for other homologs of 3q29 genes, as eye-specific RNAi  
1345 knockdown of *Tsf2* was lethal. (D) Representative brightfield adult eye images of flies with  
1346 pairwise knockdown of fly homologs of 3q29 genes (scale bar = 100  $\mu\text{m}$ ) show enhancement

1347 (Enh.) of rough eye phenotypes compared with recombined lines for individual homologs of  
1348 3q29 genes crossed with controls. (E) Representative confocal images of larval eye discs  
1349 stained with anti-chaoptin (scale bar = 30  $\mu\text{m}$ ) illustrate enhanced defects (Enh.) in axon  
1350 targeting (white arrows) from the retina to the optic lobes of the brain with eye-specific  
1351 knockdown of *Cbp20/dlg1* and *Cbp20/Fsn* compared with *Cbp20* knockdown. Note that n=9-  
1352 17 larval eye disc preparations were assessed for each tested interaction. (F) Flies with pan-  
1353 neuronal *Elav-GAL4* pairwise knockdown of homologs of 3q29 genes showed enhanced  
1354 defects in climbing ability over ten days (two-way repeated measures ANOVA,  $p < 4.00 \times 10^{-4}$ ,  
1355  $df = 2$ ,  $F = 7.966$ ) compared with recombined *Cbp20* knockdown crossed with control. Data  
1356 represented show mean  $\pm$  standard deviation of 10 independent groups of 10 flies for each  
1357 line tested. Results for the climbing assays were replicated in an independent experimental  
1358 batch (S14 Fig.). All boxplots indicate median (center line), 25th and 75th percentiles  
1359 (bounds of box), and minimum and maximum (whiskers), with red dotted lines representing  
1360 the control median. A list of full genotypes for fly crosses used in these experiments is  
1361 provided in S2 File.

1362

1363 **Fig. 4. Connectivity of 3q29 genes in human gene interaction databases.**

1364 (A) Genetic interactions of 3q29 genes in the context of a general human gene interaction  
1365 network (GeneMania). The strongly connected component includes 11/21 total 3q29 genes.  
1366 Black-shaded nodes represent the input 3q29 genes, while grey nodes represent connector  
1367 genes in the network. Edge color represents the interaction data source (purple: co-  
1368 expression, orange: predicted interaction), while edge thickness represents weighted scores  
1369 for each interaction. (B) Genetic interactions of 19 genes in the 3q29 region in the context of  
1370 a brain-specific human gene interaction network (GIANT). Large nodes represent the input  
1371 3q29 genes, while small nodes represent connector genes in the network. Edge color  
1372 represents the weighted score for each interaction, from low connectivity (green) to high  
1373 connectivity (red). (C) Histograms and smoothed normal distributions showing the average  
1374 connectivity among genes in the 3q29 region (blue) along with two other large CNVs,  
1375 16p11.2 (red) and 22q11.2 deletion (green), within a brain-specific gene interaction network.  
1376 Average connectivity is measured as the shortest weighted distance between two genes, with  
1377 lower distances representing higher connectivity. Genes within the 3q29 and 22q11.2  
1378 deletions were not significantly more connected to each other ( $p > 0.05$ , one-tailed Mann-  
1379 Whitney test with Benjamini-Hochberg correction) than random sets of 21 genes throughout  
1380 the genome (grey). However, genes within the 16p11.2 region were significantly more

1381 connected to each other than the random gene sets ( $p=0.003$ , one-tailed Mann-Whitney test  
1382 with Benjamini-Hochberg correction). **(D)** Pairwise connectivity of individual 3q29 genes  
1383 within a brain-specific gene interaction network, excluding six genes not present in the  
1384 network (*RNF168*, *ZDHHC19*, *LRRC33*, *OSTalpha*, *SMCO1*, and *TCTEX1D2*). Average  
1385 connectivity is measured as the shortest weighted distance between two genes, with lower  
1386 values representing higher connectivity. Underlined genes have a higher average connectivity  
1387 ( $p<0.05$ , one-tailed Mann-Whitney test with Benjamini-Hochberg correction) to other genes  
1388 in the region compared with random sets of 21 genes throughout the genome.

1389

1390 **Fig. 5. Cellular phenotypes with pairwise knockdown of fly homologs of 3q29 genes.**

1391 **(A)** Representative brightfield adult eye images (scale bar = 100  $\mu\text{m}$ ) show that heterozygous  
1392 *GMR-GAL4* RNAi knockdown of *dlg1* enhanced the rough eye phenotype and necrotic  
1393 patches (yellow circles) of flies heterozygous or homozygous for *Cbp20* RNAi. **(B)**  
1394 Representative confocal images of pupal eyes (scale bar = 5  $\mu\text{m}$ ) stained with anti-DLG  
1395 illustrate enhanced defects in ommatidial organization upon concomitant knockdown of  
1396 *Cbp20* with other fly homologs of 3q29 genes compared with *Cbp20* knockdown. Yellow  
1397 circles in DLG images indicate cone cell defects, white circles indicate bristle cell defects,  
1398 yellow arrows indicate rotation defects, and yellow arrowheads indicate secondary cell  
1399 defects. We note that pupal eye images were taken at a higher intensity for lines with  
1400 knockdown of *Cbp20/dlg1* to account for reduced expression of DLG (see Methods), as these  
1401 images were only for visualization of cell boundaries in the pupal eye and not for any  
1402 quantitative analysis. **(C)** Representative confocal images of pupal eyes (scale bar = 5  $\mu\text{m}$ )  
1403 stained with Phalloidin illustrate enhanced defects in photoreceptor cell count and  
1404 organization upon concomitant knockdown of *Cbp20* and other fly homologs of 3q29 genes  
1405 compared with *Cbp20* knockdown. **(D)** Representative confocal images of larval eye discs  
1406 (scale bar = 30  $\mu\text{m}$ ) stained with anti-dcp1 (top) and anti-pH3 (bottom) show enhanced  
1407 defects in apoptosis and cell proliferation with pairwise knockdown of *Cbp20* and other fly  
1408 homologs of 3q29 genes compared with recombined *Cbp20* knockdown crossed with  
1409 controls. **(E)** Boxplot of dcp1-positive cells in the larval eye discs of flies with pairwise  
1410 knockdown of homologs of 3q29 genes ( $n = 10-11$ ,  $*p < 0.05$ , two-tailed Mann-Whitney test  
1411 with Benjamini-Hochberg correction). **(F)** Boxplot of pH3-positive cells in the larval eye  
1412 discs of flies with pairwise knockdown of homologs of 3q29 genes ( $n = 10-12$ ,  $*p < 0.05$ ,  
1413 two-tailed Mann-Whitney test with Benjamini-Hochberg correction). All boxplots indicate  
1414 median (center line), 25th and 75th percentiles (bounds of box), and minimum and maximum

1415 (whiskers), with red dotted lines representing the control median. A list of full genotypes for  
1416 fly crosses used in these experiments is provided in **S2 File**.

1417

1418 **Fig. 6. Rescue of cellular phenotypes due to knockdown of fly homologs of 3q29 genes**  
1419 **with overexpression of the apoptosis inhibitor *Diap1*.**

1420 (A) Representative brightfield adult eye images (scale bar = 100  $\mu$ m) show rescue of rough  
1421 eye phenotypes for flies with concomitant *GMR-GAL4* RNAi knockdown of *Cbp20* or *dlg1*  
1422 and overexpression of *Diap1*, as well as enhanced (Enh.) phenotypes with overexpression of  
1423 caspase-9 homolog *Dronc*. (B) Boxplot of phenotypic scores for flies with knockdown of  
1424 *Cbp20* or *dlg1* and overexpression of *Diap1* or *Dronc* (n = 8–9, \*p < 0.05, two-tailed Mann–  
1425 Whitney test with Benjamini-Hochberg correction) is shown. (C) Box plot showing area of  
1426 necrotic patches in adult fly eyes with knockdown of *Cbp20* and overexpression of *Dronc*  
1427 (n=9, \*p=1.14 $\times$ 10<sup>-4</sup>, one-tailed Mann–Whitney test with Benjamini-Hochberg correction) is  
1428 shown. (D) Confocal images of pupal eyes (scale bar = 5  $\mu$ m) stained with anti-DLG illustrate  
1429 the rescue of ommatidial organization defects due to knockdown of *Cbp20* or *dlg1* upon  
1430 overexpression of *Diap1*. Yellow circles in DLG images indicate cone cell defects, white  
1431 circles indicate bristle cell defects, yellow arrows indicate rotation defects, and yellow  
1432 arrowheads indicate secondary cell defects. We note that pupal eye images were taken at a  
1433 higher intensity for lines with knockdown of *dlg1* to account for reduced expression of DLG  
1434 (see Methods), as these images were only for visualization of cell boundaries in the pupal eye  
1435 and not for any quantitative analysis. (E) Larval eye discs (scale bar = 30  $\mu$ m) stained with  
1436 anti-dcp1 show rescue of apoptosis phenotypes observed in flies with *Cbp20* and *dlg1*  
1437 knockdown upon *Diap1* overexpression as well as enhanced (Enh.) phenotypes upon *Dronc*  
1438 overexpression. (F) Boxplot of dcp1-positive cells in the larval eye discs of flies with  
1439 knockdown of *Cbp20* or *dlg1* and *Diap1* or *Dronc* overexpression (n = 9–18, \*p < 0.05, two-  
1440 tailed Mann–Whitney test with Benjamini-Hochberg correction). (G) Representative confocal  
1441 images of larval eye discs stained with anti-chaoptin (scale bar = 30  $\mu$ m) illustrate the  
1442 suppression (Supp.) of axon targeting defects (white arrows) observed in flies due to  
1443 knockdown of *Cbp20* or *dlg1* with overexpression of *Diap1*. Note that n=8-18 larval eye disc  
1444 preparations were assessed for each interaction cross tested. All boxplots indicate median  
1445 (center line), 25th and 75th percentiles (bounds of box), and minimum and maximum  
1446 (whiskers), with red dotted lines representing the control median. A list of full genotypes for  
1447 fly crosses used in these experiments is provided in **S2 File**.

1448

1449 **Fig. 7. Pairwise interactions between fly homologs of 3q29 genes and other**  
1450 **neurodevelopmental genes.**

1451 (A) Heatmap showing the average changes in phenotypic scores for the *GMR-GAL4* pairwise  
1452 RNAi knockdown of fly homologs for 3q29 genes and other neurodevelopmental genes  
1453 (along with their human counterparts) in the adult eye, compared with recombined lines for  
1454 individual homologs of 3q29 genes crossed with controls. (B) Representative brightfield adult  
1455 eye images of flies with pairwise knockdown of fly homologs for 3q29 genes and known  
1456 neurodevelopmental genes (scale bar = 100  $\mu\text{m}$ ) show enhancement (Enh.) or suppression  
1457 (Supp.) of rough eye phenotypes and necrotic patches compared with flies with knockdown  
1458 of individual homologs of neurodevelopmental genes. A list of full genotypes for fly crosses  
1459 used in these experiments is provided in **S2 File**.

1460

1461 **Fig. 8. Developmental phenotypes observed with knockdown of homologs of 3q29 genes**  
1462 **in *X. laevis* models.**

1463 (A) To study brain morphology upon knockdown of *X. laevis* homologs of genes in the 3q29  
1464 region, one cell in a two-cell embryo was injected with single or multiple MOs for homologs  
1465 of 3q29 genes while the other cell remained uninjected. Representative images of stage 47 *X.*  
1466 *laevis* tadpoles (scale bar = 500  $\mu\text{m}$ ) with MO knockdown of *ncbp2*, *fxbo45* and *pak2* show  
1467 morphological defects and decreased size, including decreased forebrain (highlighted in red  
1468 on the control image) and midbrain (highlighted in yellow) area, compared with control  
1469 tadpoles. Pairwise knockdown of *fbxo45* and *ncbp2* enhanced these phenotypes, which were  
1470 also rescued with overexpression of *xiap*. (B) Box plot of forebrain area in *X. laevis* models  
1471 with knockdown of homologs of 3q29 genes, normalized to controls (n = 30–63, \*p < 0.05,  
1472 two-tailed Welch's T-test with Benjamini-Hochberg correction). Red box indicates rescue of  
1473 decreased *ncbp2* forebrain area with overexpression of the apoptosis inhibitor *xiap*. (C) Box  
1474 plot of midbrain area in *X. laevis* models with knockdown of homologs of 3q29 genes,  
1475 normalized to controls (n = 30–63, \*p < 0.05, two-tailed Welch's T-test with Benjamini-  
1476 Hochberg correction). Red box indicates rescue of decreased *ncbp2* midbrain area with  
1477 overexpression of the apoptosis inhibitor *xiap*. (D) Western blot analysis of *X. laevis* whole  
1478 embryos show increased intensity of cleaved caspase-3 bands at 19kD and 17kD with  
1479 knockdown of homologs of 3q29 genes, including enhanced caspase-3 levels with  
1480 knockdown of multiple homologs of 3q29 genes and rescued levels with *xiap* overexpression.  
1481  $\beta$ -actin was used as a loading control on the same blot. Representative western blot images  
1482 shown are cropped; the full blots for both replicates are provided in **S12 Fig**. (E)

1483 Quantification of western blot band intensity for caspase-3 levels, normalized to the loading  
1484 control. Red box indicates rescue of increased caspase-3 levels with overexpression of the  
1485 apoptosis inhibitor *xiap*. All boxplots indicate median (center line), 25th and 75th percentiles  
1486 (bounds of box), and minimum and maximum (whiskers), with red dotted lines representing  
1487 the control median. The data shown for the brain area experiments represent pooled results of  
1488 three experimental batches, and were normalized to the respective controls from each batch.  
1489 *X. laevis* embryo diagrams were produced by Nieuwkoop and Farber [117] and provided by  
1490 Xenbase [120].

1491

1492 **Fig. 9. Interactions between *NCBP2* and other homologs of 3q29 genes contribute to**  
1493 **neurodevelopmental defects through conserved cellular pathways.**

1494 **(A)** We identified 44 interactions between pairs of *Drosophila* homologs of 3q29 genes. With  
1495 the exception of *Ulp1* (*SENP5*), the cellular phenotypes of each homolog were significantly  
1496 enhanced with simultaneous knockdown of *Cbp20*. While other homologs of 3q29 genes also  
1497 interact with each other, our data suggest that *Cbp20* is a key modulator of cellular  
1498 phenotypes within the deletion region. **(B)** Schematic representing the network context of  
1499 *NCBP2* and other genes in the 3q29 region towards neurodevelopmental phenotypes. We  
1500 propose that the effects of *NCBP2* disruption propagate through a network of functionally-  
1501 related genes, including other 3q29 genes (highlighted in blue), leading to a cascade of  
1502 disruptions in key biological mechanisms, including apoptosis and cell cycle pathways. These  
1503 pathways jointly contribute towards the observed neurodevelopmental phenotypes.

1504

1505 **SUPPORTING INFORMATION LEGENDS**

1506 **S1 Fig. Developmental defects in flies with tissue-specific knockdown of individual**  
1507 **homologs of 3q29 genes.**

1508 (A) Images of adult fly wings (scale bar = 500um) show a range of phenotypic defects due to  
1509 wing-specific *bx<sup>MS1096</sup>-GAL4* RNAi knockdown of fly homologs of 3q29 genes. (B) Adult  
1510 flies with pan-neuronal RNAi knockdown of *dlg1* showed approximately 30% lethality  
1511 between days 1-4 (one-way repeated measures ANOVA,  $p < 1 \times 10^{-4}$ ,  $df = 1$ ,  $F = 54.230$ ), which  
1512 was not observed in control *Elav-GAL4* or *Cbp20* knockdown flies. Data represented shows  
1513 mean  $\pm$  standard deviation of 10 independent groups of 10 flies for each homolog. (C)  
1514 Representative confocal images of larval eye discs stained with anti-chaoptin (scale  
1515 bar = 30  $\mu$ m) illustrate defects in axon targeting (highlighted by white arrows) from the retina  
1516 to the optic lobes of the brain upon eye-specific knockdown of fly homologs of 3q29 genes.  
1517 Note that  $n=8-20$  larval eye disc preparations were assessed for each RNAi line tested. A list  
1518 of full genotypes for fly crosses used in these experiments is provided in **S2 File**.

1519

1520 **S2 Fig. Examination of cellular phenotypes in the *Drosophila* eye.**

1521 We tested individual and pairwise knockdown of fly homologs of 3q29 genes for cellular  
1522 phenotypes in the adult, pupal and larval eyes. (A) We first used the *Flynotyper* software [53]  
1523 to quantify the degree of ommatidial disorganization leading to rough eye phenotypes in adult  
1524 flies, as represented by the distance and angles between adjacent ommatidia (yellow arrows).  
1525 (B) We next stained pupal eyes with anti-DLG to observe changes in the number and  
1526 arrangement of ommatidial cells, including cone cells (c), bristle cells (b), and primary,  
1527 secondary and tertiary cells (1,2,3). We also examined the organization of the photoreceptor  
1528 cells (R1-R7, with R8 not visible) in each ommatidium by staining the pupal eyes with  
1529 Phalloidin. (C) We finally stained larval eye discs with markers for cellular processes, such  
1530 as pH3 for proliferating cells and *dcp1* for apoptosis. As the progression of the  
1531 morphogenetic furrow (MF) across the larval eye discs leads to proliferation and  
1532 differentiation of photoreceptor neurons [121], we examined changes in the number of  
1533 stained cells posterior to the MF. (D) Scatter plot of *dcp1*, pH3, TUNEL, and BrdU-positive  
1534 cell counts in larval eye discs with knockdown of homologs of 3q29 genes quantified using  
1535 two ImageJ plugins, AnalyzeParticles and Image-based Tool for Counting Nuclei (ITCN). As  
1536 the two methods showed a strong correlation with each other (Pearson correlation,  $n=285$ ,  
1537  $r=0.736$ ,  $p < 2.2 \times 10^{-16}$ ), we used ITCN counts to display cell count data in the manuscript.

1538

1539 **S3 Fig. Phenotypic screening for flies with eye-specific knockdown of individual fly**  
1540 **homologs of 3q29 genes.**

1541 (A) Representative brightfield adult eye images of flies with *GMR-GAL4;UAS-Dicer2* RNAi  
1542 knockdown of fly homologs of 3q29 genes (scale bar = 100  $\mu$ m) show a wide range of  
1543 phenotypic severity. (B) Box plot of average ommatidial diameter in flies with *GMR-GAL4*  
1544 knockdown of select fly homologs of 3q29 genes is shown (n = 15, \*p < 0.05, two-tailed  
1545 Mann–Whitney test with Benjamini-Hochberg correction). (C) Box plot of phenotypic scores  
1546 derived from *Flynotyper* for eye-specific *dCad-GFP,GMR-GAL4* RNAi knockdown of 13 fly  
1547 homologs of 3q29 genes is shown (n = 5–20, \*p < 0.05, one-tailed Mann–Whitney test with  
1548 Benjamini-Hochberg correction). (D) Box plot of phenotypic scores derived from *Flynotyper*  
1549 for eye-specific *GMR-GAL4;UAS-Dicer2* (left) and *dCad-GFP,GMR-GAL4* (right) RNAi  
1550 knockdown of nine validation lines for fly homologs of 3q29 genes is shown (n = 5–14,  
1551 \*p < 0.05, one-tailed Mann–Whitney test with Benjamini-Hochberg correction). All boxplots  
1552 indicate median (center line), 25th and 75th percentiles (bounds of box), and minimum and  
1553 maximum (whiskers), with red dotted lines representing the control median. A list of full  
1554 genotypes for fly crosses used in these experiments is provided in **S2 File**.

1555

1556 **S4 Fig. Cellular phenotypes of flies with eye-specific knockdown of individual fly**  
1557 **homologs of 3q29 genes.**

1558 (A) Confocal images of pupal eyes (scale bar = 5  $\mu$ m) stained with anti-DLG illustrate a range  
1559 of defects in ommatidial organization upon *GMR-GAL4* RNAi knockdown of fly homologs  
1560 of 3q29 genes. Yellow circles indicate cone cell defects, white circles indicate bristle cell  
1561 defects, yellow arrows indicate rotation defects, and yellow arrowheads indicate secondary  
1562 cell defects. (B) Confocal images of pupal eyes (scale bar = 5  $\mu$ m) stained with Phalloidin  
1563 illustrate defects in photoreceptor cell count and organization upon knockdown of fly  
1564 homologs of 3q29 genes. (C) Confocal images of larval eye discs (scale bar = 30  $\mu$ m) stained  
1565 with anti-pH3 illustrate changes in cell proliferation upon knockdown of select fly homologs  
1566 of 3q29 genes. (D) Larval eye discs (scale bar = 30  $\mu$ m) stained with BrdU (top) and TUNEL  
1567 (bottom) illustrate abnormal cell cycle and apoptosis defects, respectively, due to eye-specific  
1568 knockdown of *Cbp20* and *dlg1*. (E) Box plot of BrdU-positive cells in the larval eye discs of  
1569 flies with knockdown of *dlg1* and *Cbp20* is shown (n = 7–12, \*p < 0.05, two-tailed Mann–  
1570 Whitney test with Benjamini-Hochberg correction). (F) Box plot of TUNEL-positive cells in  
1571 the larval eye discs of flies with knockdown of *dlg1* and *Cbp20* is shown (n = 8, \*p < 0.05,  
1572 two-tailed Mann–Whitney test with Benjamini-Hochberg correction). Results for the TUNEL



1573 staining experiments were replicated in an independent experimental batch (**S14 Fig**). All  
1574 boxplots indicate median (center line), 25th and 75th percentiles (bounds of box), and  
1575 minimum and maximum (whiskers), with red dotted lines representing the control median. A  
1576 list of full genotypes for fly crosses used in these experiments is provided in **S2 File**.

1577

1578 **S5 Fig. Cellular phenotypes of flies with wing-specific knockdown of individual fly**  
1579 **homologs of 3q29 genes.**

1580 (A) Larval wing discs (scale bar = 50  $\mu$ m) stained with pH3 illustrate abnormal cell  
1581 proliferation due to RNAi knockdown of select fly homologs of 3q29 genes, compared with  
1582 appropriate VDRC GD and KK *bx<sup>MS1096</sup>-GAL4* controls. We examined changes in the number  
1583 of stained cells within the wing pouch of the wing disc (white box), which becomes the adult  
1584 wing. (B) Box plot of pH3-positive cells in the larval wing discs of flies with knockdown of  
1585 select fly homologs of 3q29 genes is shown (n = 8–15, \*p < 0.05, two-tailed Mann–Whitney  
1586 test with Benjamini-Hochberg correction). (C) Larval wing discs (scale bar = 50  $\mu$ m) stained  
1587 with anti-dcp1 show abnormal apoptosis due to knockdown of select fly homologs of 3q29  
1588 genes compared with appropriate VDRC GD and KK *bx<sup>MS1096</sup>-GAL4* controls. (D) Box plot  
1589 of dcp1-positive cells in the larval wing discs of flies with knockdown of select fly homologs  
1590 of 3q29 genes is shown (n = 8–15, \*p < 0.05, two-tailed Mann–Whitney test with Benjamini-  
1591 Hochberg correction). *Cbp20* flies showed severe dcp1 staining across the entire wing pouch  
1592 and could not be quantified. All boxplots indicate median (center line), 25th and 75th  
1593 percentiles (bounds of box), and minimum and maximum (whiskers), with red dotted lines  
1594 representing the control median. A list of full genotypes for fly crosses used in these  
1595 experiments is provided in **S2 File**.

1596

1597 **S6 Fig. Phenotypic screening for pairwise interactions of homologs of 3q29 genes in the**  
1598 **adult fly eye.**

1599 (A) Heatmap showing average changes in phenotypic scores for pairwise *GMR-GAL4* RNAi  
1600 knockdown of fly homologs of 3q29 genes in the adult eye, compared with recombined lines  
1601 for individual homologs of 3q29 genes crossed with controls, is shown. Gray boxes indicate  
1602 crosses without available data. Crosses with the mutant line *Tsf2<sup>KG01571</sup>* are also included  
1603 along with RNAi lines for other homologs of 3q29 genes, as eye-specific RNAi knockdown  
1604 of *Tsf2* was lethal. (B-H) Box plots of phenotypic scores for pairwise knockdowns of  
1605 homologs of 3q29 genes compared with recombined lines for individual homologs of 3q29  
1606 genes crossed with controls are shown (n = 5–12, \*p < 0.05, two-tailed Mann–Whitney test

1607 with Benjamini-Hochberg correction). All boxplots indicate median (center line), 25th and  
1608 75th percentiles (bounds of box), and minimum and maximum (whiskers), with red dotted  
1609 lines representing the control median. A list of full genotypes for fly crosses used in these  
1610 experiments is provided in **S2 File**.

1611

1612 **S7 Fig. Validation lines for pairwise interactions of homologs of 3q29 genes in the adult**  
1613 **fly eye.**

1614 (A-F) Box plots of phenotypic scores for pairwise *GMR-GAL4* RNAi knockdown of select  
1615 fly homologs of 3q29 genes (*Cbp20*, *CG8888*, *dlg1*, *Fsn*, *Pak*, and *PIG-Z*) with validation  
1616 RNAi and mutant lines for other homologs of 3q29 genes, compared with recombined lines  
1617 for individual homologs of 3q29 genes crossed with controls, are shown ( $n = 4-14$ ,  $*p < 0.05$ ,  
1618 two-tailed Mann-Whitney test with Benjamini-Hochberg correction), are shown. These  
1619 crosses include flies homozygous for *Cbp20* RNAi as well as flies homozygous for *Cbp20*  
1620 RNAi and heterozygous for *dlg1* RNAi (green arrows). Note that the phenotypic scores  
1621 derived from *Flynotyper* may not accurately capture the necrotic patches observed in these  
1622 crosses. All boxplots indicate median (center line), 25th and 75th percentiles (bounds of box),  
1623 and minimum and maximum (whiskers), with red dotted lines representing the control  
1624 median. A list of full genotypes for fly crosses used in these experiments is provided in **S2**  
1625 **File**.

1626

1627 **S8 Fig. Transcriptome analysis of flies with knockdown of select homologs of 3q29**  
1628 **genes.**

1629 (A) Clusters of Gene Ontology terms enriched among differentially-expressed fly genes  
1630 (blue) and their corresponding human homologs (red) with individual and pairwise *Elav-*  
1631 *GAL4* RNAi knockdown of fly homologs of 3q29 genes ( $p < 0.05$ , Fisher's Exact test with  
1632 Benjamini-Hochberg correction) are shown. Black boxes indicate enrichment of each gene  
1633 set for clusters of Gene Ontology terms. Full lists of enriched GO terms are provided in **S3**  
1634 **File**. (B) Enrichments for shared and unique differentially-expressed fly genes (blue) and  
1635 their corresponding human homologs (red) with individual knockdown of *Cbp20* and *Fsn*, as  
1636 well as concomitant knockdown of *Cbp20/Fsn*, are shown. We found 229 genes uniquely  
1637 dysregulated in flies with pairwise knockdown of *Fsn* and *Cbp20*, which were enriched for  
1638 cell cycle function ( $p=0.011$  for fly gene enrichment and  $p=1.12 \times 10^{-8}$  for human homologs,  
1639 Fisher's Exact test with Benjamini-Hochberg correction). (C) Diagram showing human cell  
1640 cycle and apoptosis genes whose fly homologs are differentially expressed with knockdown

1641 of *Cbp20* and *Fsn*, as well as concomitant knockdown of *Cbp20/Fsn*. Red boxes indicate  
1642 apoptosis genes, green boxes indicate cell cycle genes, and yellow boxes indicate genes  
1643 associated with both functions. **(D)** Enrichments of human homologs of genes differentially  
1644 expressed in flies with knockdown of *Cbp20/Fsn* across different brain tissues and  
1645 developmental timepoints are shown (Specific Expression Analysis). The size of each  
1646 hexagon represents the number of genes preferentially expressed at each tissue and timepoint,  
1647 with concentric hexagons representing bins of genes with stronger levels of preferential  
1648 expression. The shading of each hexagon represents the enrichment of differentially-  
1649 expressed genes among genes preferentially expressed at each timepoint ( $p < 0.1$ , Fisher's  
1650 Exact test with Benjamini-Hochberg correction). A list of full genotypes for fly crosses used  
1651 in these experiments is provided in **S2 File**.

1652

1653 **S9 Fig. Cellular phenotypes for pairwise knockdowns of homologs of 3q29 genes.**

1654 **(A)** Box plot showing the area of necrotic patches in adult fly eyes with pairwise knockdown  
1655 of homologs of 3q29 genes ( $n = 5-13$ ,  $*p < 0.05$ , one-tailed Mann-Whitney test with  
1656 Benjamini-Hochberg correction). Flies with knockdown of *Cbp20* and *Fsn*, *dlg1* and *arm*  
1657 showed enhanced necrotic patches compared with knockdown of *Cbp20*, while homozygous  
1658 *Cbp20* RNAi and concomitant knockdown of *dlg1* showed increased necrotic patches  
1659 compared with homozygous *Cbp20* RNAi. Furthermore, flies with knockdown of *dlg1* and  
1660 *arm* both showed enhanced necrotic patches compared with individual knockdown of *dlg1* or  
1661 *arm*. **(B)** Confocal images of pupal eyes (scale bar = 5  $\mu\text{m}$ ) stained with anti-DLG (top) and  
1662 Phalloidin (bottom) illustrate enhanced defects in ommatidial and photoreceptor cell  
1663 organization with concomitant *GMR-GAL4* RNAi knockdown of *Cbp20* and other fly  
1664 homologs of 3q29 genes compared with *Cbp20* knockdown. **(C)** Larval eye discs (scale  
1665 bar = 30  $\mu\text{m}$ ) stained with TUNEL show increases in apoptosis with pairwise knockdown of  
1666 *Cbp20* and other fly homologs of 3q29 genes compared with recombined *Cbp20* knockdown  
1667 crossed with control. **(D)** Box plot of TUNEL-positive cells in the larval eye discs of flies  
1668 with pairwise knockdown of homologs of 3q29 genes ( $n = 9-13$ ,  $*p < 0.05$ , two-tailed Mann-  
1669 Whitney test with Benjamini-Hochberg correction). All boxplots indicate median (center  
1670 line), 25th and 75th percentiles (bounds of box), and minimum and maximum (whiskers),  
1671 with red dotted lines representing the control median. A list of full genotypes for fly crosses  
1672 used in these experiments is provided in **S2 File**.

1673

1674

1675 **S10 Fig. Rescue of cellular phenotypes due to knockdown of fly homologs of 3q29 genes**  
1676 **with overexpression of *Diap1*.**

1677 (A) Cellular phenotypes of flies with overexpression of *Diap1* and *Dronc*. Representative  
1678 brightfield adult eye images (scale bar = 100  $\mu\text{m}$ ) and confocal images of larval eye discs  
1679 (scale bar = 30  $\mu\text{m}$ ) stained with anti-dcp1 are shown for flies with *GMR-GAL4*  
1680 overexpression of *Diap1* and *Dronc*, while confocal images of pupal eyes (scale bar = 5  $\mu\text{m}$ )  
1681 stained with anti-DLG are also shown for flies with overexpression of *Diap1*. While the  
1682 overexpression of *Diap1* did not lead to any changes in the pupal or adult eye phenotype,  
1683 overexpression of *Dronc* resulted in a large increase in apoptosis and depigmentation in the  
1684 adult eye. (B) Box plot of *Flynotyper* distance ommatidial disorderliness (OD) scores for flies  
1685 with concomitant *GMR-GAL4* RNAi knockdown of *Cbp20* or *dlg1* and overexpression of  
1686 *Diap1* or *Dronc* is shown ( $n = 8-9$ ,  $*p < 0.05$ , two-tailed Mann-Whitney test with Benjamini-  
1687 Hochberg correction). (C) Box plot of *Flynotyper* angle OD scores for flies with knockdown  
1688 of *Cbp20* or *dlg1* and overexpression of *Diap1* or *Dronc* is shown ( $n = 8-9$ ,  $*p < 0.05$ , two-  
1689 tailed Mann-Whitney test with Benjamini-Hochberg correction). The distance and angle OD  
1690 scores, component subscores derived from *Flynotyper* [53], mirror the trends observed in the  
1691 overall phenotypic scores (Figure 6B). (D) Box plot of adult eye area in flies with  
1692 knockdown of *Cbp20* or *dlg1* and overexpression of *Diap1* or *Dronc* is shown ( $n = 8-9$ ,  
1693  $*p < 0.05$ , two-tailed Mann-Whitney test with Benjamini-Hochberg correction). (E) Confocal  
1694 images of pupal eyes (scale bar = 5  $\mu\text{m}$ ) stained with Phalloidin illustrate the rescue of  
1695 photoreceptor cell organization defects due to knockdown of *Cbp20* or *dlg1* upon  
1696 overexpression of *Diap1*. (F) Larval eye discs (scale bar = 30  $\mu\text{m}$ ) stained with TUNEL show  
1697 rescue of apoptosis phenotypes observed in flies with knockdown of *Cbp20* or *dlg1* and  
1698 overexpression of *Diap1*, as well as enhanced apoptosis with overexpression of *Dronc*. (G)  
1699 Box plot of TUNEL-positive cells in the larval eye discs of flies with knockdown of *Cbp20*  
1700 or *dlg1* and overexpression of *Diap1* or *Dronc* is shown ( $n = 7-10$ ,  $*p < 0.05$ , two-tailed  
1701 Mann-Whitney test with Benjamini-Hochberg correction). All boxplots indicate median  
1702 (center line), 25th and 75th percentiles (bounds of box), and minimum and maximum  
1703 (whiskers), with red dotted lines representing the control median. A list of full genotypes for  
1704 fly crosses used in these experiments is provided in S2 File.

1705

1706 **S11 Fig. Phenotypic scores for interactions between homologs of 3q29 genes and known**  
1707 **neurodevelopmental genes in the adult fly eye.**

1708 (A-D) Box plots of phenotypic scores for concomitant *GMR-GAL4* RNAi knockdown of fly

1709 homologs of 3q29 genes and neurodevelopmental genes, compared with recombined lines for  
1710 individual homologs of 3q29 genes crossed with controls, are shown ( $n = 2-10$ ,  $*p < 0.05$ ,  
1711 two-tailed Mann–Whitney test with Benjamini-Hochberg correction). All boxplots indicate  
1712 median (center line), 25th and 75th percentiles (bounds of box), and minimum and maximum  
1713 (whiskers), with red dotted lines representing the control median. A list of full genotypes for  
1714 fly crosses used in these experiments is provided in **S2 File**.

1715

1716 **S12 Fig. Quantification of 3q29 morpholino knockdown and apoptosis marker levels in**  
1717 ***X. laevis* models.**

1718 (A) Electrophoretic gels show decreased expression of homologs of 3q29 genes due to  
1719 morpholino (MO) knockdown at various concentrations in *X. laevis* embryos. Three  
1720 replicates (uninjected and two MO concentrations) were performed for each morpholino, and  
1721 band intensities were compared with expression of *ODC1* controls taken from the same  
1722 cDNA samples and run on gels processed in parallel. (B) Quantification of expression for  
1723 homologs of 3q29 genes at different MO concentrations, as measured by band intensity ratio  
1724 to *ODC1* controls ( $n=3$  replicates,  $*p < 0.05$ , two-tailed Welch's T-test with Benjamini-  
1725 Hochberg correction). (C) Full images of western blots for quantification of cleaved caspase-  
1726 3 levels in *X. laevis* embryos with MO knockdown of homologs of 3q29 genes. Two replicate  
1727 experiments were performed, and the intensity of bands at 19kD and 17kD (green arrows),  
1728 corresponding with cleaved caspase-3, were normalized to those for the  $\beta$ -actin loading  
1729 controls. Embryos injected with control MO, uninjected embryos, and embryos treated with  
1730 30% EtOH as a positive control were included with the embryos injected with 3q29 MOs.

1731

1732 **S13 Fig. Eye phenotypes observed with knockdown of homologs of 3q29 genes in *X.***  
1733 ***laevis* models.**

1734 (A) Representative eye images of stage 42 *X. laevis* tadpoles with MO knockdown of  
1735 homologs of 3q29 genes (scale bar = 500  $\mu\text{m}$ ) show defects in eye size and morphology  
1736 compared with the control (top). These defects were rescued with co-injection and  
1737 overexpression of mRNA for homologs of 3q29 genes, as well as overexpression of the  
1738 apoptosis inhibitor *xiap* for *ncbp2* (bottom). (B) Box plot of eye area in *X. laevis* models with  
1739 knockdown of homologs of 3q29 genes, normalized to controls, is shown ( $n = 48-71$ ,  
1740  $*p < 0.05$ , two-tailed Welch's T-test with Benjamini-Hochberg correction). Models with  
1741 *ncbp2* knockdown and *xiap* overexpression showed an increased eye size compared with  
1742 *ncbp2* knockdown. (C) Box plot of eye area in *X. laevis* models with knockdown of

1743 homologs of 3q29 genes and overexpression of mRNA for homologs of 3q29 genes,  
1744 normalized to controls, is shown ( $n = 56-63$ ,  $*p < 0.05$ , two-tailed Welch's T-test with  
1745 Benjamini-Hochberg correction). All boxplots indicate median (center line), 25th and 75th  
1746 percentiles (bounds of box), and minimum and maximum (whiskers), with red dotted lines  
1747 representing the control median. The data shown for the eye area experiments represent  
1748 pooled results of three experimental batches, and were normalized to the respective controls  
1749 from each batch.

1750

1751 **S14 Fig. Replication of *Drosophila* experimental results for individual and pairwise**  
1752 **knockdown of homologs of 3q29 genes.**

1753 (A) Replication dataset for climbing ability of select homologs of 3q29 genes over ten days.  
1754 We replicated the defects in climbing ability observed with pan-neuronal RNAi knockdown  
1755 of *Cbp20* and *dlg1*, while climbing defects in flies with knockdown of *Fsn* flies were not  
1756 replicated in the second experimental batch and were therefore excluded from the main  
1757 dataset (Fig. 2B). Data represented show mean  $\pm$  standard deviation of 7-10 independent  
1758 groups of 10 flies for each homolog. (B) Replication dataset for climbing ability of pairwise  
1759 knockdown of homologs of 3q29 genes over ten days. We replicated the defects in climbing  
1760 ability observed with pan-neuronal RNAi knockdown of *Cbp20/dlg1* and *Cbp20/Fsn*  
1761 compared with recombined *Cbp20* knockdown crossed with control (Fig. 3F). Data  
1762 represented show mean  $\pm$  standard deviation of 5 independent groups of 10 flies for each  
1763 homolog. (C) Replication dataset for adult eye area in flies with *GMR-GAL4* RNAi  
1764 knockdown of homologs of 3q29 genes ( $n = 10-14$ ,  $*p < 0.05$ , two-tailed Mann-Whitney test  
1765 with Benjamini-Hochberg correction). We replicated the decreased eye sizes in flies with  
1766 knockdown of *Cbp20* and *CG8888*, while flies with knockdown of *dlg1* showed a non-  
1767 significant ( $p=0.154$ ) increase in eye size (Fig. 2D). (D) Confocal images for replication  
1768 dataset larval eye discs (scale bar = 30  $\mu\text{m}$ ) stained with anti-pH3 (top) and TUNEL (bottom)  
1769 illustrate cellular defects posterior to the morphogenetic furrow (white box) upon knockdown  
1770 of select fly homologs of 3q29 genes (Fig. 2E). (E) Replication dataset for pH3-positive cells  
1771 in larval eye discs of flies with knockdown of homologs of 3q29 genes ( $n = 9-10$ , two-tailed  
1772 Mann-Whitney test with Benjamini-Hochberg correction). As in the main dataset (Fig. 2F),  
1773 we observed no significant changes in cell proliferation for flies with knockdown of *Cbp20*  
1774 and *dlg1*. (F) Replication dataset for TUNEL-positive cells in larval eye discs of flies with  
1775 knockdown of homologs of 3q29 genes ( $n = 6-8$ ,  $*p < 0.05$ , two-tailed Mann-Whitney test  
1776 with Benjamini-Hochberg correction). We replicated the increased apoptosis phenotypes

1777 observed with knockdown of *Cbp20* and *dlg1* (**S4 Fig.**). All boxplots indicate median (center  
1778 line), 25th and 75th percentiles (bounds of box), and minimum and maximum (whiskers),  
1779 with red dotted lines representing the control median. A list of full genotypes for fly crosses  
1780 used in these experiments is provided in **S2 File**.

1781

1782 **S1 Table. *Drosophila* homologs of human 3q29 genes and expression of *Drosophila***  
1783 **homologs during development.**

1784 DIOPT version 7.1 [100] and reciprocal BLAST were used to identify fly homologs of genes  
1785 within the 3q29 region; six genes did not have fly homologs. Expression levels of fly  
1786 homologs of 3q29 genes were assessed using high-throughput expression data from FlyAtlas  
1787 Anatomy microarray expression data [104] and modENCODE Anatomy RNA-Seq data [105]  
1788 from FlyBase.

1789

1790 **S2 Table. qPCR primers and expression values for RNAi knockdown of fly homologs of**  
1791 **3q29 genes.**

1792 *Elav-GAL4* flies were crossed with RNAi lines of fly homologs of 3q29 genes at 25°C, and 3-  
1793 4 day old adult *Drosophila* heads were used to quantify the level of expression compared  
1794 with *Elav-GAL4* controls. *Elav-GAL4;;UAS-Dicer2* flies crossed with *CG5359* flies showed  
1795 overexpression of *tiptop* [103] and were therefore excluded from further experiments. A list  
1796 of full genotypes for fly crosses used in these experiments is provided in **S2 File**, and  
1797 statistics for these data are provided in **S5 File**.

1798

1799 **S3 Table. Comparison of animal model phenotypes with knockdown or knockout of**  
1800 **homologs of 3q29 genes.**

1801 Blue shaded boxes indicate previously identified phenotypes for individual homologs of 3q29  
1802 genes, while “X” marks indicate recapitulated and novel phenotypes identified in our study.  
1803 Gray-shaded boxes indicate that a homolog was not present in the model organism. Fly  
1804 phenotypes were obtained from FlyBase [122], *X. laevis* phenotypes were obtained from  
1805 Xenbase [120], and mouse knockout model phenotypes were obtained from the Mouse  
1806 Genome Informatics database [123].

1807

1808 **S4 Table. Summary of scoring for phenotypic severity of axon targeting defects upon**  
1809 **individual and pairwise knockdown of homologs of 3q29 genes.**

1810 Individual larval eye disc images were assigned mild, moderate or severe scores based on the

1811 severity of axon projection loss observed in each eye disc (see Methods). We found that the  
1812 mild to moderate defects observed with knockdown of *Cbp20* were enhanced with  
1813 concomitant knockdown of *dlg1* or *Fsn*, while *Diap1* overexpression partially rescued the  
1814 defects observed with knockdown of *Cbp20* or *dlg1*. A list of full genotypes for fly crosses  
1815 used in these experiments is provided in **S2 File**.

1816

1817 **S5 Table. Comparison of eye phenotypic scores for homologs of 3q29 genes and**  
1818 **neurodevelopmental genes.**

1819 Table comparing *Flynotyper* scores for flies with *GMR-GAL4;UAS-Dicer2* RNAi knockdown  
1820 of homologs of 3q29 genes (shaded in grey) with previously published scores for flies with  
1821 *GMR-GAL4;UAS-Dicer2* RNAi knockdown of homologs of candidate neurodevelopmental  
1822 genes [53].

1823

1824 **S6 Table. Analysis of defects in ommatidial cells with *GMR-GAL4* RNAi knockdown of**  
1825 **fly homologs of 3q29 genes.**

1826 The number of “+” symbols displayed in the table indicate the severity of the observed  
1827 cellular defects. Note that n=4-16 pupal eye preparations were assessed for each RNAi line  
1828 tested. A list of full genotypes for fly crosses used in these experiments is provided in **S2**  
1829 **File**.

1830

1831 **S7 Table. Screening for pairwise interactions among fly homologs of 3q29 genes.**

1832 “All interactions” indicates the number of pairwise crosses where at least one second-hit  
1833 RNAi or mutant line showed enhancement of the single-hit phenotype, while “Validated”  
1834 indicates the number of interactions which have two or more crosses with a second-hit RNAi  
1835 or mutant line (if available) showing the same result. “Reciprocal cross” indicates the number  
1836 of interactions with concordant results across pairs of reciprocal cross (i.e. *Cbp20/dlg1* vs.  
1837 *dlg1/Cbp20*). These totals include crosses with the mutant line *Tsf2*<sup>KG01571</sup>, as eye-specific  
1838 RNAi knockdown of *Tsf2* was lethal, as well as flies heterozygous for *dlg1* RNAi and  
1839 homozygous for *Cbp20* RNAi. Crosses with other RNAi or mutant lines for the same  
1840 homolog (shaded in grey) are included as validation lines tested but were not counted as  
1841 interactions. A list of full genotypes for fly crosses used in these experiments is provided in  
1842 **S2 File**.

1843



1844 **S8 Table. Analysis of defects in ommatidial cells with pairwise *GMR-GAL4* RNAi**  
1845 **knockdown of fly homologs of 3q29 genes.**

1846 The number of “+” symbols displayed in the table indicate the severity of the observed  
1847 cellular defects. Note that n=4-16 pupal eye preparations were assessed for each interaction  
1848 cross tested. A list of full genotypes for fly crosses used in these experiments is provided in  
1849 **S2 File.**

1850

1851 **S9 Table. Screening for interactions between fly homologs of 3q29 genes and other**  
1852 **known neurodevelopmental genes.**

1853 “All interactions” indicates the number of crosses where at least one second-hit RNAi line  
1854 showed enhancement of the single-hit phenotype, while “Validated interactions” indicates the  
1855 number of interactions which have two or more crosses with a second-hit RNAi or mutant  
1856 line (if available) showing the same result. Results from two distinct fly homologs of  
1857 *CHRNA7* that were crossed with homologs of 3q29 genes, *nAChRa6* and *nAChRa7*, were  
1858 combined for the final number of interactions. Shaded interactions indicate pairwise crosses  
1859 where the phenotypes observed with knockdown of the homolog for the neurodevelopmental  
1860 gene by itself were suppressed with concomitant knockdown of homologs for 3q29 genes.  
1861 The neurodevelopmental genes are annotated for cell cycle/apoptosis function (Gene  
1862 Ontology terms GO:0007049 and GO:0006915) and association with microcephaly disorders  
1863 [65]. A list of full genotypes for fly crosses used in these experiments is provided in **S2 File.**

1864

1865 **S10 Table. Developmental phenotypes observed in mouse models of the 3q29 deletion**  
1866 **and individual homologs of 3q29 genes.**

1867 Comparison of mice with heterozygous deletion of the syntenic 3q29 region [14,15] with  
1868 heterozygous knockout mouse models for *Dlg1* [14] and *Pak2* [72]. Blue shaded boxes  
1869 indicate phenotypes observed in the knockout models, while gray-shaded boxes indicate a  
1870 phenotype that was not tested in the knockout model. Neither *Dlg1*<sup>+/-</sup> nor *Pak2*<sup>+/-</sup> knockout  
1871 mice recapitulate the body and brain weight, spatial learning and memory, or acoustic startle  
1872 defects observed in the deletion mouse models.

1873

1874 **S11 Table. Summary of apoptosis function enrichment among candidate**  
1875 **neurodevelopmental genes.**

1876 This table shows the number of candidate autism, intellectual disability and schizophrenia  
1877 genes annotated for apoptosis function. The minimum, mean and maximum numbers of

1878 apoptosis genes in 100,000 simulated sets of candidate genes are shown, along with the  
1879 percentiles and empirical p-values of the observed overlap with apoptosis genes for each  
1880 simulation.

1881

1882 **S12 Table. Morpholinos used for *X. laevis* experiments.**

1883

1884 **S13 Table. qPCR primers used for *X. laevis* experiments.**

1885

1886 **S1 File. Pathogenicity metrics, mutations in disease cohorts, and biological functions of**  
1887 **3q29 genes.**

1888 3q29 genes with Residual Variation Intolerance Scores (RVIS) <20<sup>th</sup> percentile [124] or  
1889 probability of Loss-of-function Intolerant (pLI) scores >0.9 [125] are considered to be  
1890 potentially pathogenic in humans and are shaded in gray. Mutations within 3q29 genes  
1891 identified in disease cohorts were curated from three databases: denovo-db v.1.6.1 [75],  
1892 GeneBook database ([http://atgu.mgh.harvard.edu/~spurcell/genebook/](http://atgu.mgh.harvard.edu/~spurcell/genebook/genebook.cgi)  
1893 [genebook.cgi](http://atgu.mgh.harvard.edu/~spurcell/genebook/genebook.cgi)), and SFARI Gene [77]. Molecular functions for 3q29 genes were derived from  
1894 RefSeq, UniProtKB and Gene Ontology (GO) individual gene summaries [126–128], and  
1895 GO-SLIM terms for human genes and fly homologs were curated from PantherDB [101].  
1896 Annotations for cell cycle/apoptosis and neuronal function were derived from GO Biological  
1897 Process annotations for each gene.

1898

1899 **S2 File. List of fly stocks and full genotypes for all crosses tested.**

1900 This file lists the stock lines, stock center, and genotypes for primary and validation lines for  
1901 fly homologs of 3q29 genes as well as neurodevelopmental and apoptosis genes outside of  
1902 the 3q29 region. Full genotypes for the generated recombined lines as well as all individual  
1903 and pairwise crosses tested in the manuscript are also listed in the file. BDSC: Bloomington  
1904 *Drosophila* Stock Center; VDRC: Vienna *Drosophila* Resource Centre.

1905

1906 **S3 File. Transcriptome analysis of flies with knockdown of homologs of 3q29 genes.**

1907 This file lists all differentially expressed genes from RNA sequencing of flies with *Elav-*  
1908 *GAL4* RNAi knockdown of homologs of 3q29 genes, as defined by log-fold change >1 or <-  
1909 1 and false discovery rate (FDR) <0.05 (Benjamini-Hochberg correction). Human homologs  
1910 identified using DIOPT are included for each differentially-expressed fly gene. The file also  
1911 includes enriched Gene Ontology (GO) terms (p<0.05, Fisher's Exact test with Benjamini-

1912 Hochberg correction) for each set of differentially-expressed fly genes, as well as lists of GO  
1913 terms enriched among their corresponding human homologs.

1914

1915 **S4 File. List of candidate neurodevelopmental genes with apoptosis function.**

1916 This file lists 525 candidate neurodevelopmental genes that are annotated for apoptosis GO  
1917 terms, including their membership within pathogenic CNV regions.

1918

1919 **S5 File. Statistical analysis of experimental data.**

1920 This file shows all statistical information (sample size, mean/median/standard deviation of  
1921 datasets, Shapiro-Wilk test statistics for normality, controls used, test statistics, p-values,  
1922 confidence intervals, and Benjamini-Hochberg FDR corrections) for all data presented in the  
1923 main and supplemental figures. Statistical information for ANOVA tests includes factors,  
1924 degrees of freedom, test statistics, and post-hoc pairwise t-tests with Benjamini-Hochberg  
1925 correction.

1926

1927 **S1 Video. Climbing ability of flies with knockdown of individual homologs of 3q29  
1928 genes.**

1929 This video shows the climbing ability of *Elav-GAL4* control, *Cbp20* and *dlg1* individual  
1930 RNAi knockdown flies at day 10 of the climbing ability experiments.

1931

1932 **S2 Video. Climbing ability of flies with pairwise knockdowns of homologs of 3q29 genes.**

1933 This video shows the climbing ability of *Cbp20/dlg1* and *Cbp20/Fsn* pairwise *Elav-GAL4*  
1934 RNAi knockdown flies at day 10 of the climbing ability experiments.

1935

**Table 1.** Summary of major experiments for knockdown of homologs of 3q29 genes show widespread cellular and neuronal defects.

| Experiment                             |                              | RNAi knockdown of <i>Drosophila</i> homologs of 3q29 genes      |                                      |                                       |                                  |                             |                    |                    |
|----------------------------------------|------------------------------|-----------------------------------------------------------------|--------------------------------------|---------------------------------------|----------------------------------|-----------------------------|--------------------|--------------------|
| Phenotype                              | Assay                        | <i>Cbp20</i>                                                    | <i>dlg1</i>                          | <i>Cbp20/dlg1</i>                     | <i>Cbp20/Fsn</i>                 | <i>Cbp20/CG8888</i>         | <i>Cbp20/Diap1</i> | <i>dlg1/Diap1</i>  |
| Adult eye morphology                   | Rough eye phenotype          | Rough eye                                                       | Rough eye                            | Enhanced rough eye                    | Enhanced rough eye               | Enhanced rough eye          | Rescue             | Rescue             |
|                                        | Necrotic patches             | None (Present in homozygous KD)                                 | None                                 | Yes (more severe in homozygous KD)    | Yes                              | None                        | None               | None               |
|                                        | Eye area                     | Decreased area                                                  | Increased area                       | NA                                    | NA                               | NA                          | Rescue             | Rescue             |
| Neuronal phenotypes                    | Climbing ability             | Climbing defects                                                | Climbing defects                     | Enhanced climbing defects             | Enhanced climbing defects        | NA                          | NA                 | NA                 |
|                                        | Axonal targeting             | Axon targeting defects                                          | Axon targeting defects               | Enhanced targeting defects            | Enhanced targeting defects       | NA                          | Rescue             | Rescue             |
| Cell organization (pupal eye)          | DLG staining                 | Cellular defects                                                | Cellular defects                     | Enhanced cellular defects             | Enhanced cellular defects        | Enhanced cellular defects   | Rescue             | Rescue             |
|                                        | Phalloidin staining          | Loss of photoreceptors                                          | Loss of photoreceptors               | No change                             | Enhanced photoreceptor loss      | Enhanced photoreceptor loss | Rescue             | Rescue             |
| Cell cycle (larval eye disc)           | pH3 staining                 | No change                                                       | No change                            | No change                             | No change                        | Decreased proliferation     | NA                 | NA                 |
|                                        | BrdU staining                | No change                                                       | Increased proliferation              | NA                                    | NA                               | NA                          | NA                 | NA                 |
| Apoptosis (larval eye disc)            | dcp1 staining                | Increased apoptosis                                             | Increased apoptosis                  | Increased apoptosis                   | Increased apoptosis              | Increased apoptosis         | Rescue             | Rescue             |
|                                        | TUNEL assay                  | Increased apoptosis                                             | Increased apoptosis                  | Increased apoptosis                   | Increased apoptosis              | Increased apoptosis         | Rescue             | Rescue             |
| Cellular phenotypes (larval wing disc) | pH3 staining                 | Decreased proliferation                                         | Increased proliferation              | NA                                    | NA                               | NA                          | NA                 | NA                 |
|                                        | dcp1 staining                | Increased apoptosis                                             | Increased apoptosis                  | NA                                    | NA                               | NA                          | NA                 | NA                 |
| RNA sequencing (adult heads)           | Differential gene expression | Synaptic transmission, metabolism                               | Synaptic transmission, ion transport | Cellular respiration, protein folding | Cell cycle, response to stimulus | NA                          | NA                 | NA                 |
| Experiment                             |                              | Morpholino knockdown of <i>X. laevis</i> homologs of 3q29 genes |                                      |                                       |                                  |                             |                    |                    |
| Phenotype                              | Assay                        | <i>ncbp2</i>                                                    | <i>fbxo45</i>                        | <i>pak2</i>                           | <i>ncbp2/fbxo45</i>              | <i>ncbp2/pak2</i>           | <i>ncbp2/xiap</i>  | <i>fbxo45/xiap</i> |
| Craniofacial morphology                | Eye area                     | Decreased area                                                  | Decreased area                       | Decreased area                        | NA                               | NA                          | Rescue             | NA                 |
|                                        | Midbrain area                | Decreased area                                                  | Decreased area                       | Decreased area                        | No change                        | No change                   | Rescue             | NA                 |
|                                        | Forebrain area               | Decreased area                                                  | Decreased area                       | Decreased area                        | Decreased area                   | No change                   | Rescue             | NA                 |
| Apoptosis                              | Cleaved caspase-3 levels     | Increased caspase-3                                             | Increased caspase-3                  | NA                                    | Increased caspase-3              | NA                          | Rescue             | Rescue             |

**Fig. 1**

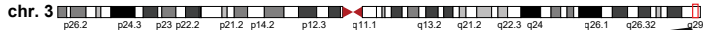

Tested *Drosophila* homologs

Tested *X. laevis* homologs

|          |         |        |          |         |        |      |       |        |        |        |         |       |       |      |       |       |       |      |      |        |
|----------|---------|--------|----------|---------|--------|------|-------|--------|--------|--------|---------|-------|-------|------|-------|-------|-------|------|------|--------|
| ZDHHHC19 | OStalpa | PCYT1A | TCTEX1D2 | TM4SF19 | UBXN7  | TFRC | SMCO1 | RNF168 | WDR53  | FBXO45 | LRRRC33 | CEP19 | PIGX  | PAK2 | SENP5 | NCBP2 | PIGZ  | MF12 | DLG1 | BDH1   |
| app      | CG6836  | Pcy12  |          |         | CG8892 |      |       |        | CG5543 | Fsn    |         |       | PIG-X | Pak  | Ulp1  | Cbp20 | PIG-Z | Tsf2 | dgl1 | CG8888 |

Human genes

Fly homologs

***Drosophila* single-hit models**

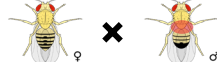

Tissue-specific GAL4

UAS-RNAi

***Drosophila* two-hit models**

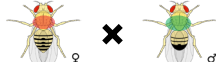

GMR-GAL4

UAS-RNAi B

**Global phenotype screening**

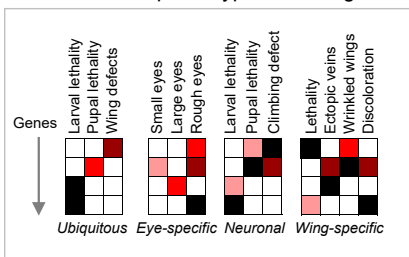

**Pairwise interaction screening**

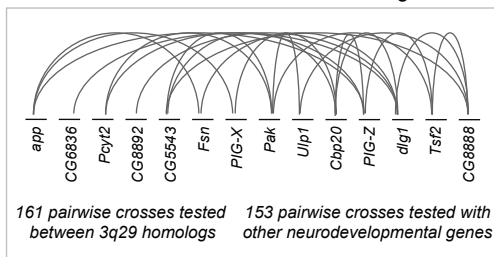

**Neuronal phenotypes**

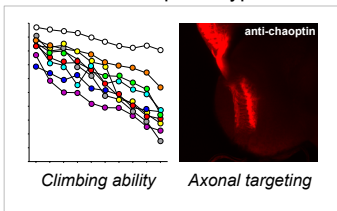

**Cellular phenotypes**

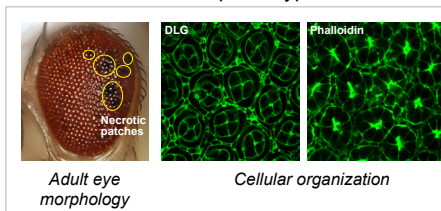

**Apoptosis and cell cycle mechanisms**

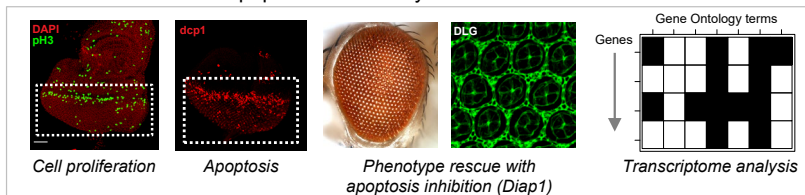

**Validation in *X. laevis* models**

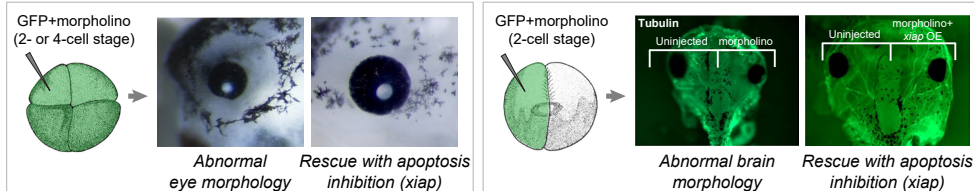

**Fig. 2**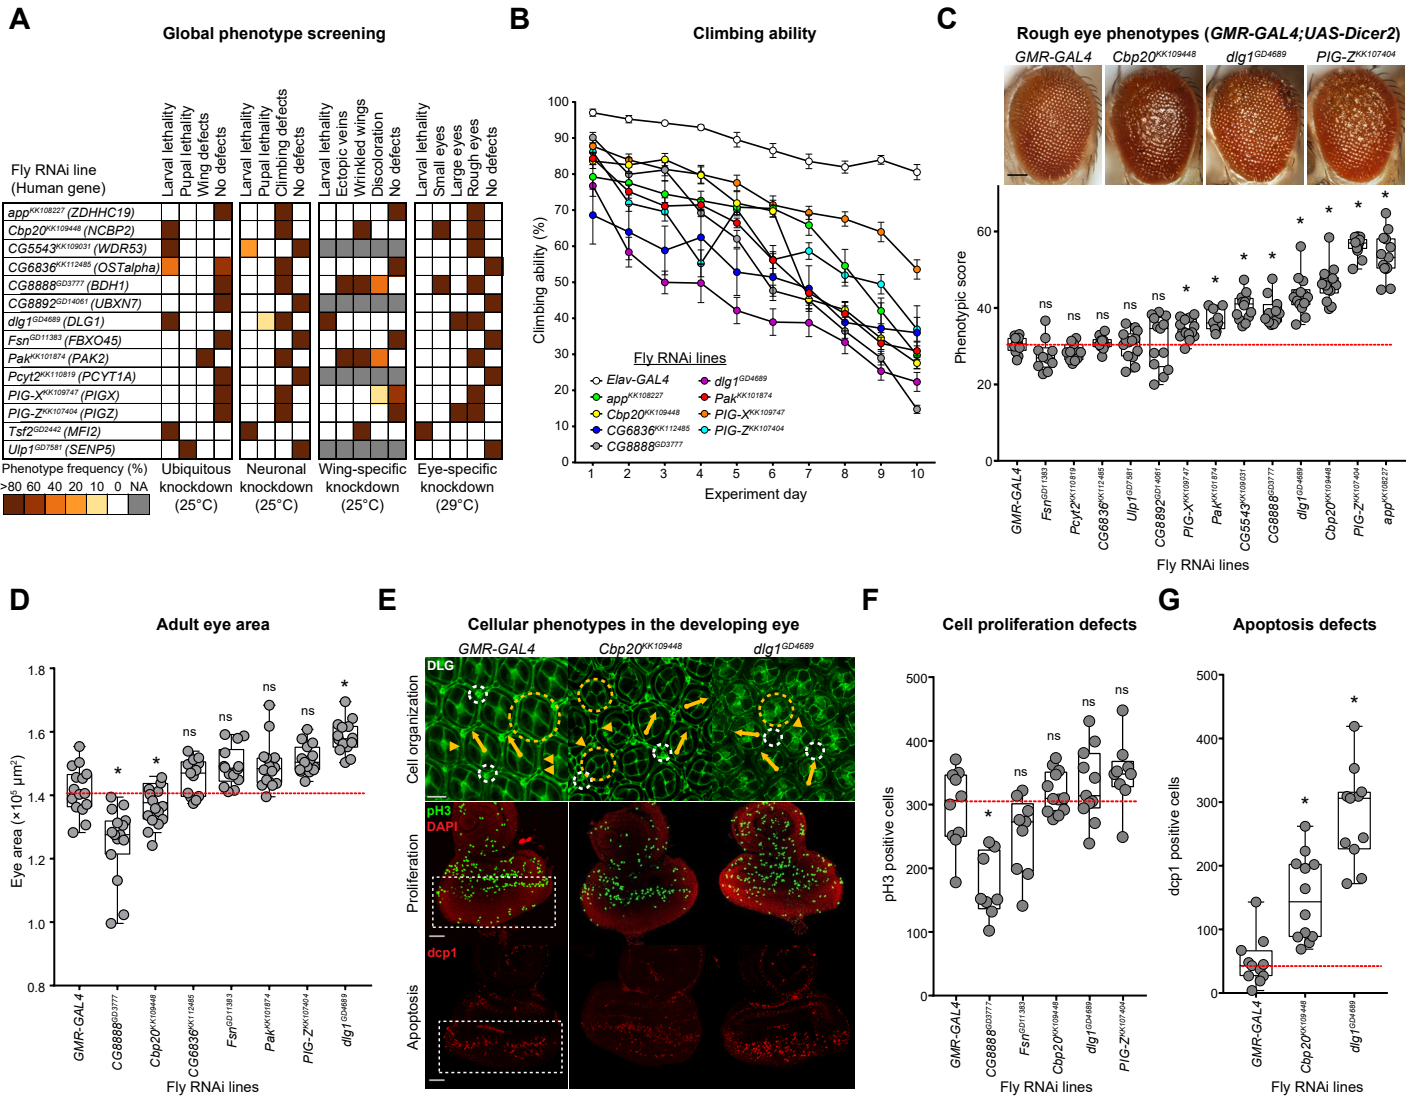

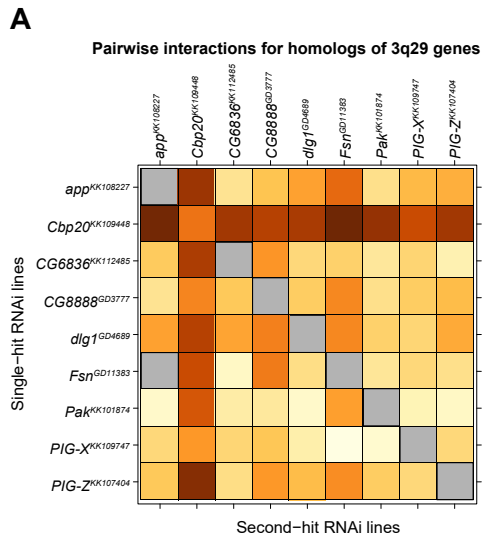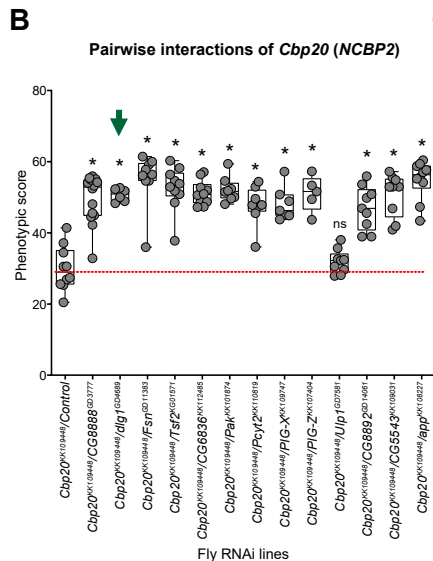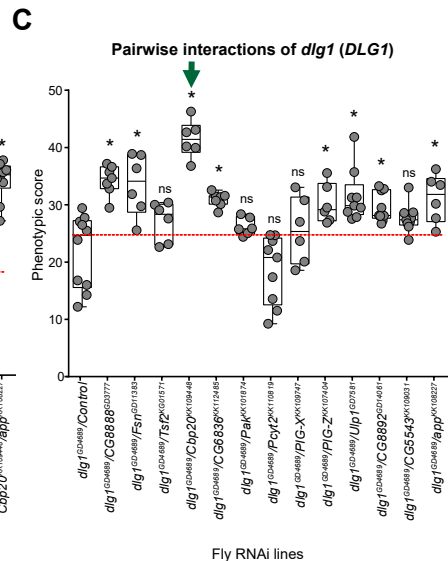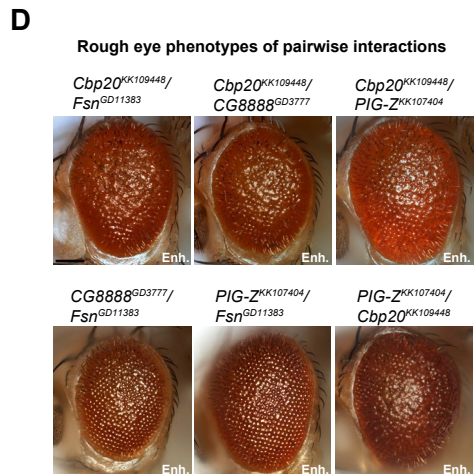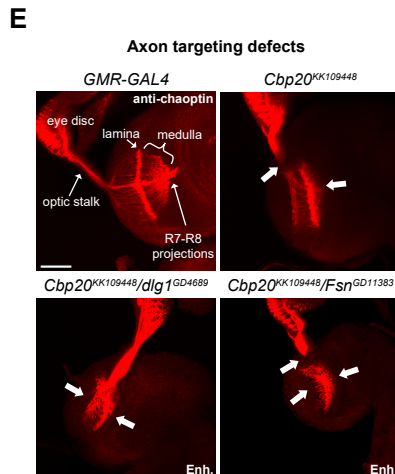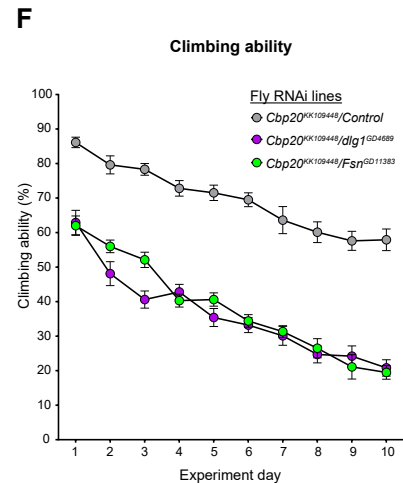

**Fig. 4****A****Human gene interaction network of 3q29 genes (GeneMania)**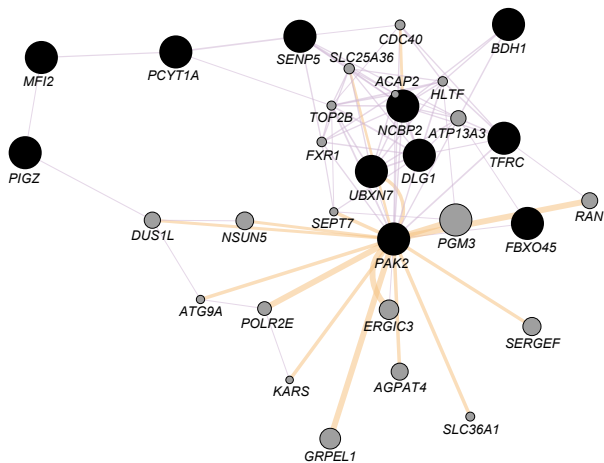**B****Human gene interaction network of 3q29 genes (GIANT)**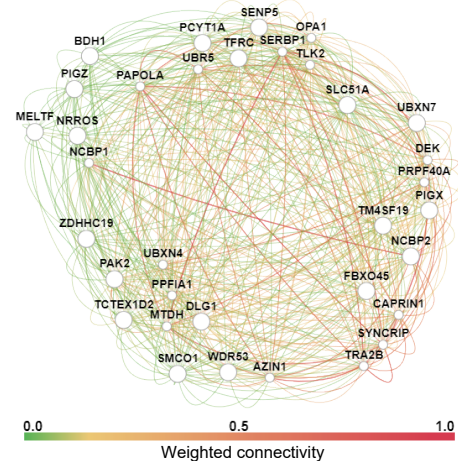**C****Average connectivity of CNV genes in human brain-specific network**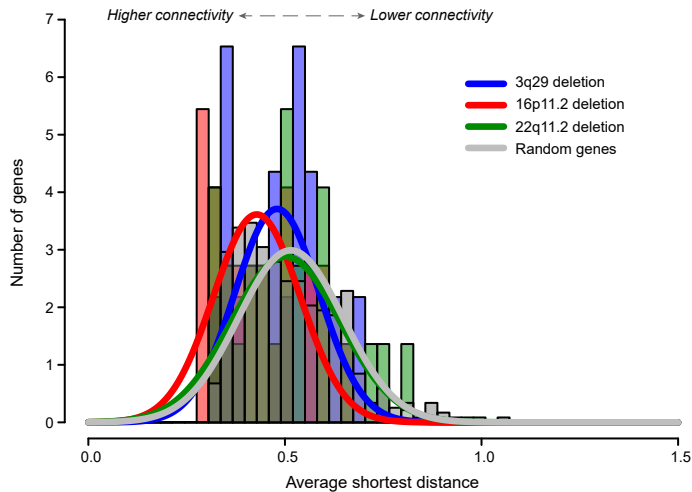**D****Connectivity of 3q29 genes in human brain-specific network**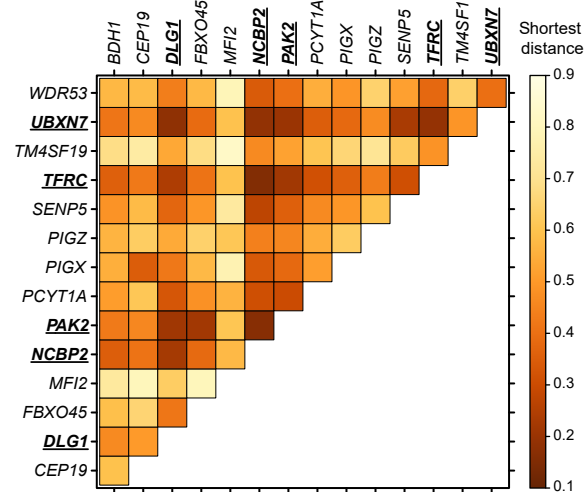



**Fig. 5****A****Necrotic patches in the adult eye***Cbp20*<sup>KK109448/Control</sup>*Cbp20*<sup>KK109448/dlg1<sup>GD4689</sup></sup>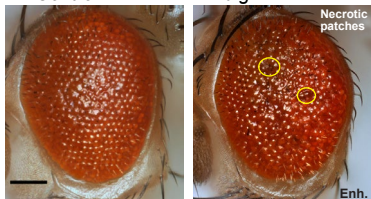Homozyg. *Cbp20*<sup>KK109448</sup>Homozyg. *Cbp20*<sup>KK109448/</sup>  
Heterozyg. *dlg1*<sup>GD4689</sup>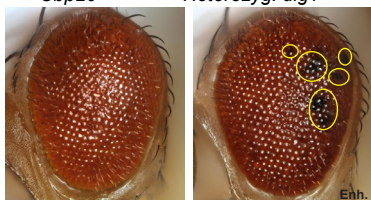**B****Cellular organization defects***Cbp20*<sup>KK109448</sup>*Cbp20*<sup>KK109448/</sup>  
*CG8888*<sup>GD3777</sup>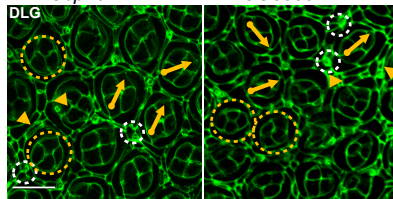*Cbp20*<sup>KK109448/</sup>  
*dlg1*<sup>GD4689</sup>*Cbp20*<sup>KK109448/</sup>  
*Fsn*<sup>GD11383</sup>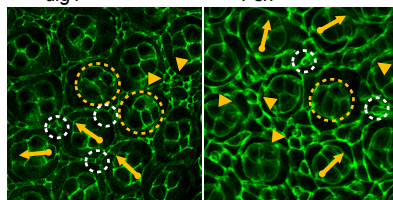**C****Photoreceptor cell defects***Cbp20*<sup>KK109448</sup>*Cbp20*<sup>KK109448/</sup>  
*CG8888*<sup>GD3777</sup>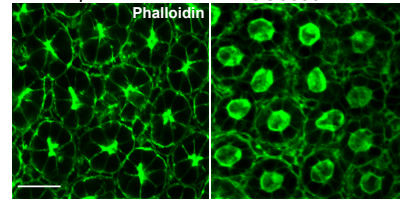*Cbp20*<sup>KK109448/</sup>  
*dlg1*<sup>GD4689</sup>*Cbp20*<sup>KK109448/</sup>  
*Fsn*<sup>GD11383</sup>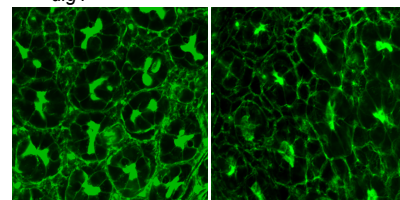**D****Cellular phenotypes of pairwise knockdowns in the larval eye disc***Cbp20*<sup>KK109448/Control</sup>*Cbp20*<sup>KK109448/</sup>  
*CG8888*<sup>GD3777</sup>*Cbp20*<sup>KK109448/</sup>  
*dlg1*<sup>GD4689</sup>*Cbp20*<sup>KK109448/</sup>  
*Fsn*<sup>GD11383</sup>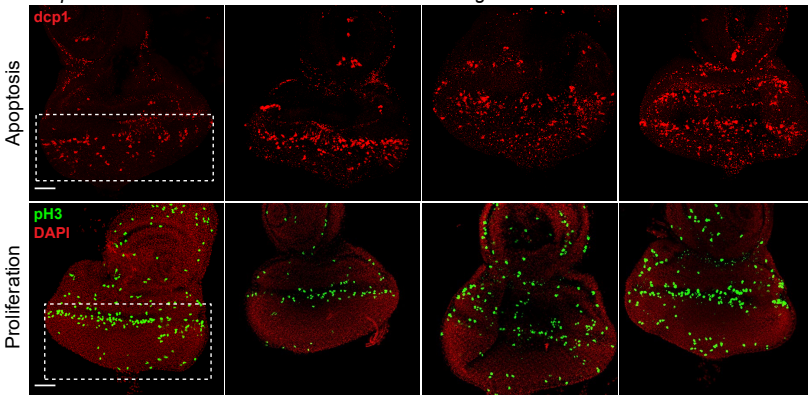**E****Apoptosis defects**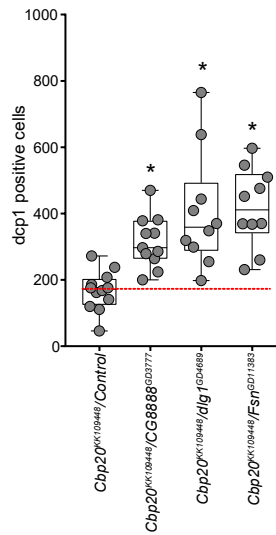**F****Cell proliferation defects**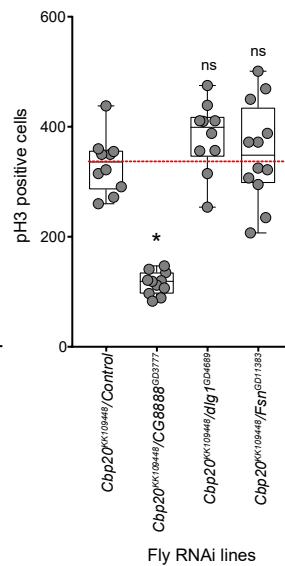

**Fig. 6**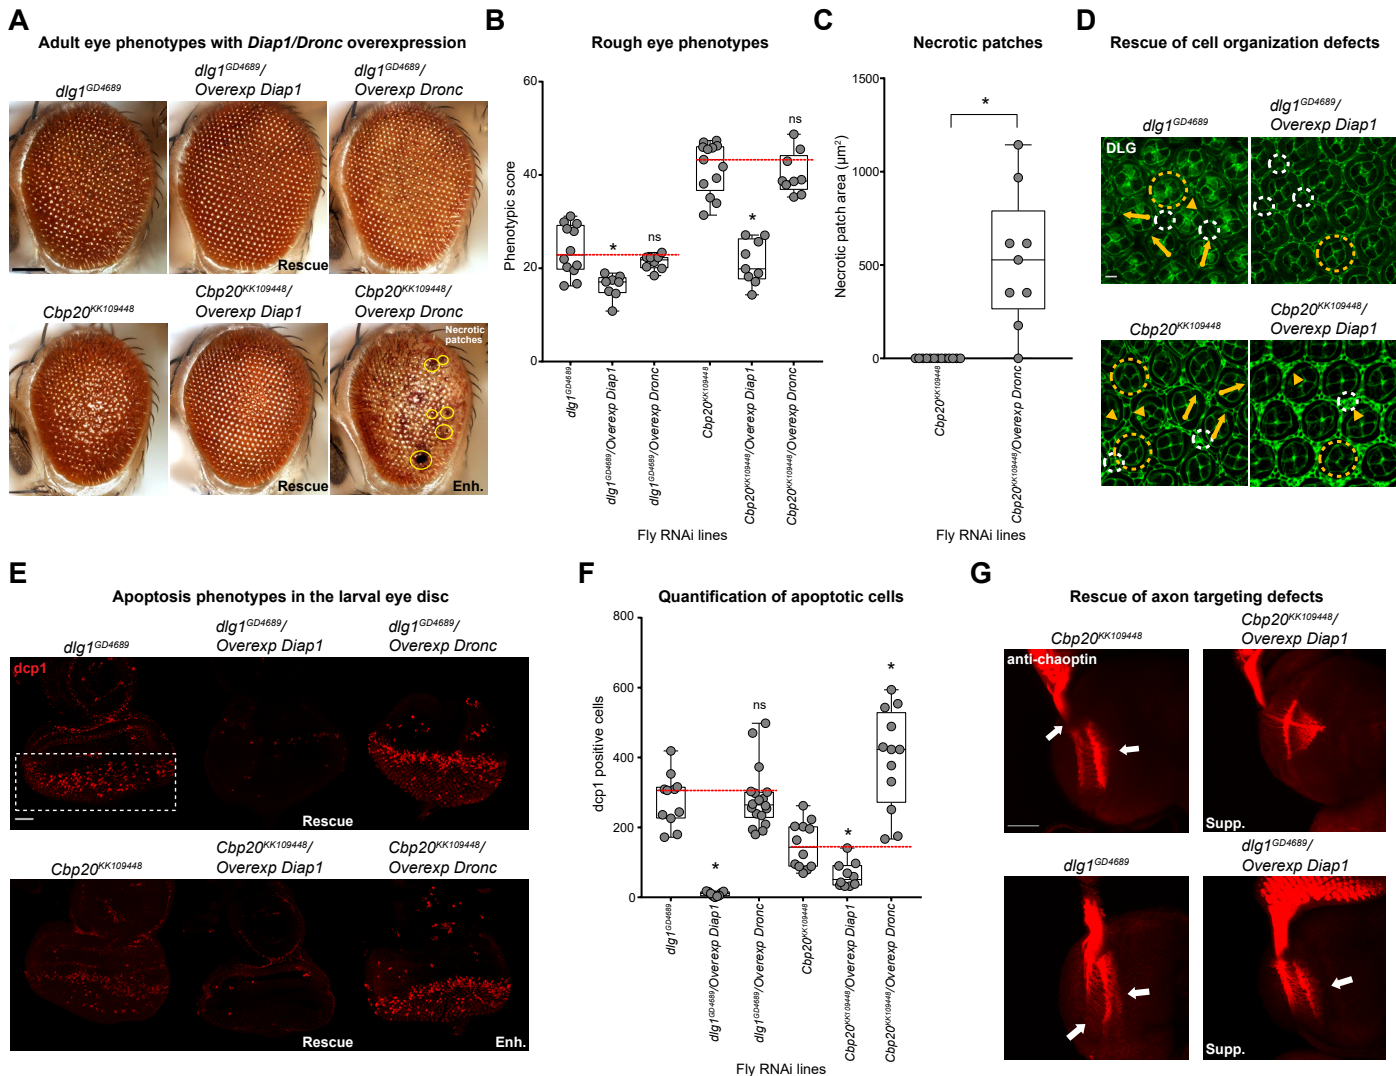

**Fig. 7**

**A**

**Pairwise interactions with homologs of neurodevelopmental genes**

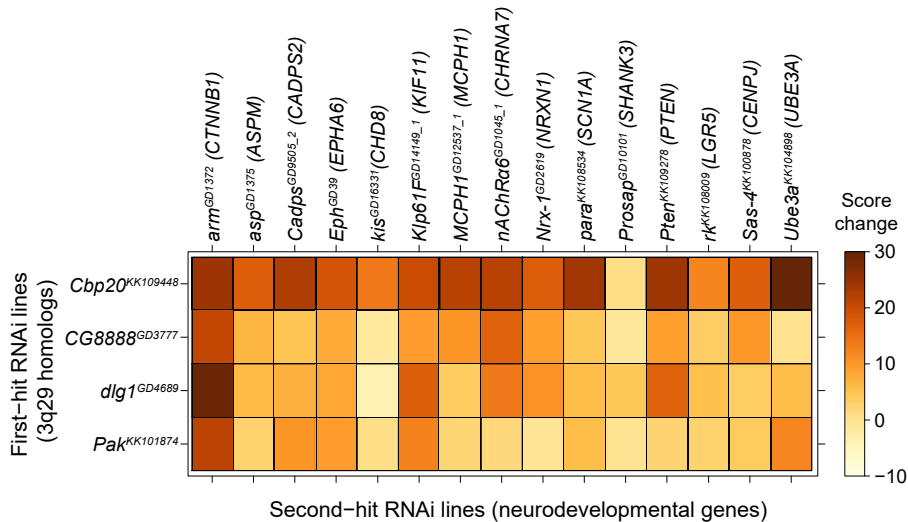

**B**

**Rough eye phenotypes of pairwise interactions**

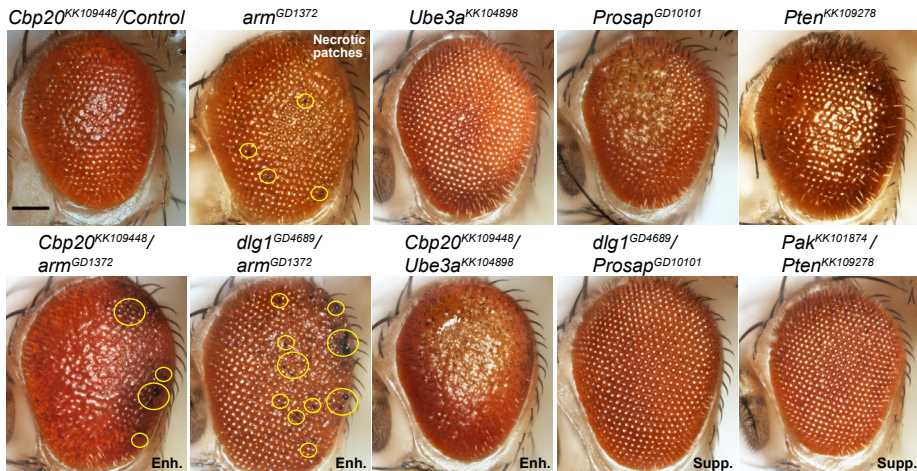

**Fig. 8**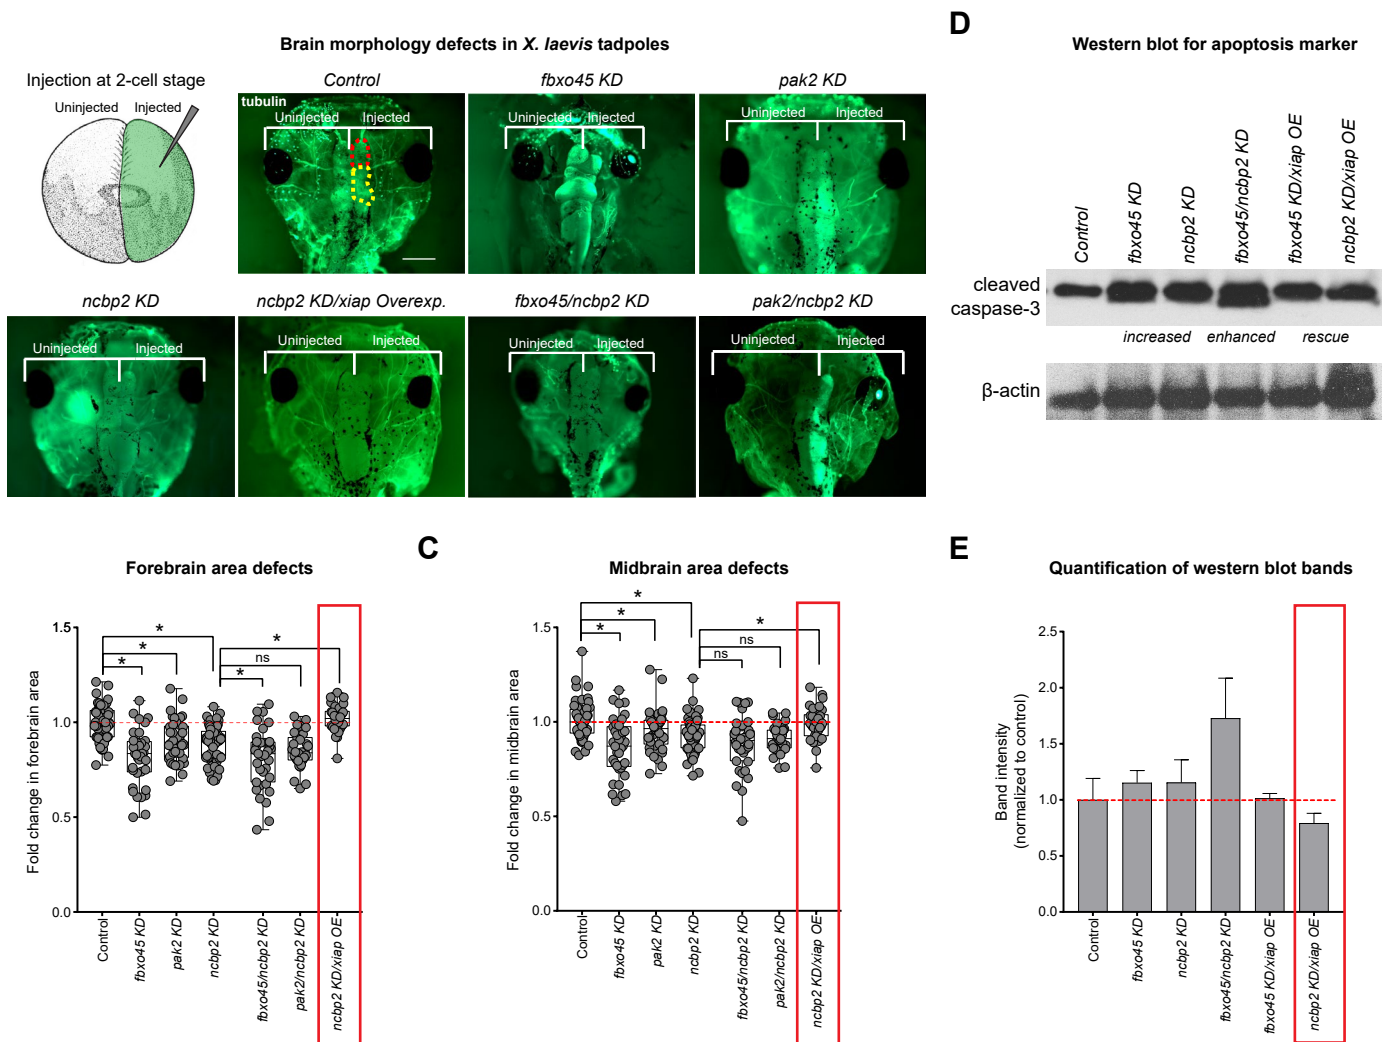

**Fig. 9****A**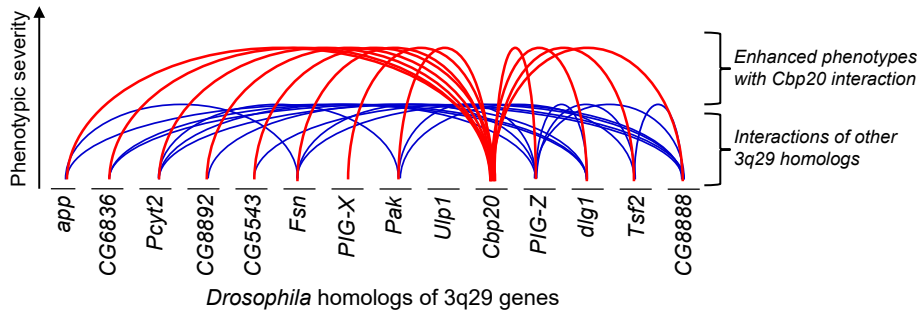**B**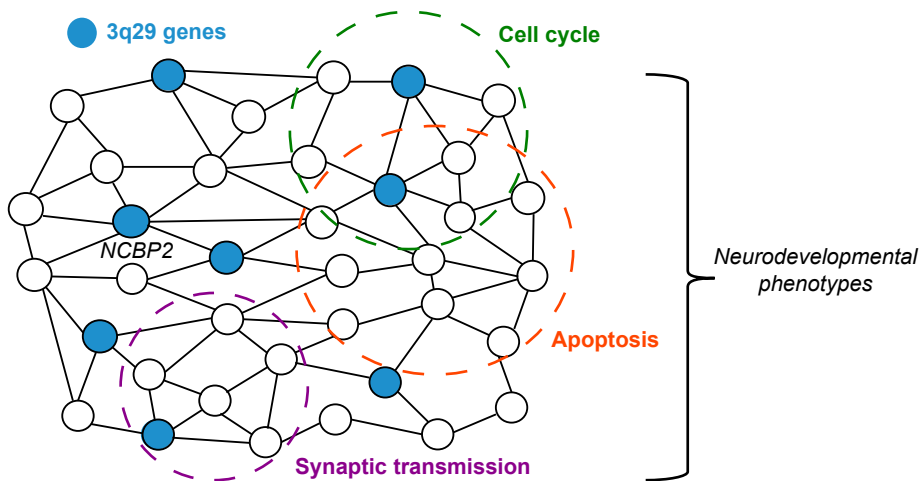

Source: https://www.biorxiv.org/content/10.1101/614750v3.full.pdf
